# Supplementary material for: Light-enabled alkenylation of iodocarboranes with unactivated alkenes
Source: Royal Society of Chemistry journal article supplement (doi:10.1039/d1dt03726a), 2021-11-22

## *Electronic Supplementary Information*

### **Light-enabled alkenylation of iodocarboranes with unactivated alkenes**

Hangcheng Ni, Zhenpin Lu, and Zuowei Xie\*

*Department of Chemistry and State Key Laboratory of Synthetic Chemistry,  
The Chinese University of Hong Kong, Shatin, N. T., Hong Kong, China*

*Email: [zxie@cuhk.edu.hk](mailto:zxie@cuhk.edu.hk)*

#### Table of Contents

|                                                            |    |
|------------------------------------------------------------|----|
| Crystal Data and Summary of Data Collection and Refinement | S2 |
| Setup of the photoreaction                                 | S3 |
| NMR Spectra                                                | S4 |

**Table S1.** Crystal Data and Summary of Data Collection and Refinement for **3Aa**, **3An**, **3Ap** and **3Fa**.

| Compound                                     | <b>3Aa</b>                                      | <b>3An</b>                                      | <b>3Ap</b>                                      | <b>3Fa</b>                                         |
|----------------------------------------------|-------------------------------------------------|-------------------------------------------------|-------------------------------------------------|----------------------------------------------------|
| formula                                      | C <sub>11</sub> H <sub>20</sub> B <sub>10</sub> | C <sub>12</sub> H <sub>22</sub> B <sub>10</sub> | C <sub>17</sub> H <sub>24</sub> B <sub>10</sub> | C <sub>13</sub> H <sub>26</sub> B <sub>10</sub> Si |
| Cryst size(mm <sup>3</sup> )                 | 0.40 x 0.30 x<br>0.20                           | 0.50 x 0.40 x<br>0.30                           | 0.40 x 0.30 x<br>0.20                           | 0.50 x 0.40 x<br>0.30                              |
| Fw                                           | 260.37                                          | 274.39                                          | 336.46                                          | 318.53                                             |
| Cryst syst                                   | orthorhombic                                    | orthorhombic                                    | orthorhombic                                    | monoclinic                                         |
| Space group                                  | Pna2 <sub>1</sub>                               | P2 <sub>1</sub> 2 <sub>1</sub> 2 <sub>1</sub>   | Pca2 <sub>1</sub>                               | P2 <sub>1</sub> /c                                 |
| <i>a</i> , Å                                 | 20.057(11)                                      | 11.7028(5)                                      | 21.065(8)                                       | 17.950(15)                                         |
| <i>b</i> , Å                                 | 7.8629(4)                                       | 11.9322(6)                                      | 8.0636(4)                                       | 7.2031(6)                                          |
| <i>c</i> , Å                                 | 19.9257(12)                                     | 12.0721(6)                                      | 11.902(6)                                       | 17.2814(14)                                        |
| α, deg                                       | 90.00                                           | 90.00                                           | 90.00                                           | 90.00                                              |
| β, deg                                       | 90.00                                           | 90.00                                           | 90.00                                           | 116.825(4)                                         |
| γ, deg                                       | 90.00                                           | 90.00                                           | 90.00                                           | 90.00                                              |
| <i>V</i> , Å <sup>3</sup>                    | 3142.4(3)                                       | 1685.75(14)                                     | 2021.69(16)                                     | 1994.0(3)                                          |
| <i>Z</i>                                     | 8                                               | 4                                               | 4                                               | 4                                                  |
| <i>D</i> <sub>calc</sub> , Mg/m <sup>3</sup> | 1.101                                           | 1.081                                           | 1.105                                           | 1.061                                              |
| Radiation (λ), Å                             | 1.54178                                         | 0.71073                                         | 0.71073                                         | 0.71073                                            |
| 2θ range, deg                                | 8.82 to 137.42                                  | 4.82 to 50.50                                   | 5.05 to 50.49                                   | 2.54 to 50.50                                      |
| μ, mm <sup>-1</sup>                          | 0.361                                           | 0.052                                           | 0.055                                           | 0.109                                              |
| <i>F</i> (000)                               | 1088                                            | 576                                             | 704                                             | 672                                                |
| no. of obsd reflns                           | 5743                                            | 3039                                            | 3650                                            | 3611                                               |
| no. of params refnd                          | 379                                             | 208                                             | 245                                             | 217                                                |
| Goodness of fit                              | 1.043                                           | 1.054                                           | 1.066                                           | 1.054                                              |
| R1                                           | 0.0737                                          | 0.0782                                          | 0.0570                                          | 0.0443                                             |
| wR2                                          | 0.1893                                          | 0.2140                                          | 0.1419                                          | 0.1234                                             |

## Setup of the photoreaction

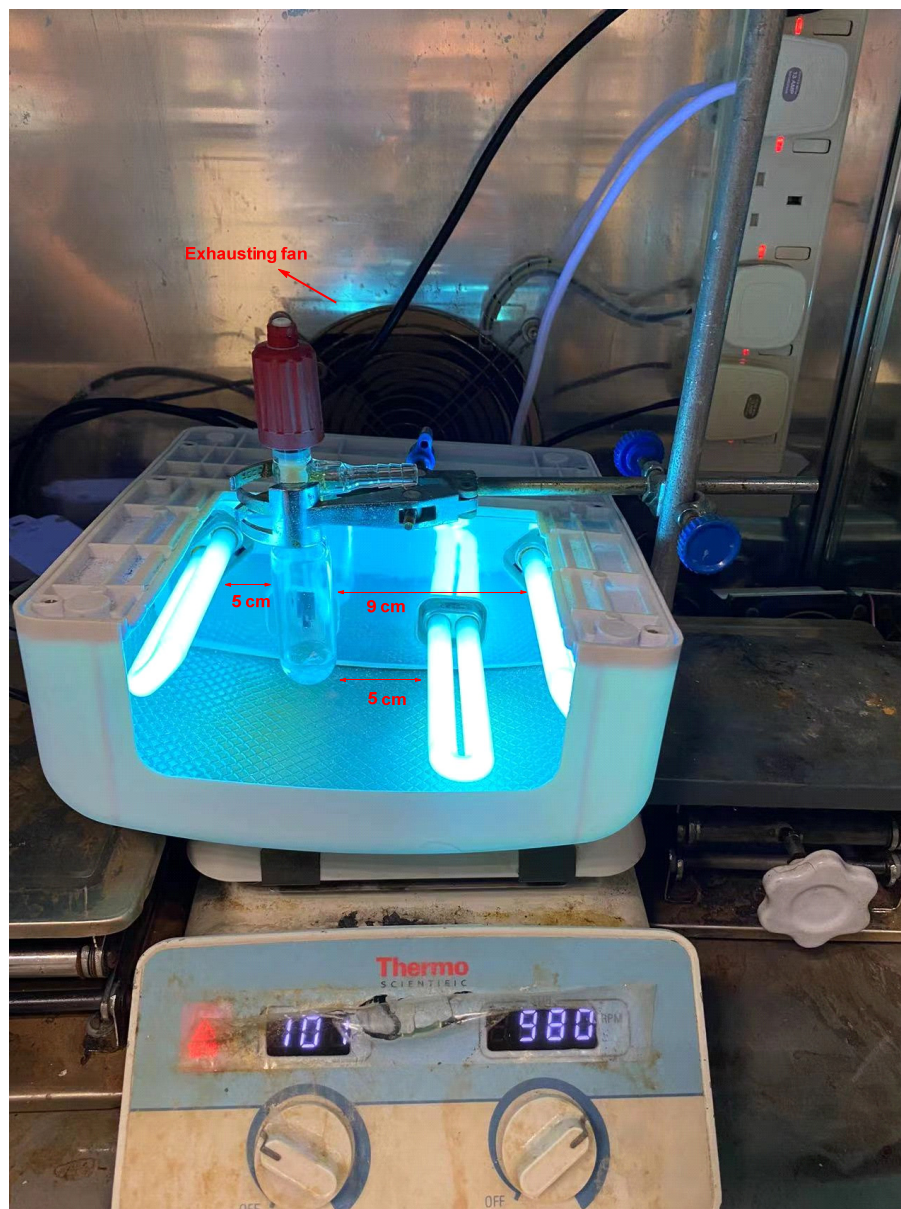

Figure S1. Standard setup of the photoreaction [3 x 9 W UV (365 nm) lamp]

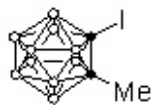

**1Aa**

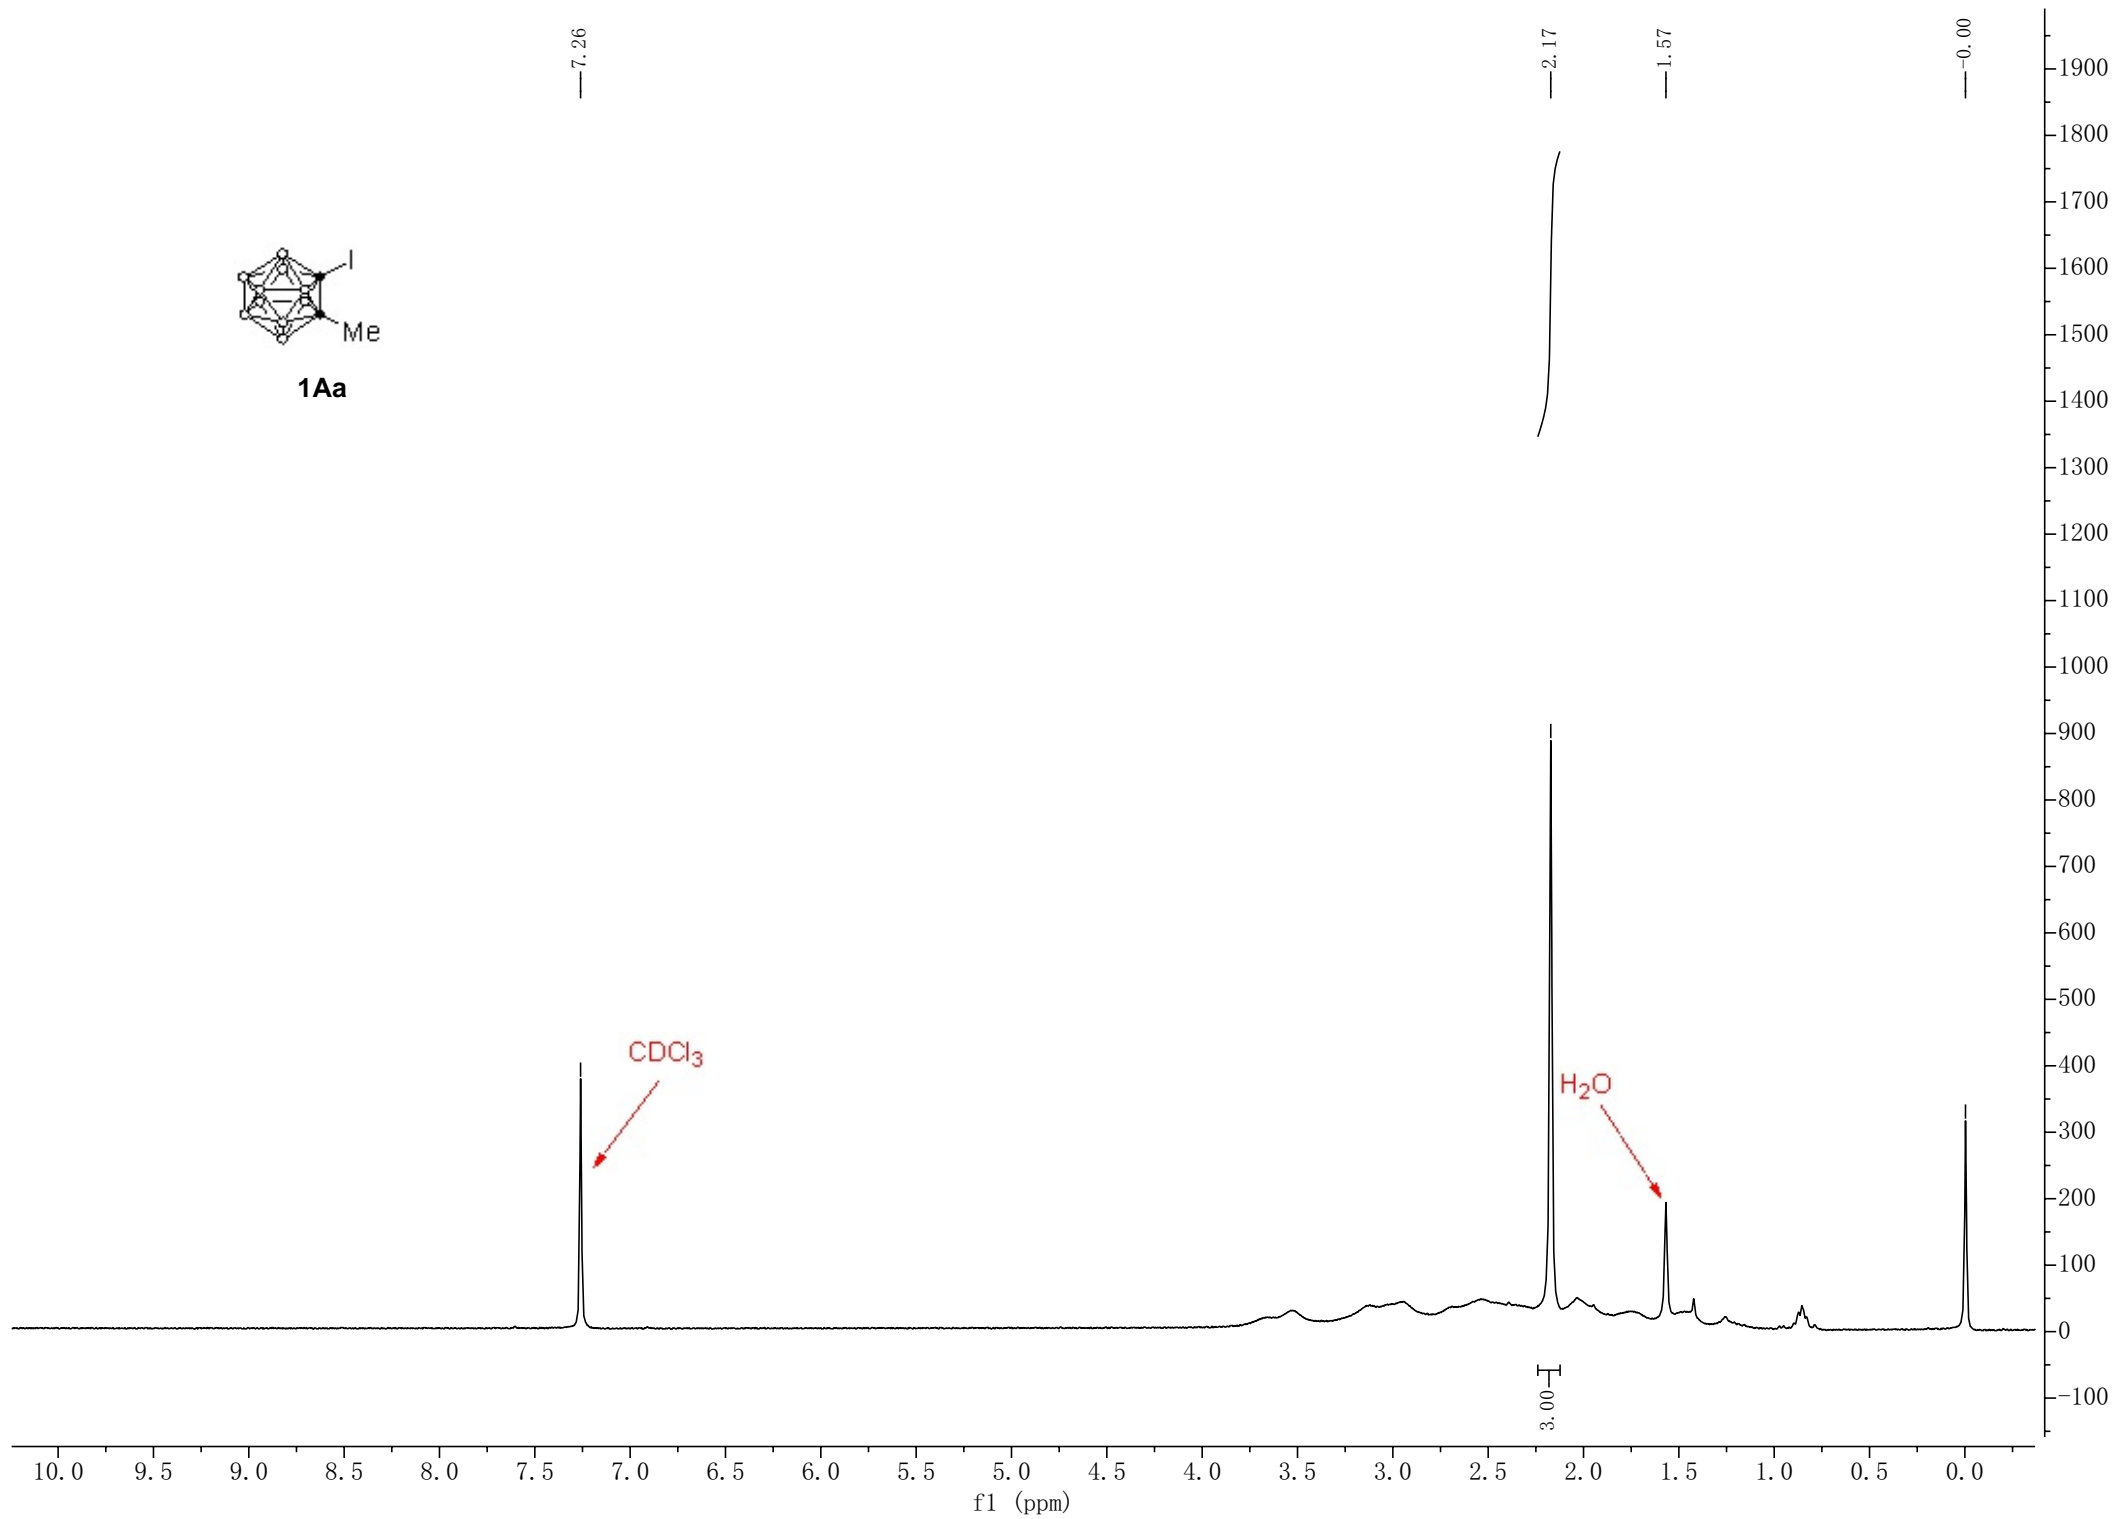

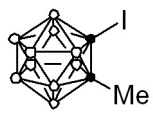

1Aa

— -3.12  
— -5.30  
— -6.65  
— -7.08  
— -8.67  
— -9.92

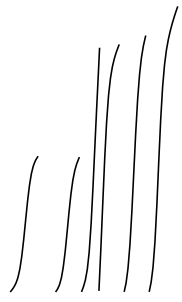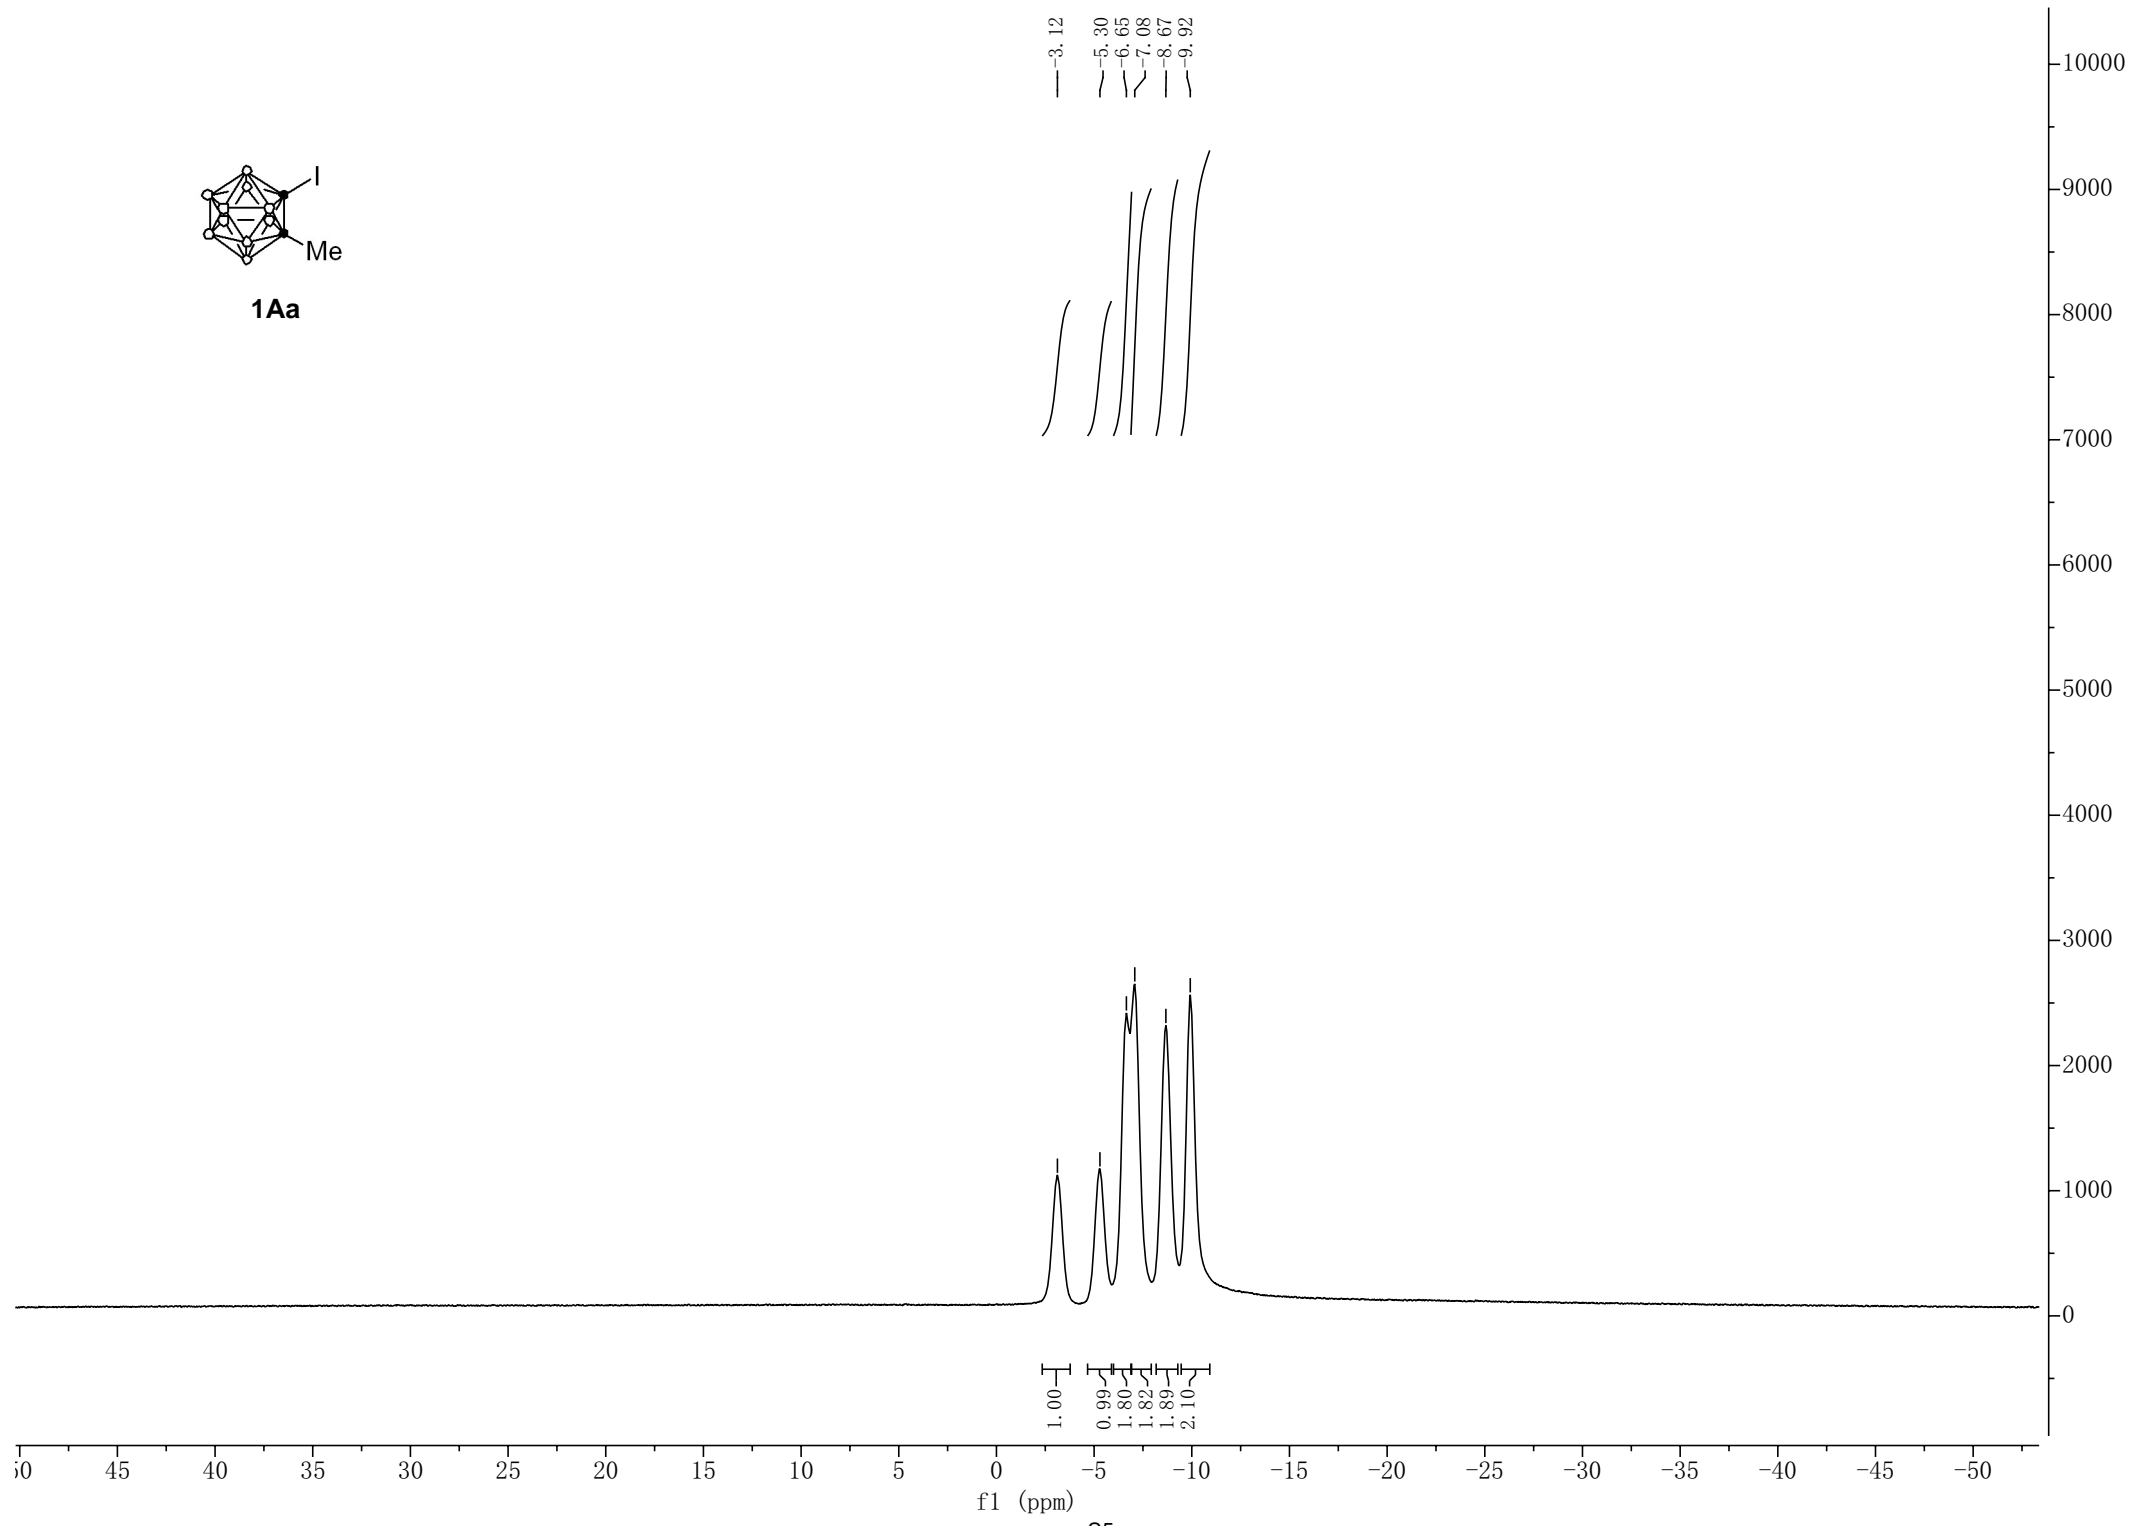

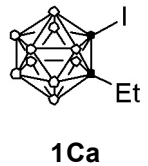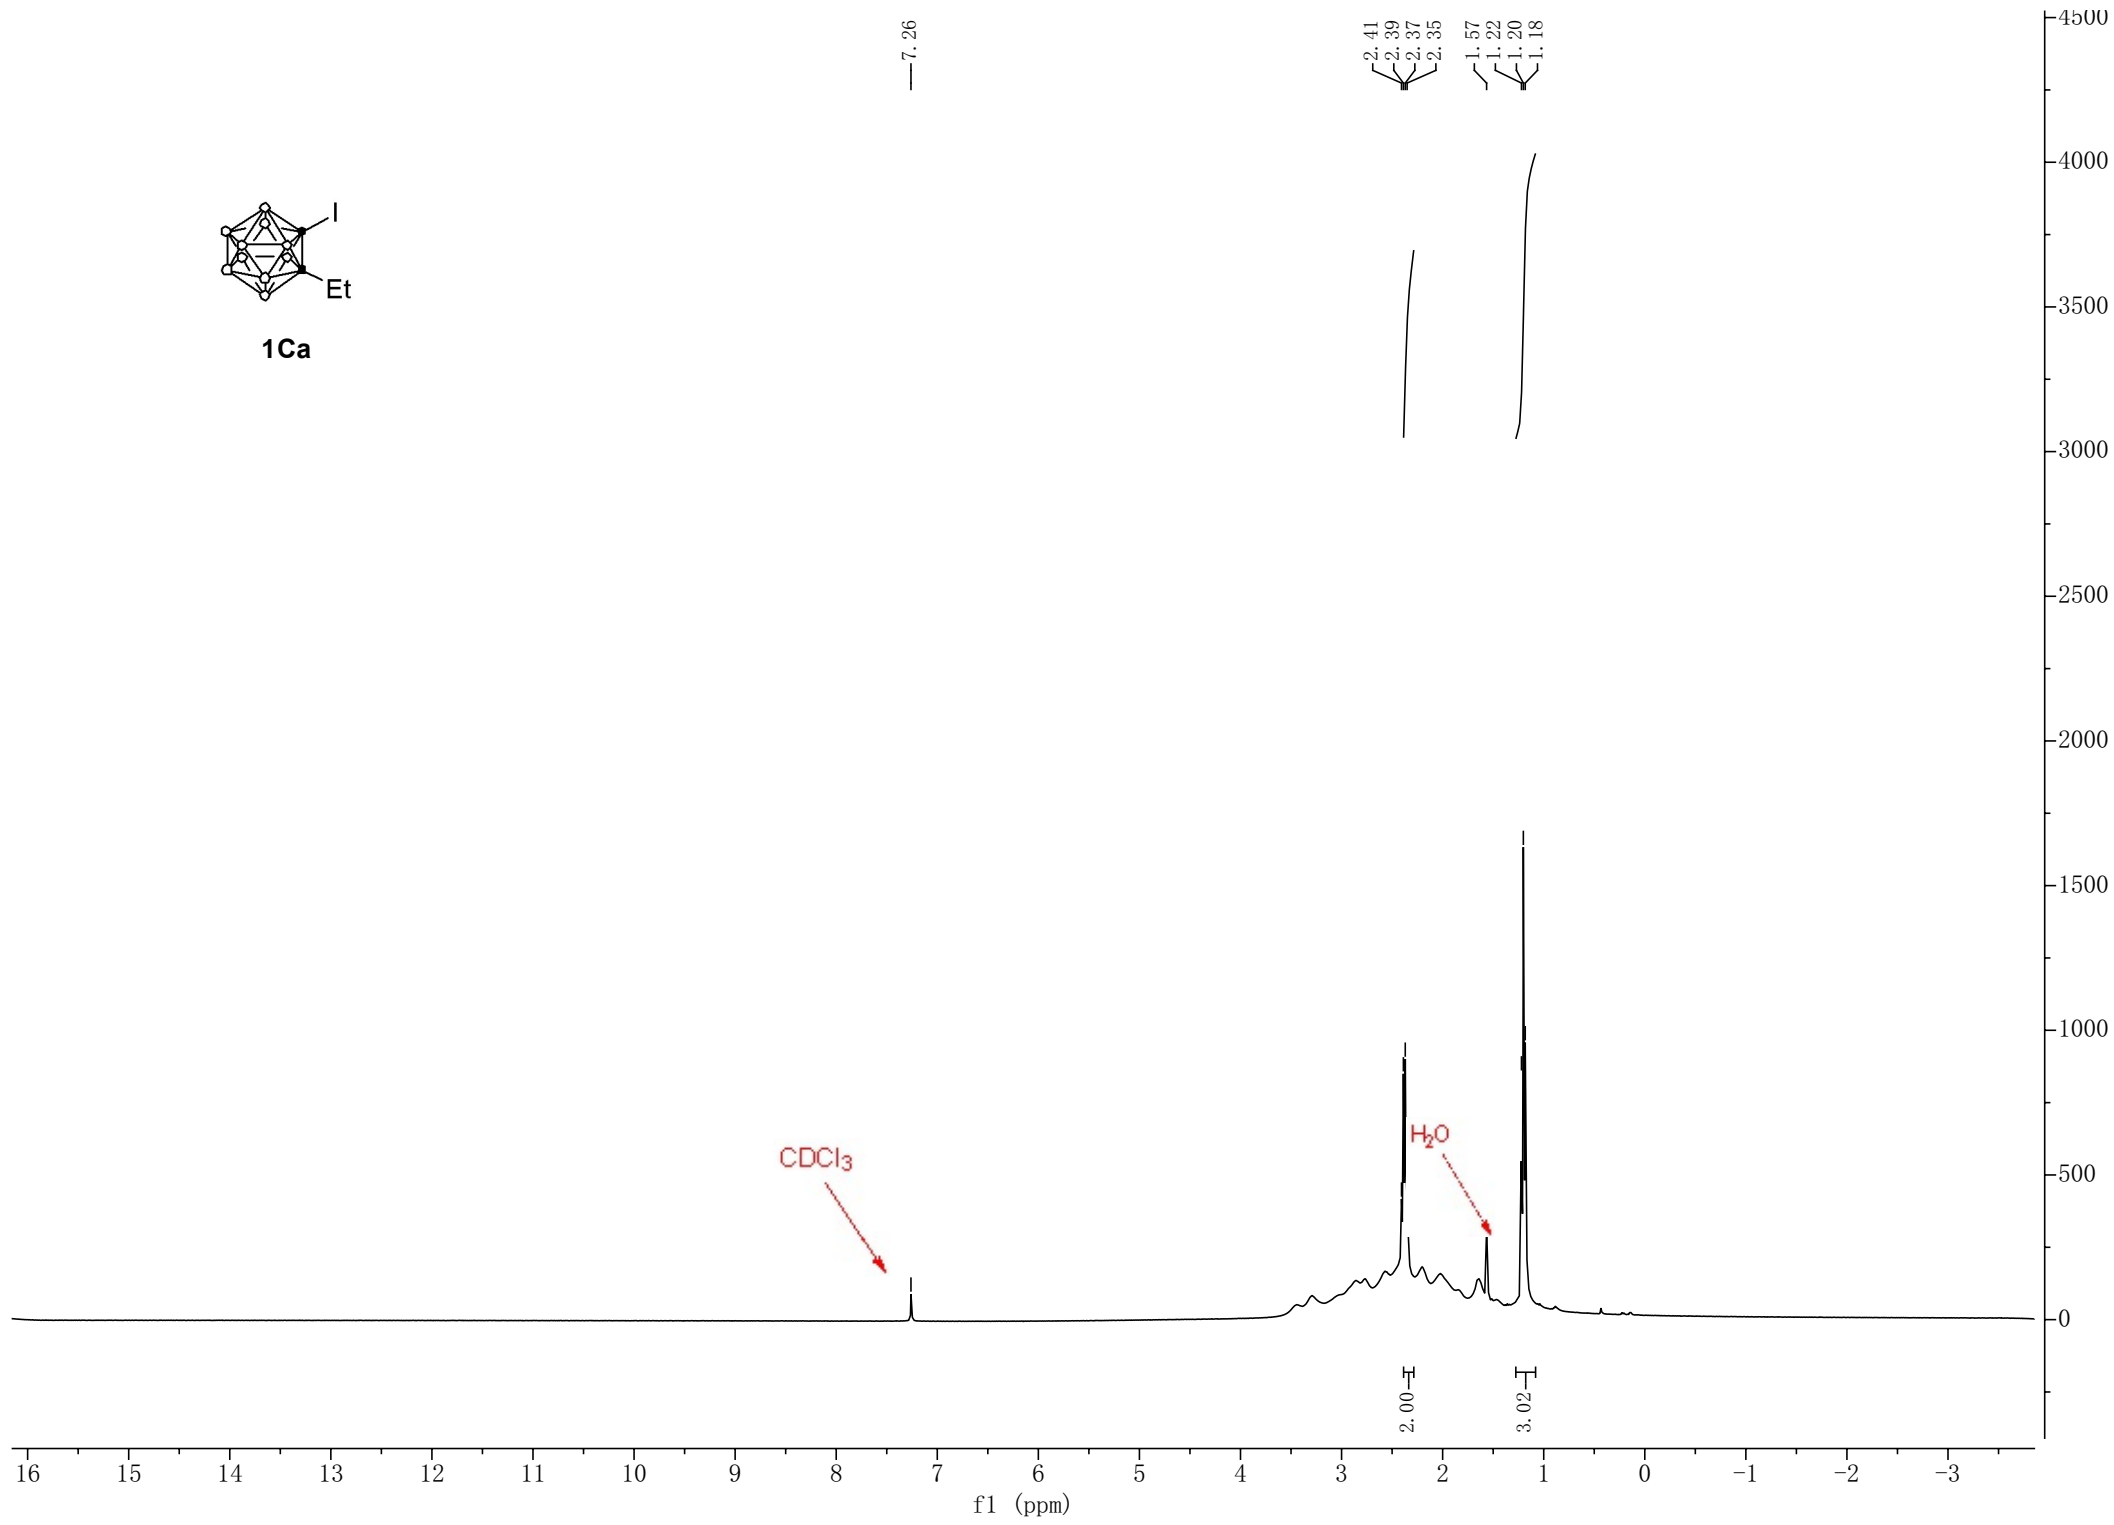

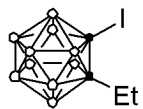

1Ca

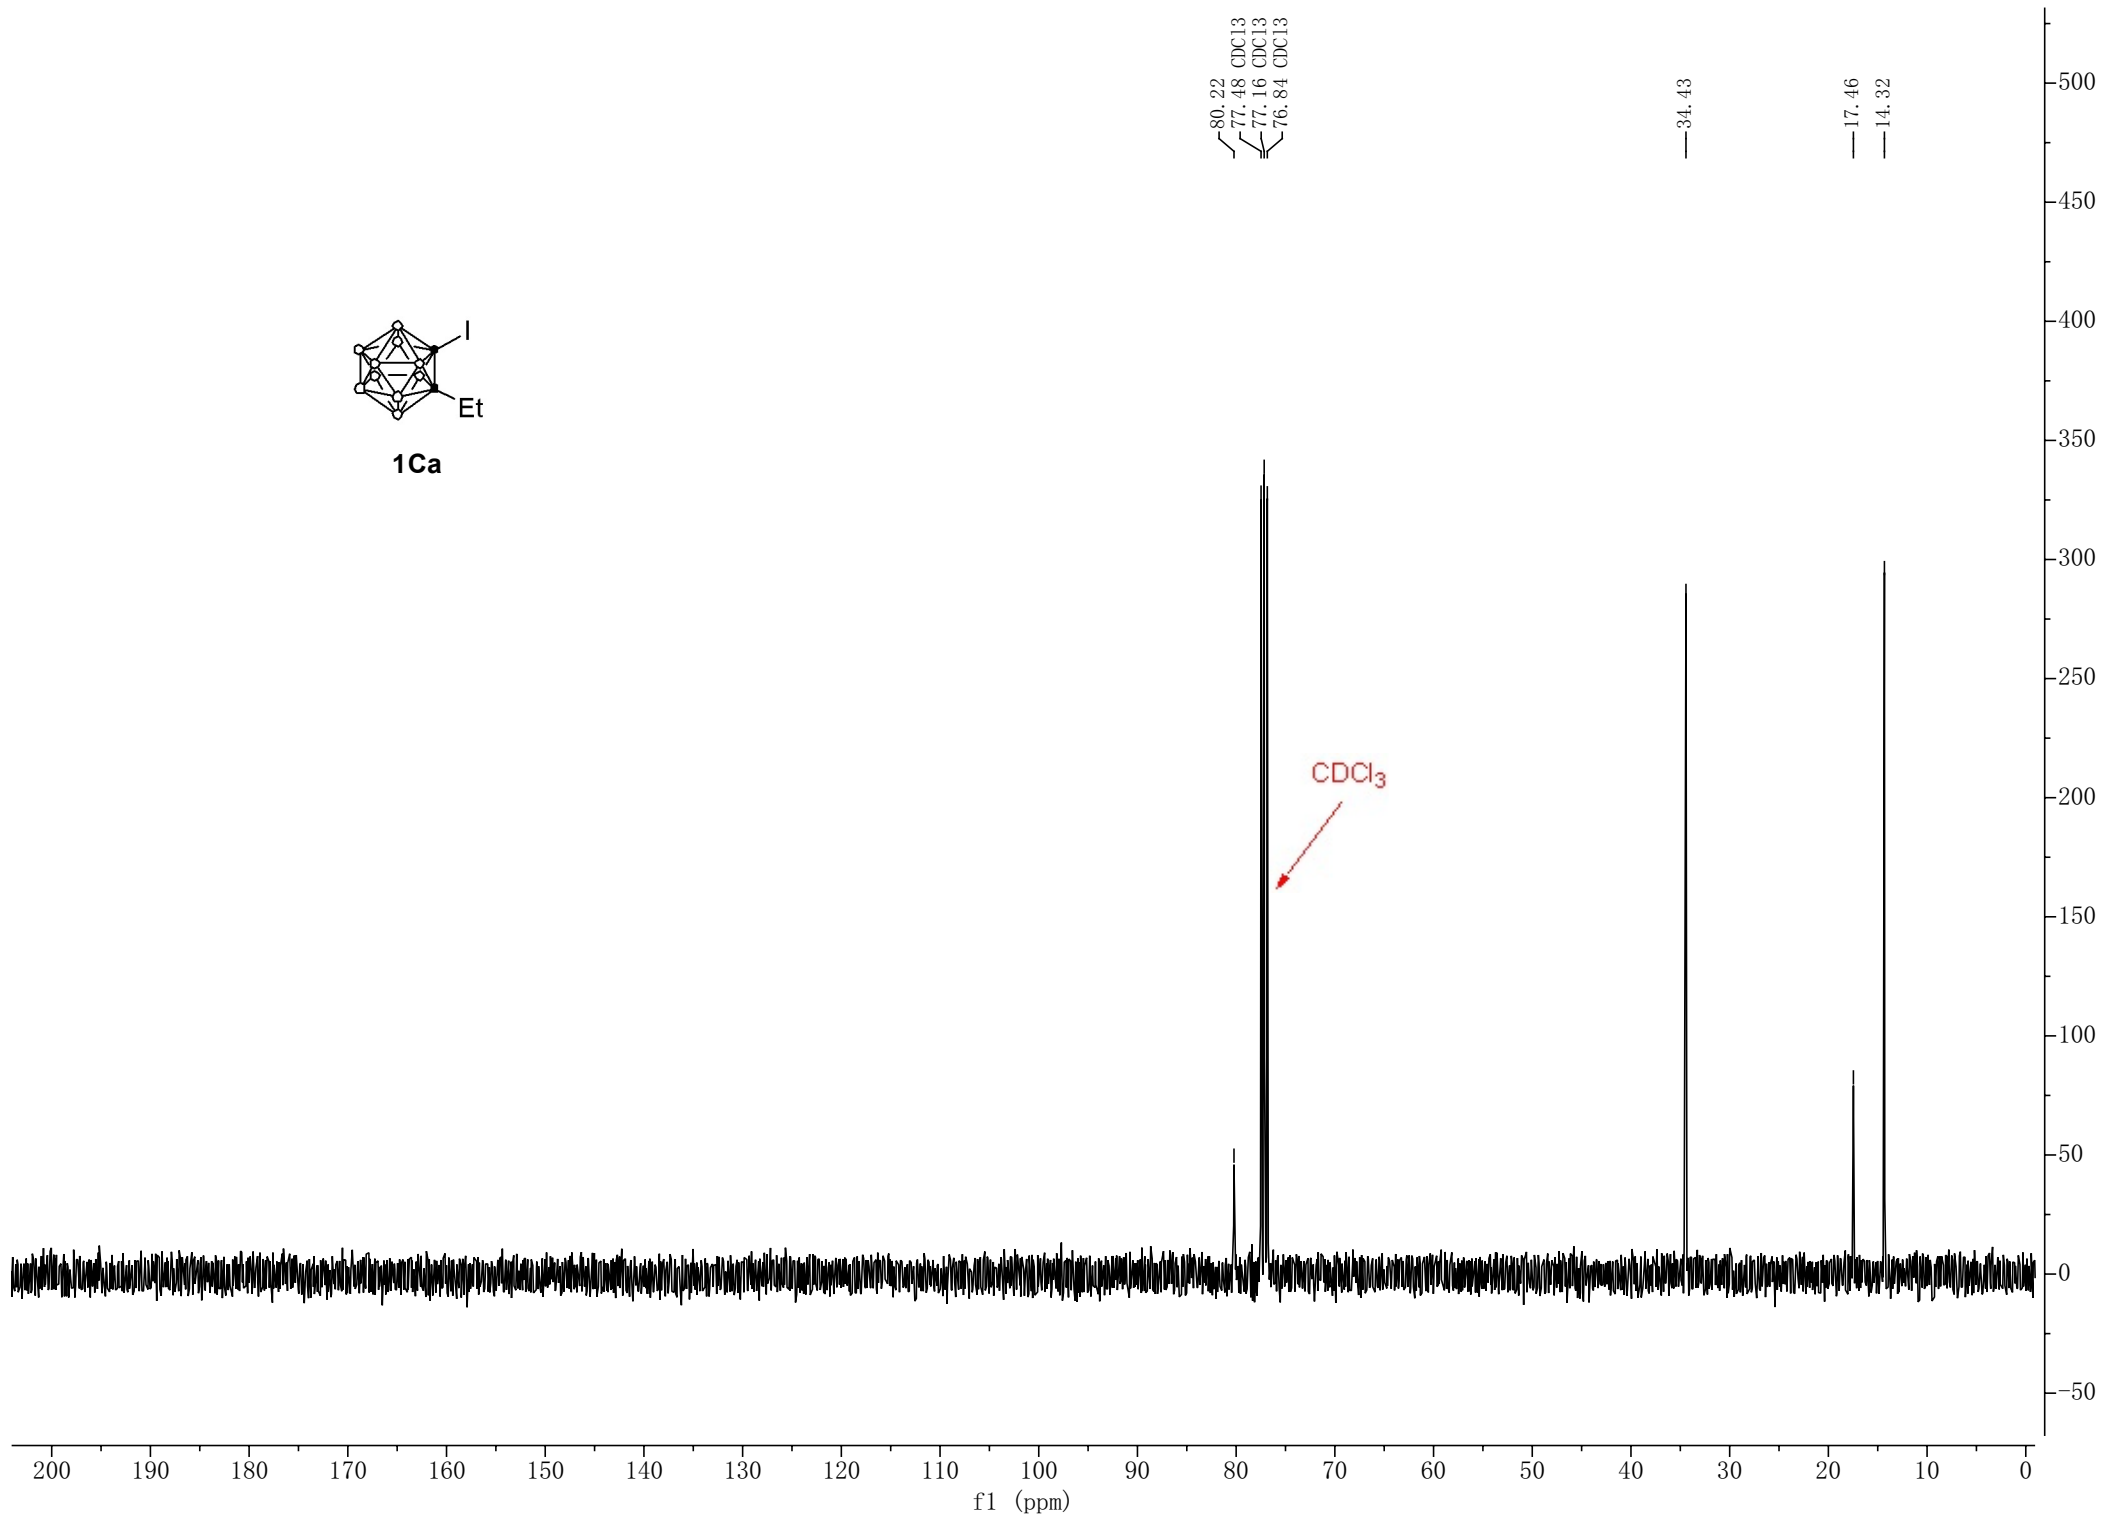

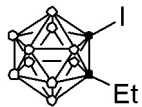

**1Ca**

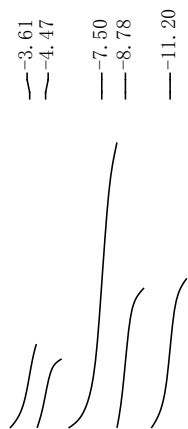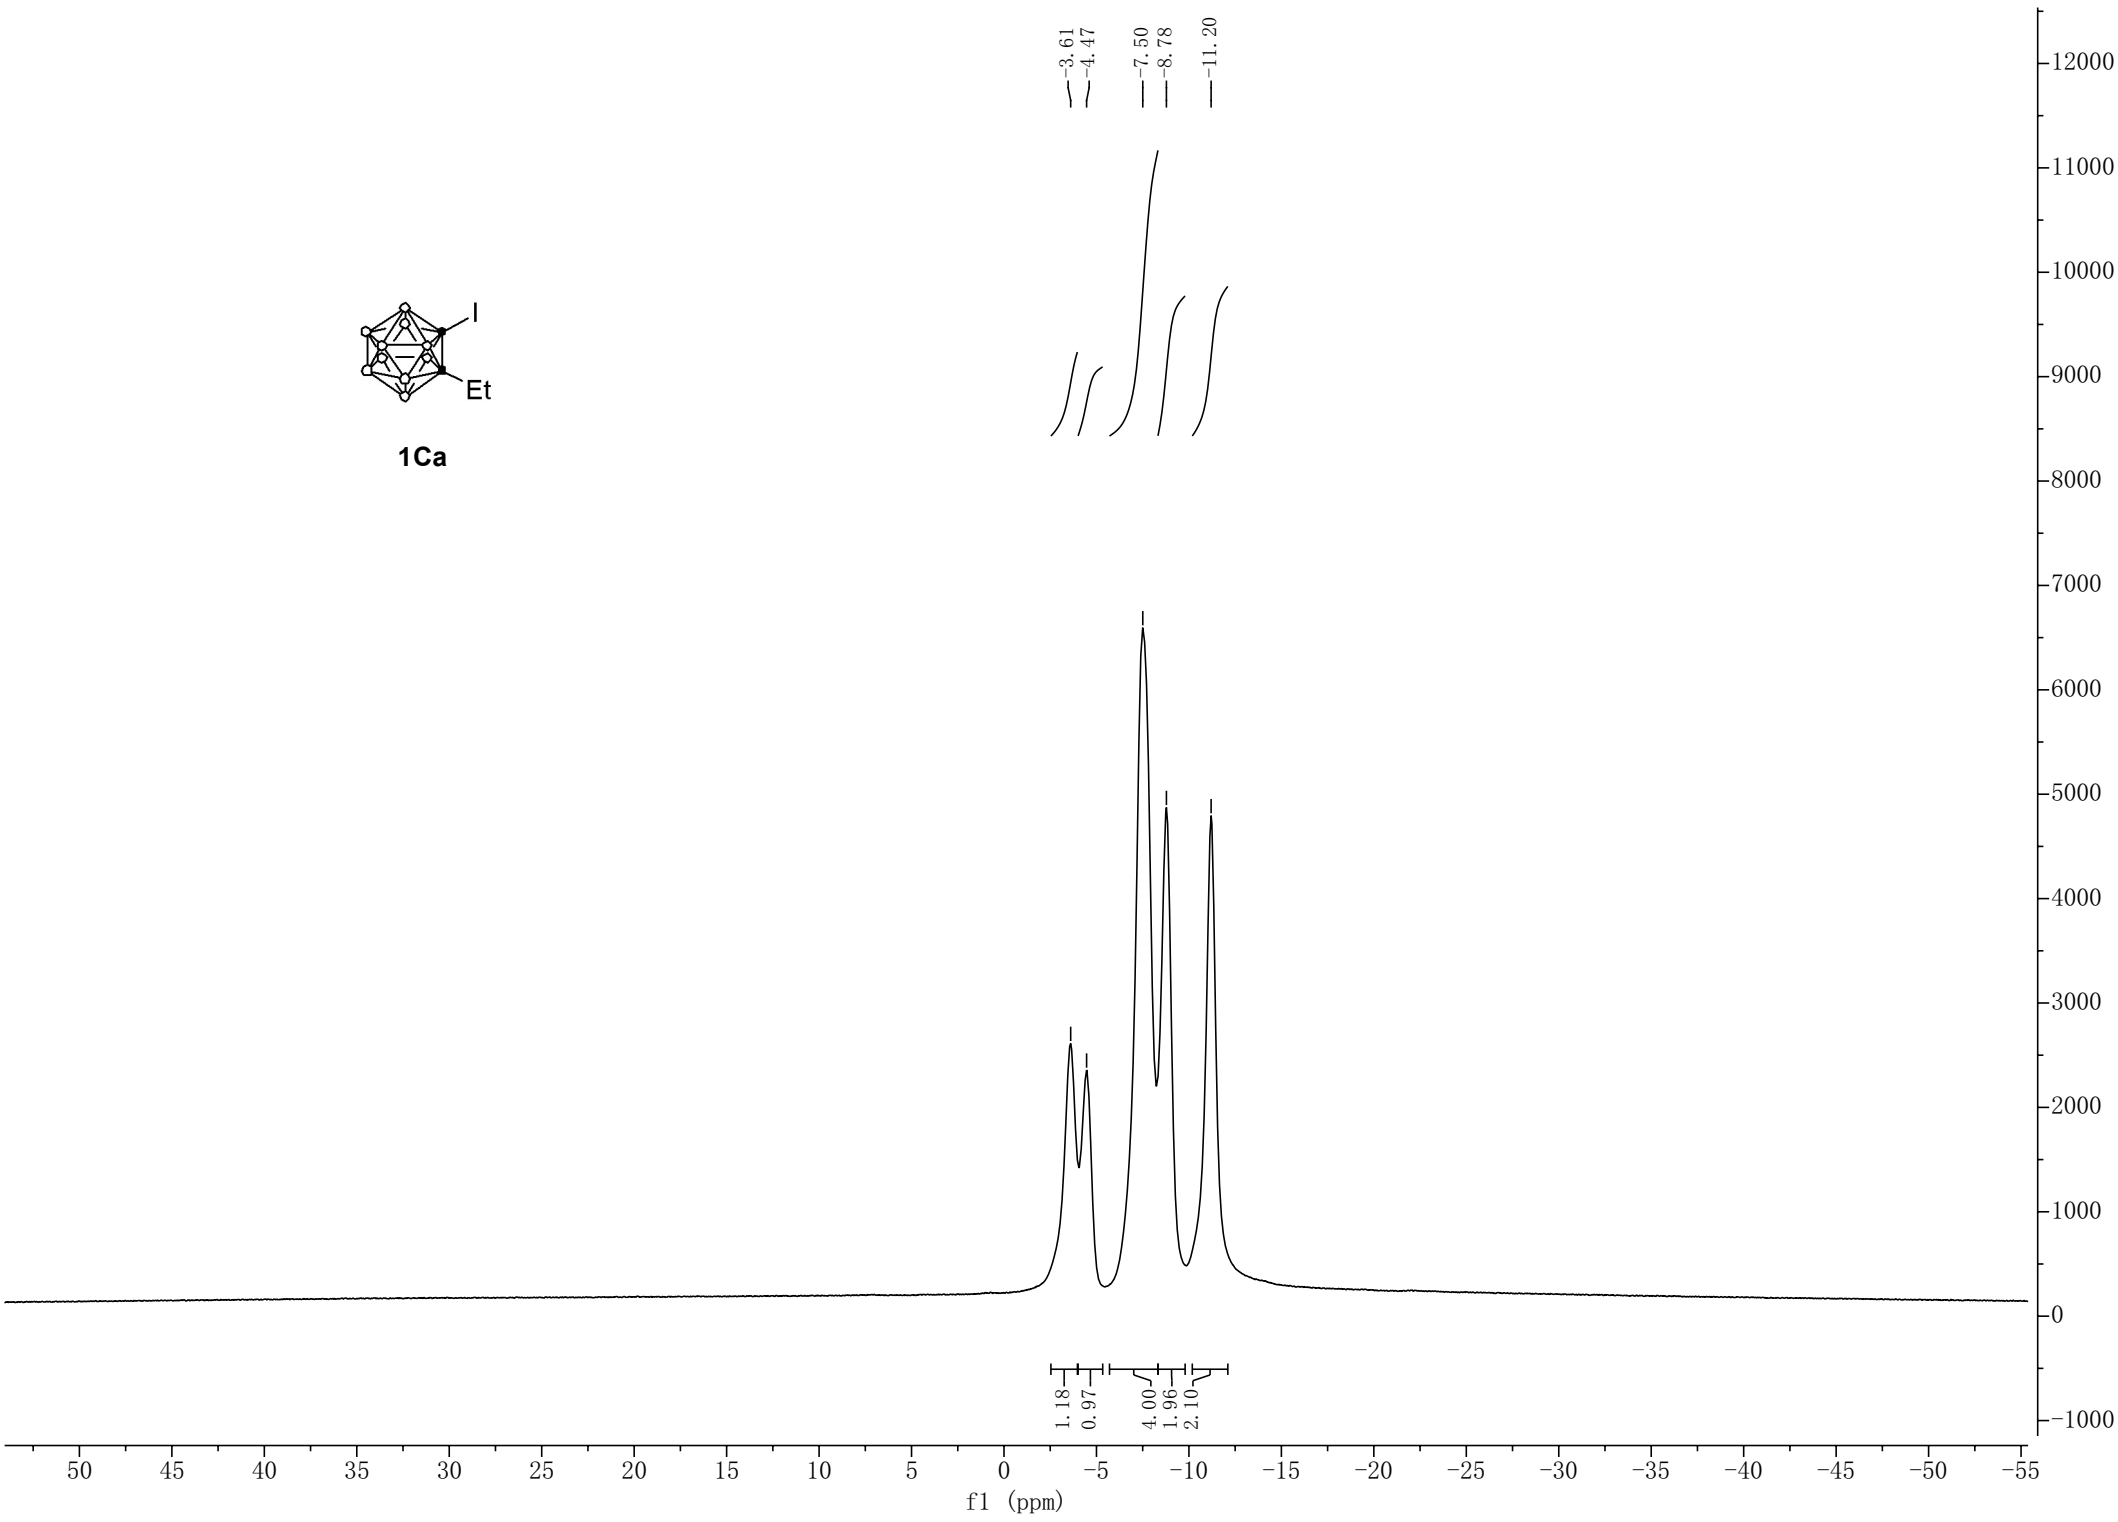



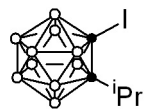

1Da

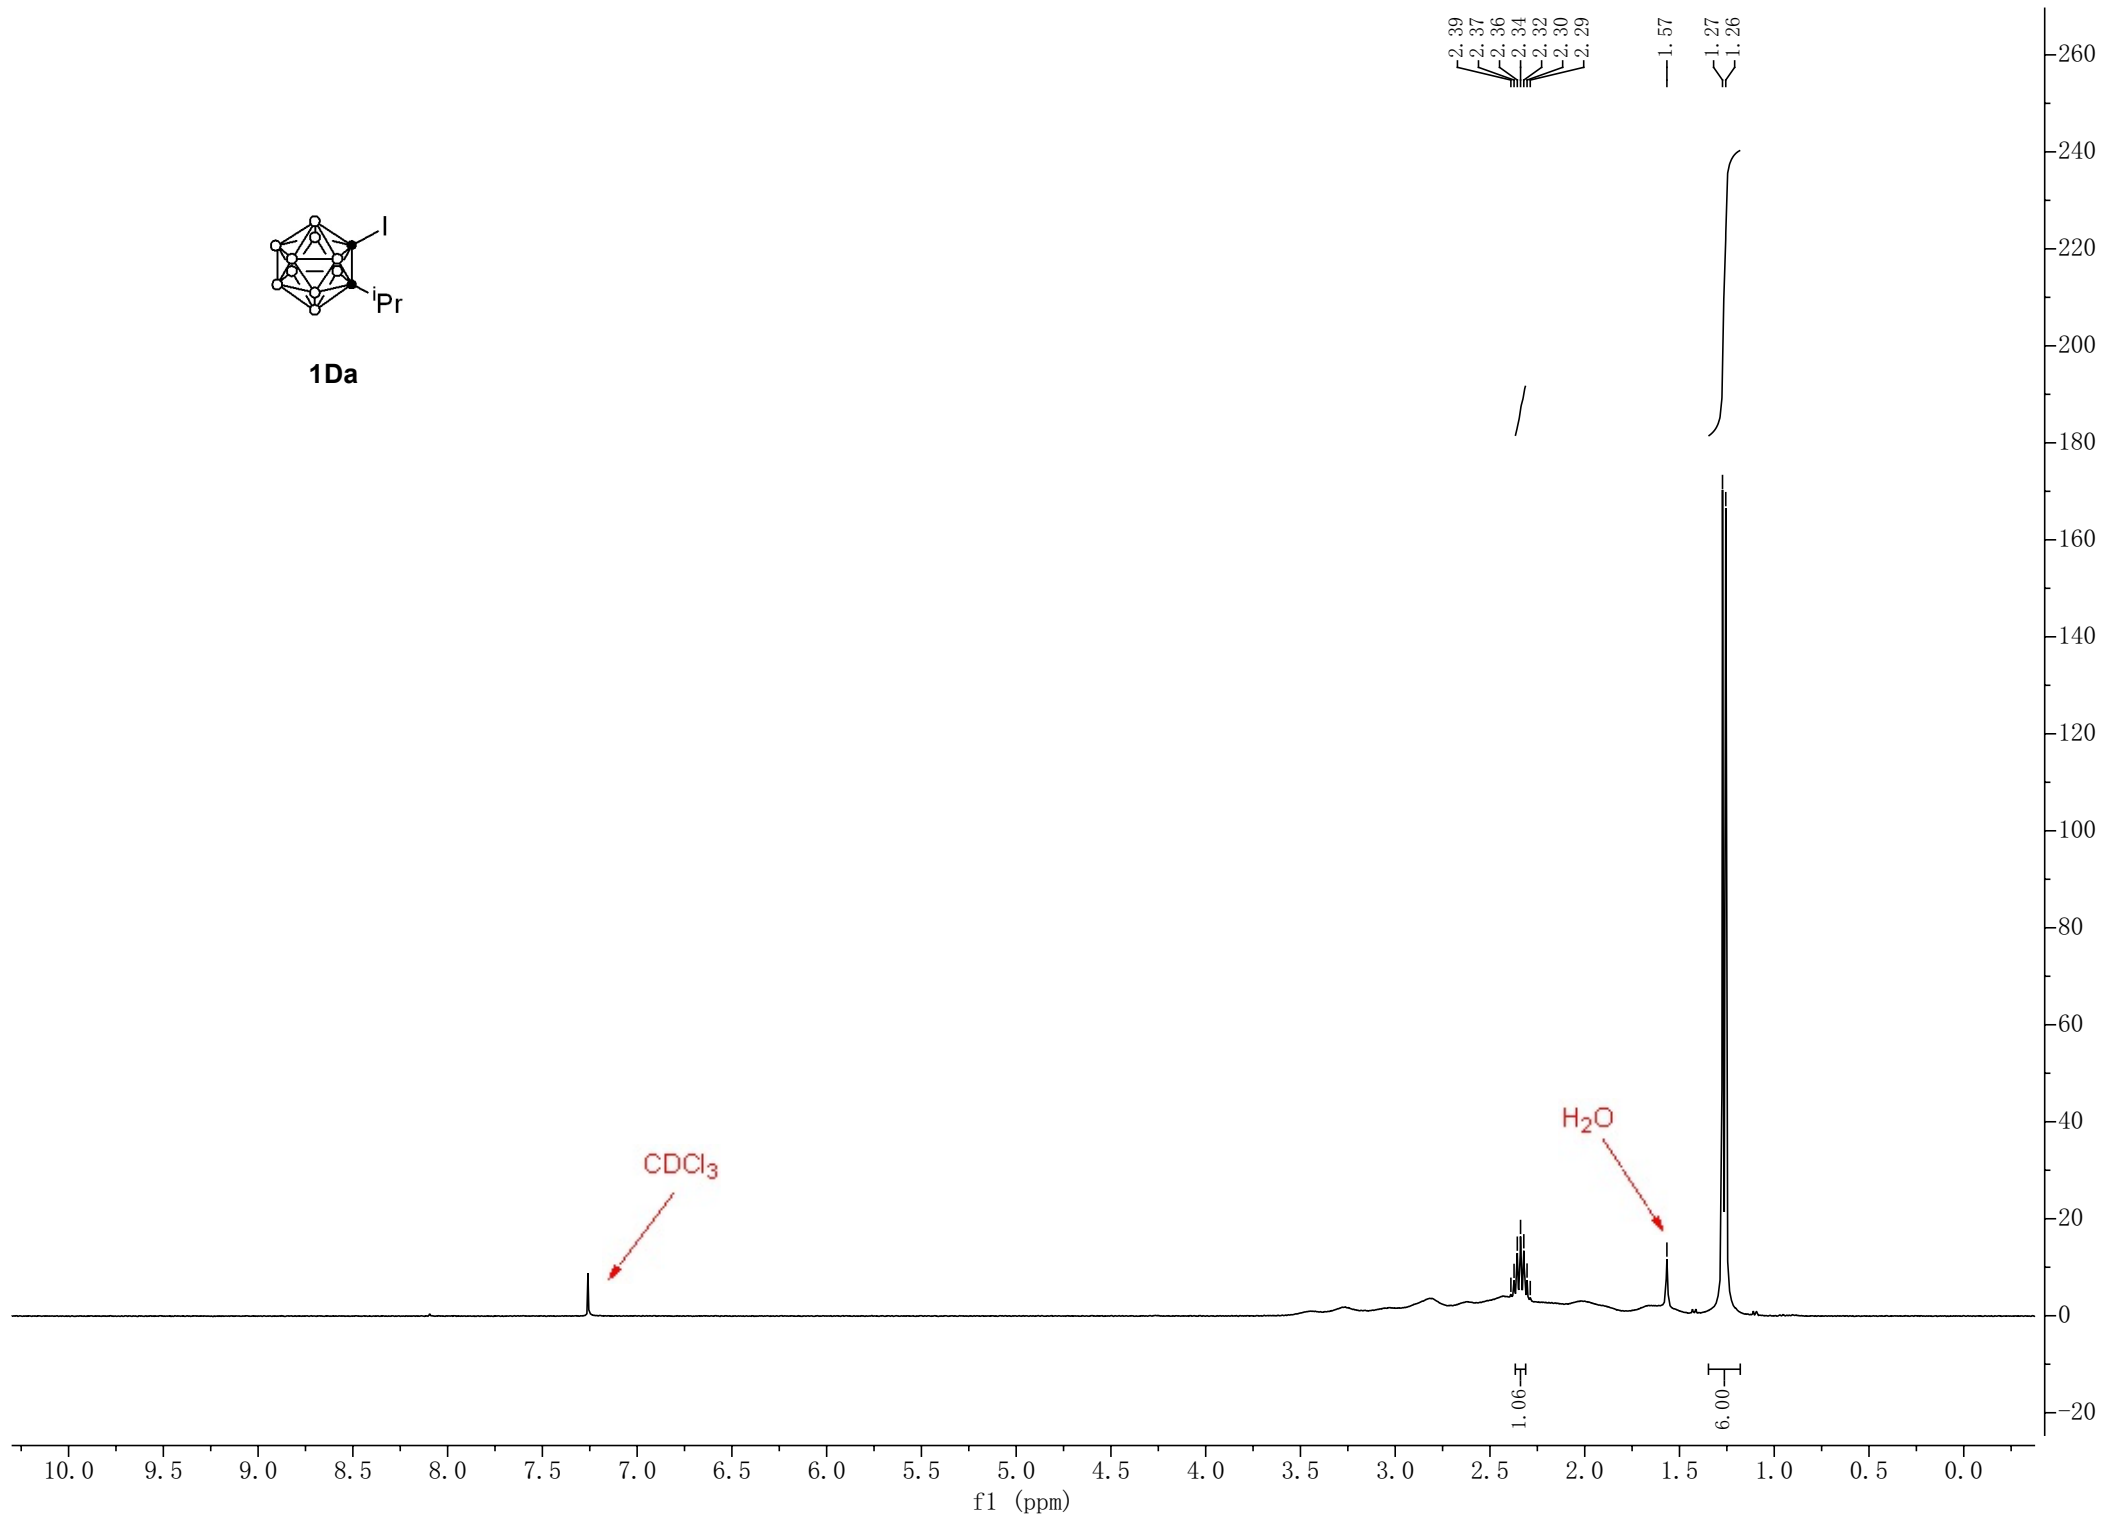

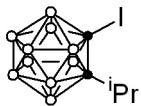

1Da

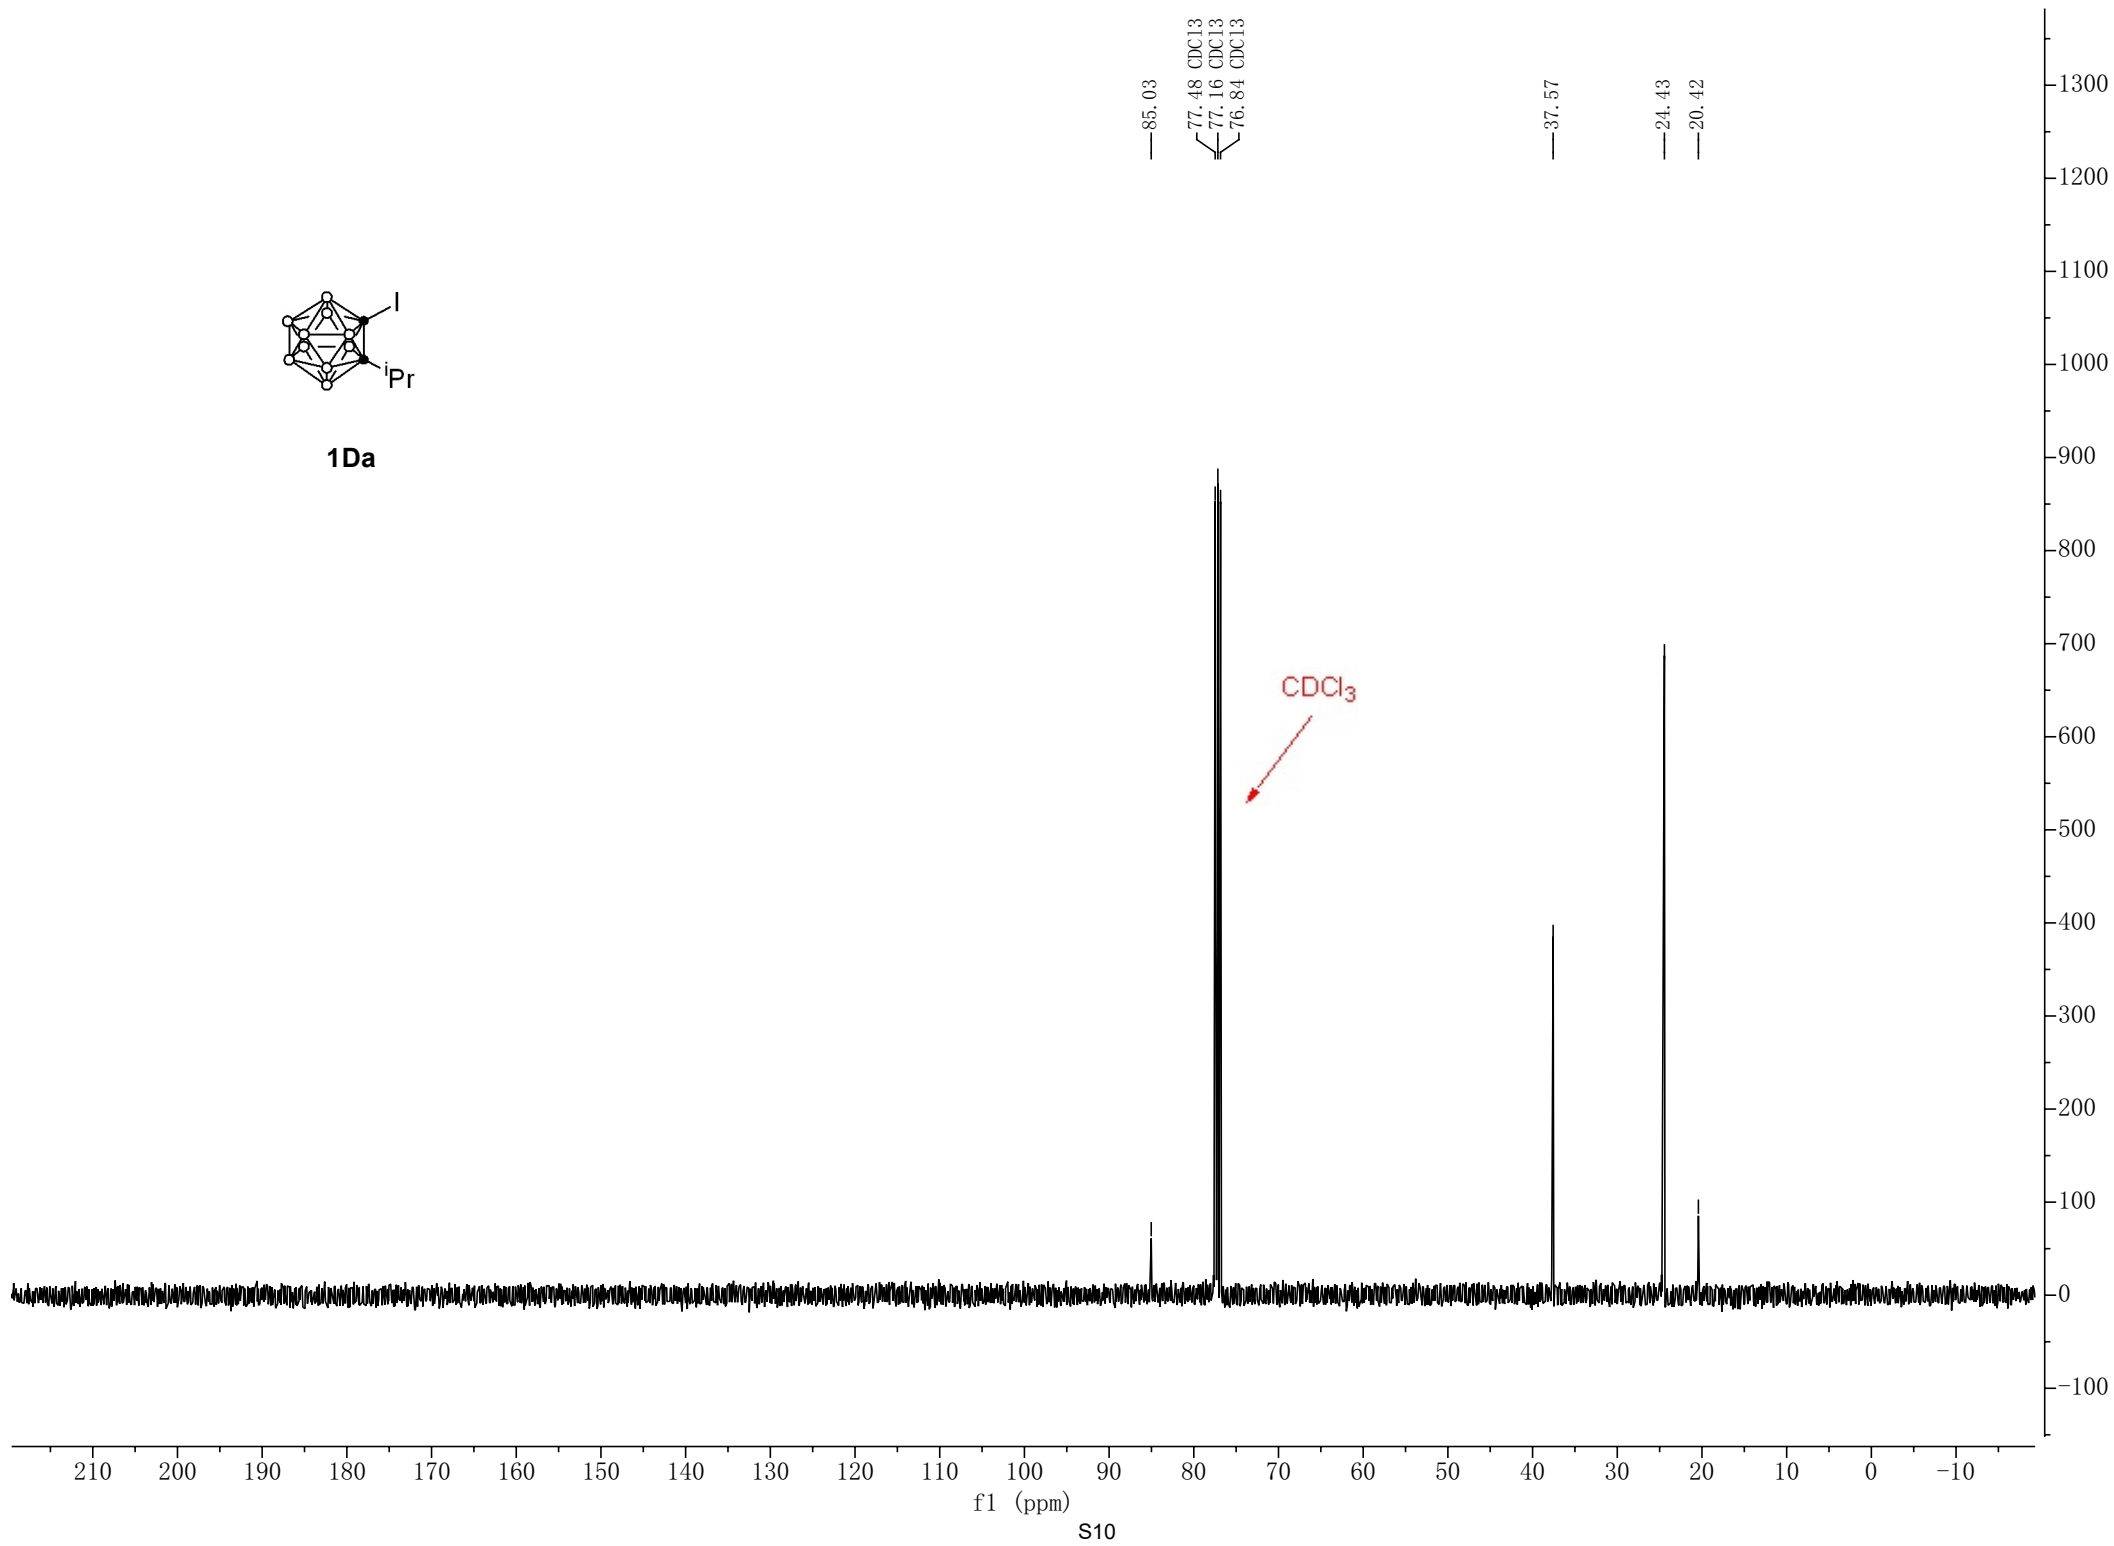

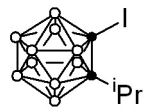

**1Da**

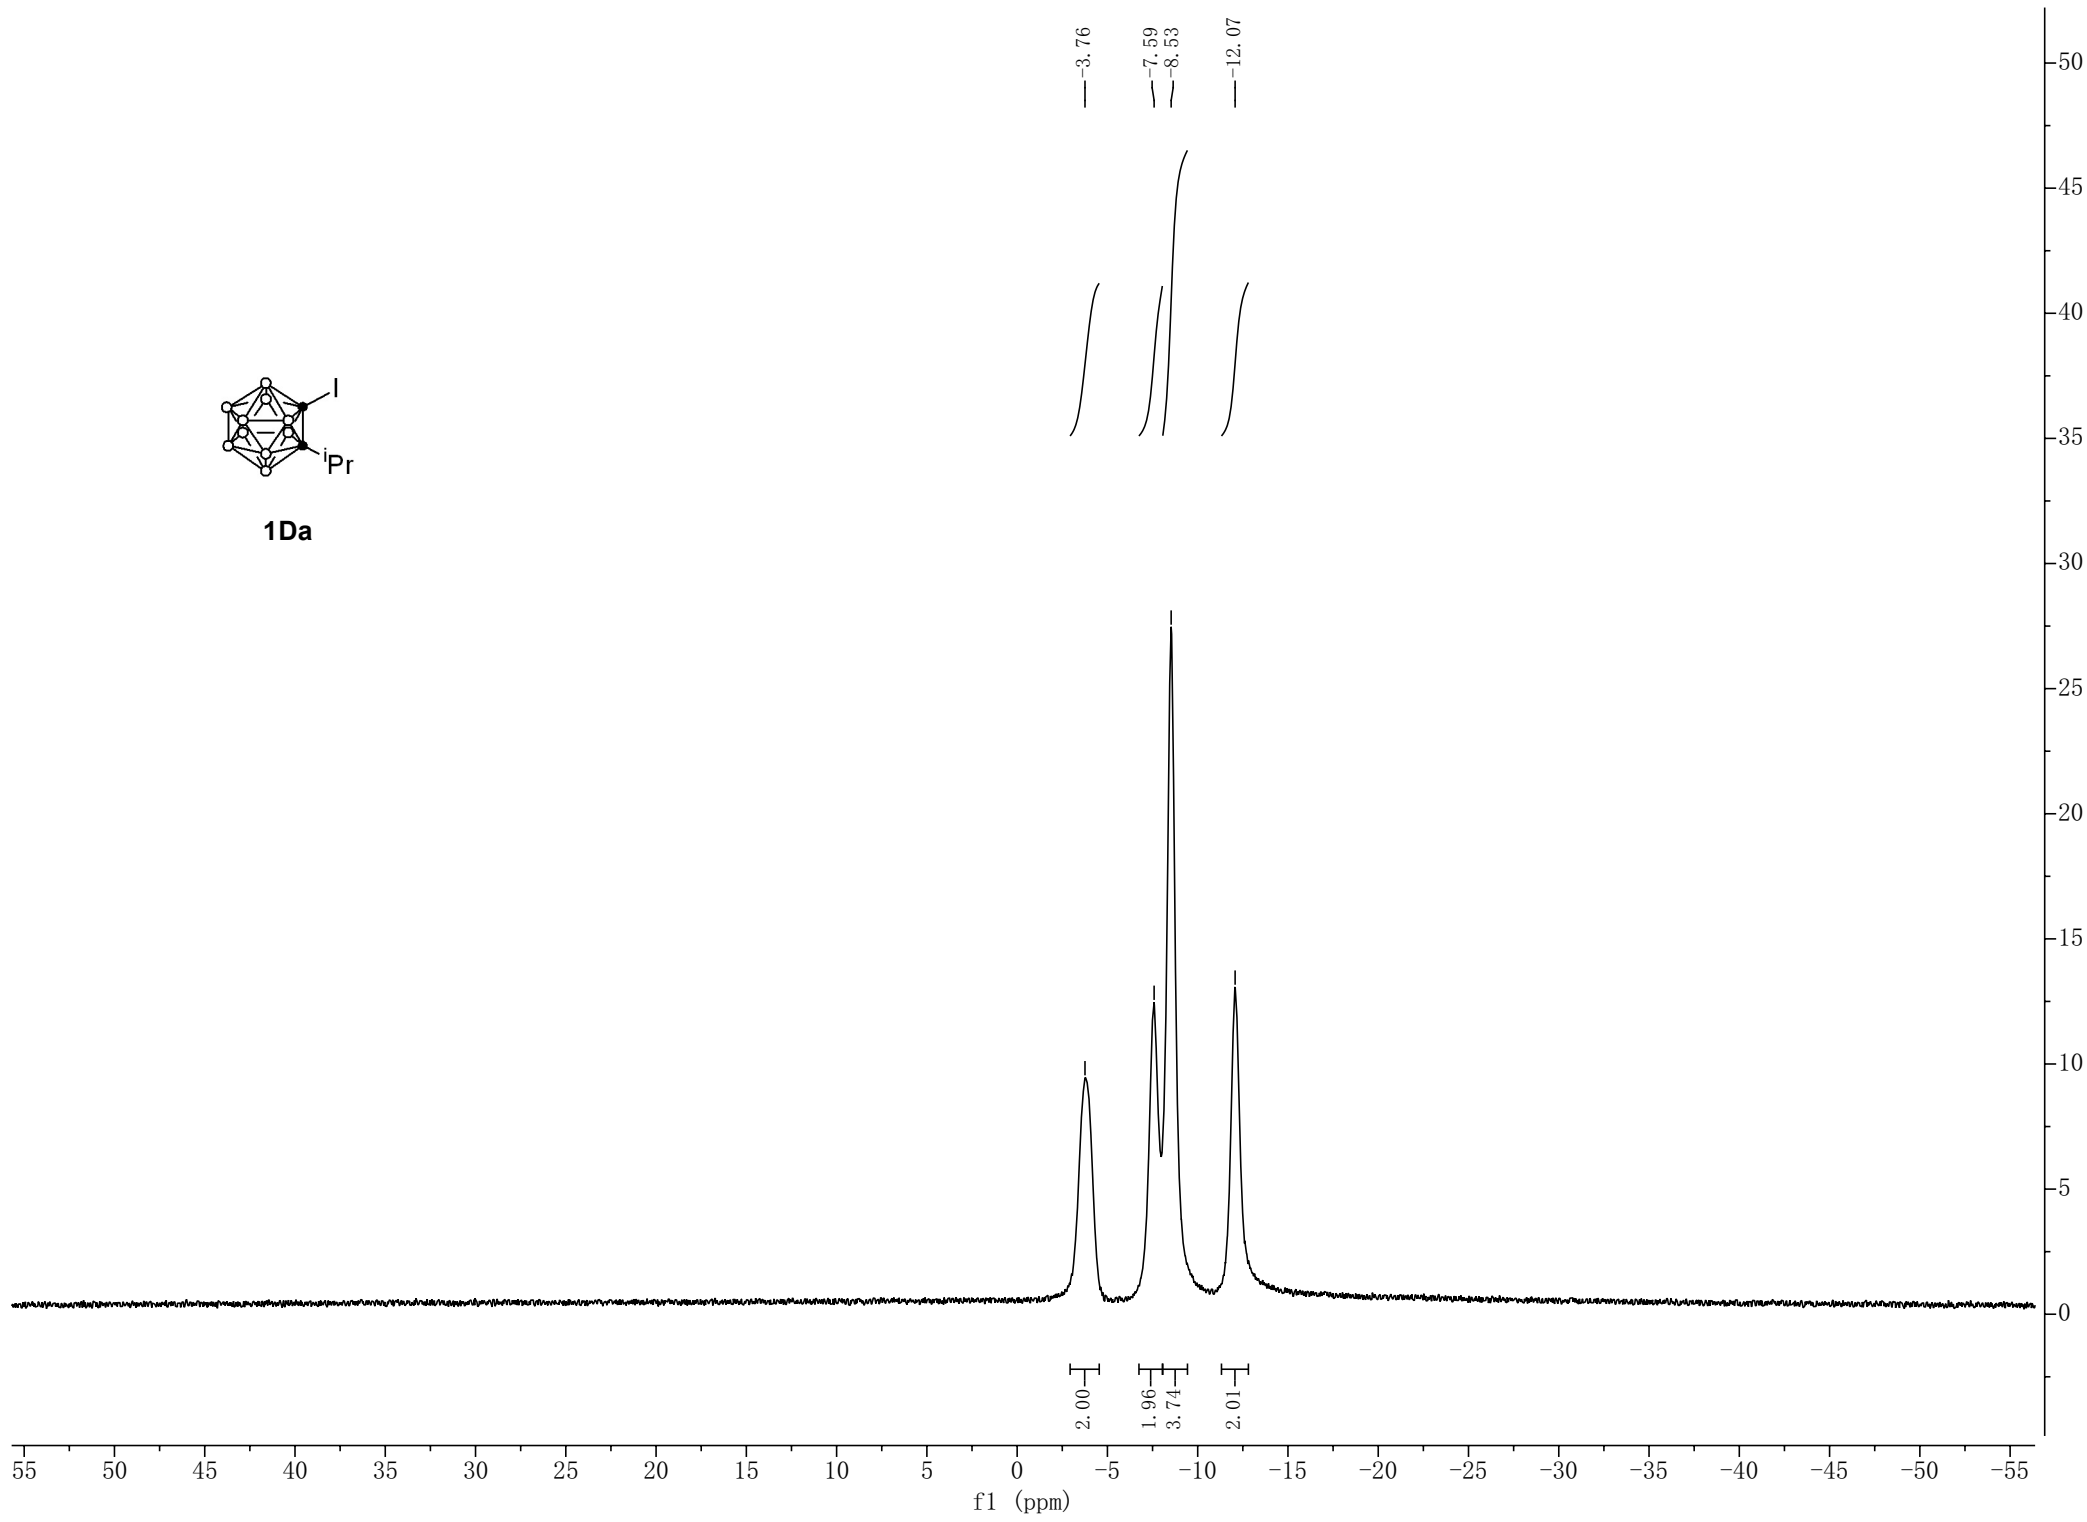

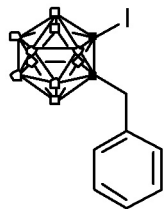

1Ea

7.36  
7.36  
7.35  
7.28  
7.27  
7.26

3.59

1.54

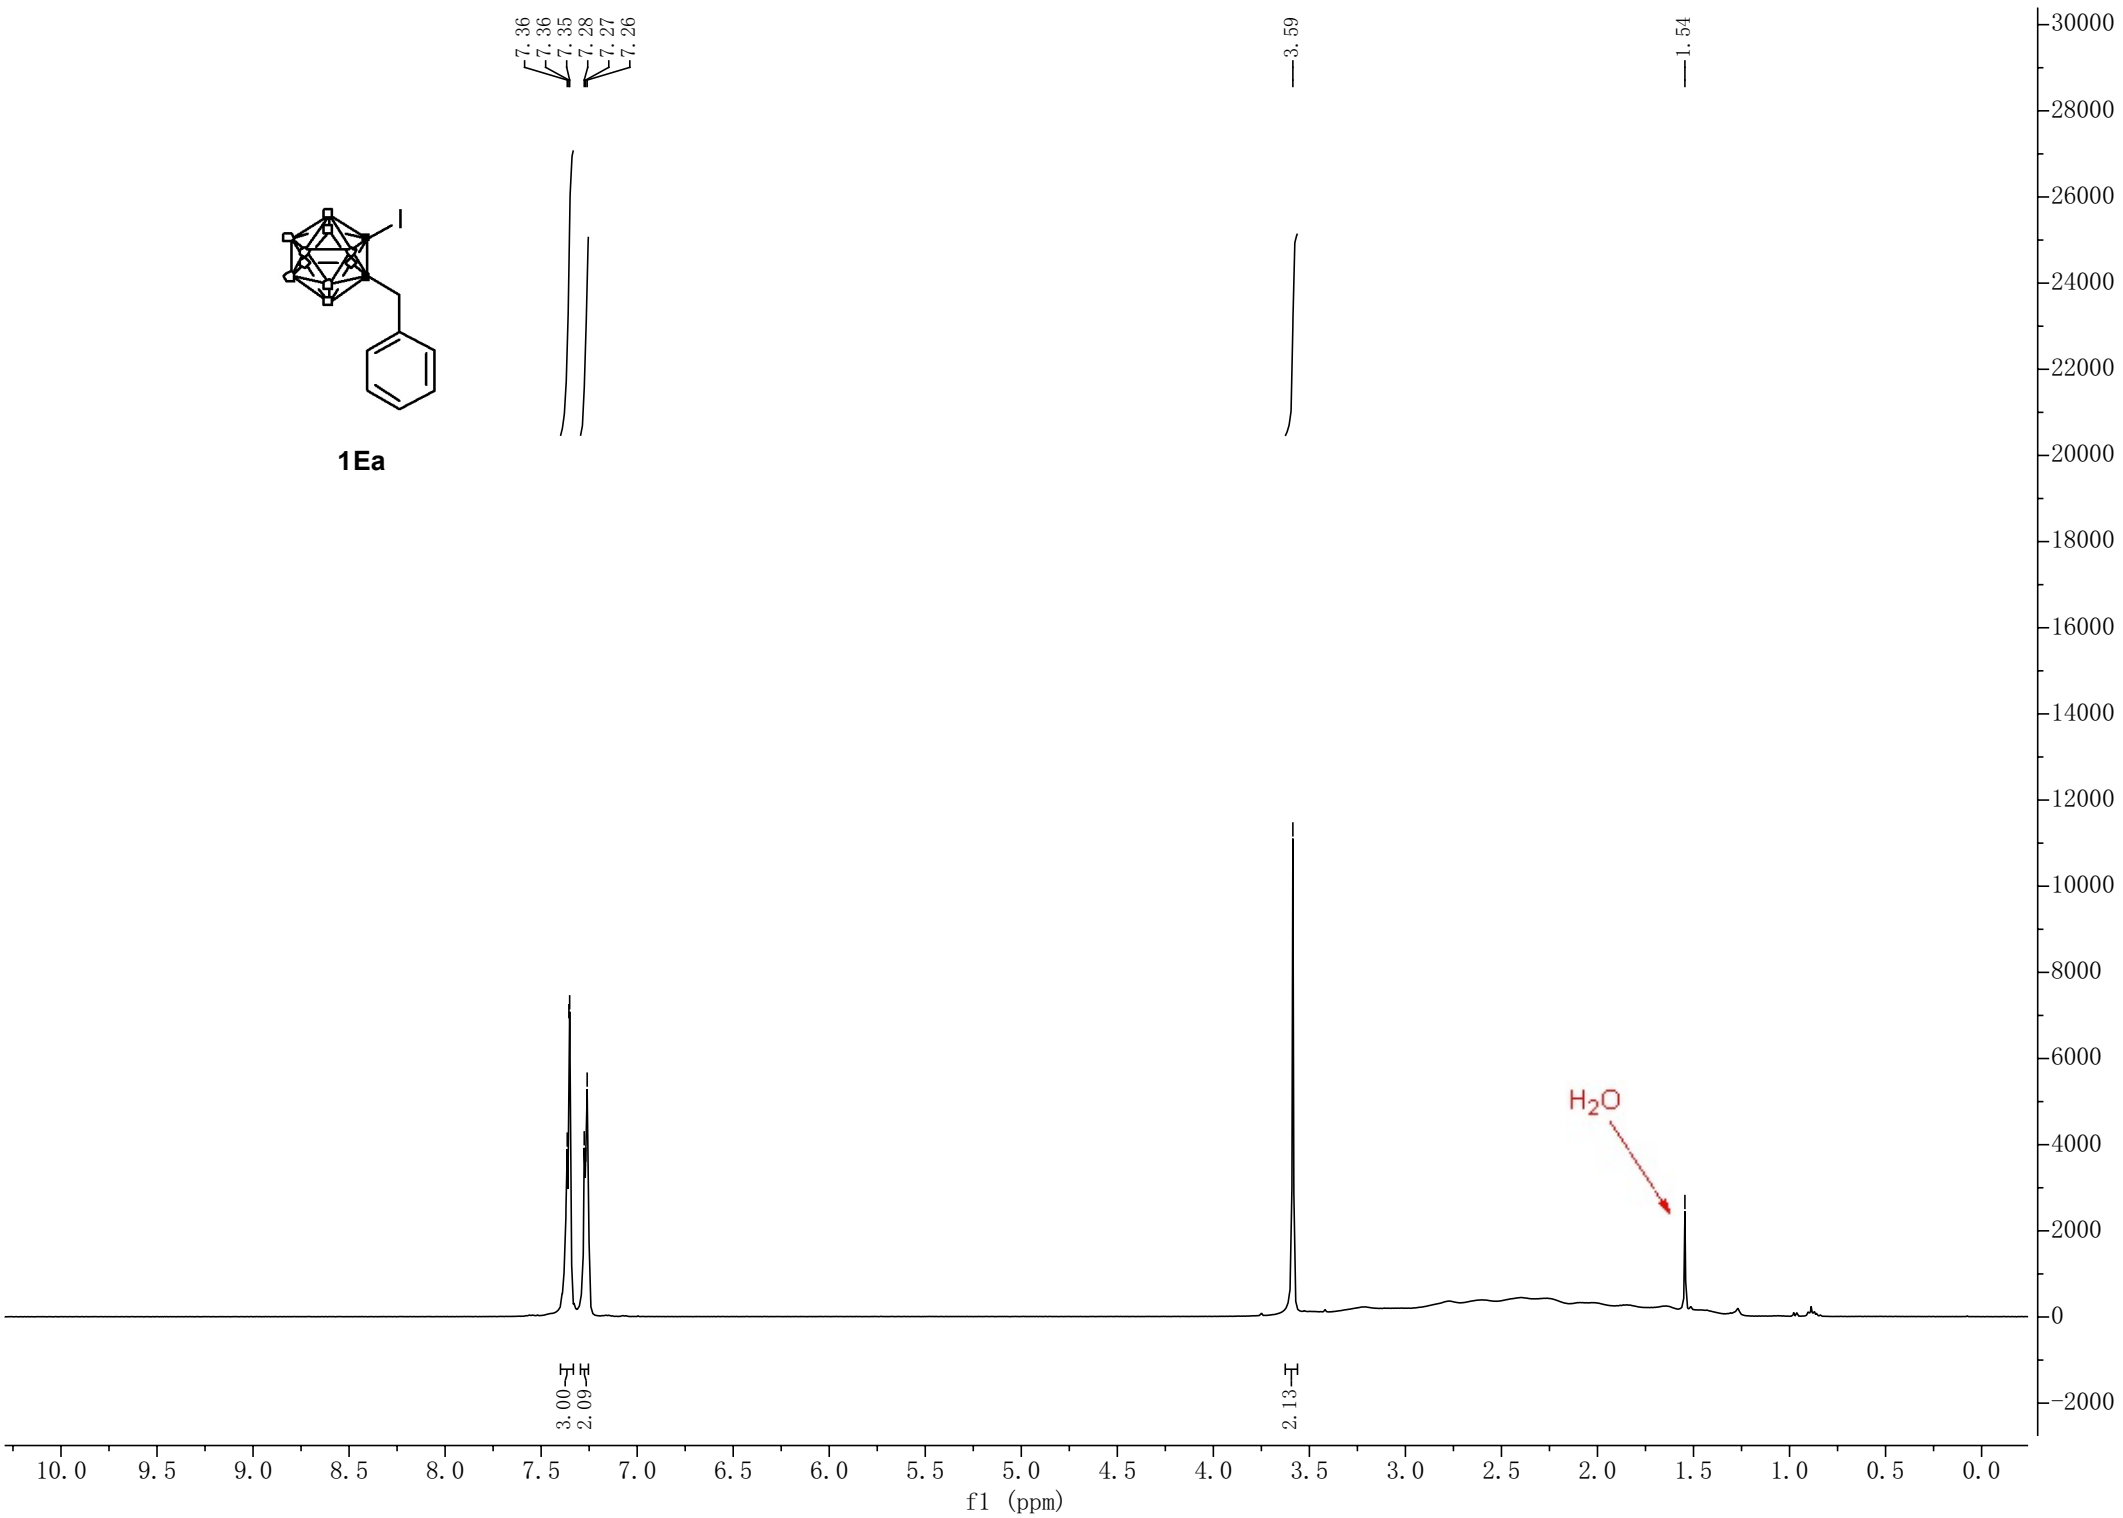

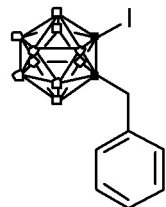

1Ea

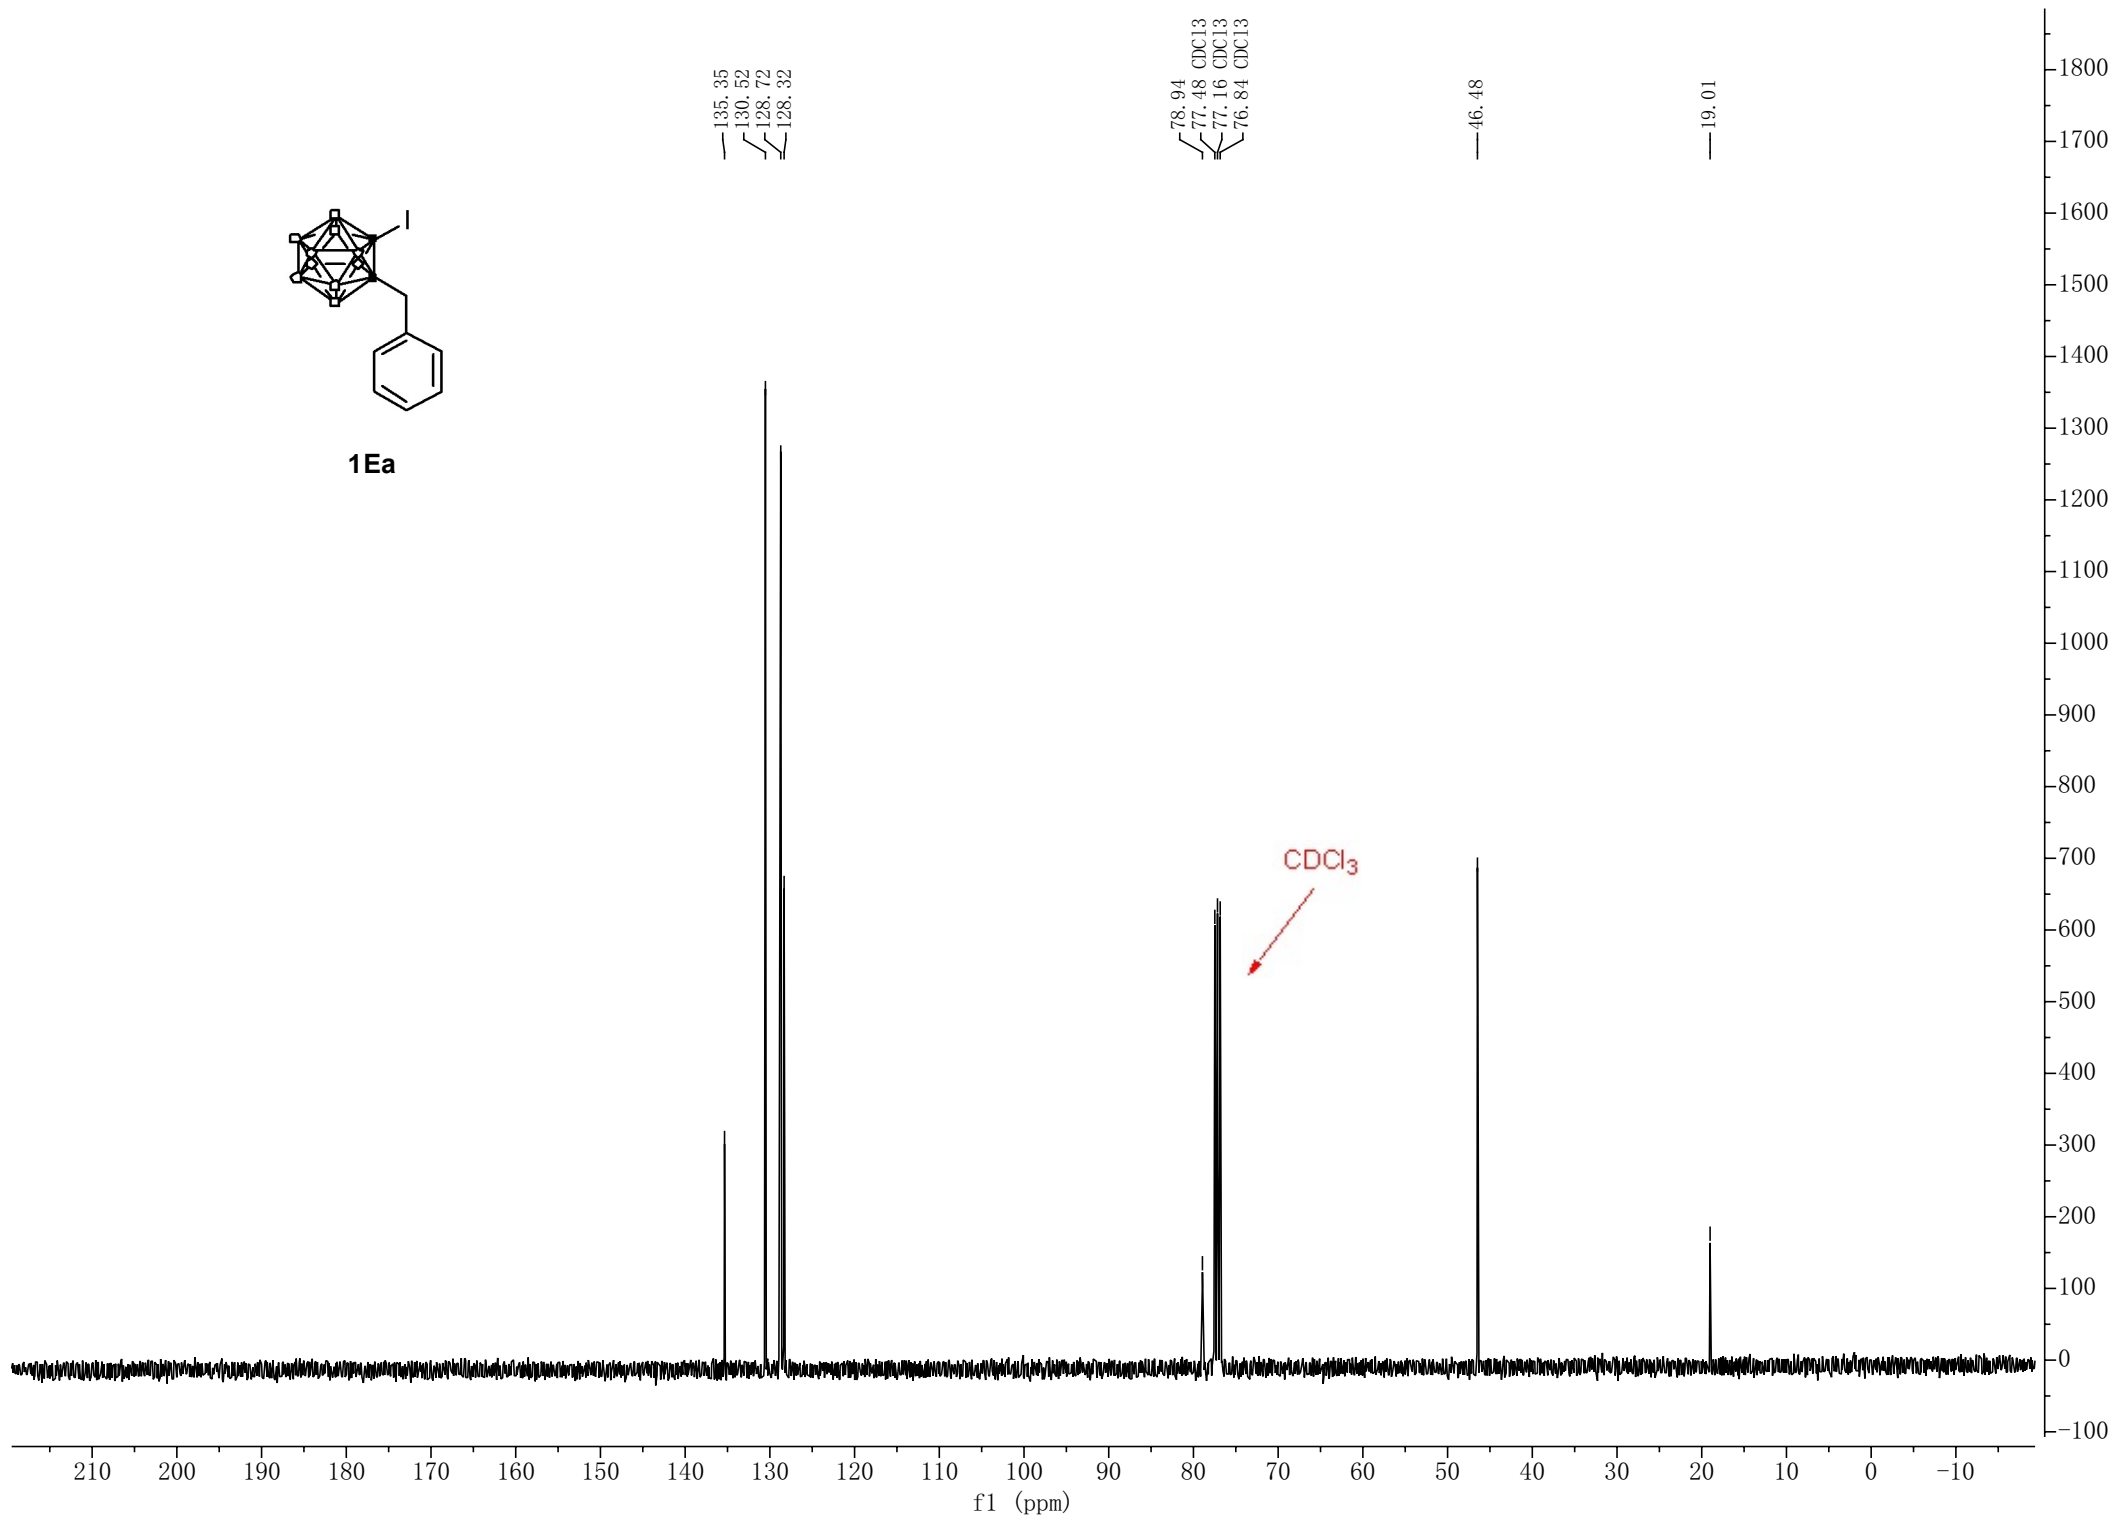

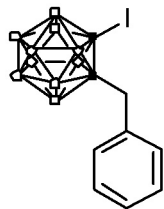

**1Ea**

— 3.99  
— 7.53  
— 8.39  
— 11.19

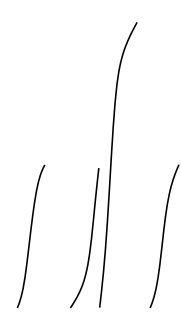

2.00  
1.96  
4.00  
2.01

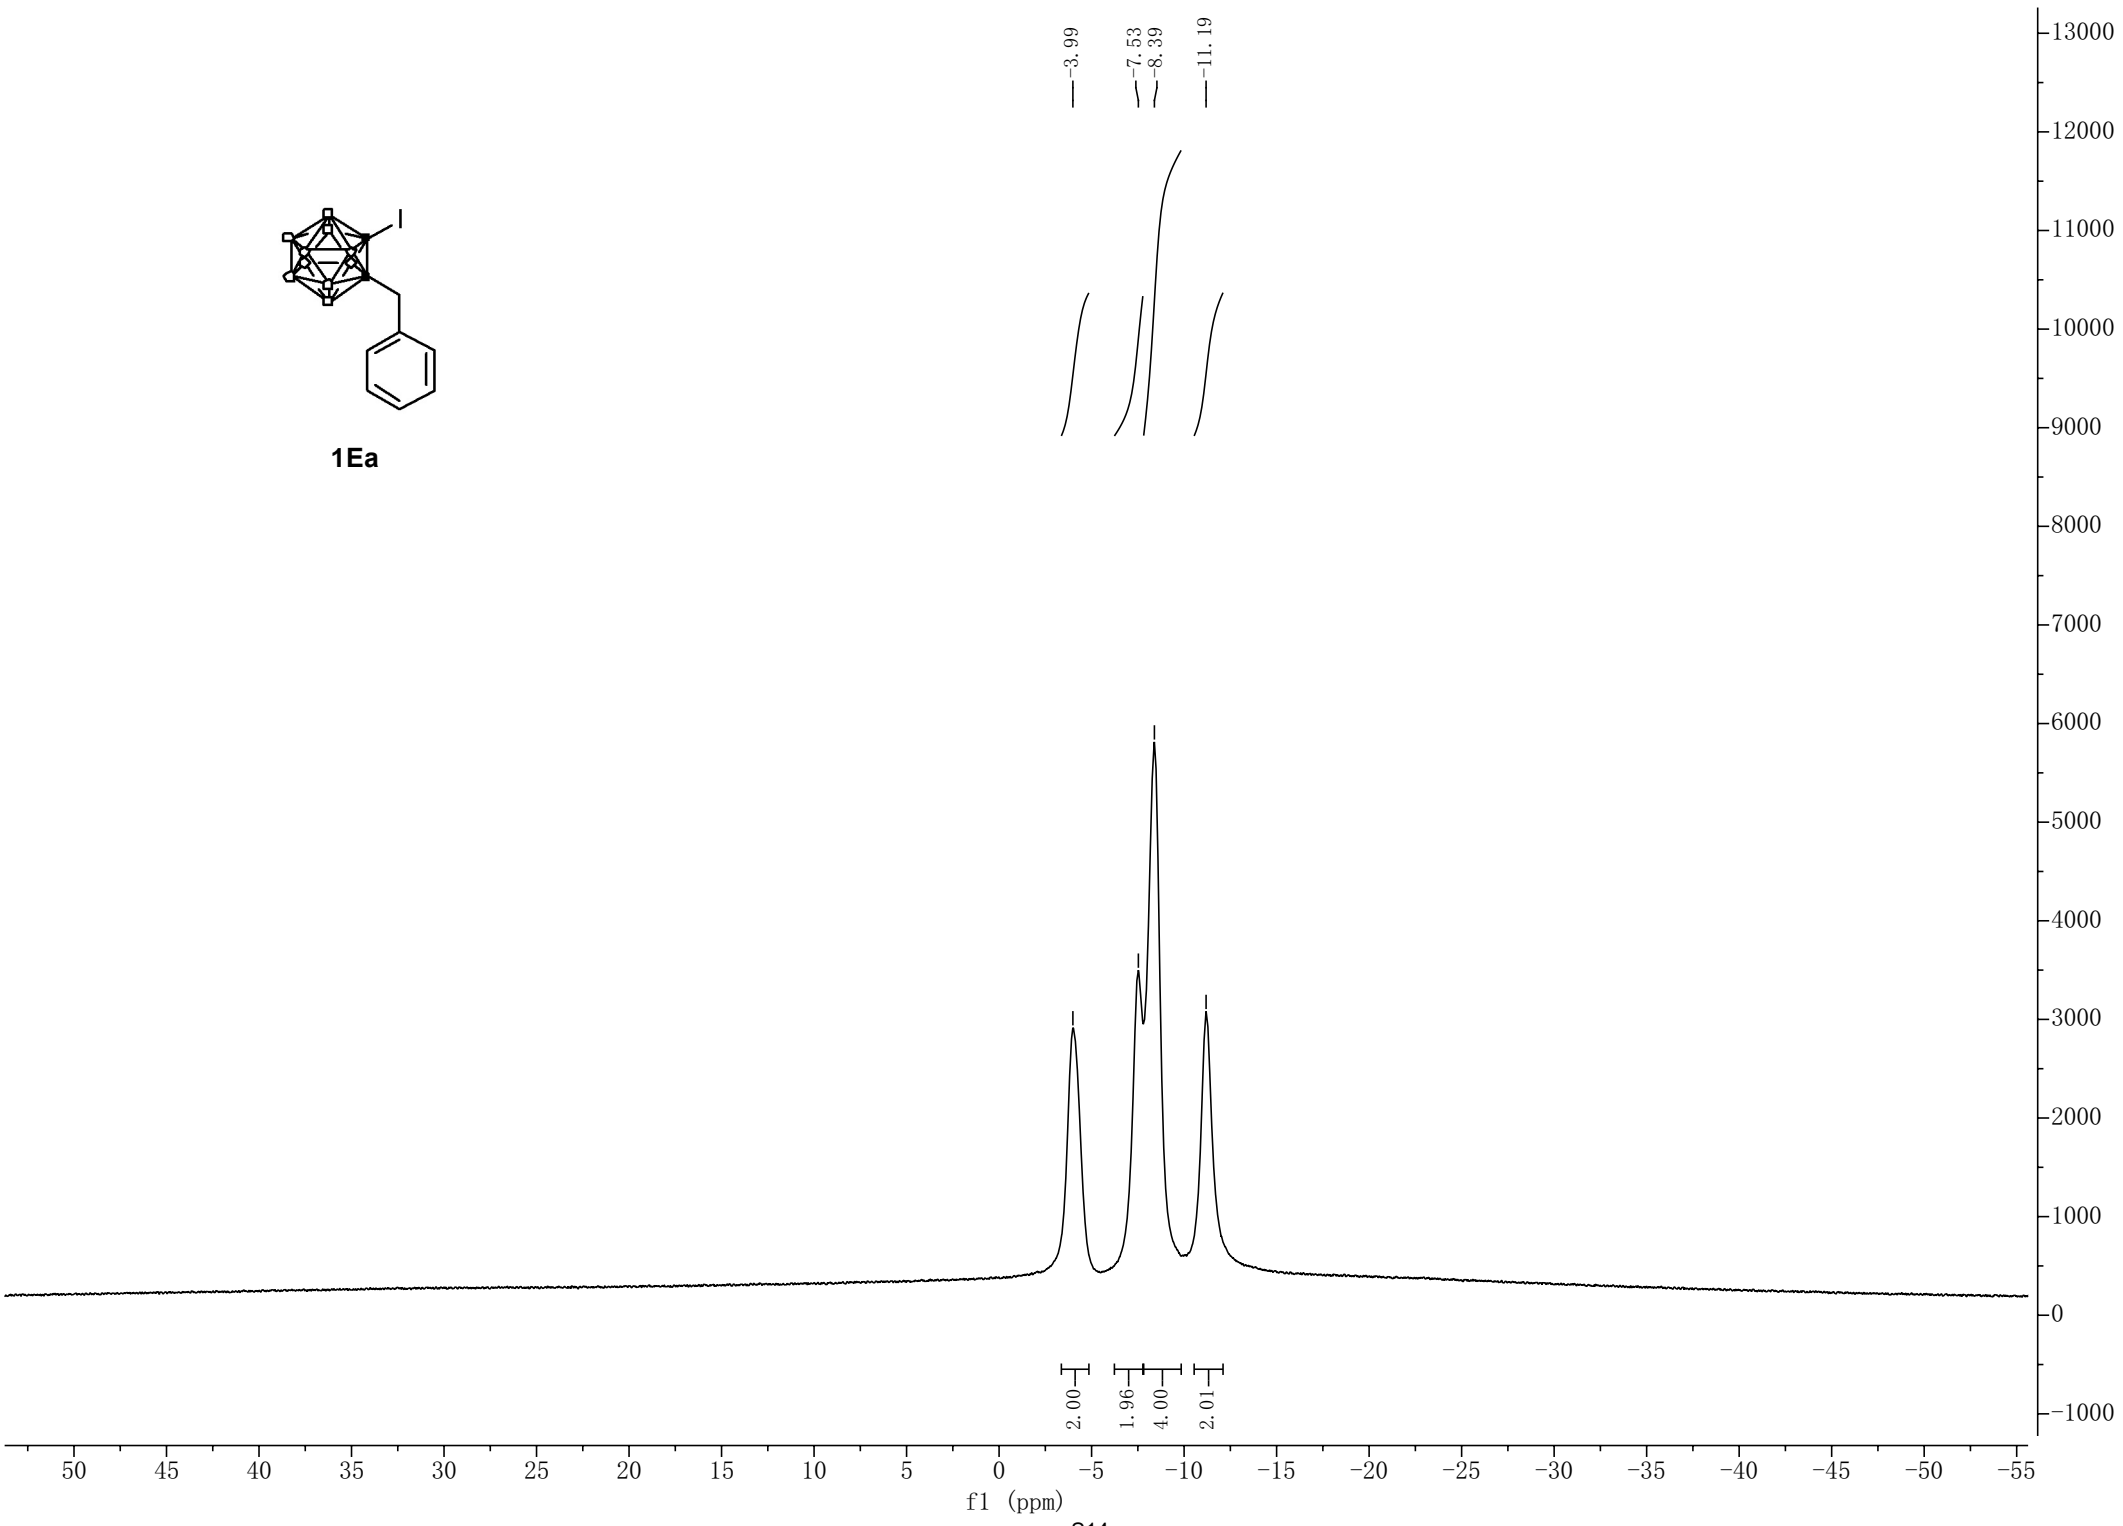

f1 (ppm)

S14

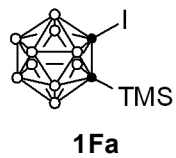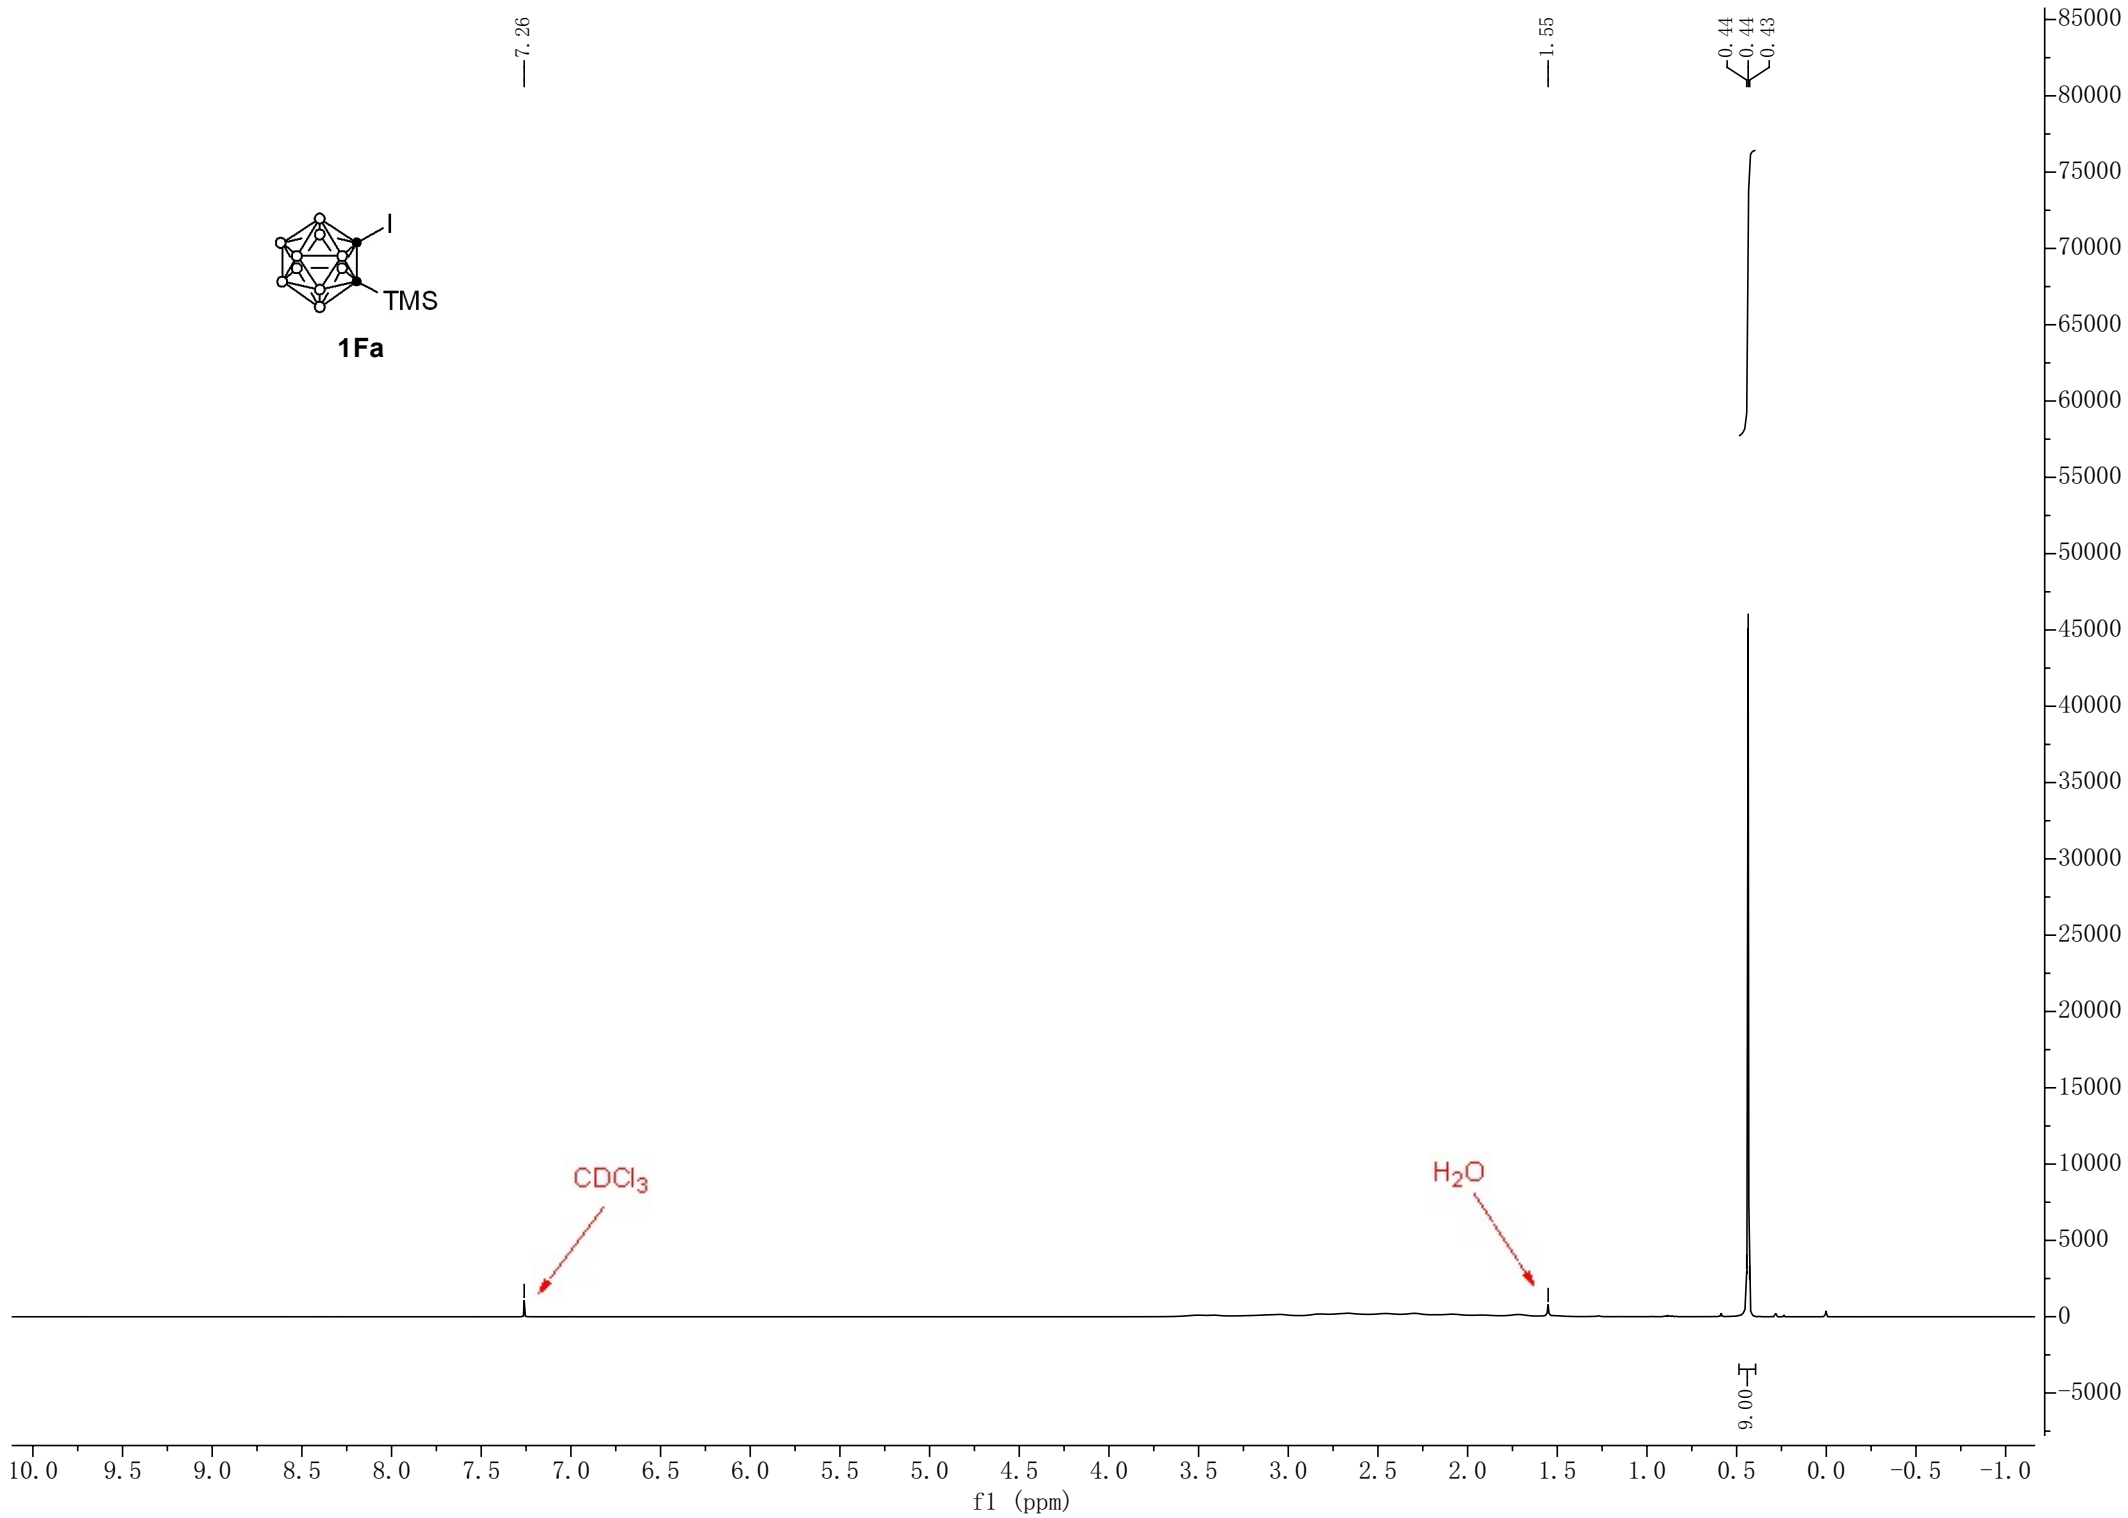

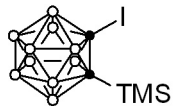

1Fa

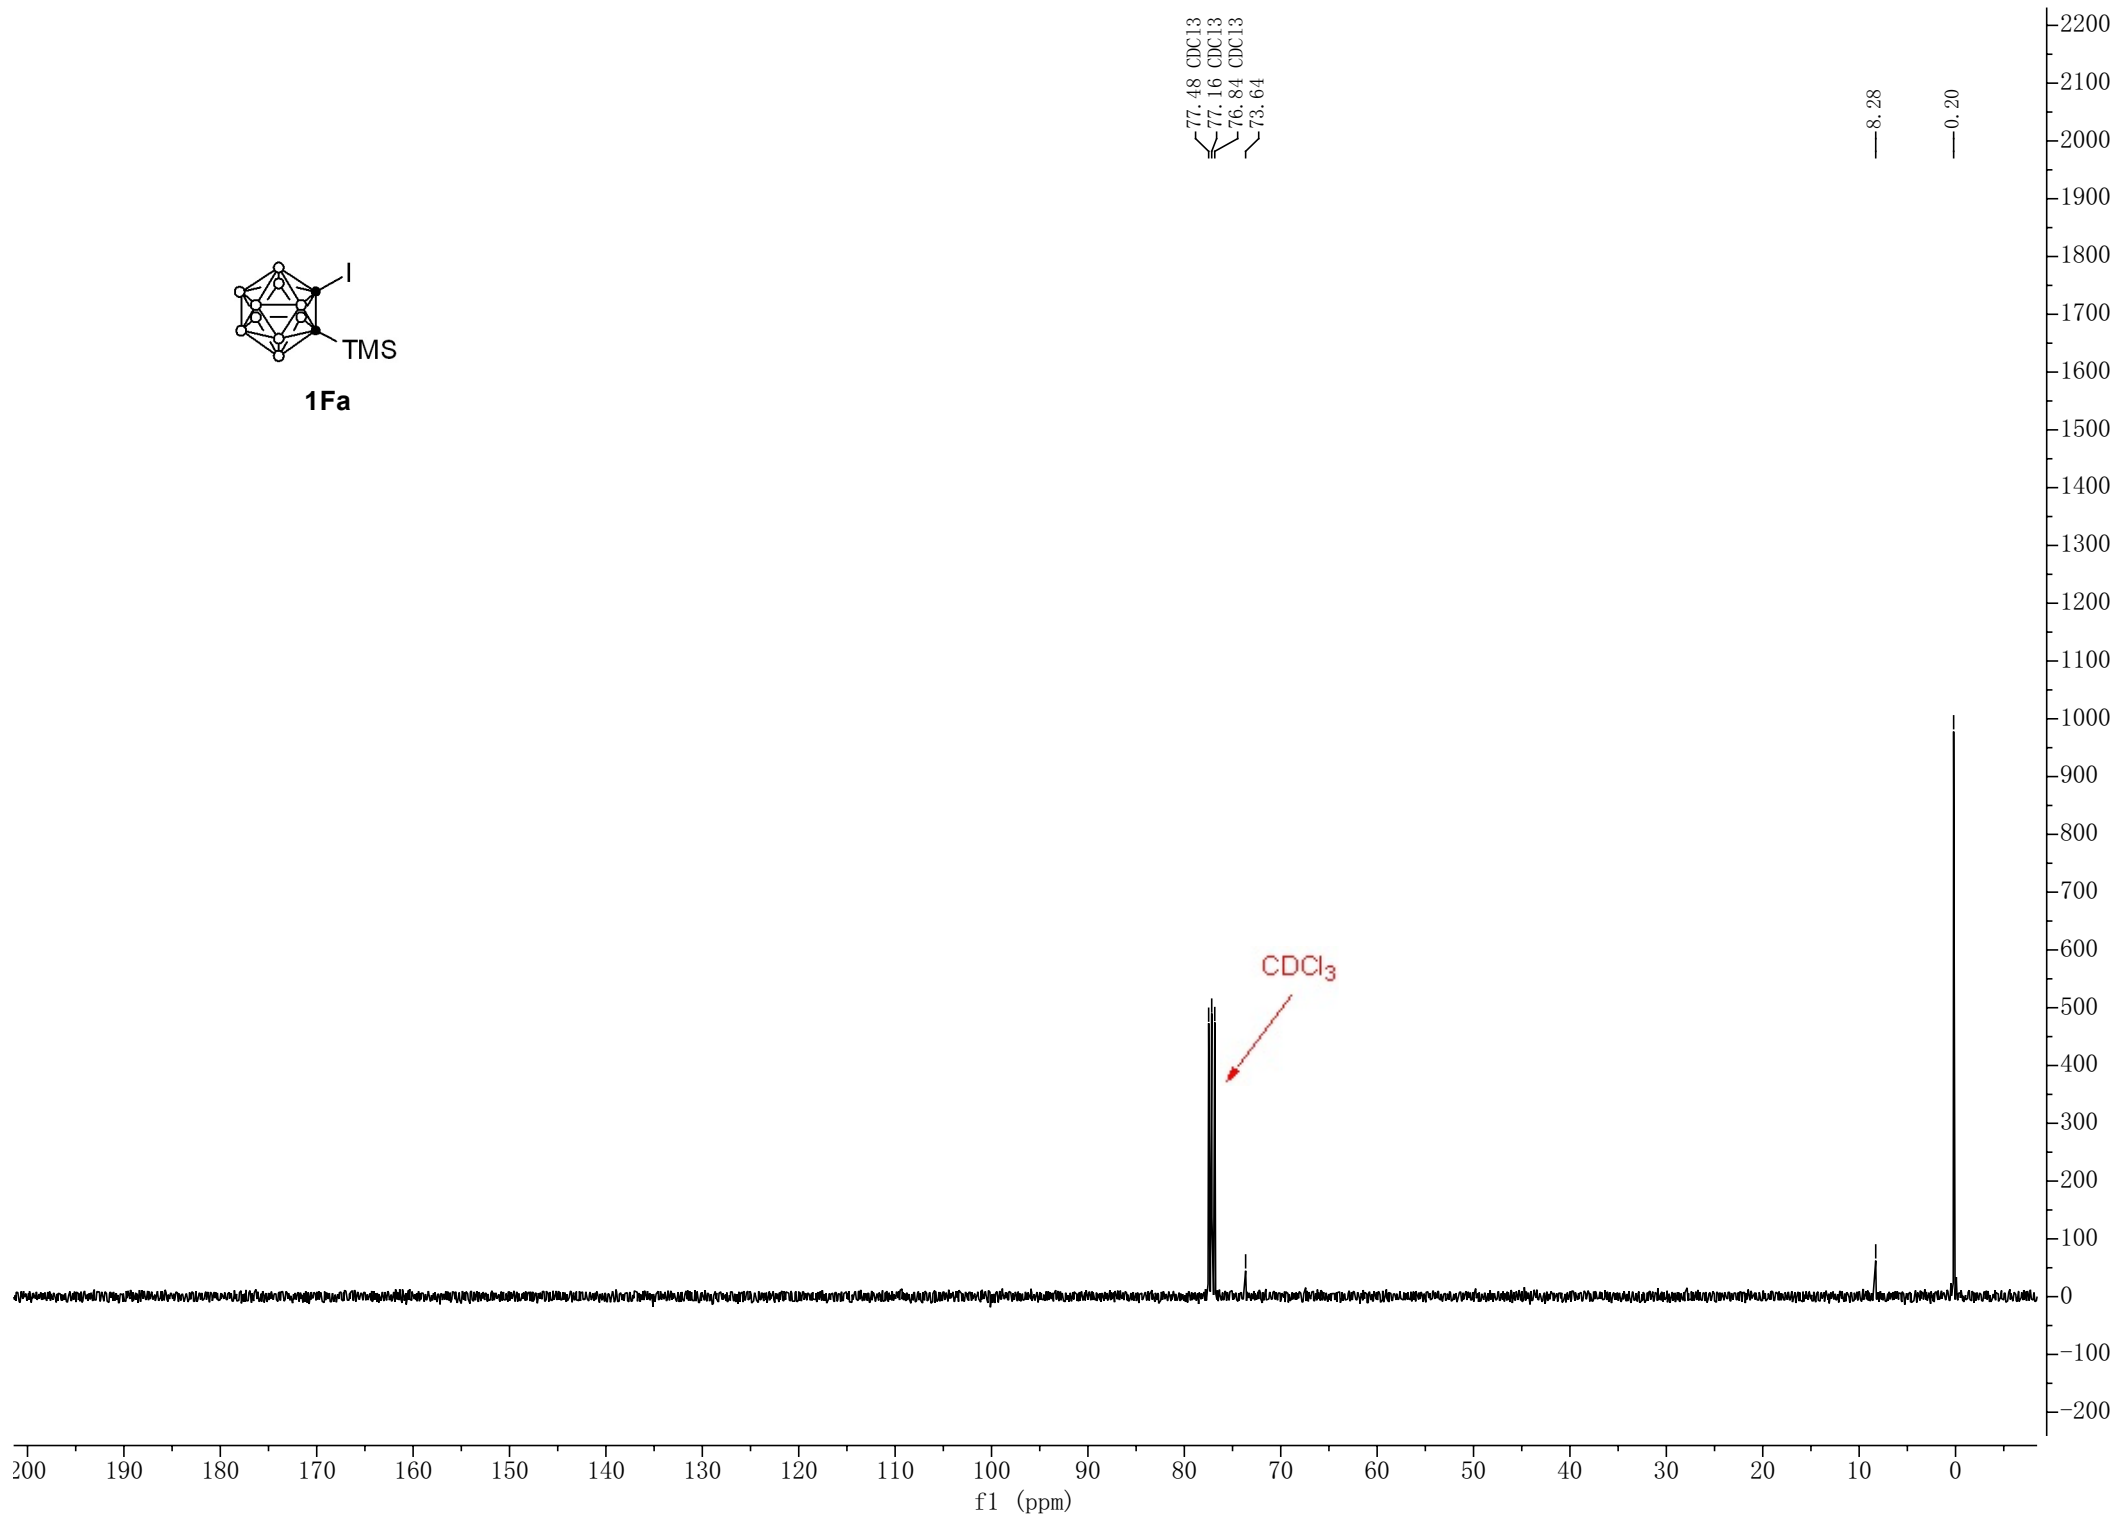



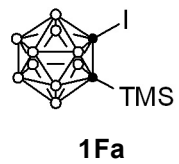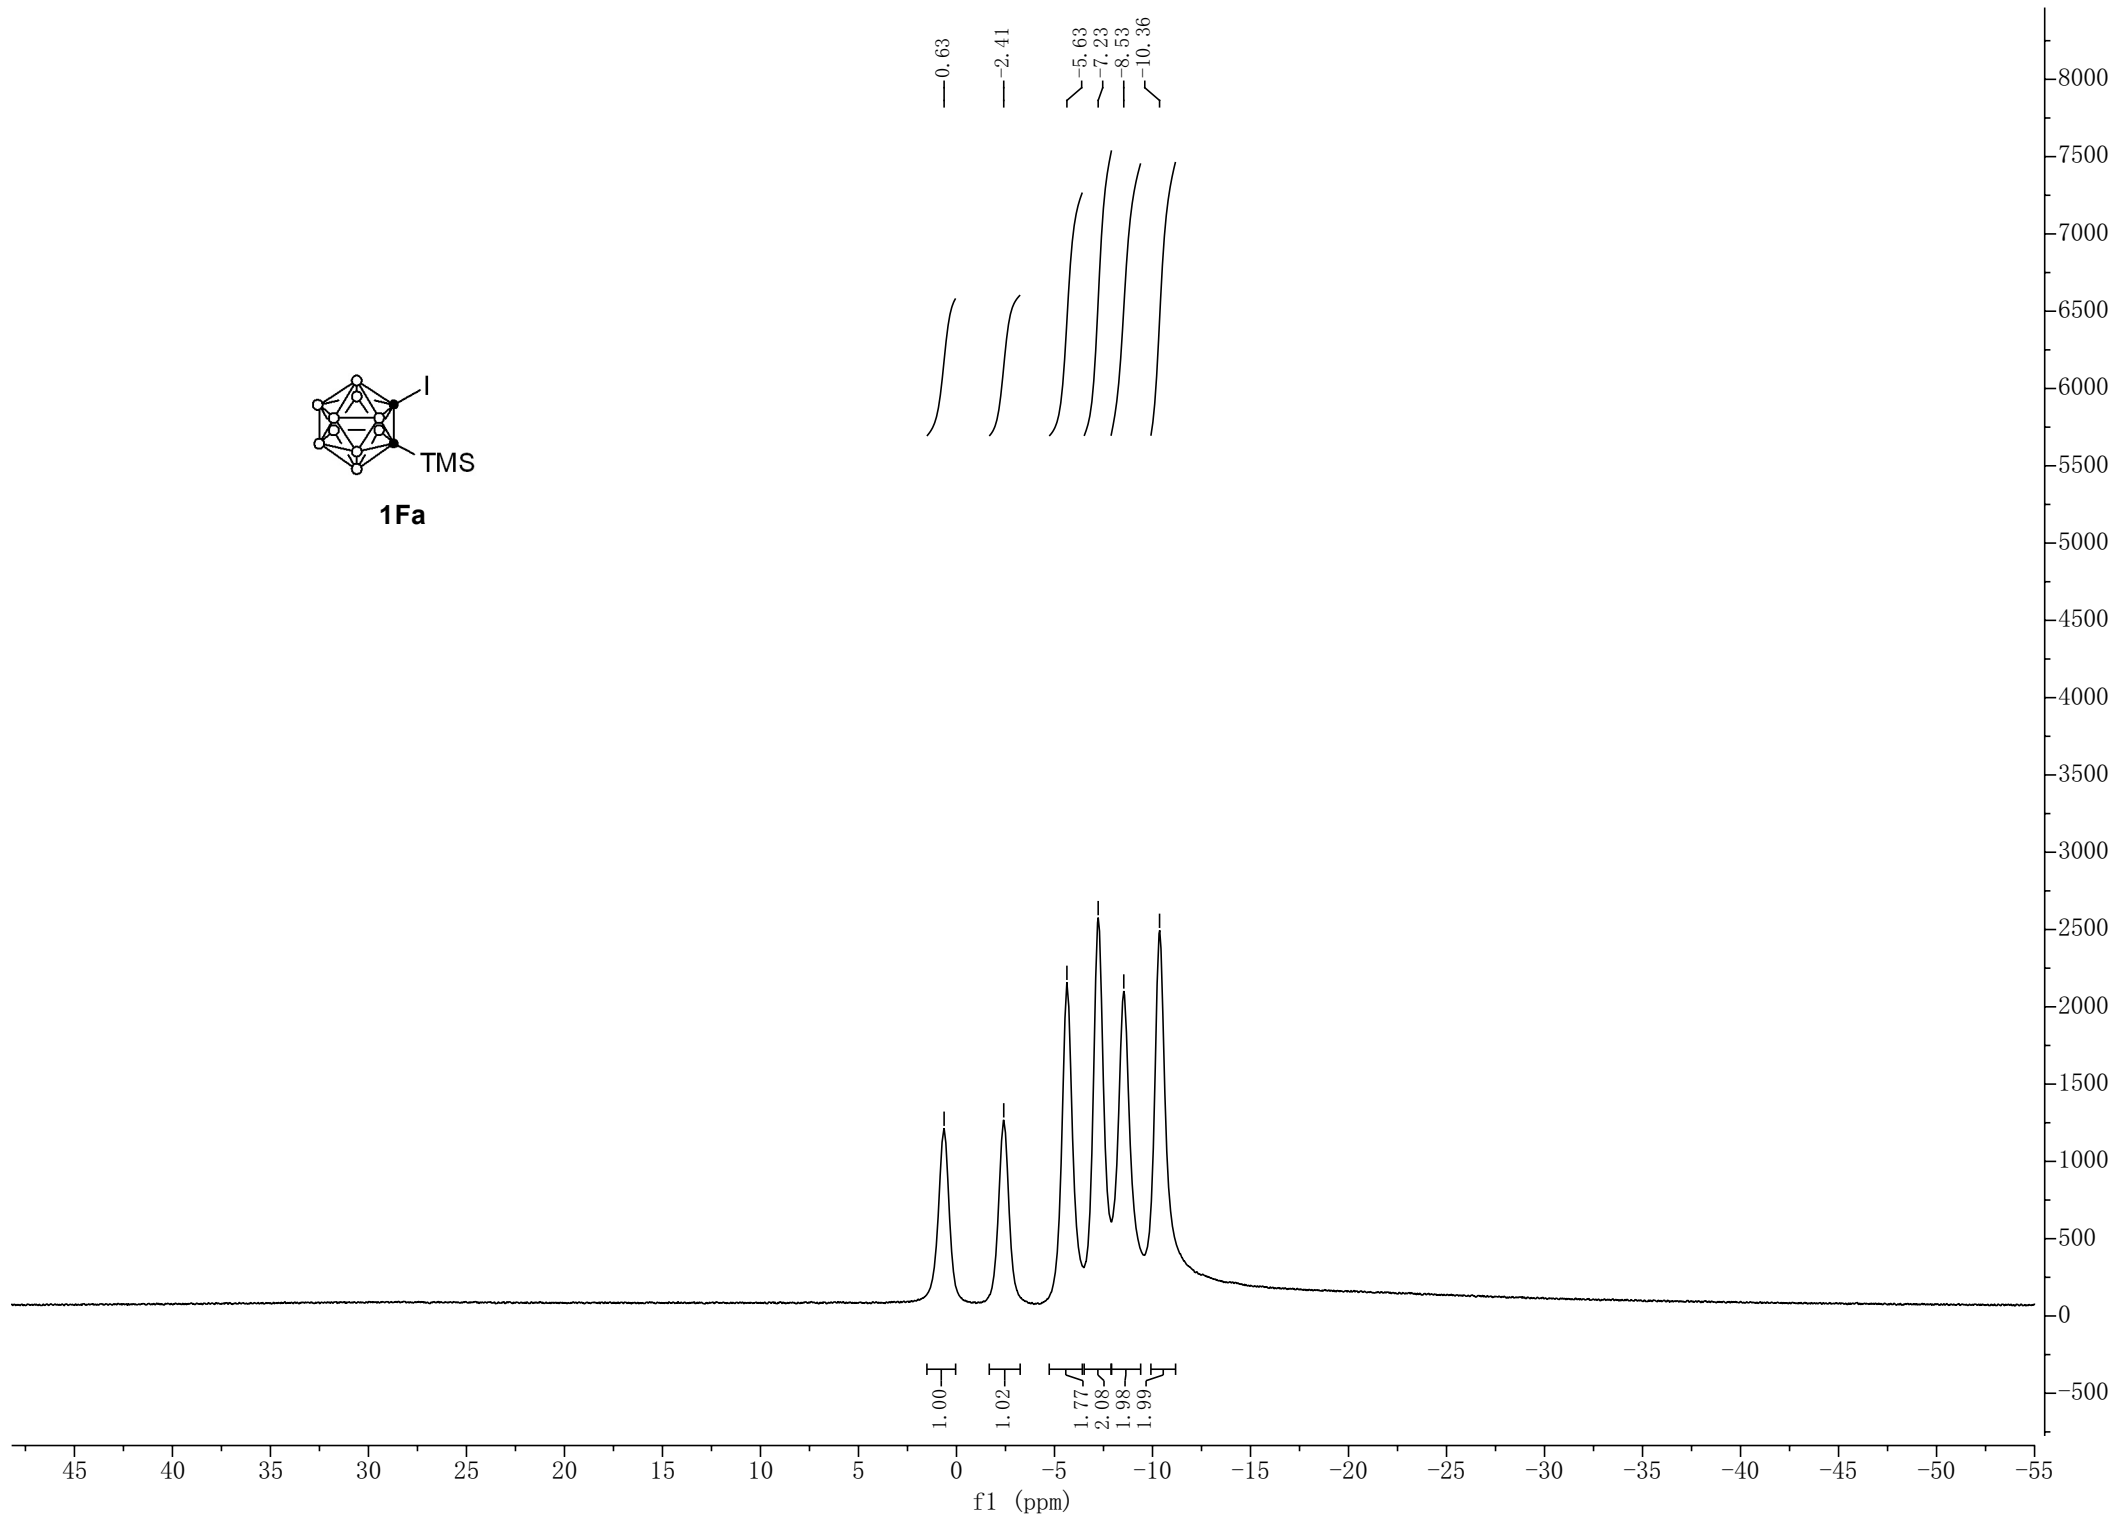

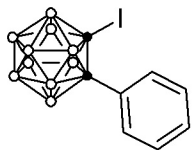

1Ga

7.66  
7.64  
7.54  
7.52  
7.50  
7.45  
7.44  
7.42  
7.26

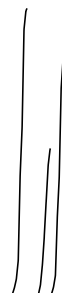

1.57

H<sub>2</sub>O

CDCl<sub>3</sub>

1.96  
1.00  
1.89

10.5 10.0 9.5 9.0 8.5 8.0 7.5 7.0 6.5 6.0 5.5 5.0 4.5 4.0 3.5 3.0 2.5 2.0 1.5 1.0 0.5 0.0

f1 (ppm)

S18

3400  
3200  
3000  
2800  
2600  
2400  
2200  
2000  
1800  
1600  
1400  
1200  
1000  
800  
600  
400  
200  
0  
-200

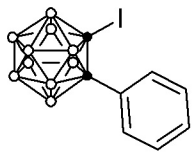

1Ga

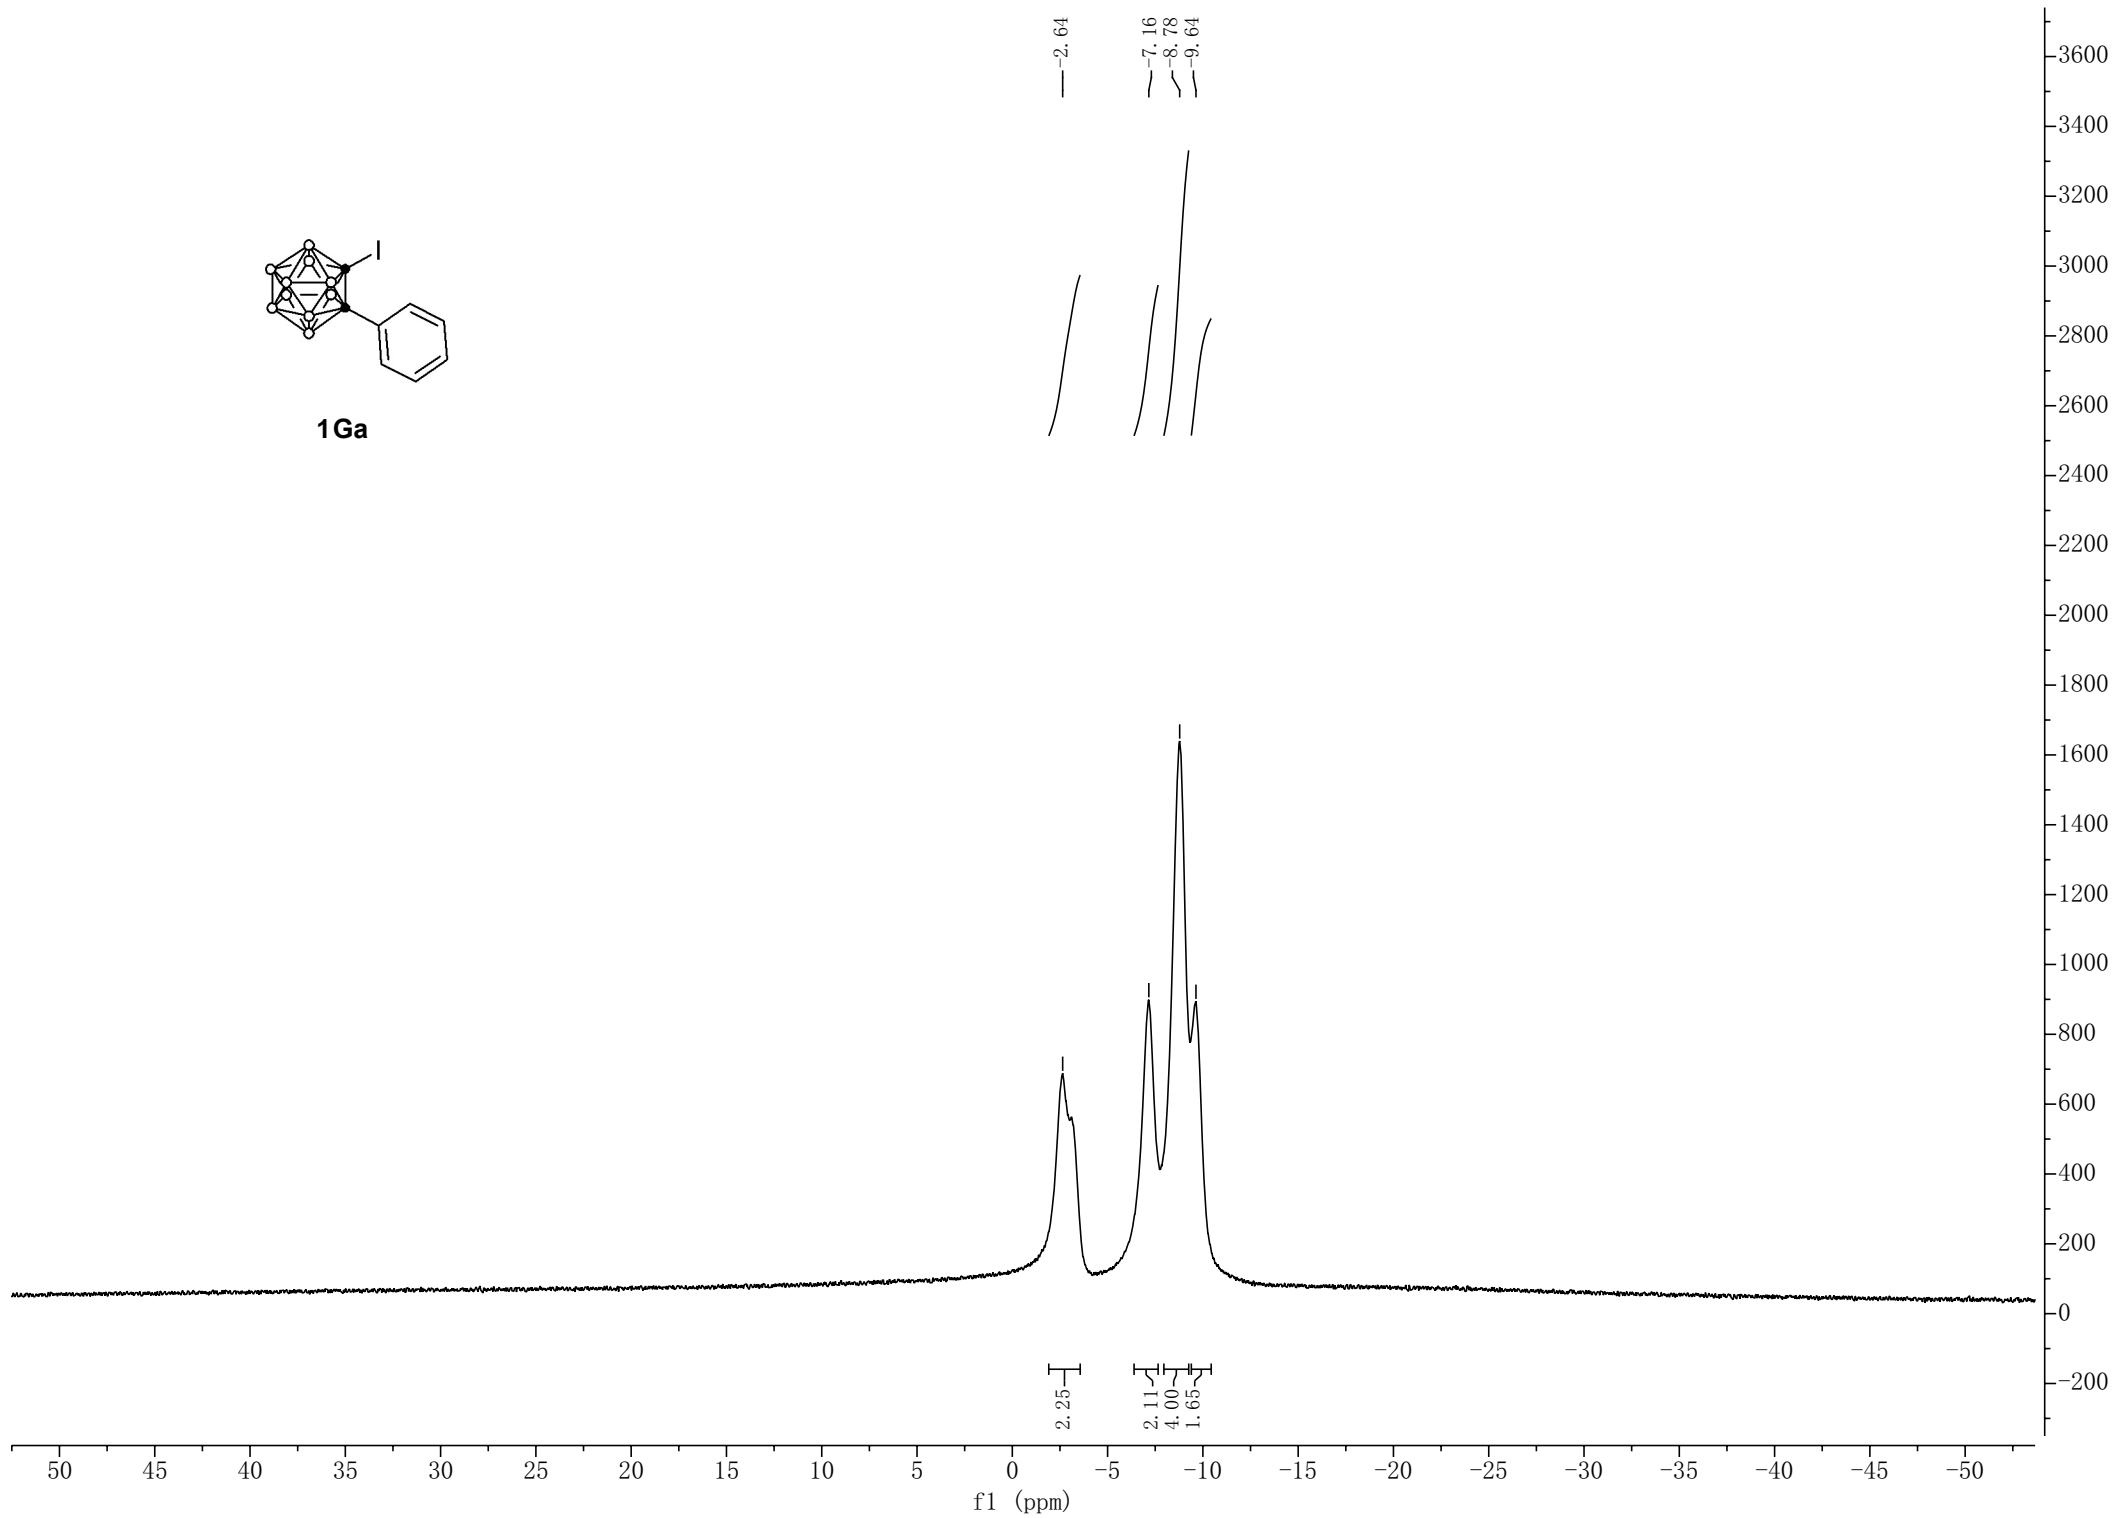

-2.64  
-7.16  
-8.78  
-9.64

2.25  
2.11  
4.00  
1.65

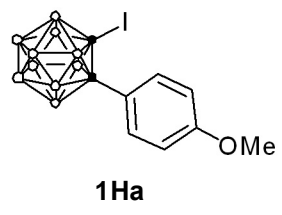

7.57  
7.55  
7.26  
6.92  
6.90

3.86

1.55

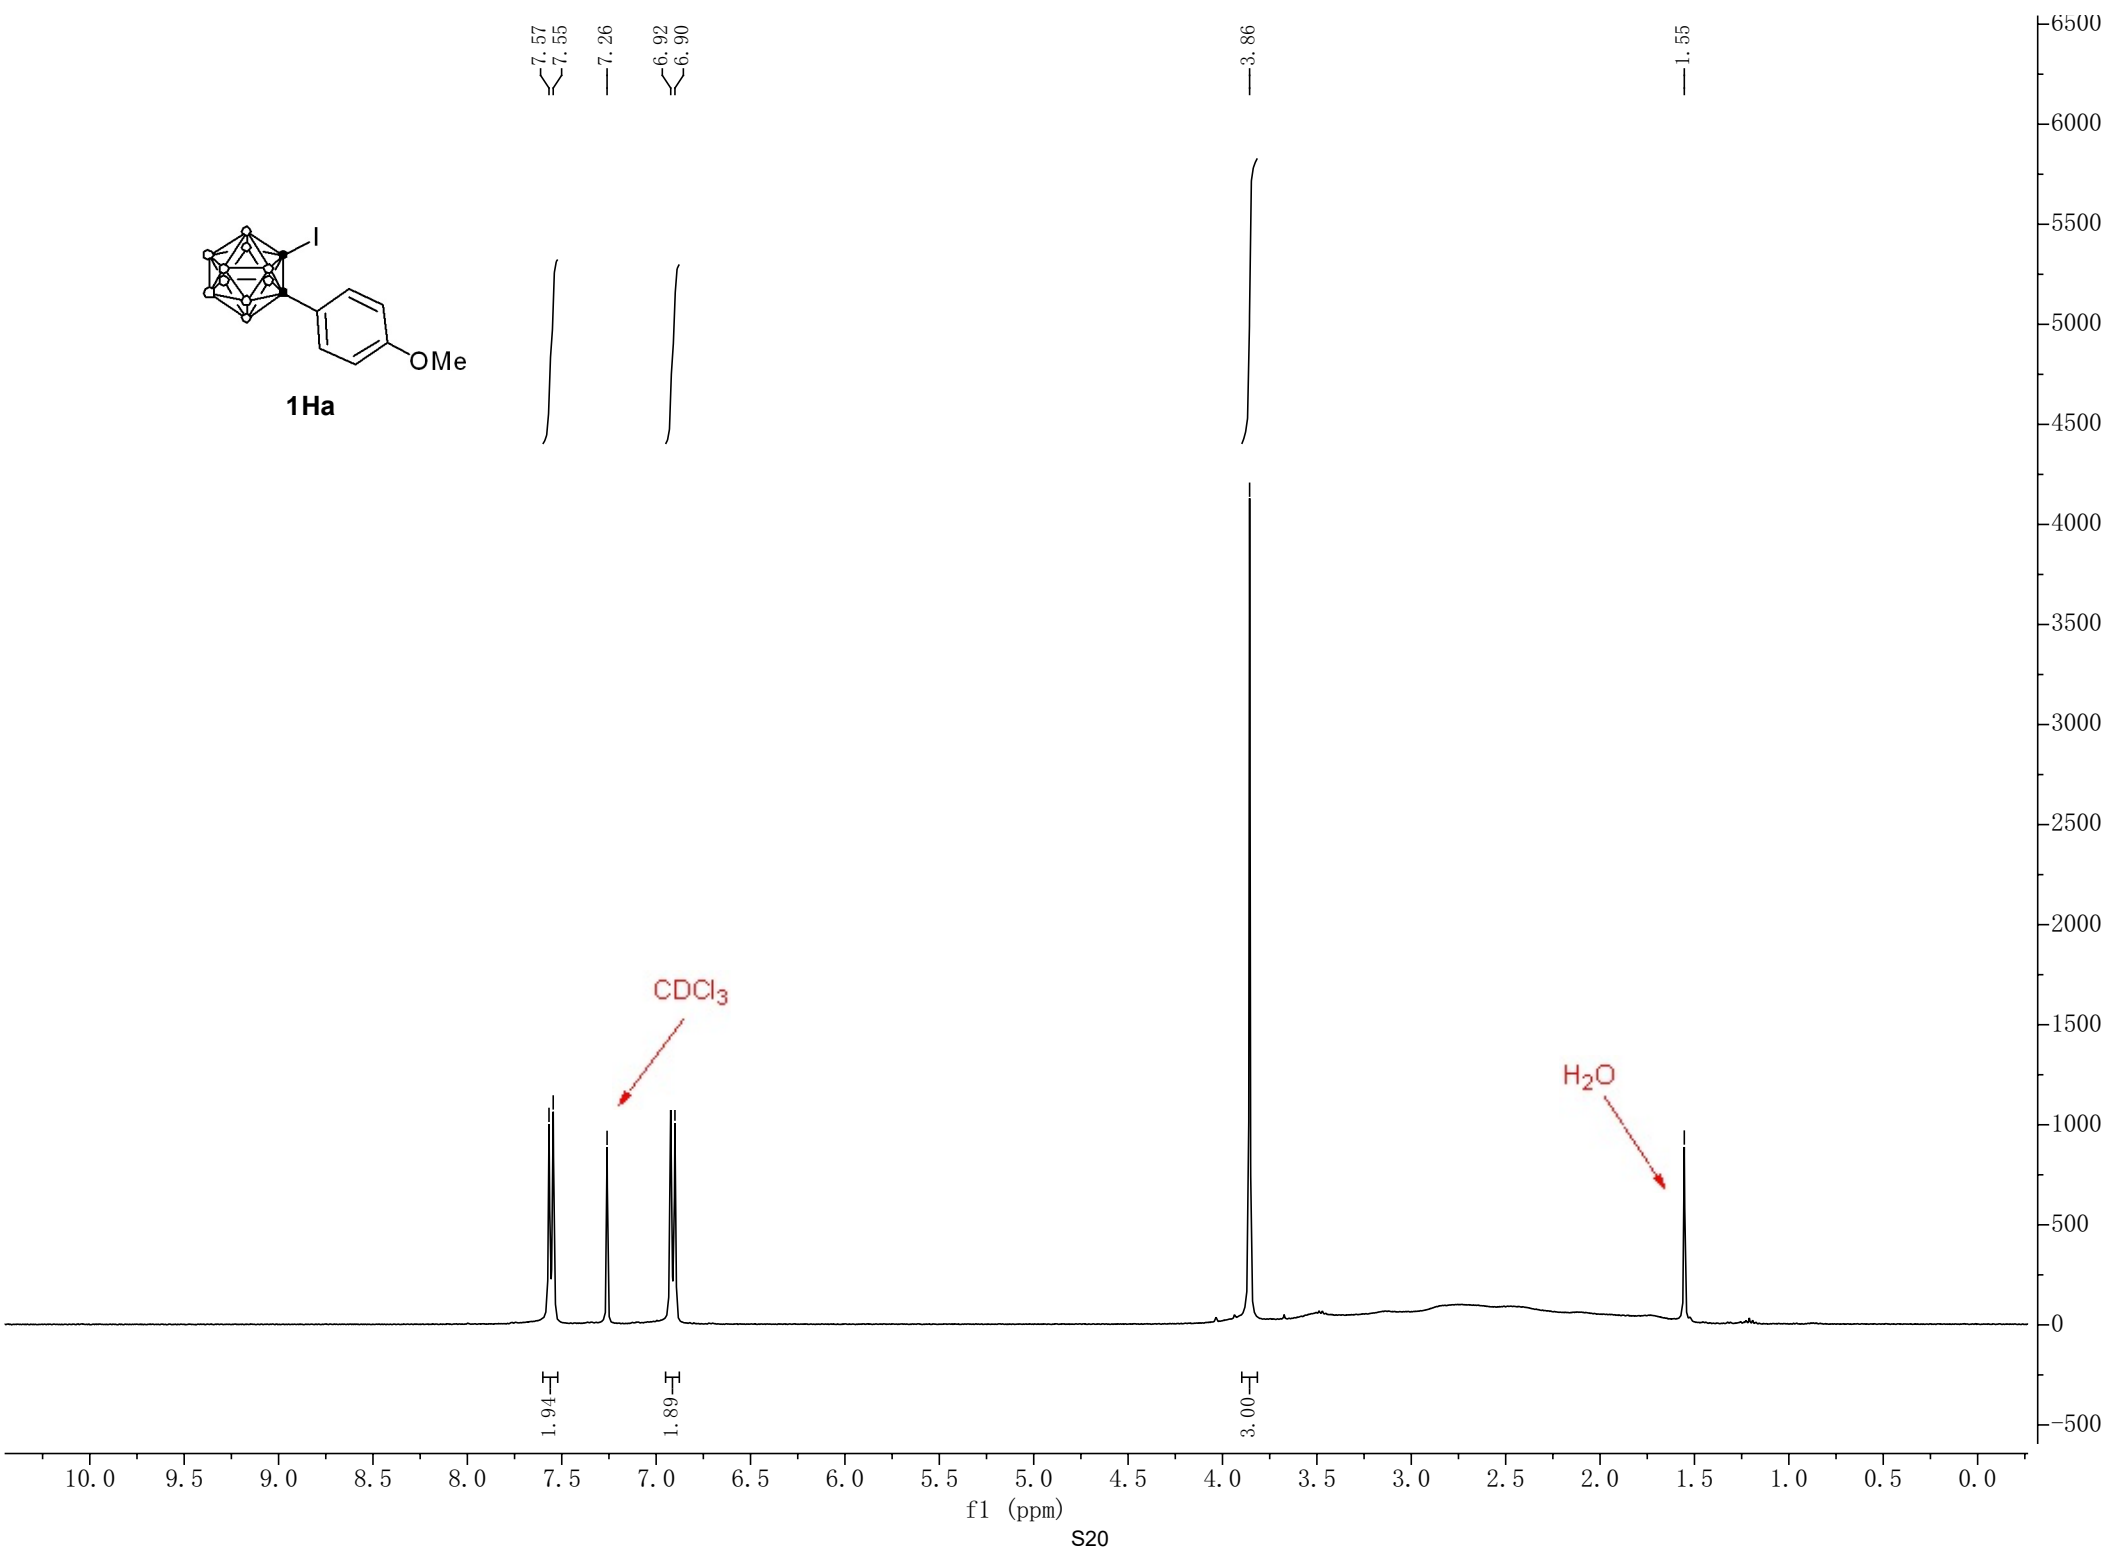

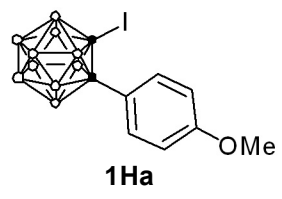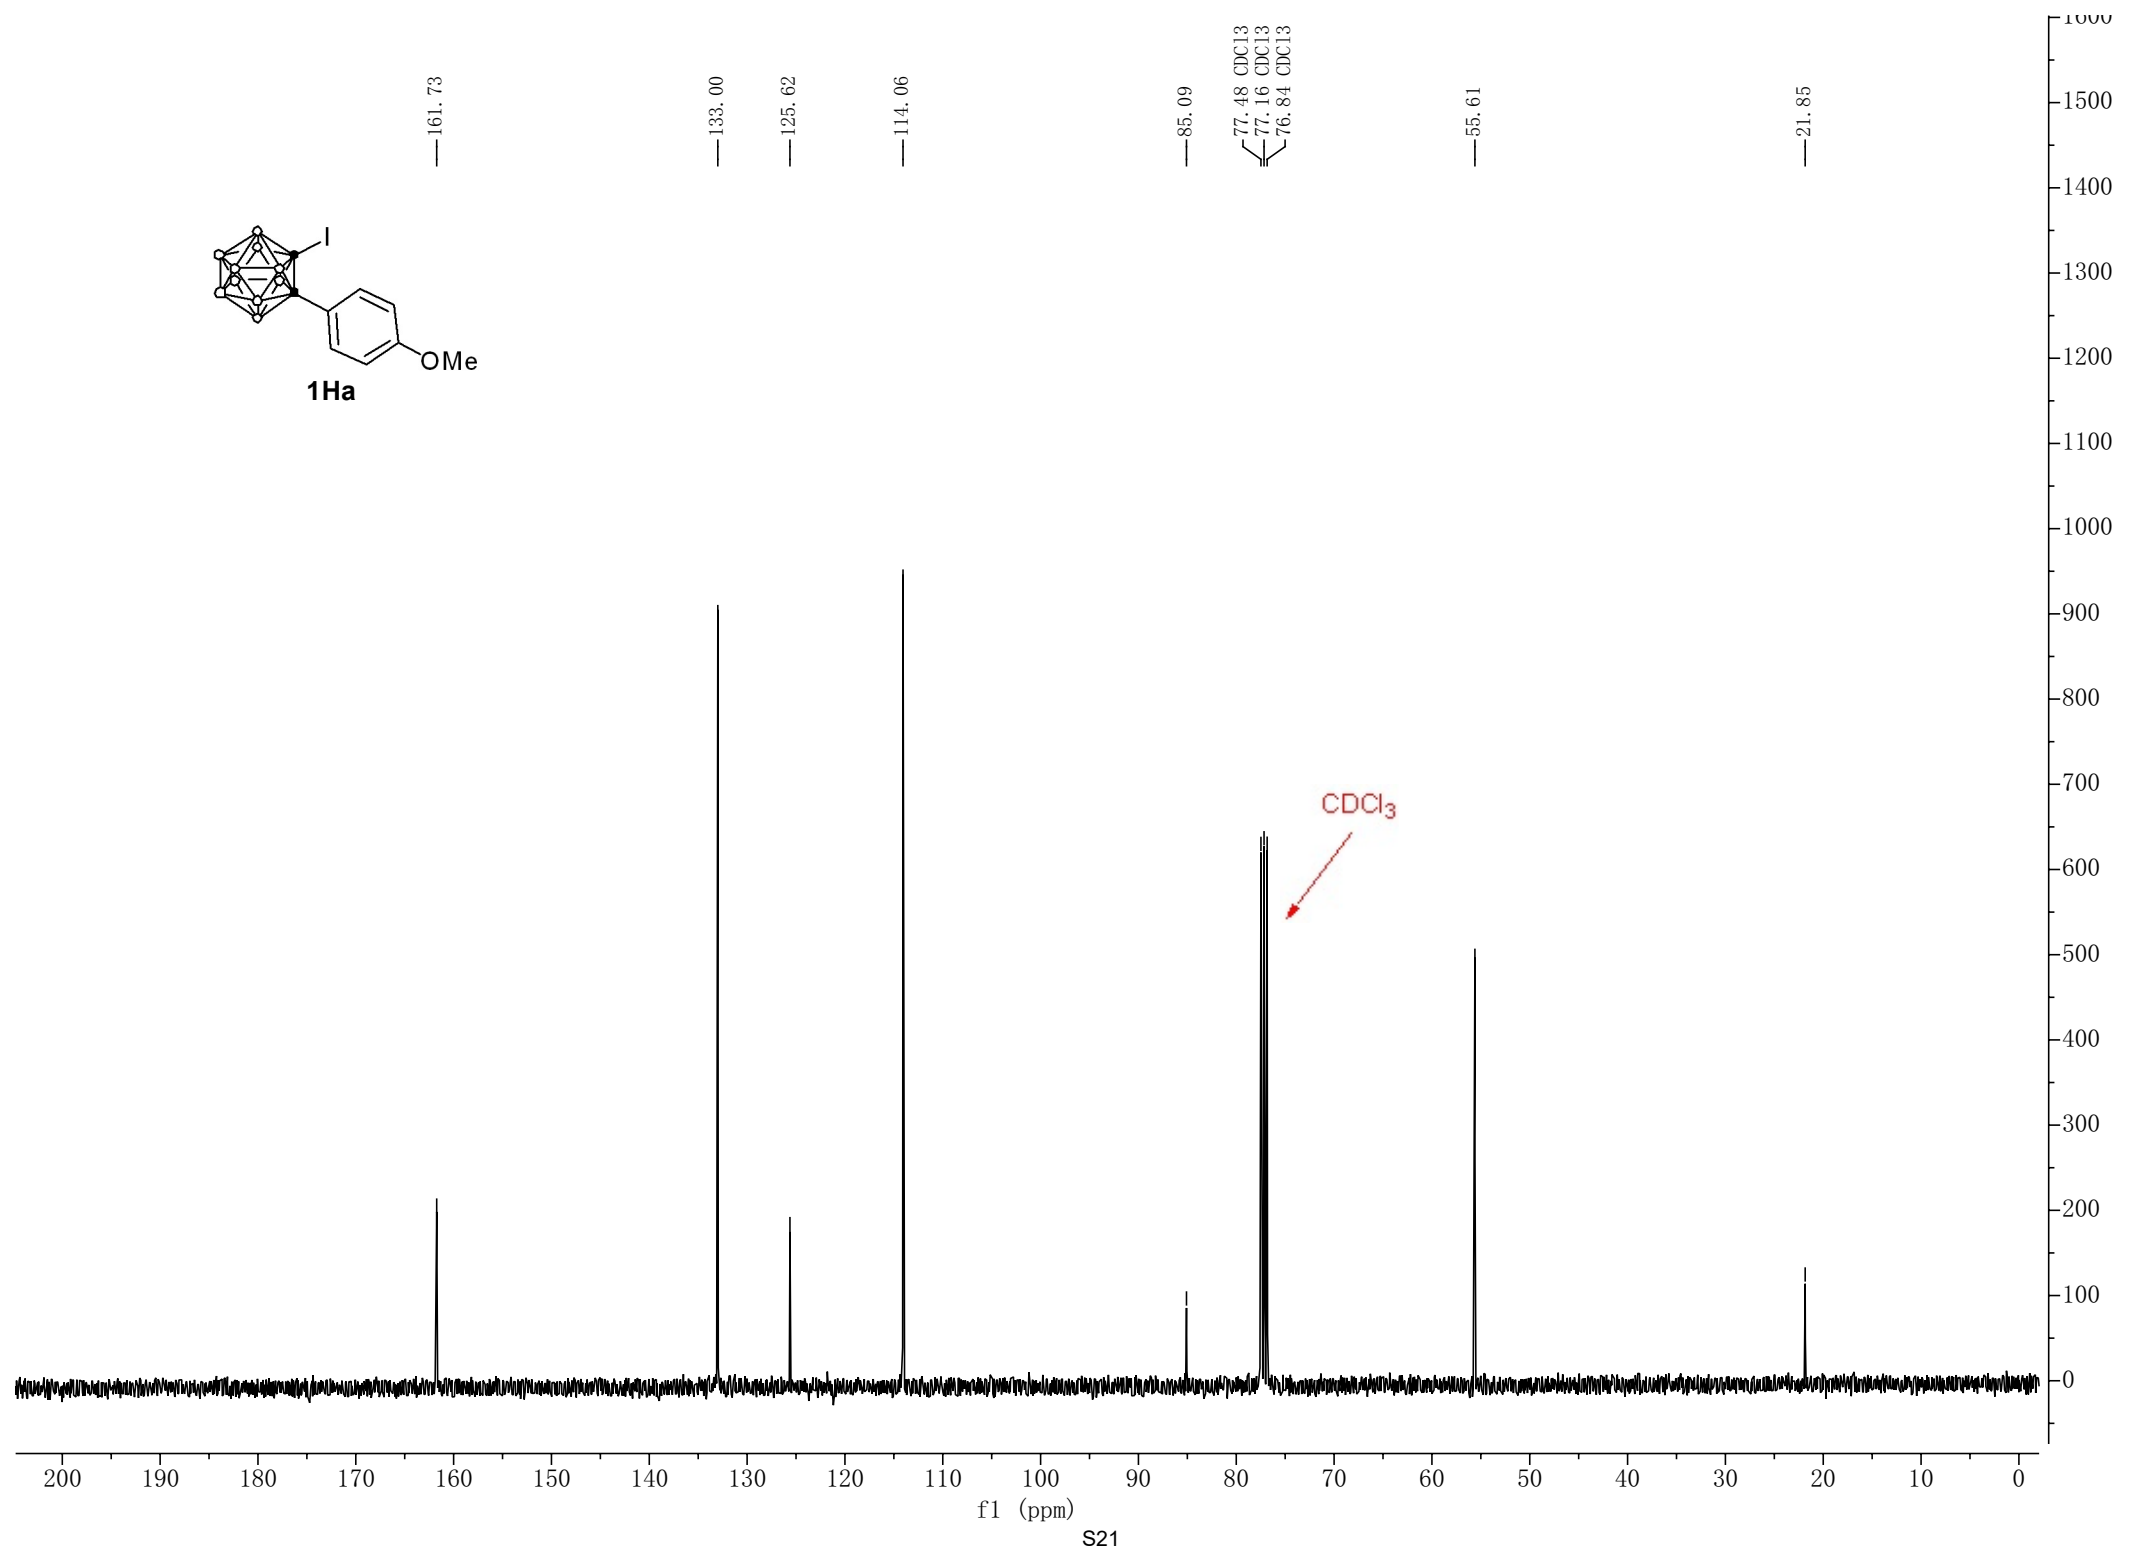

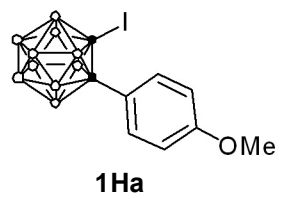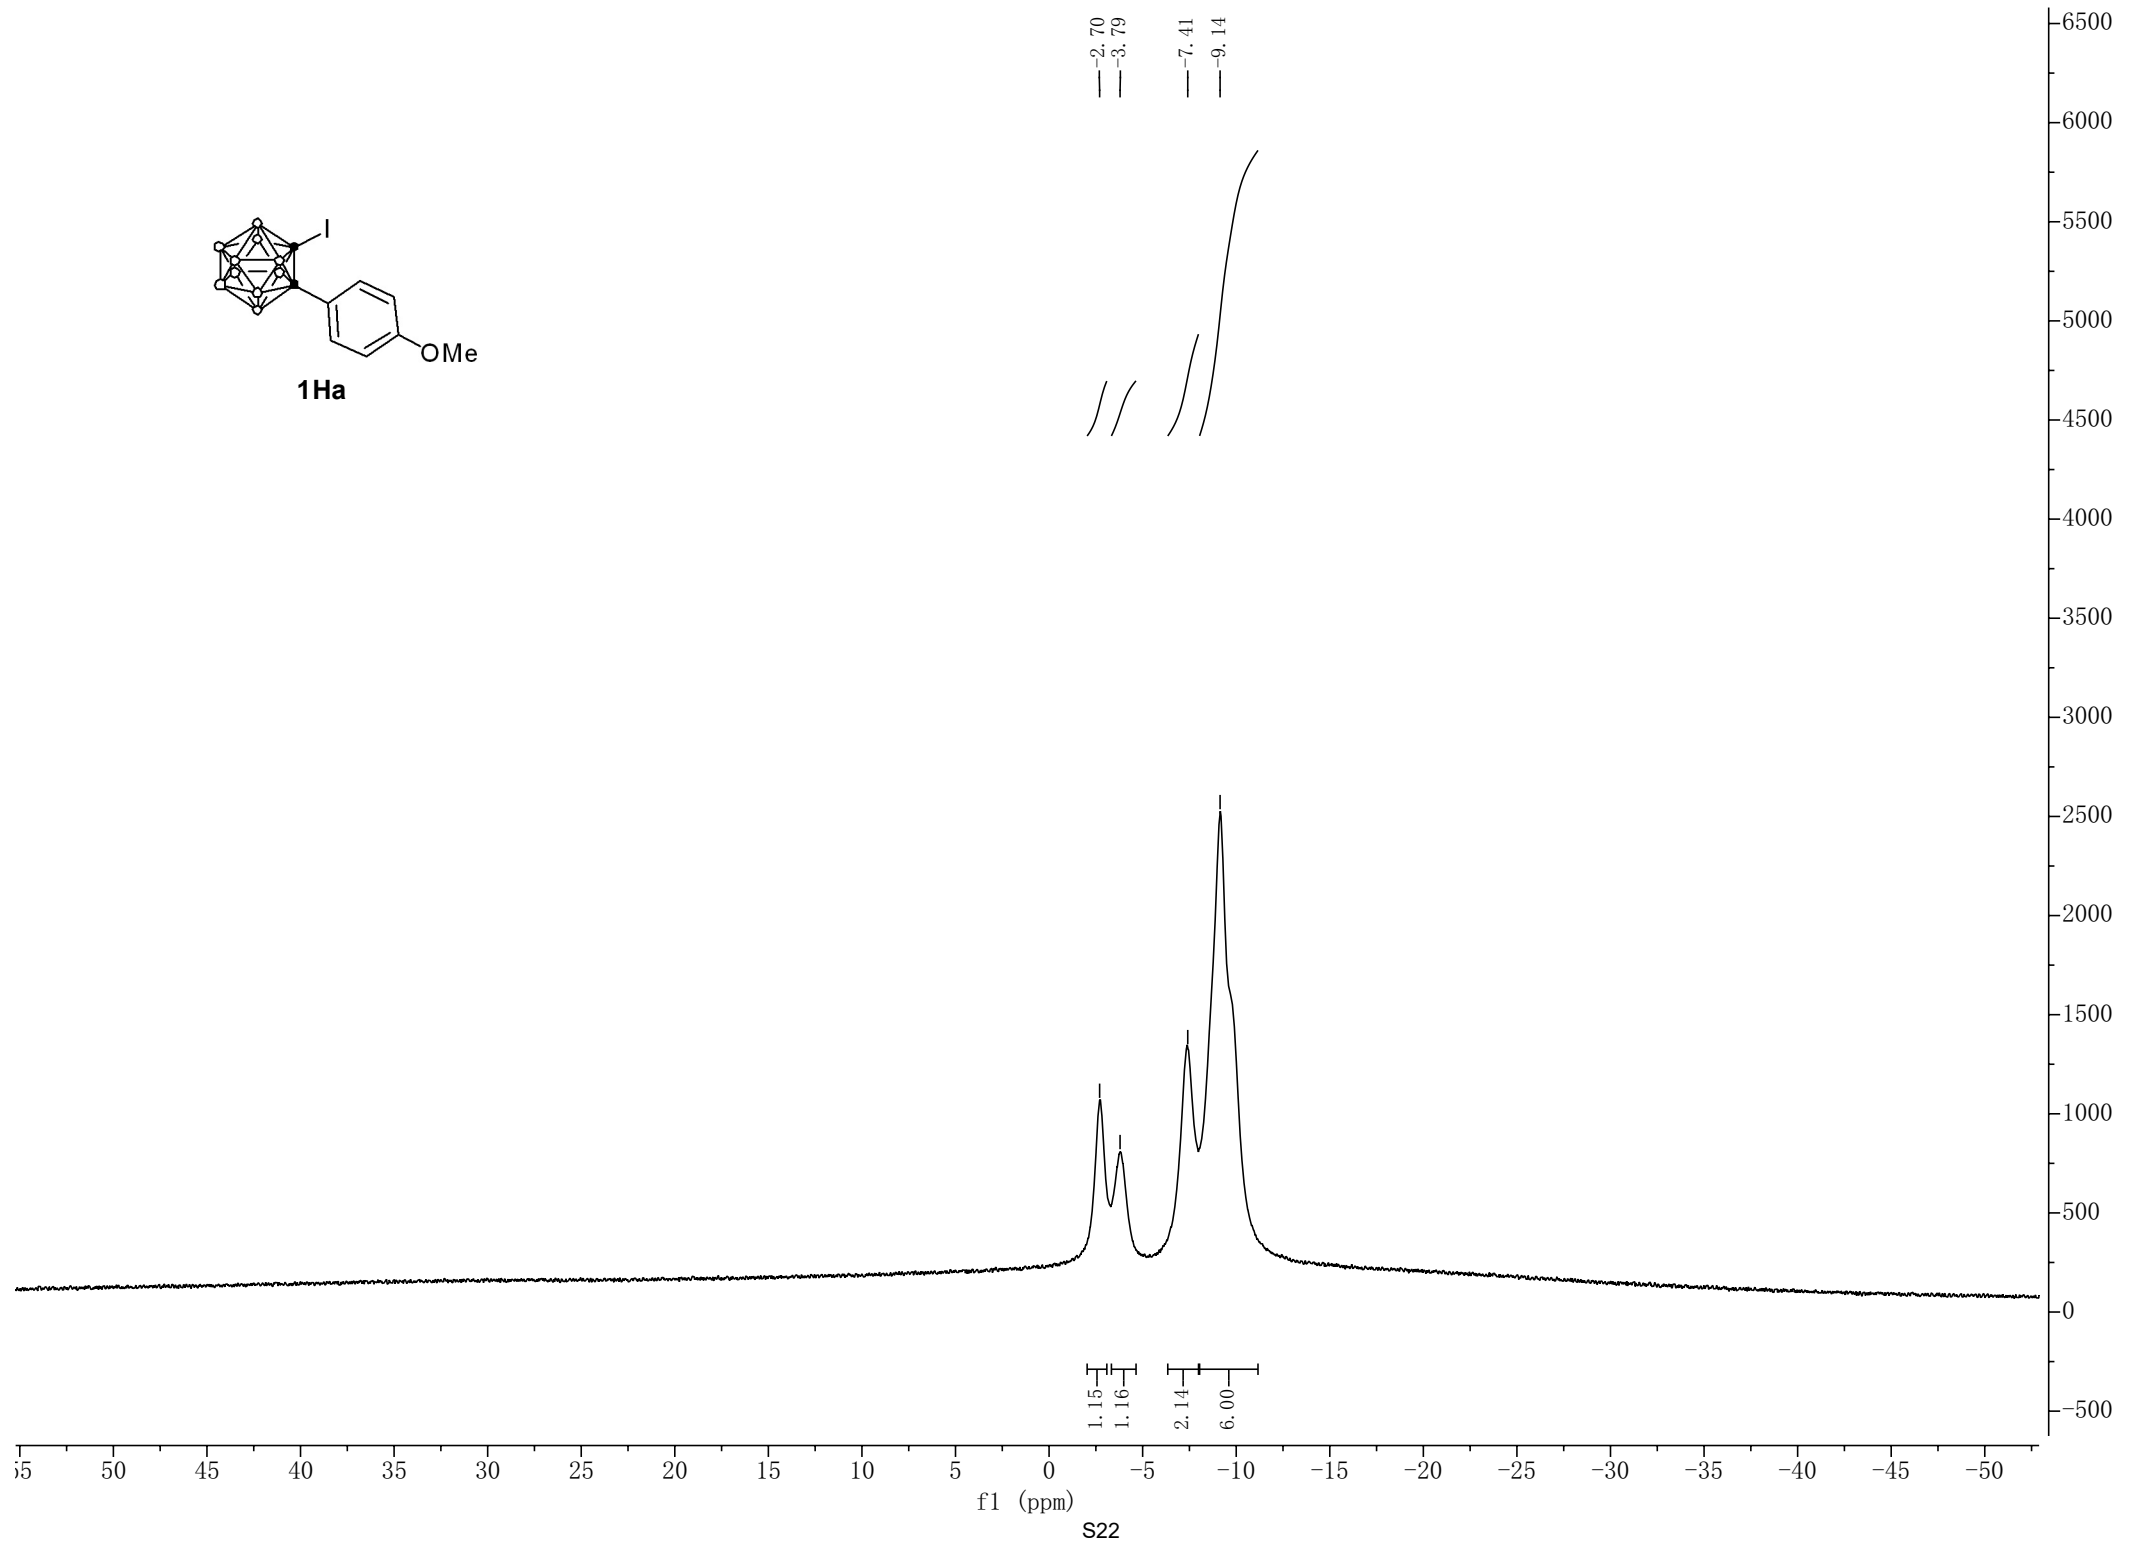

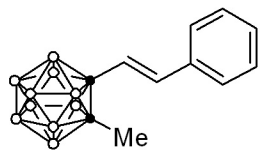

**3Aa**

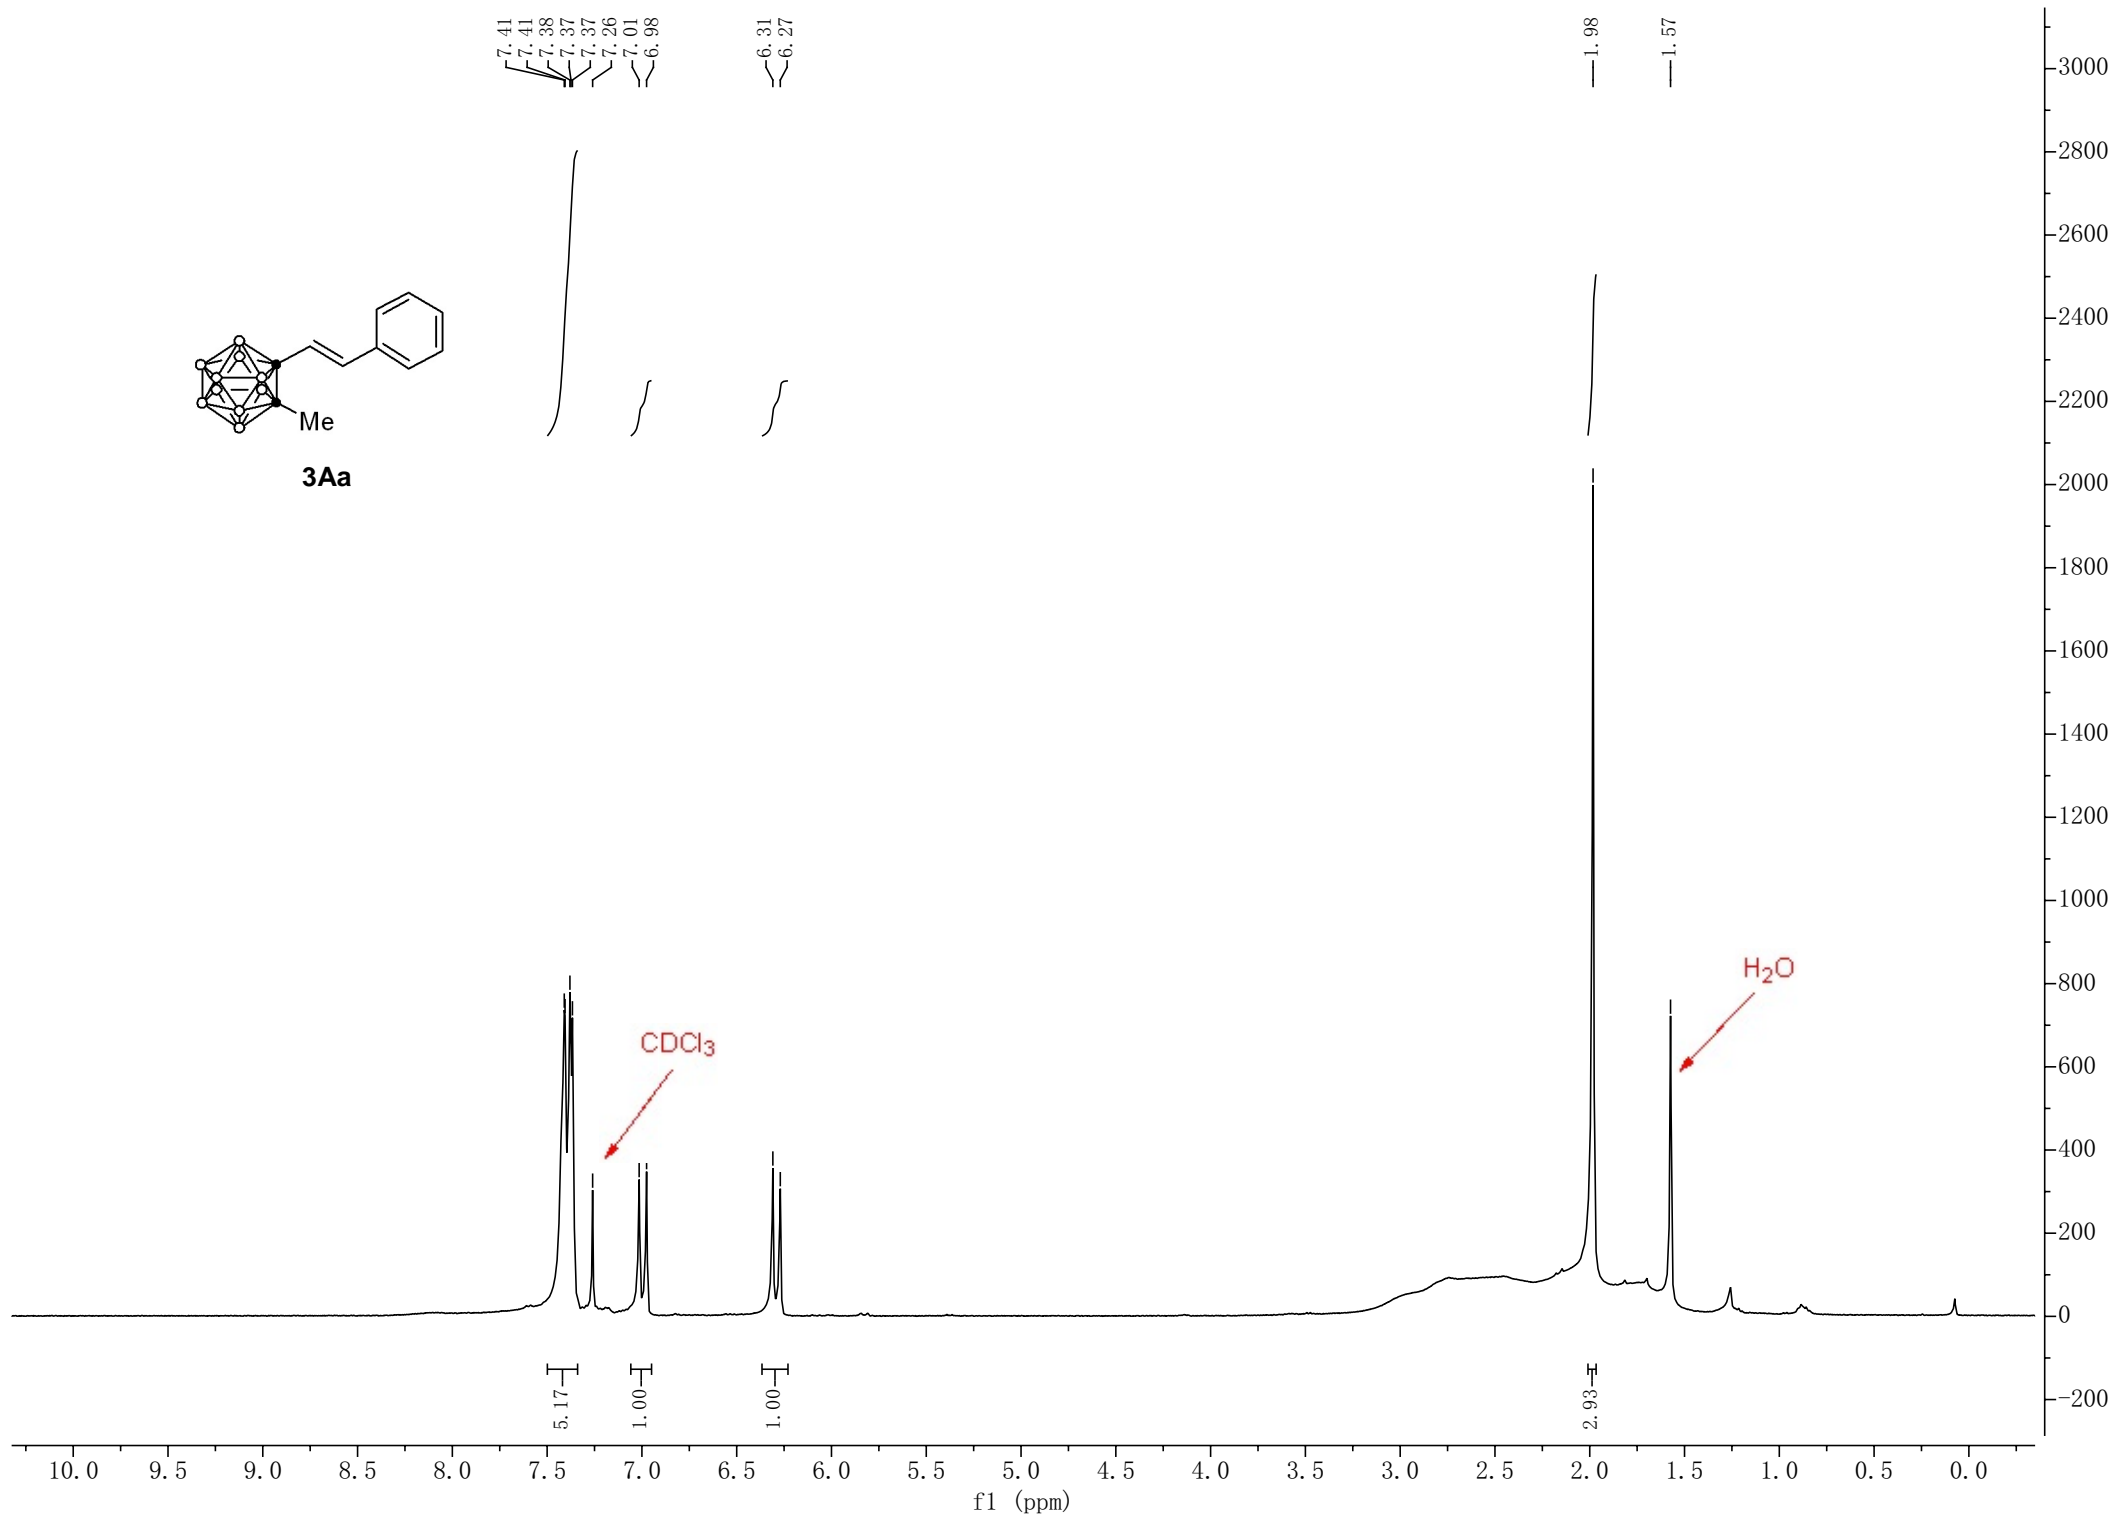

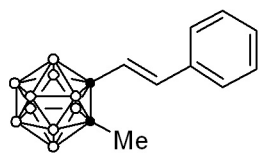

**3Aa**

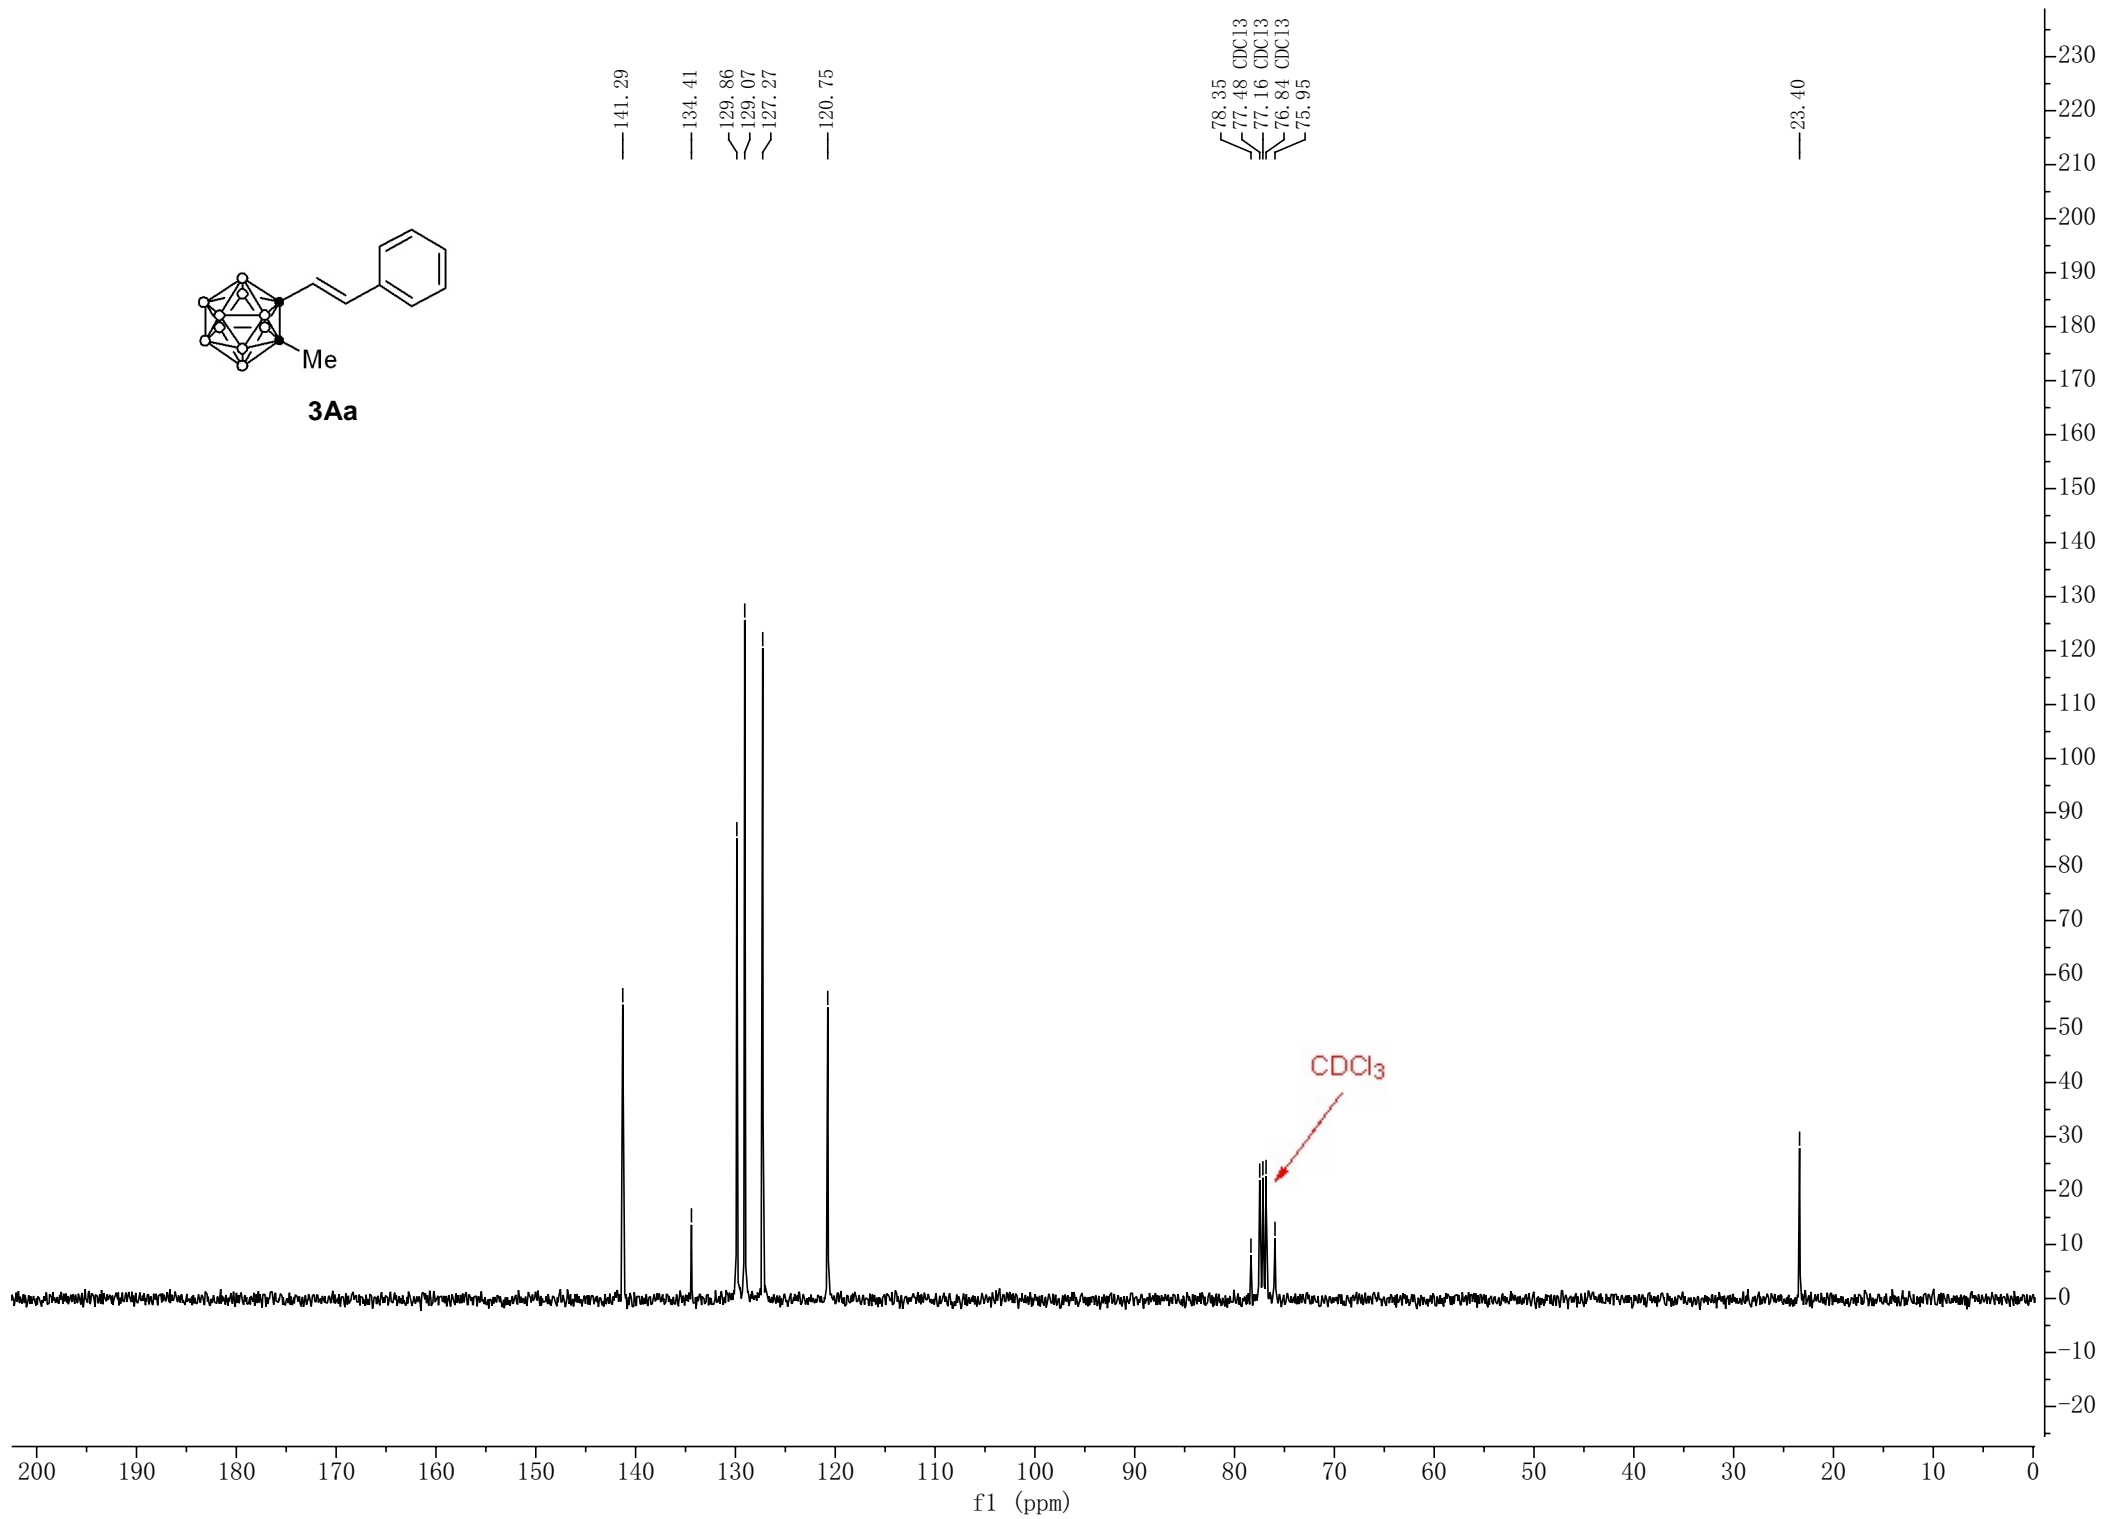





**3Aa**

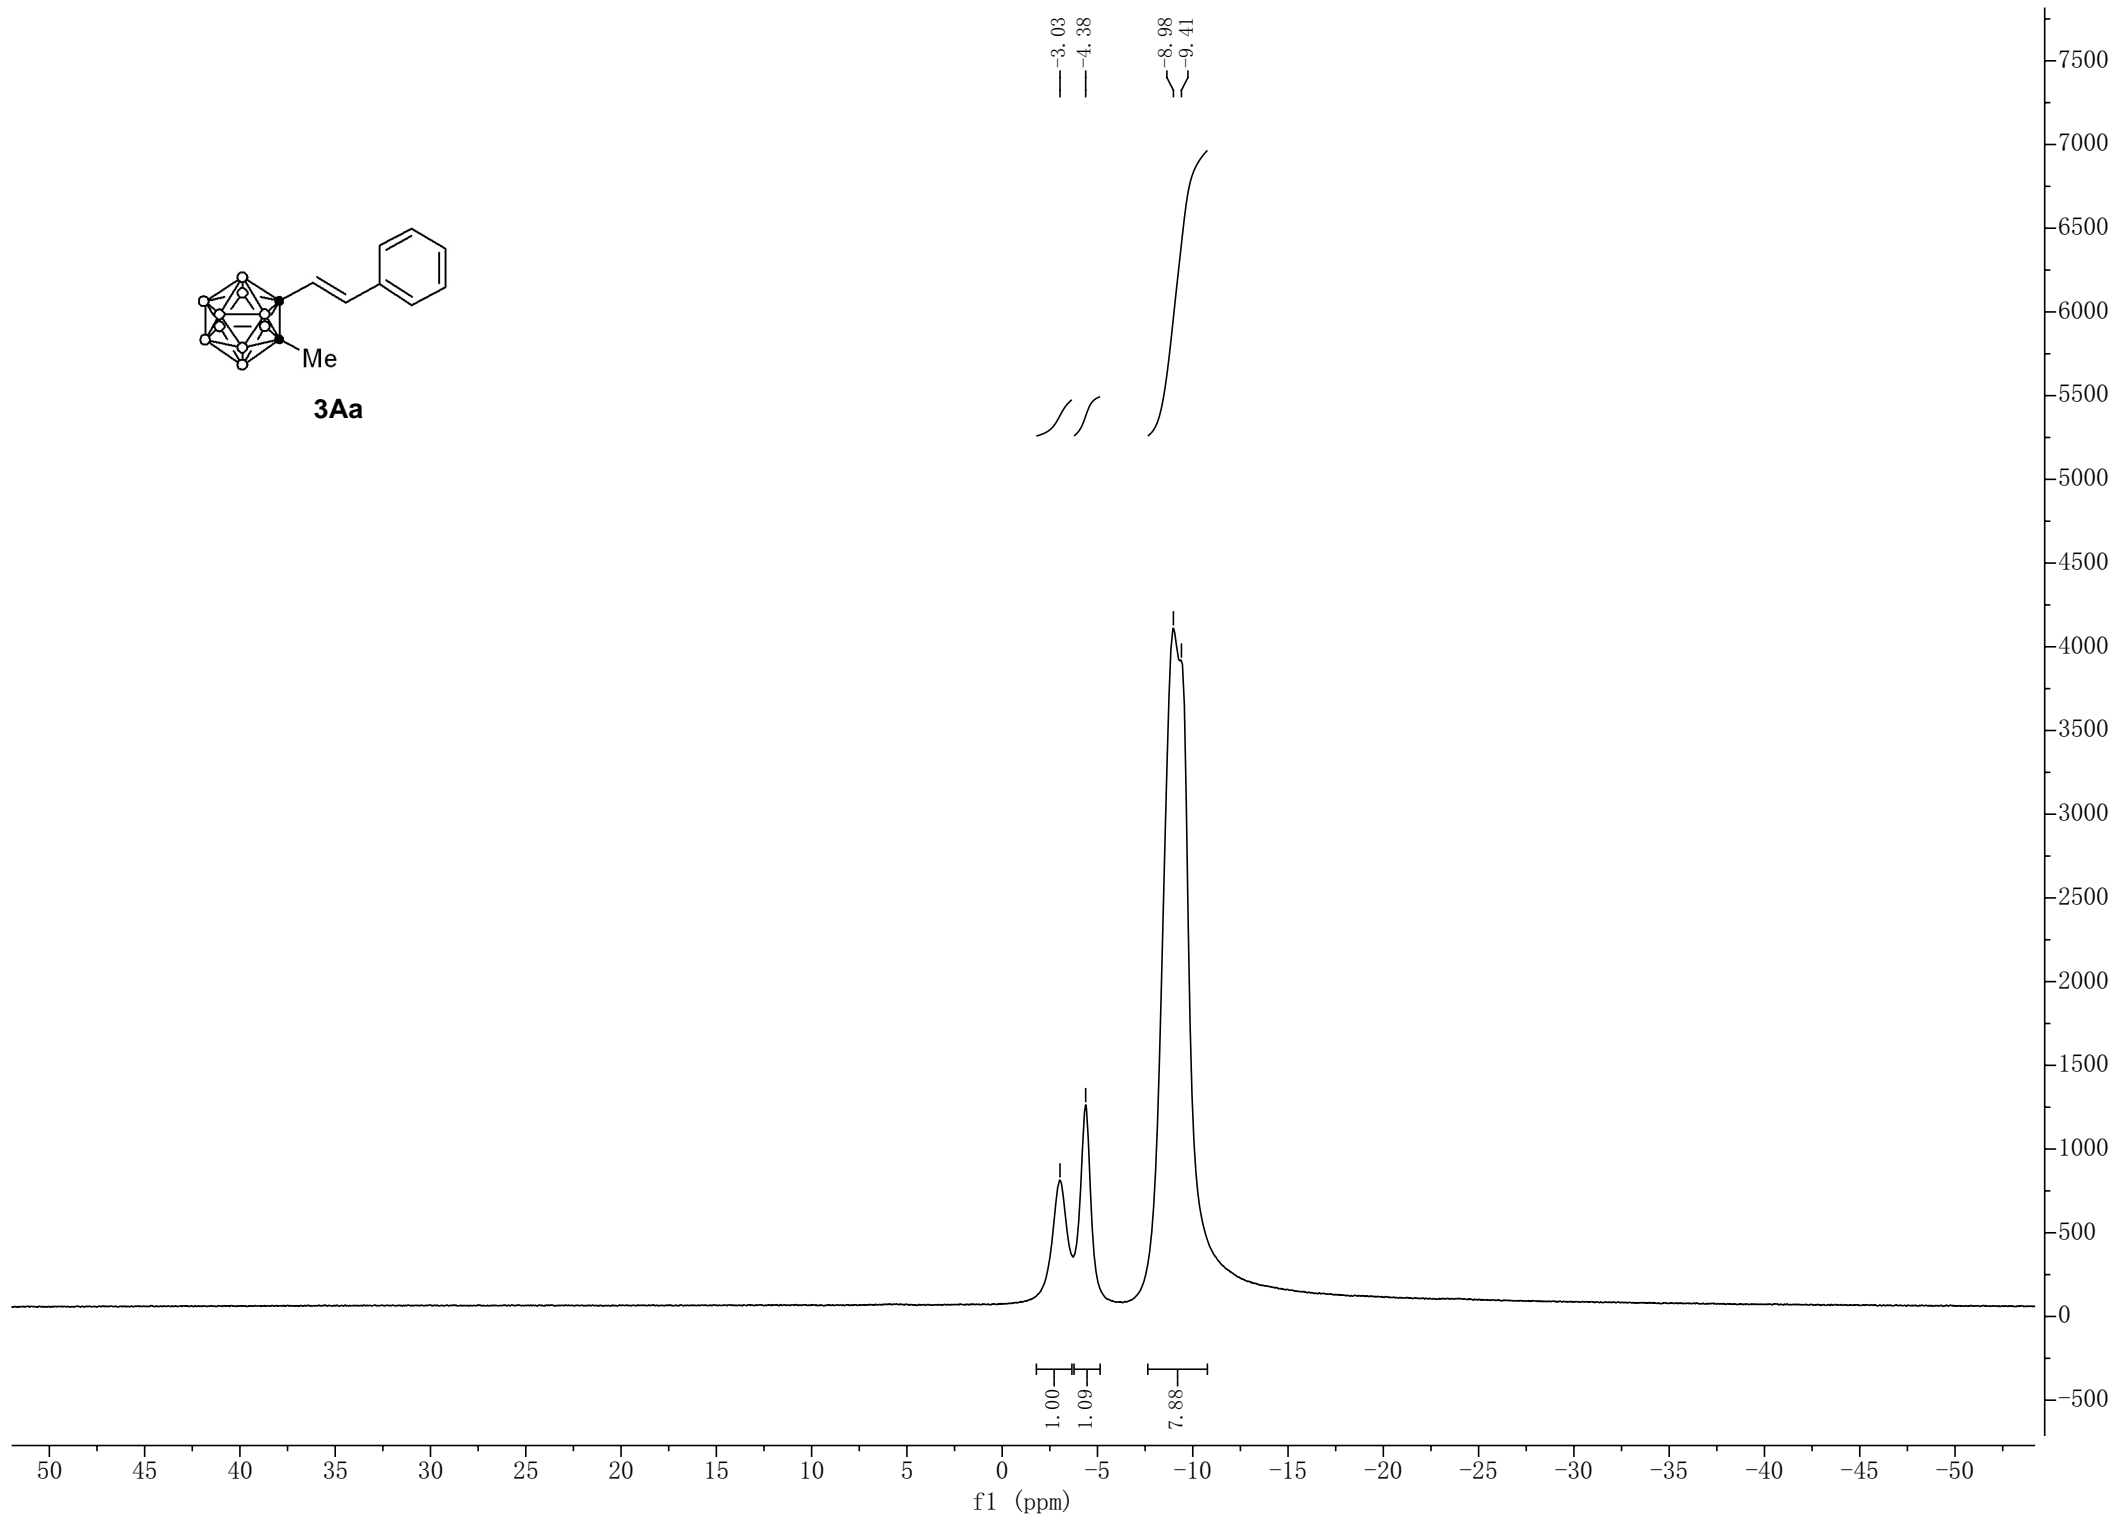

— 3.03  
— 4.38  
— 8.98  
— 9.41

1.00  
1.09  
7.88

f1 (ppm)

S25

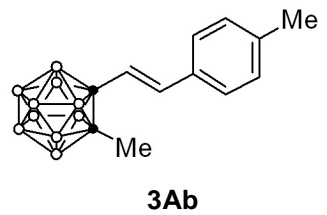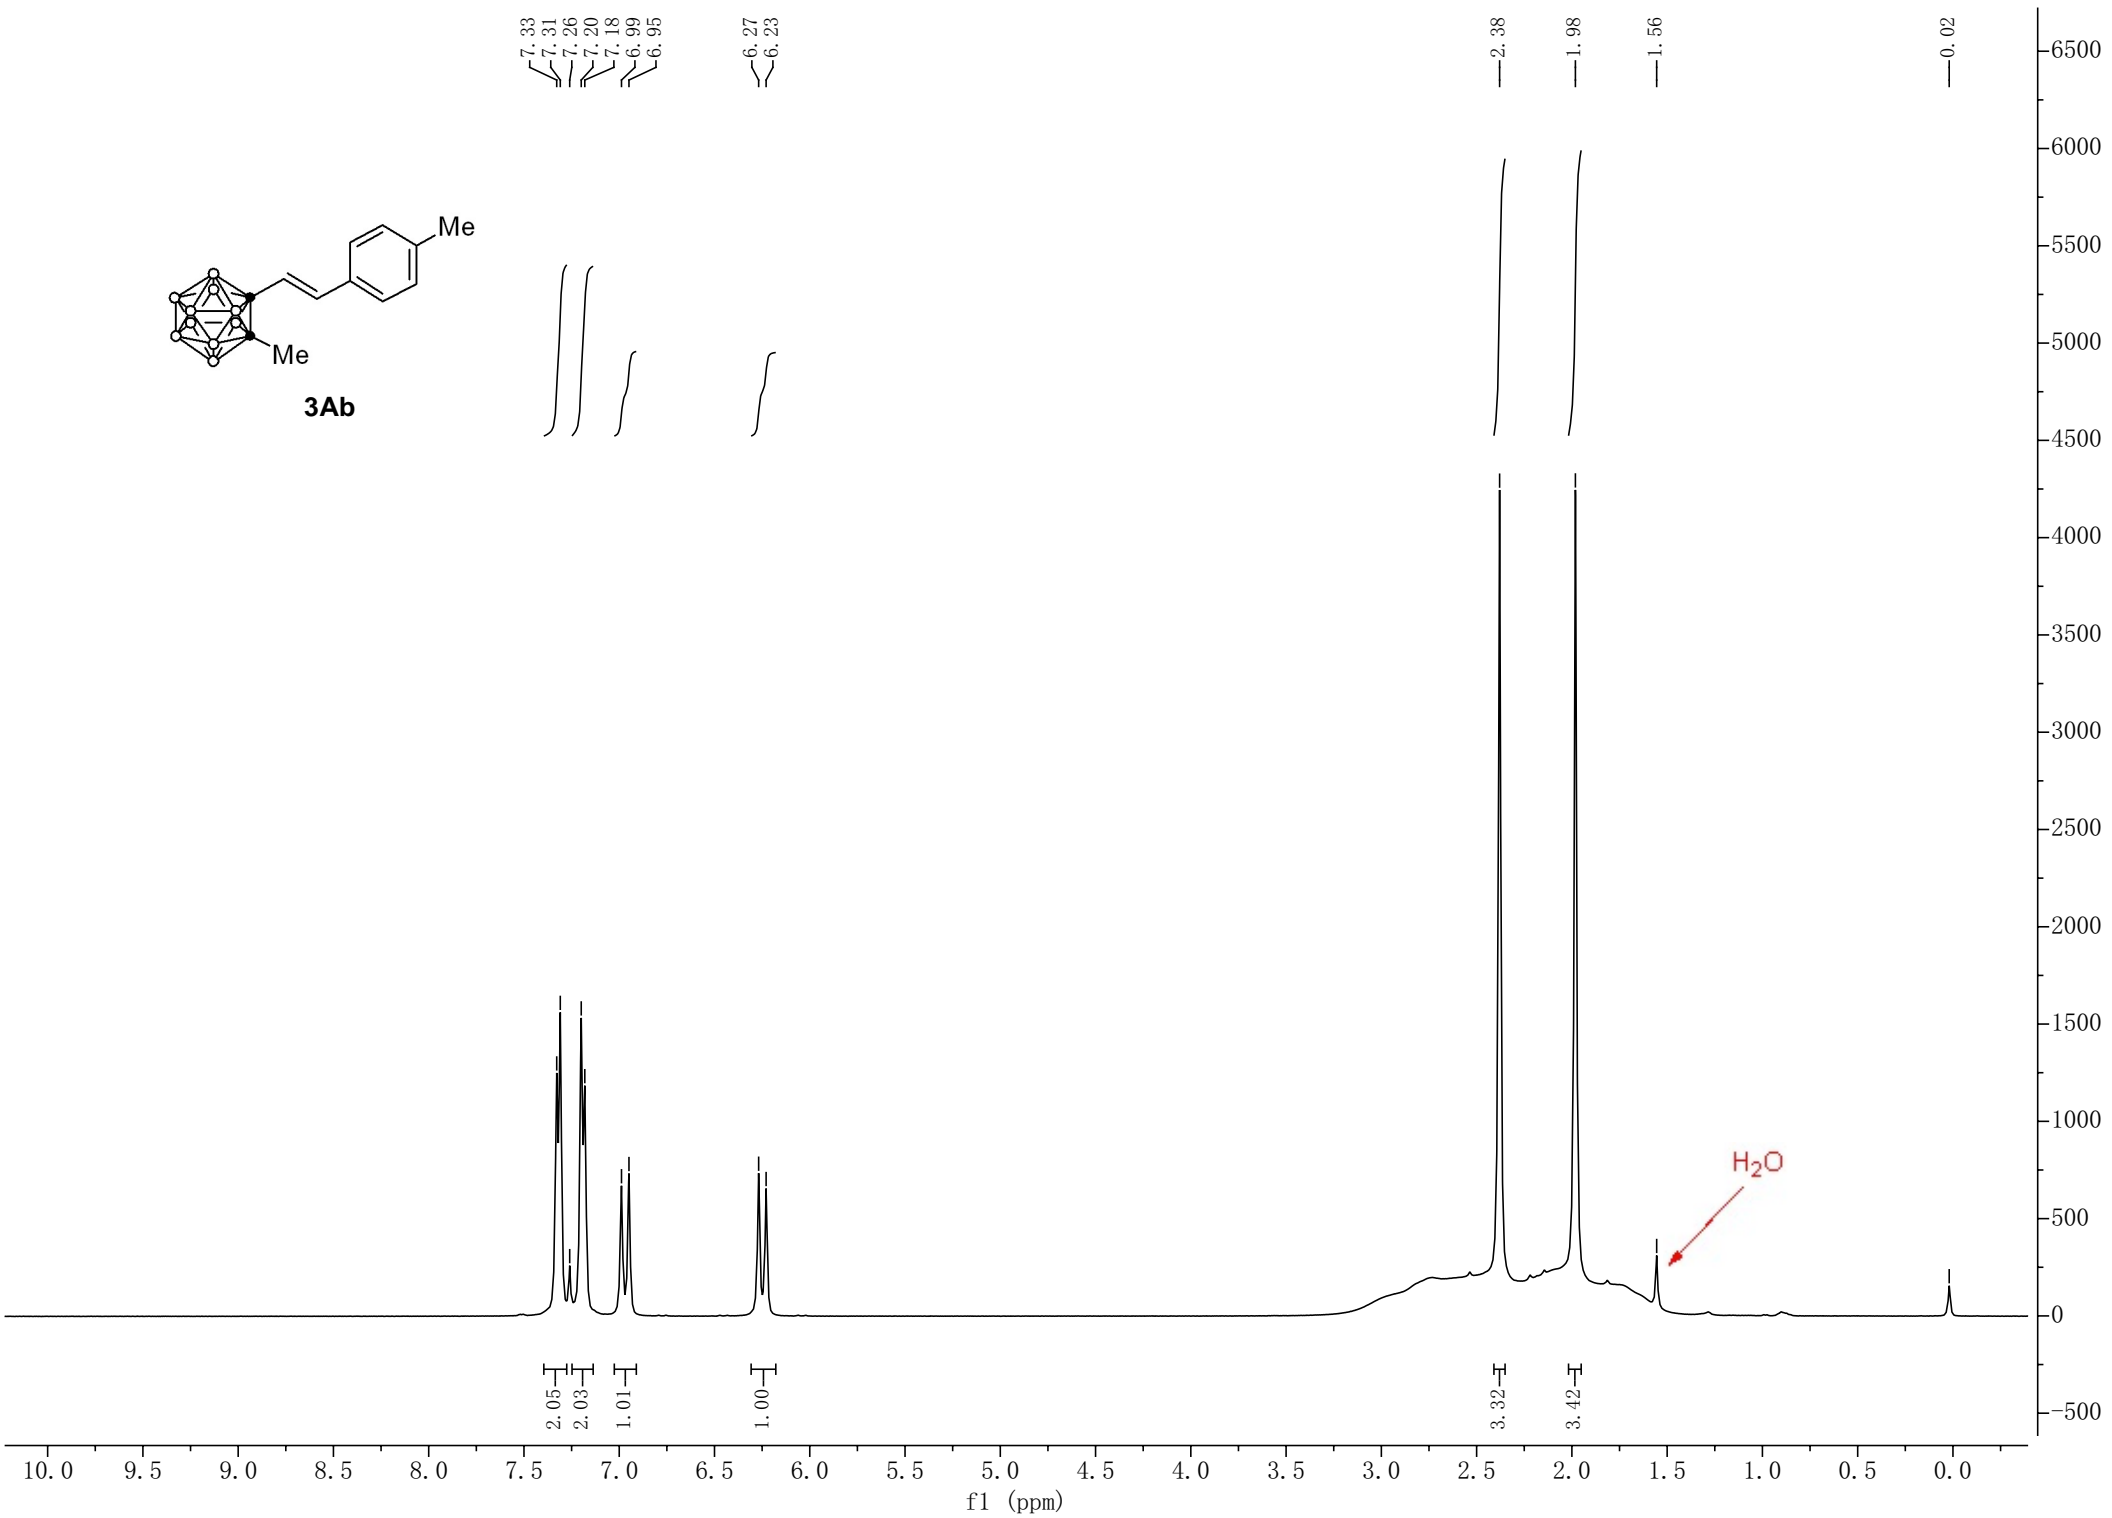

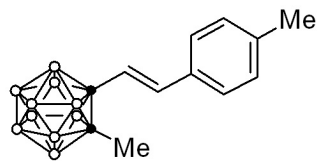

3Ab

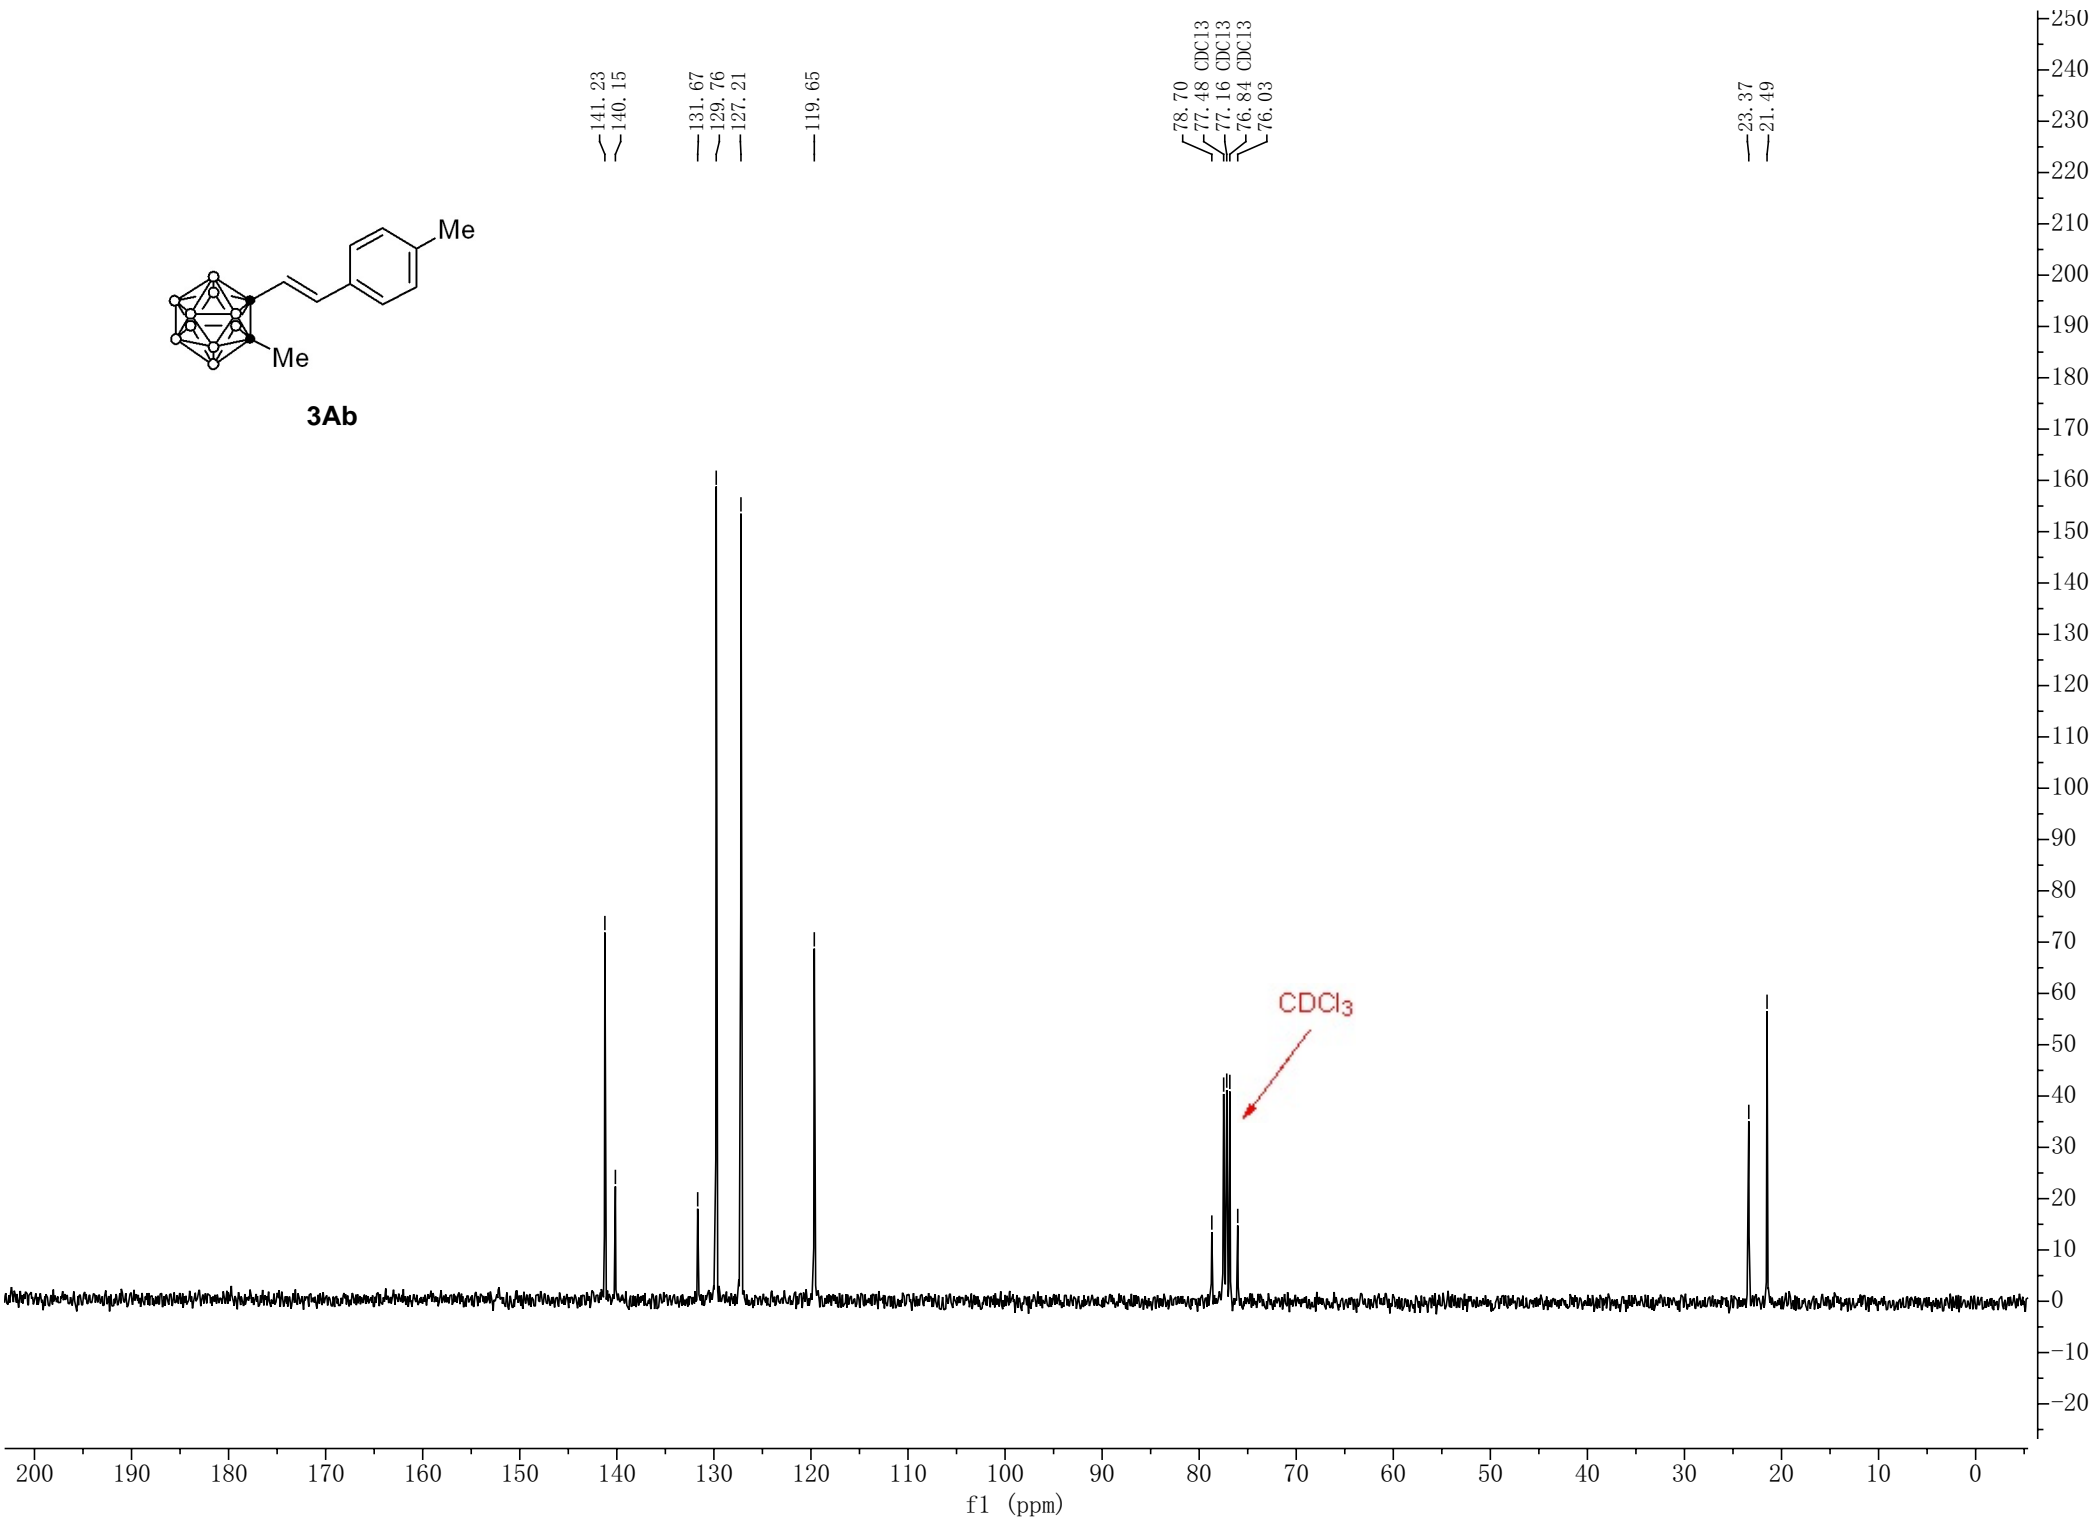

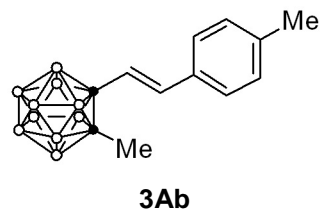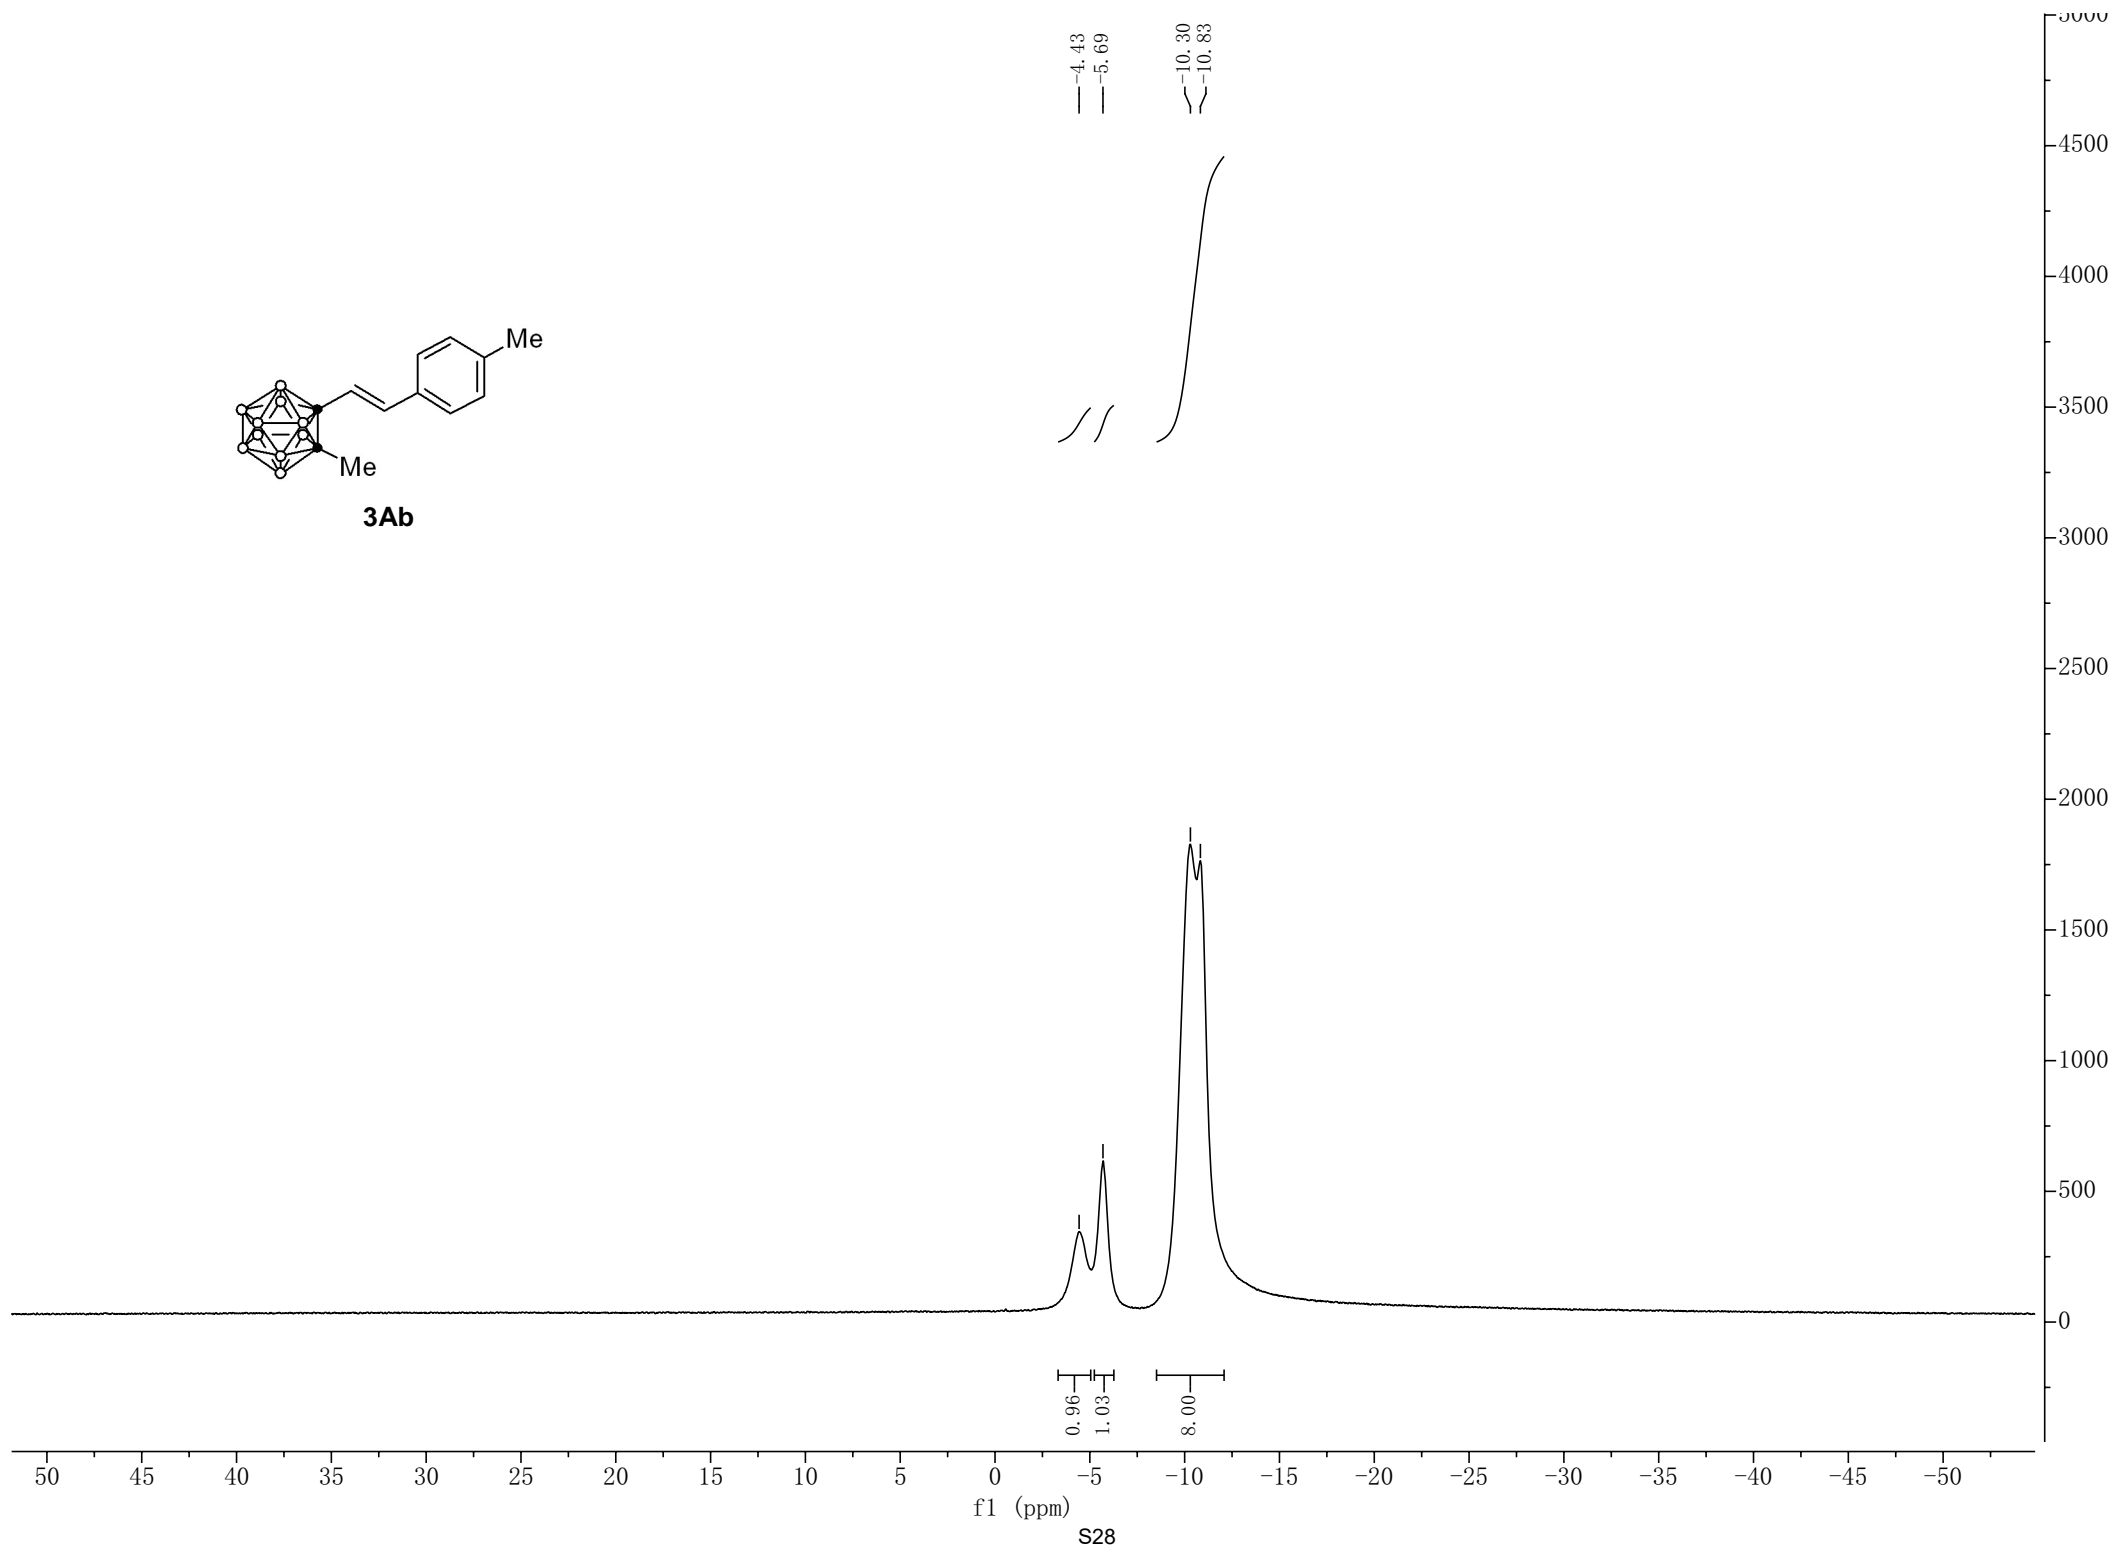

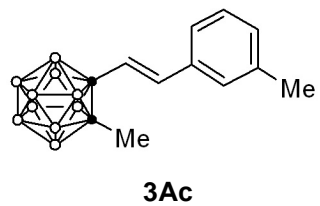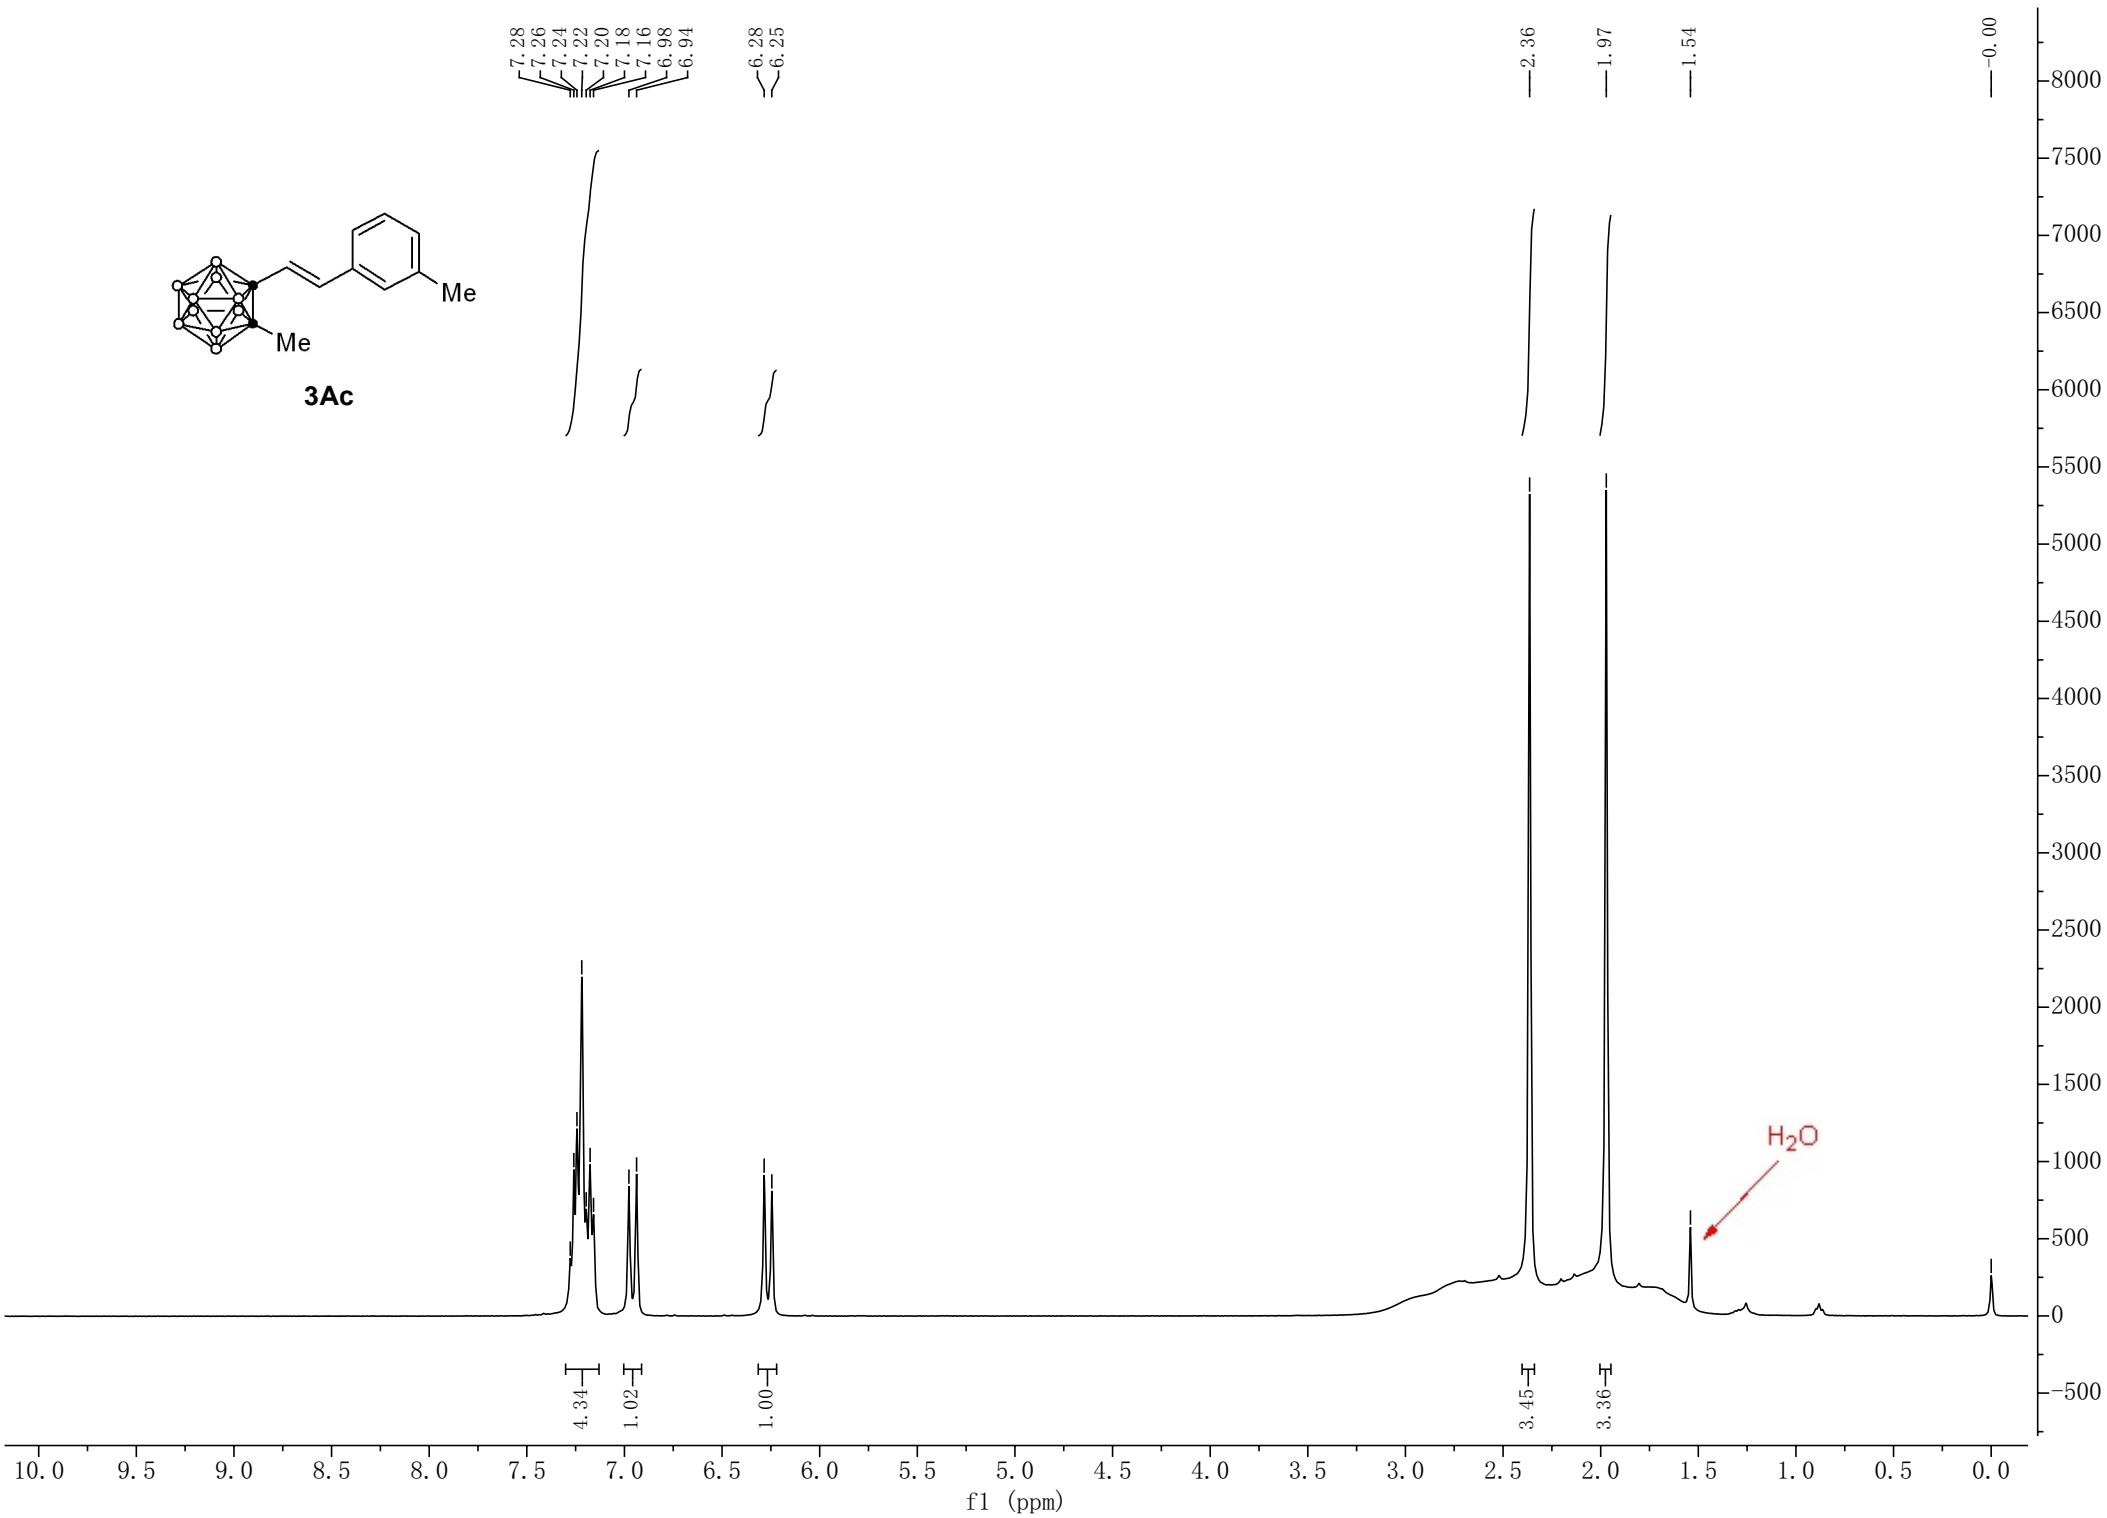

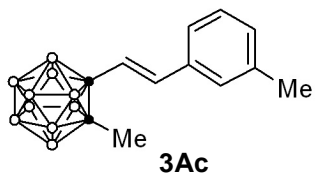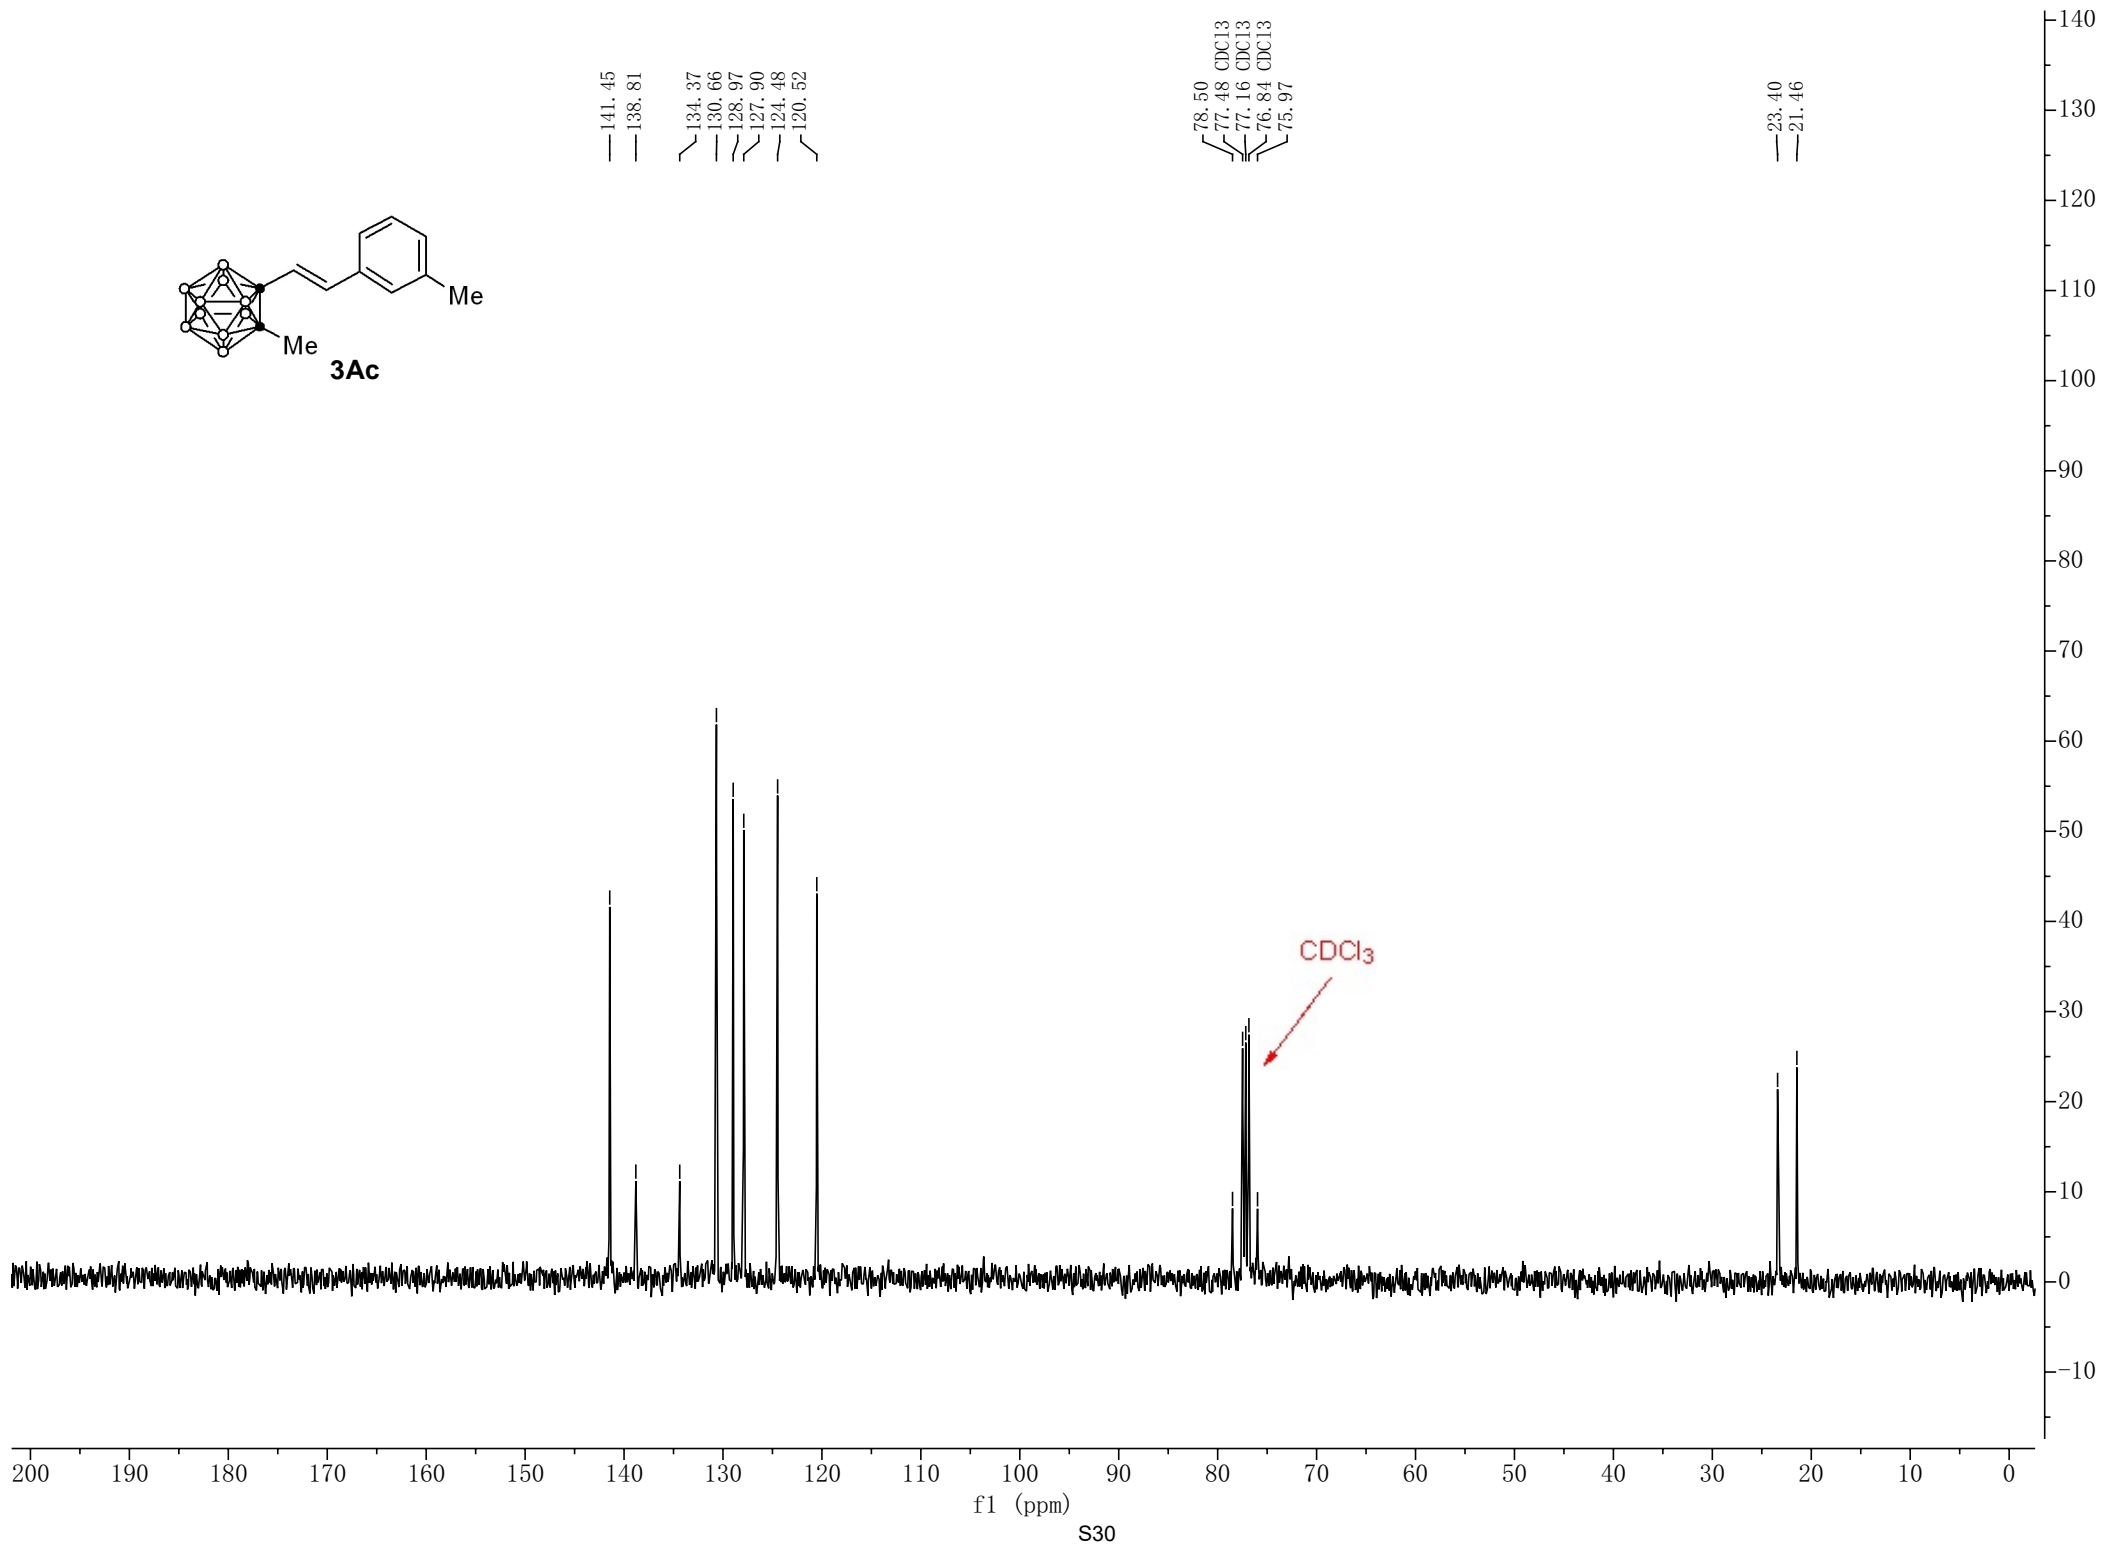

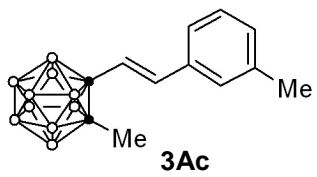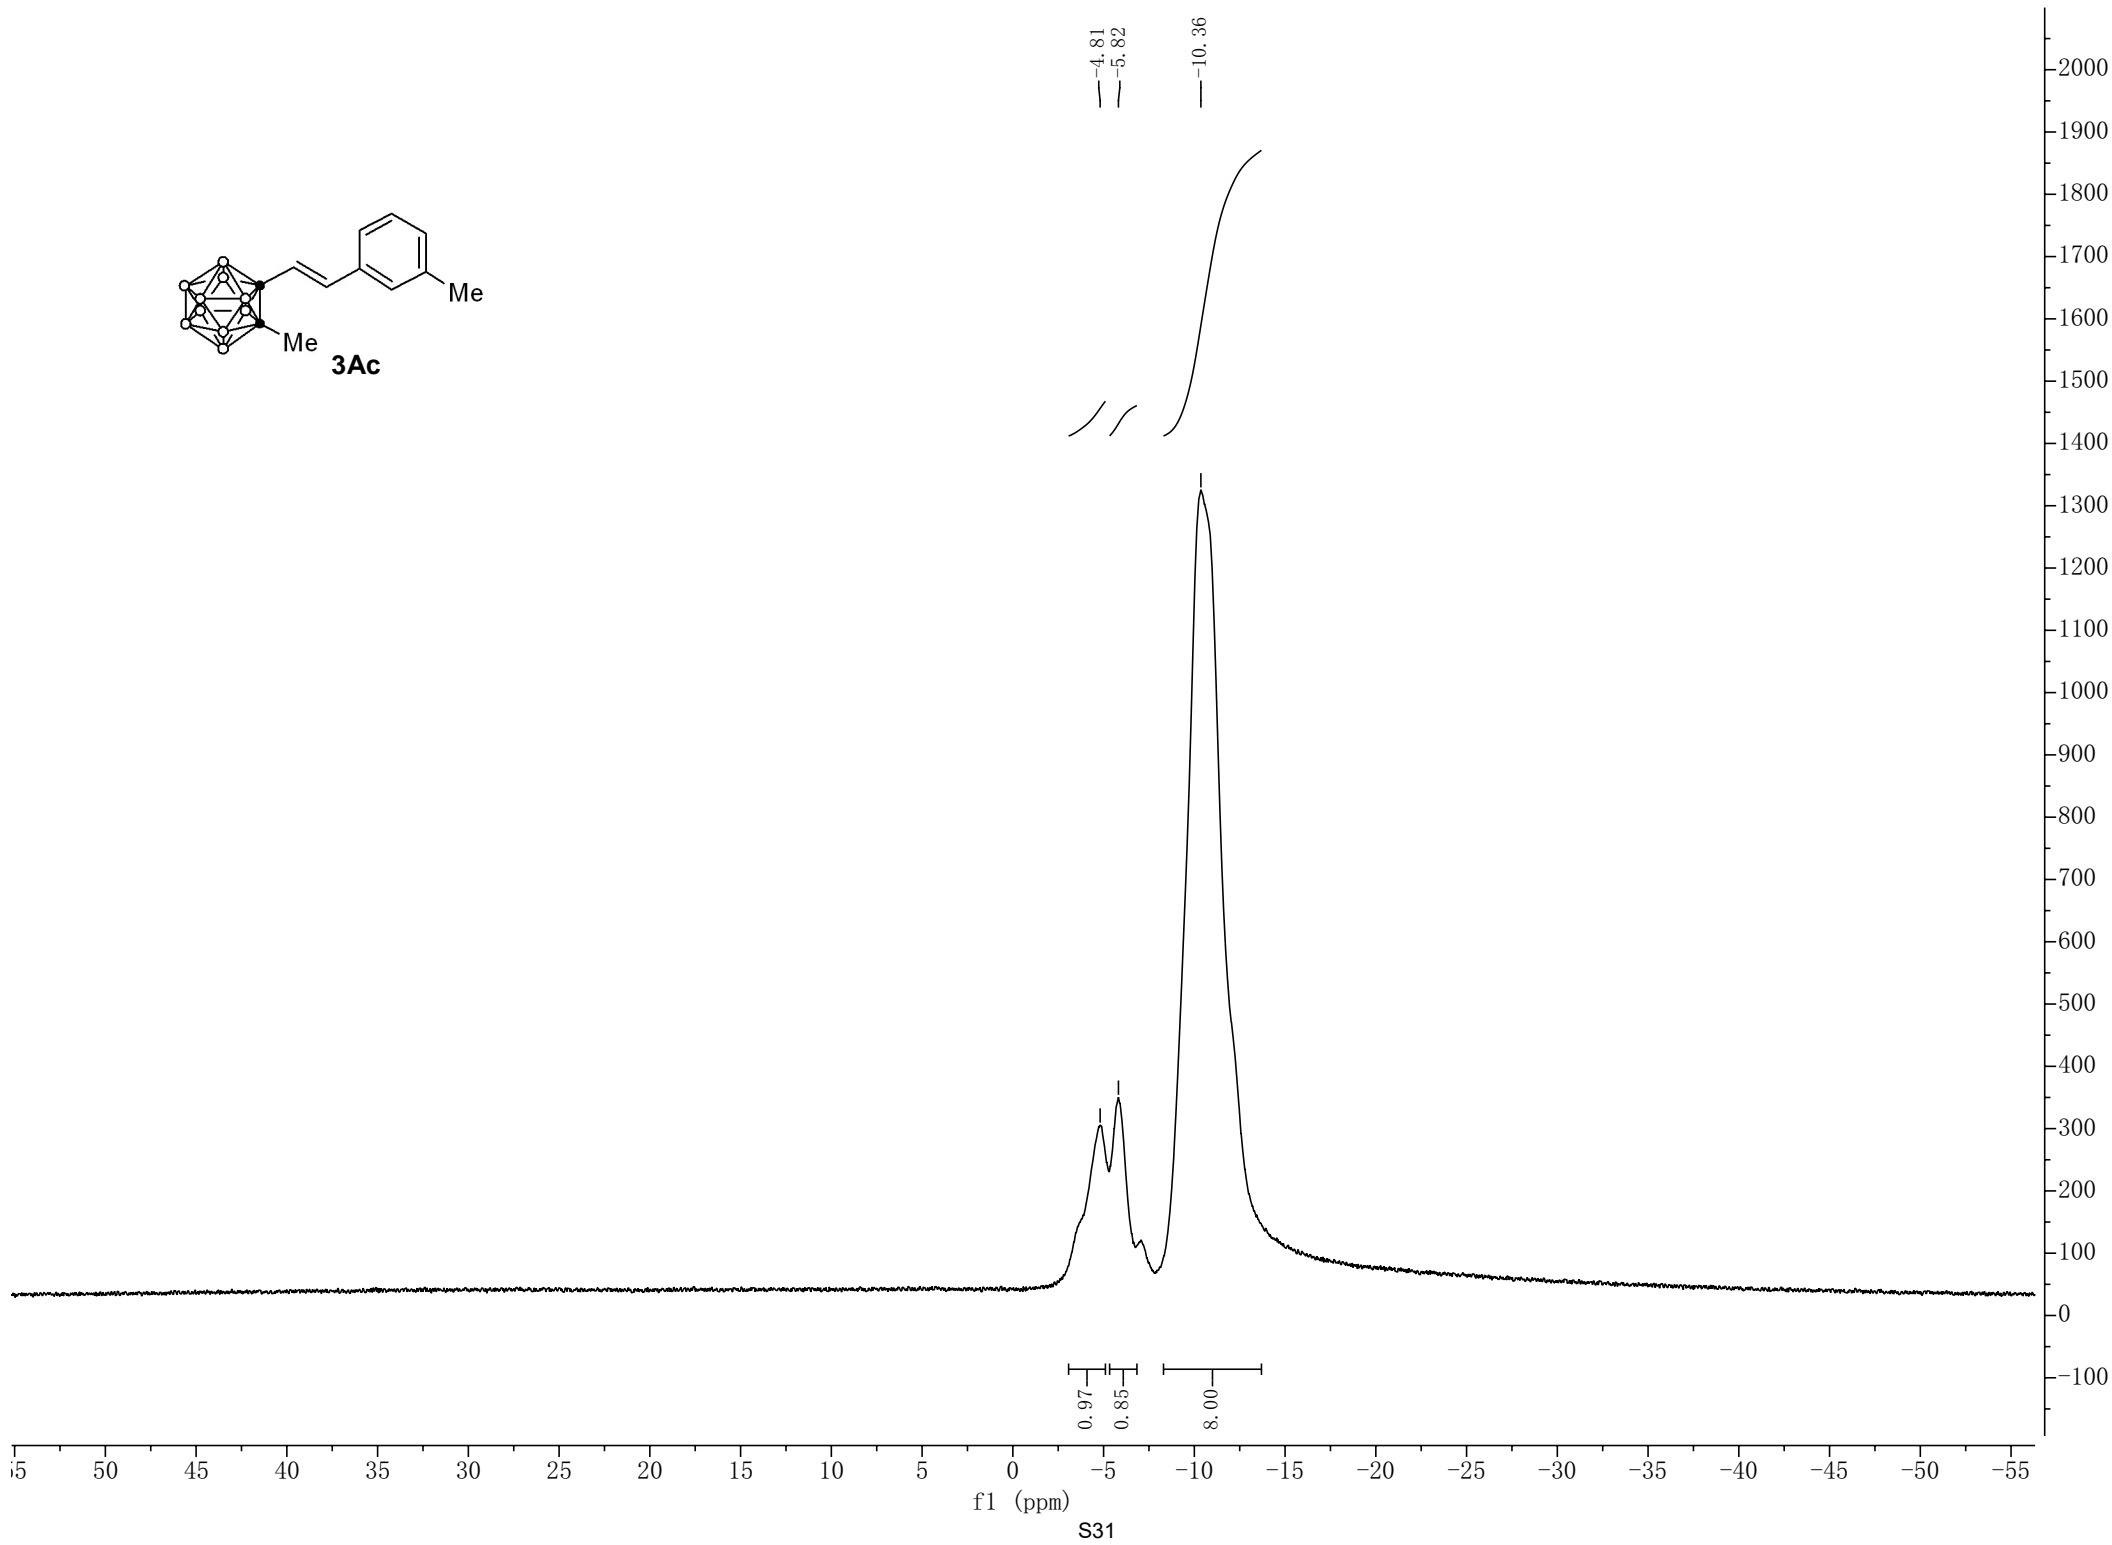

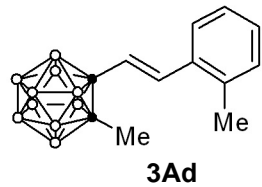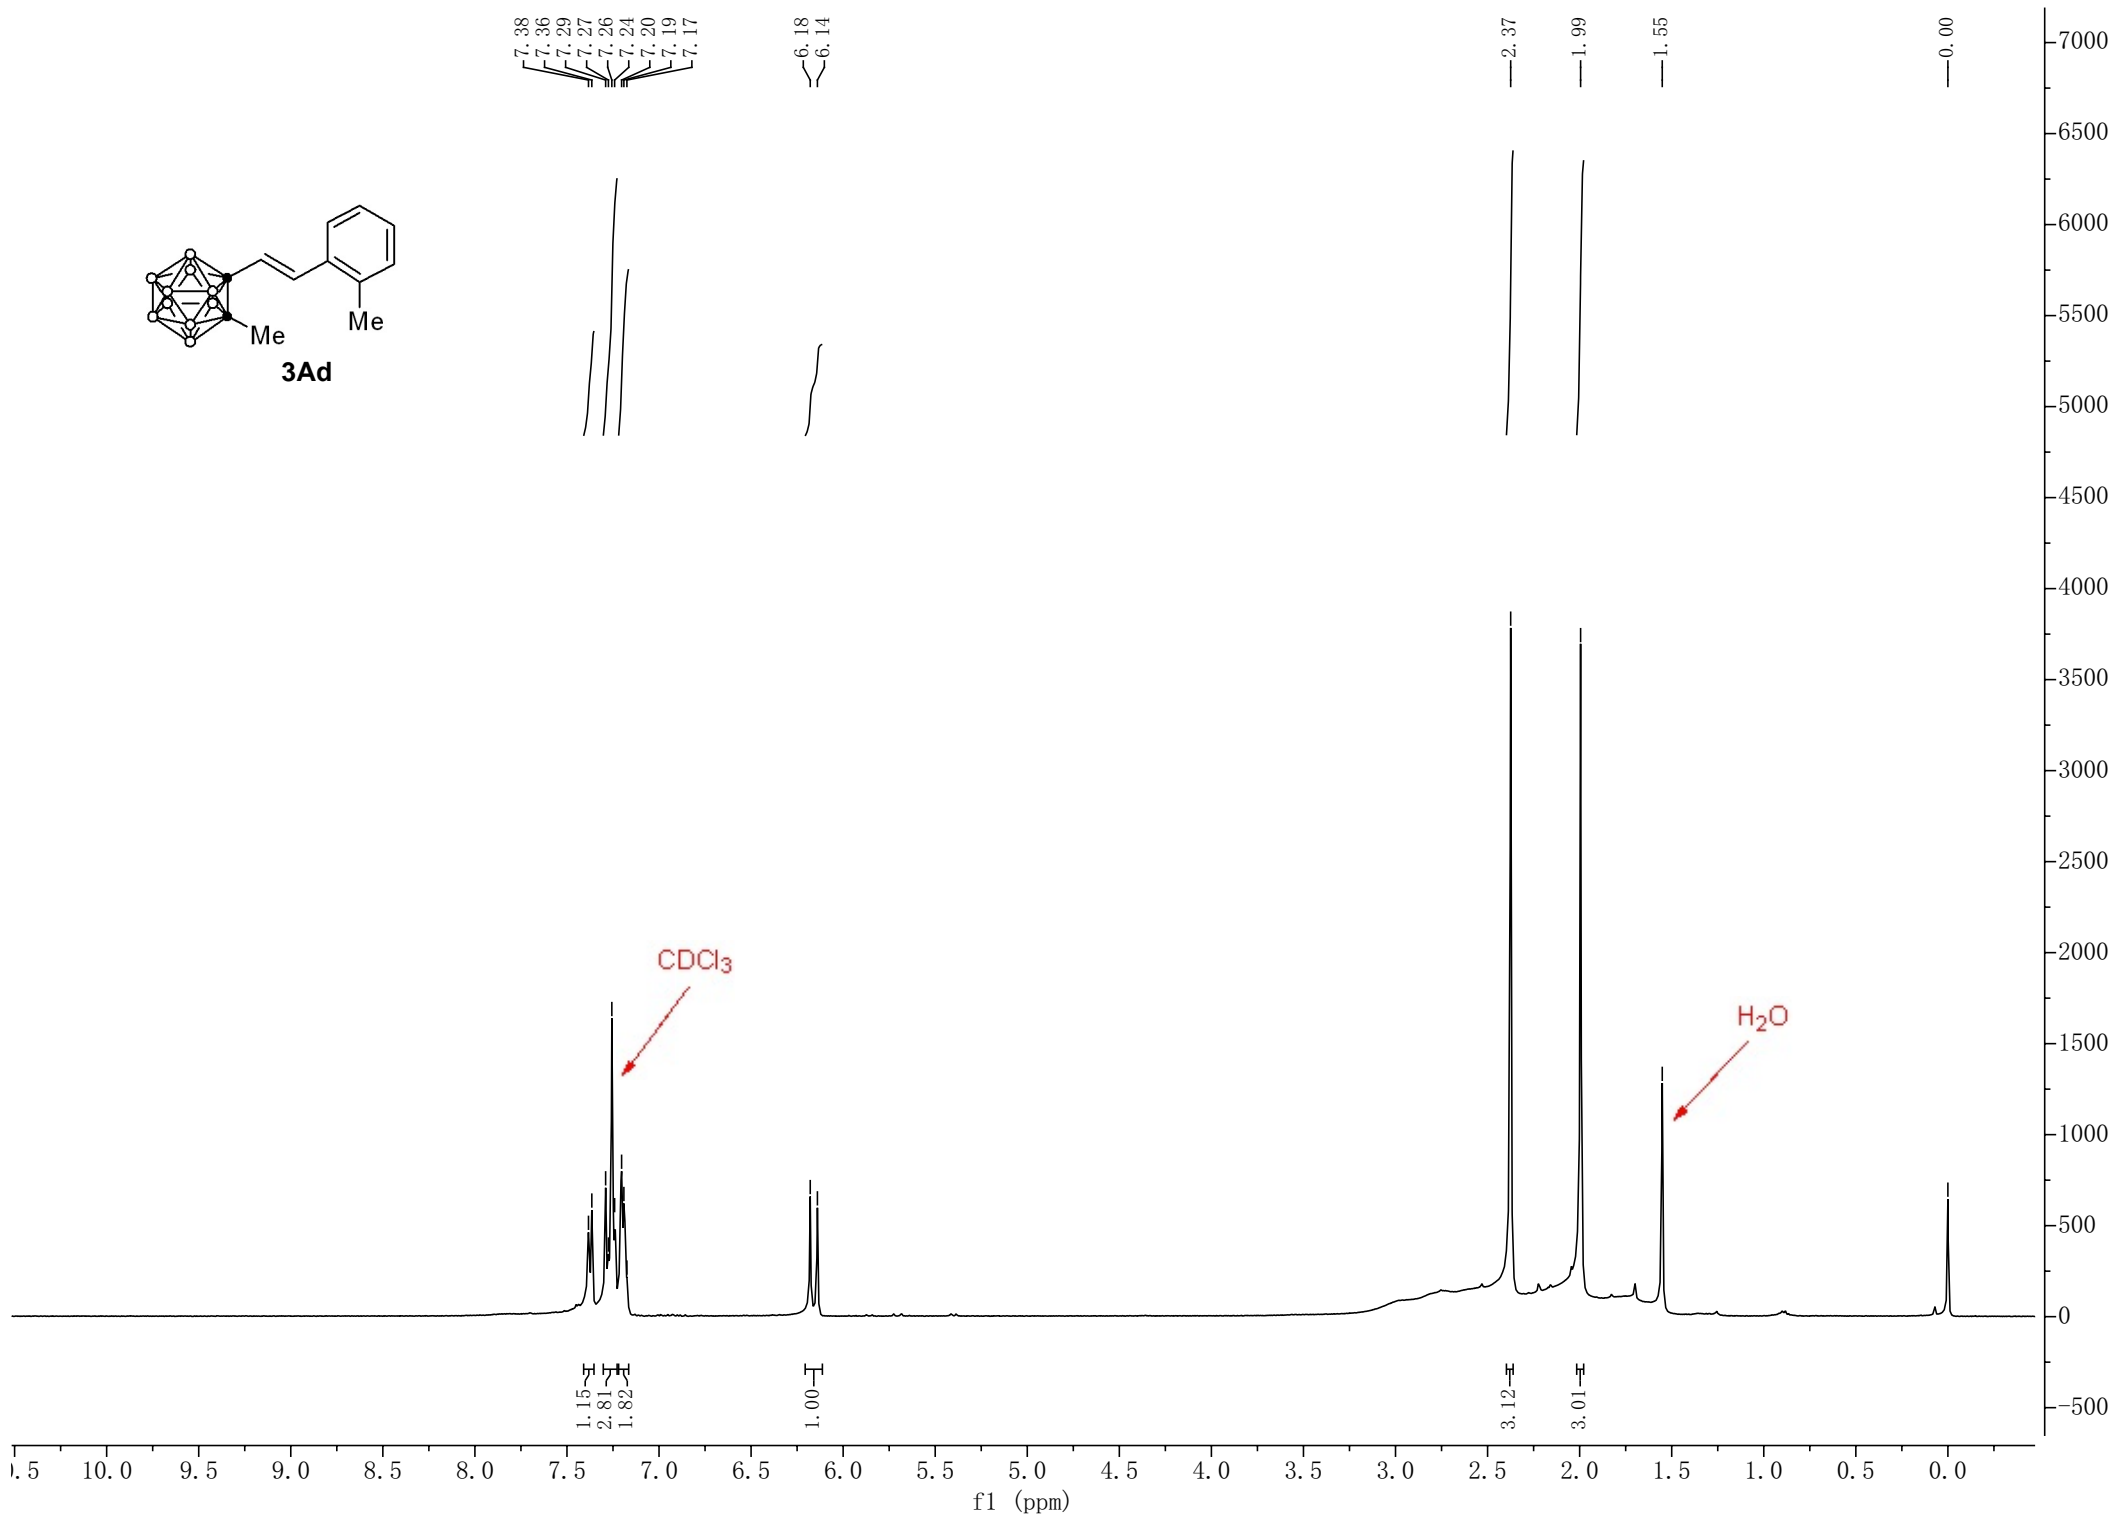



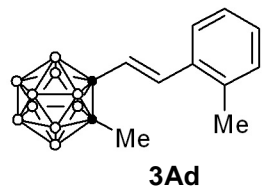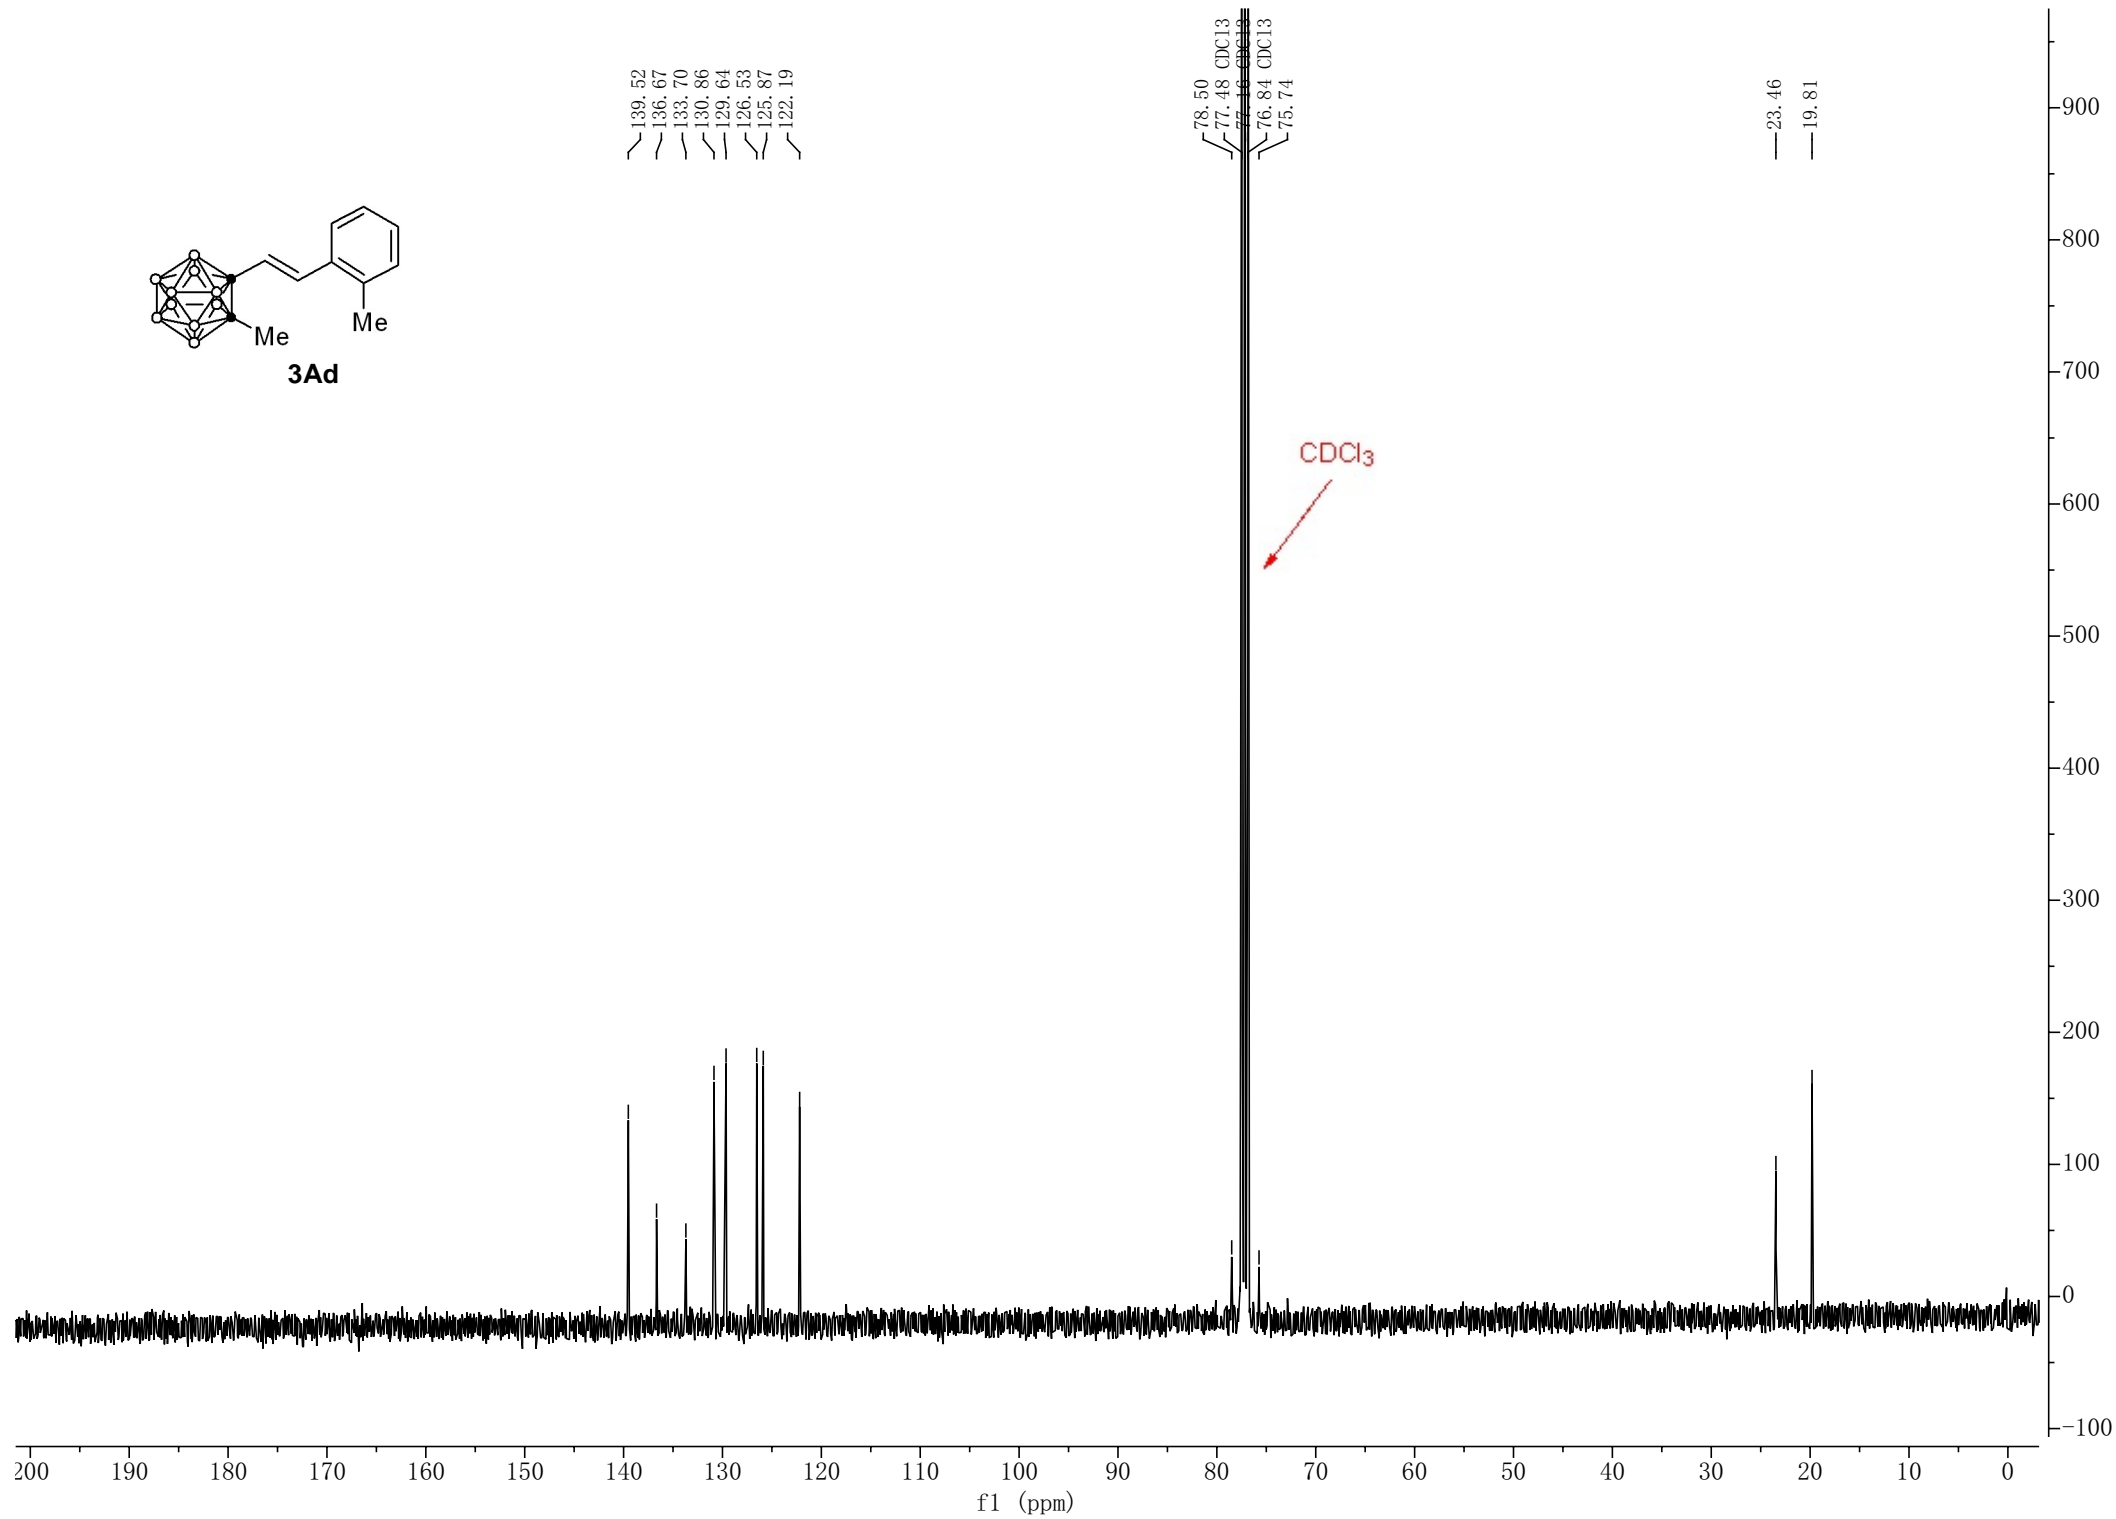

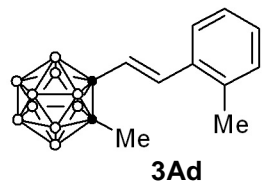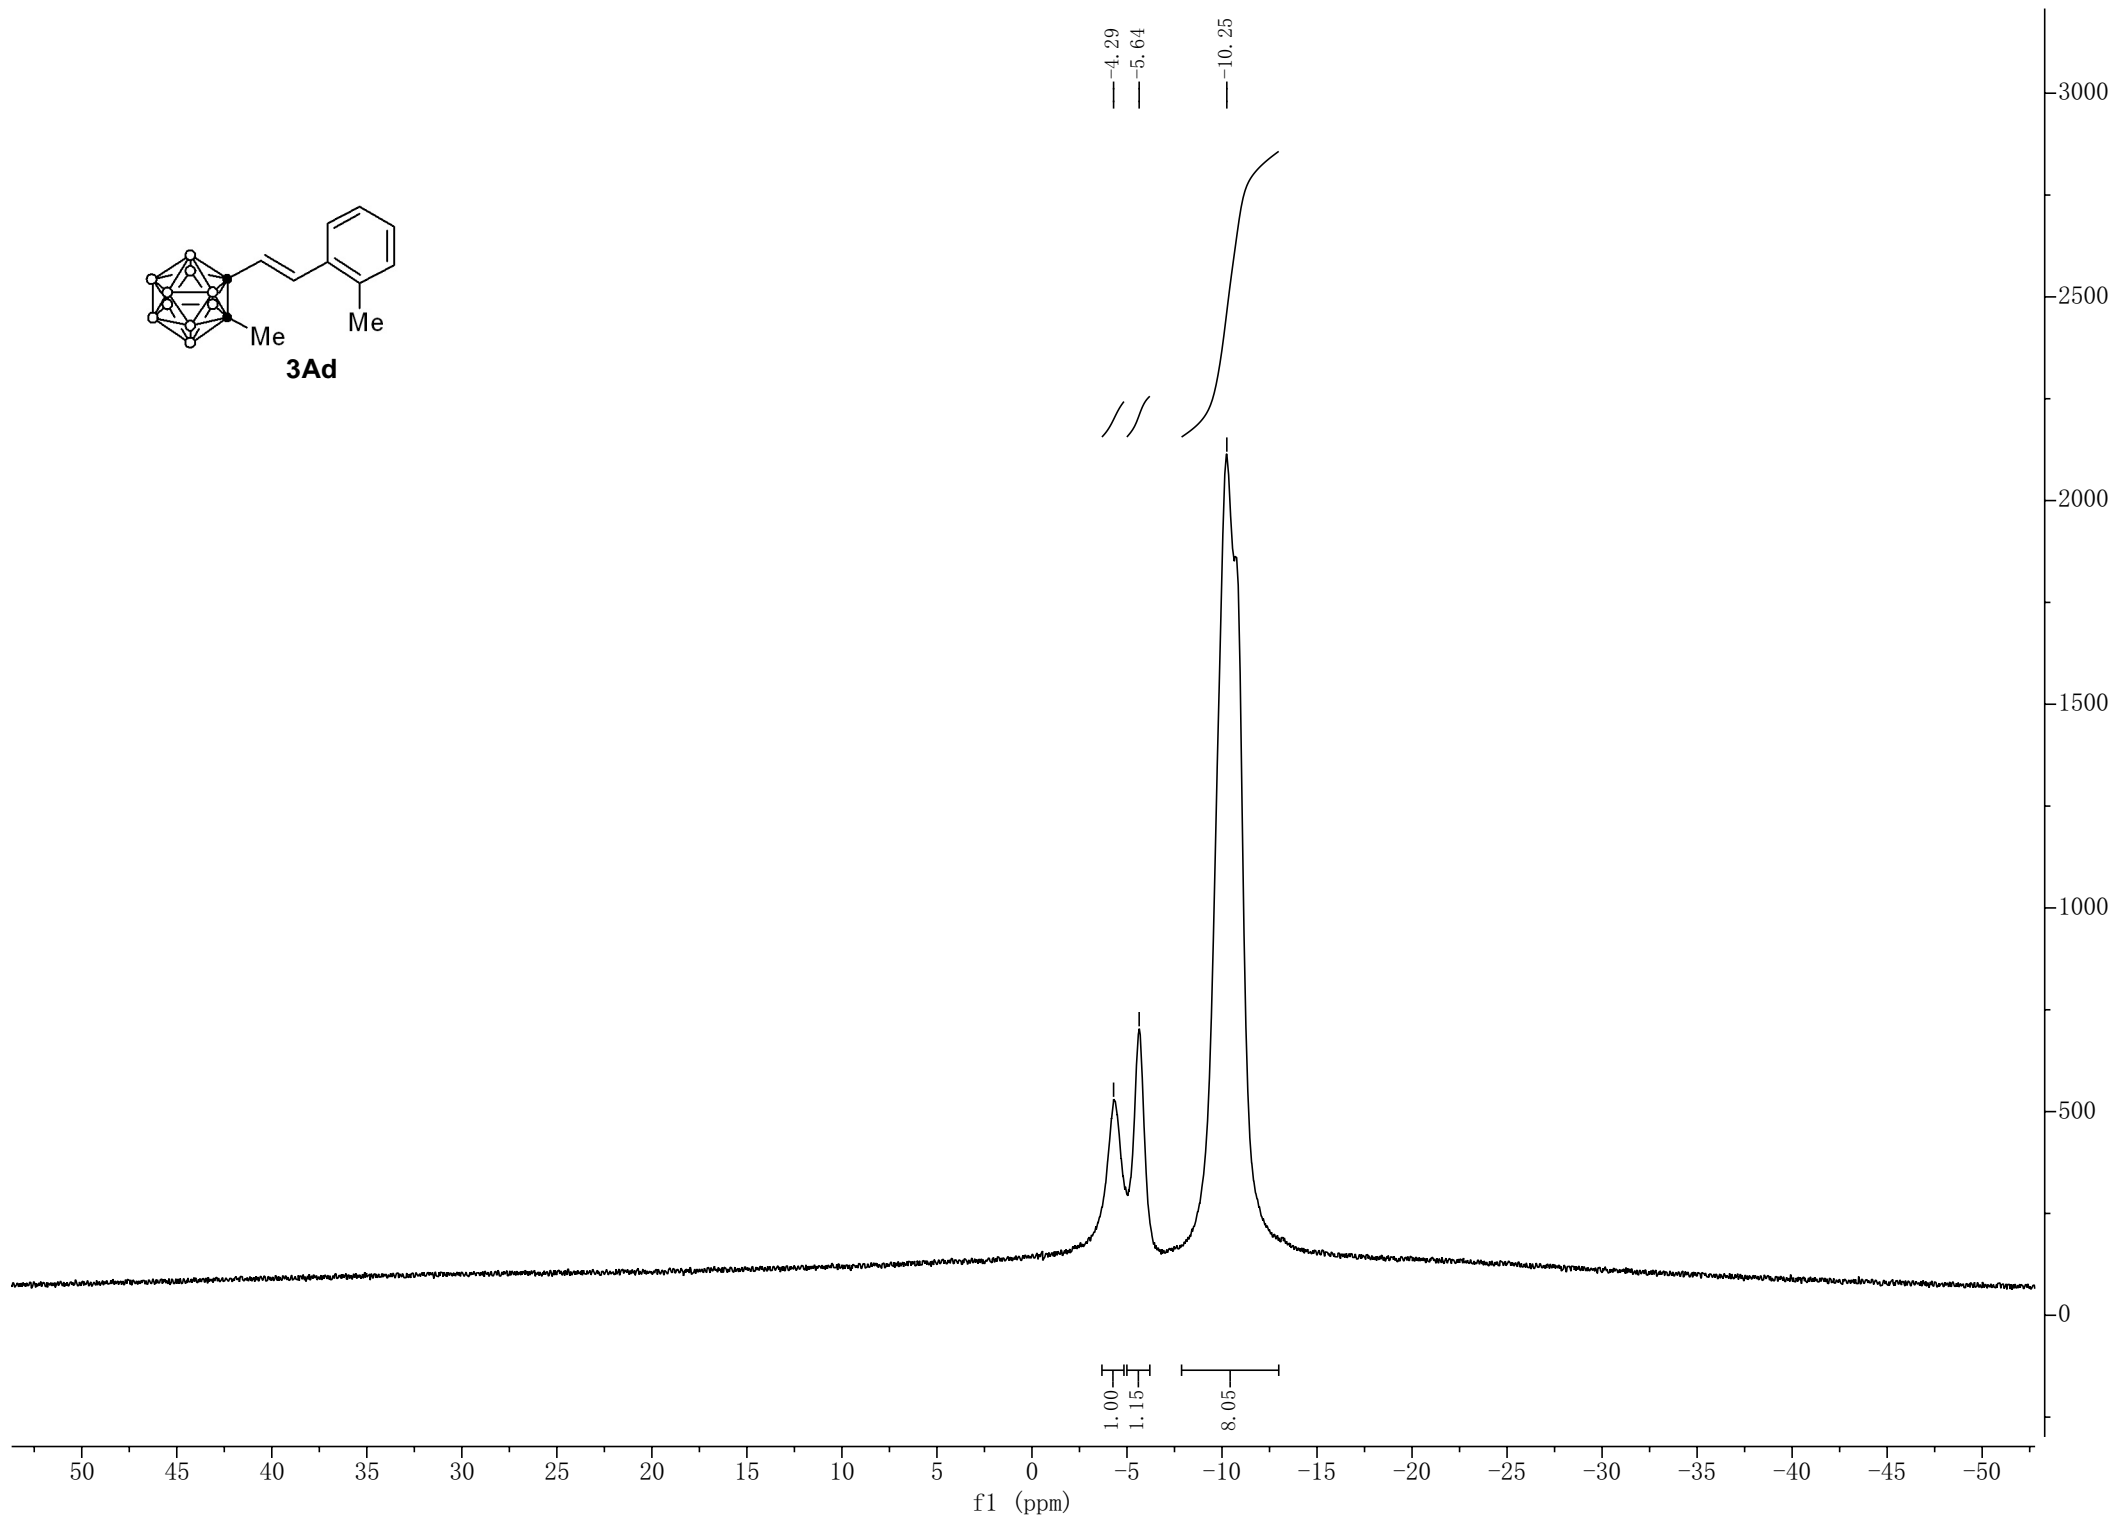

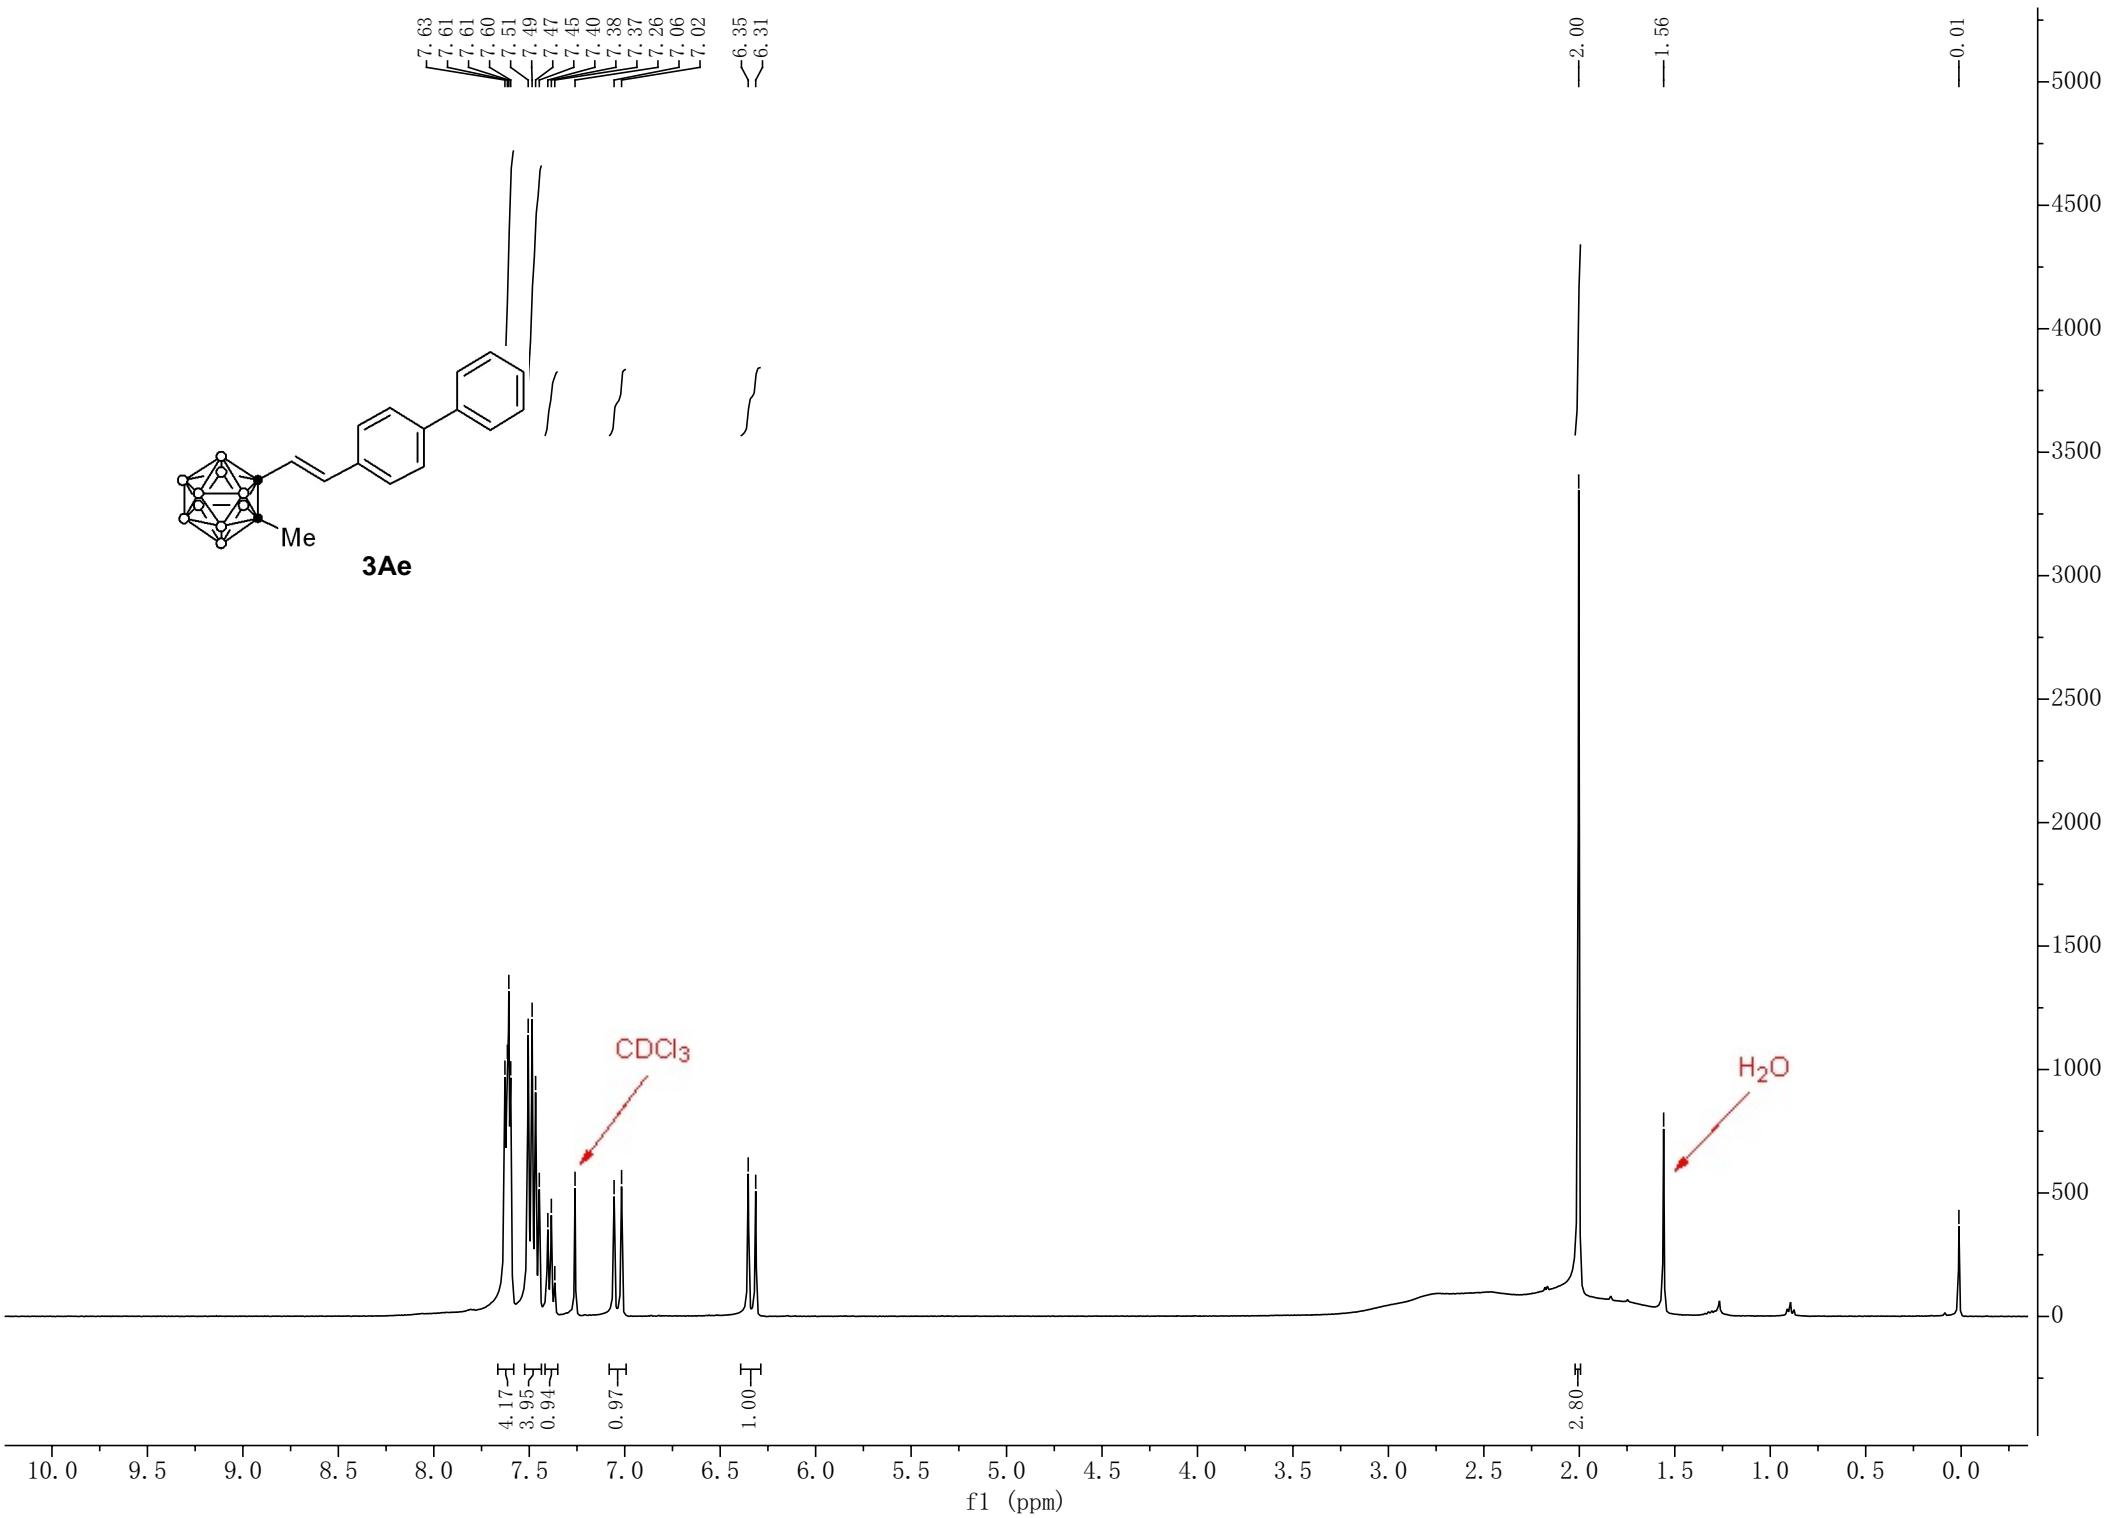

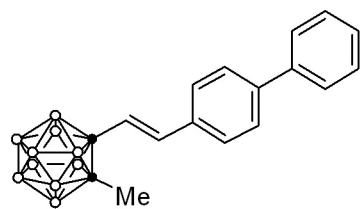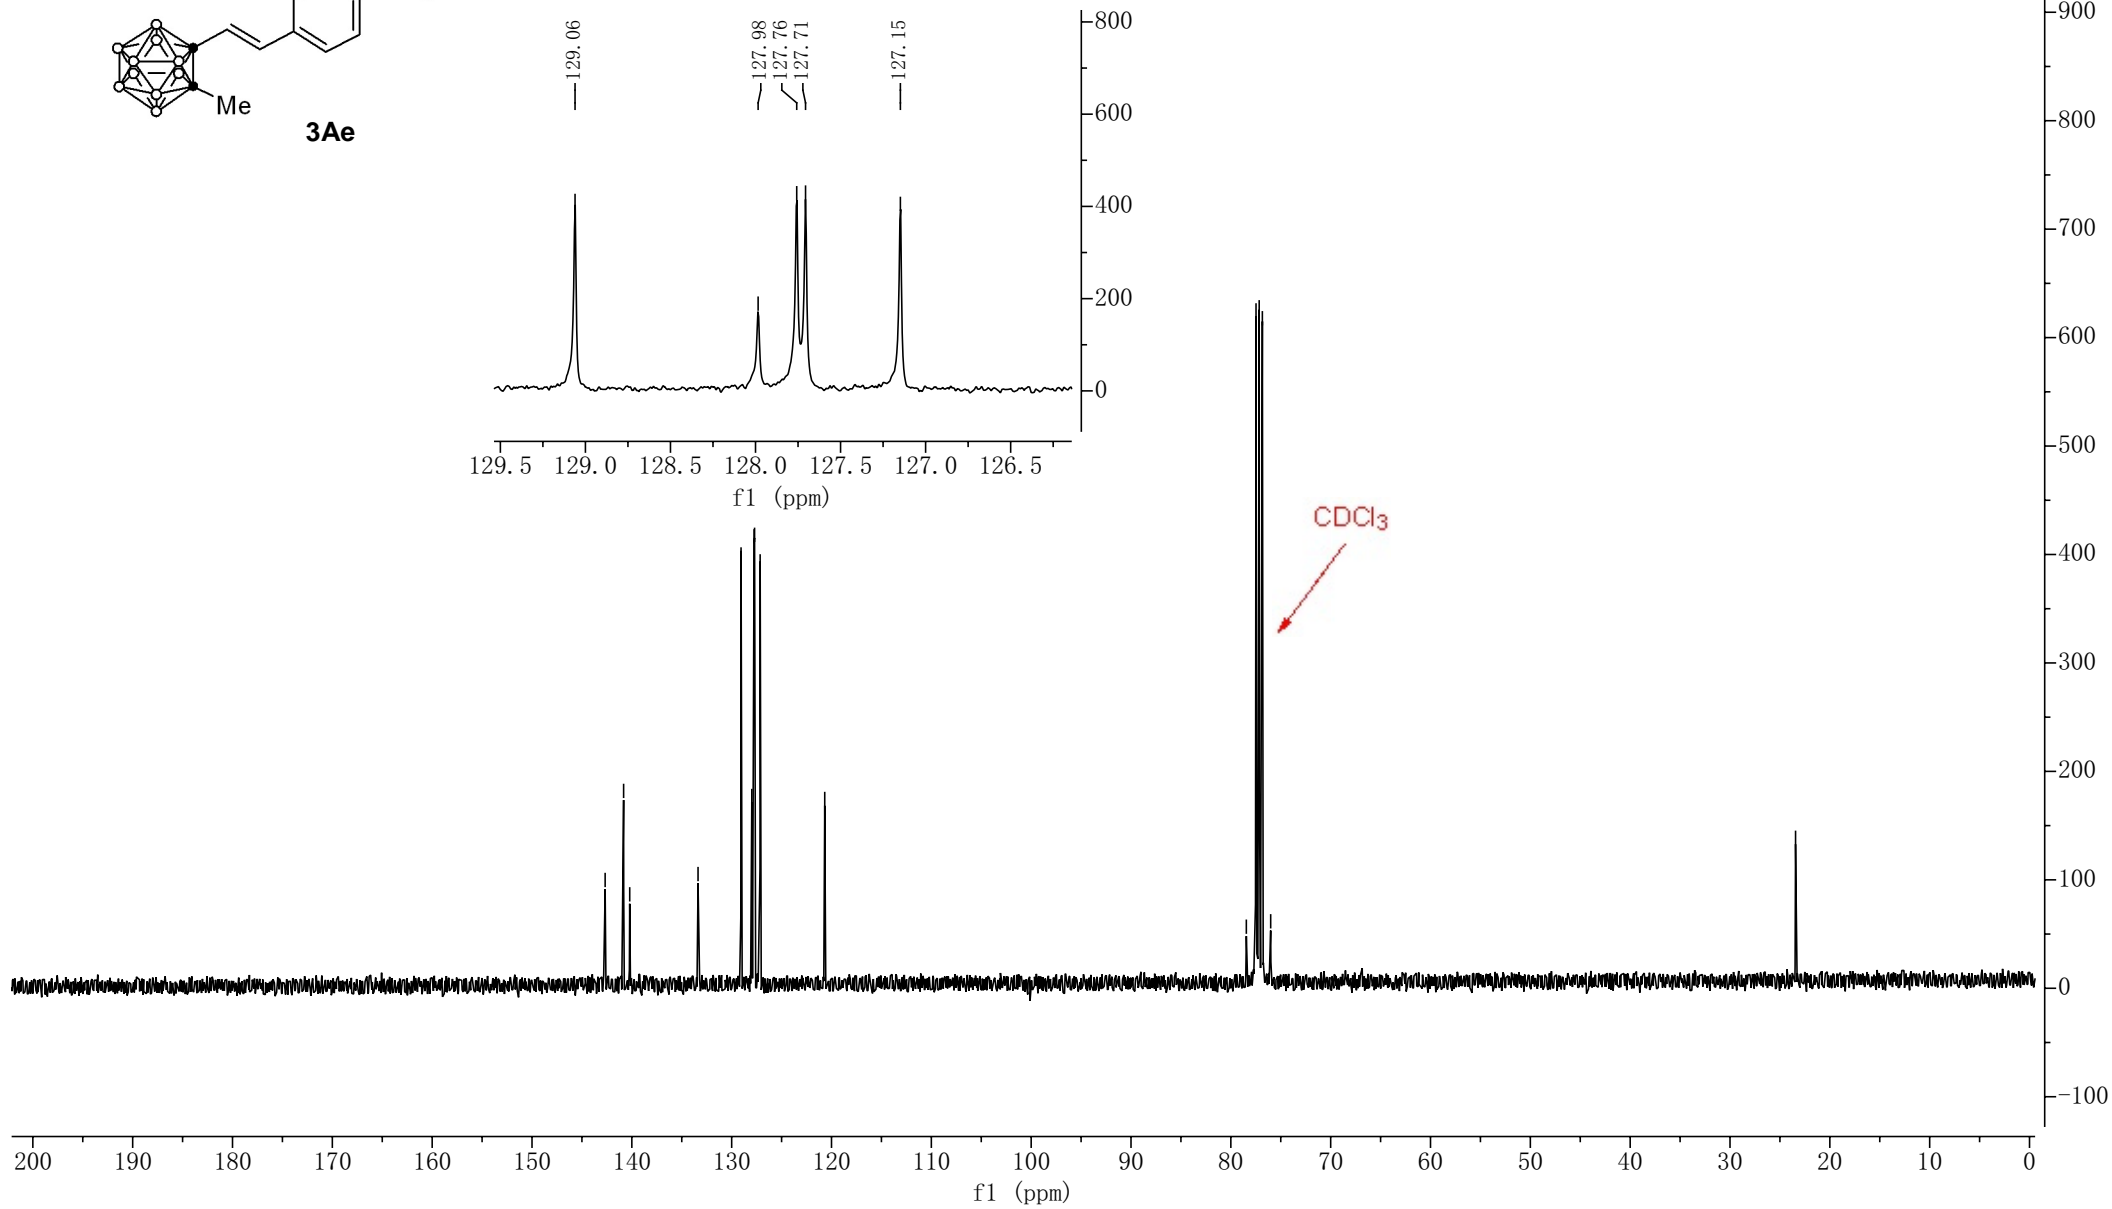

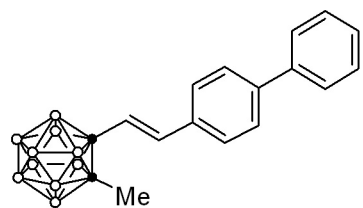

3Ae

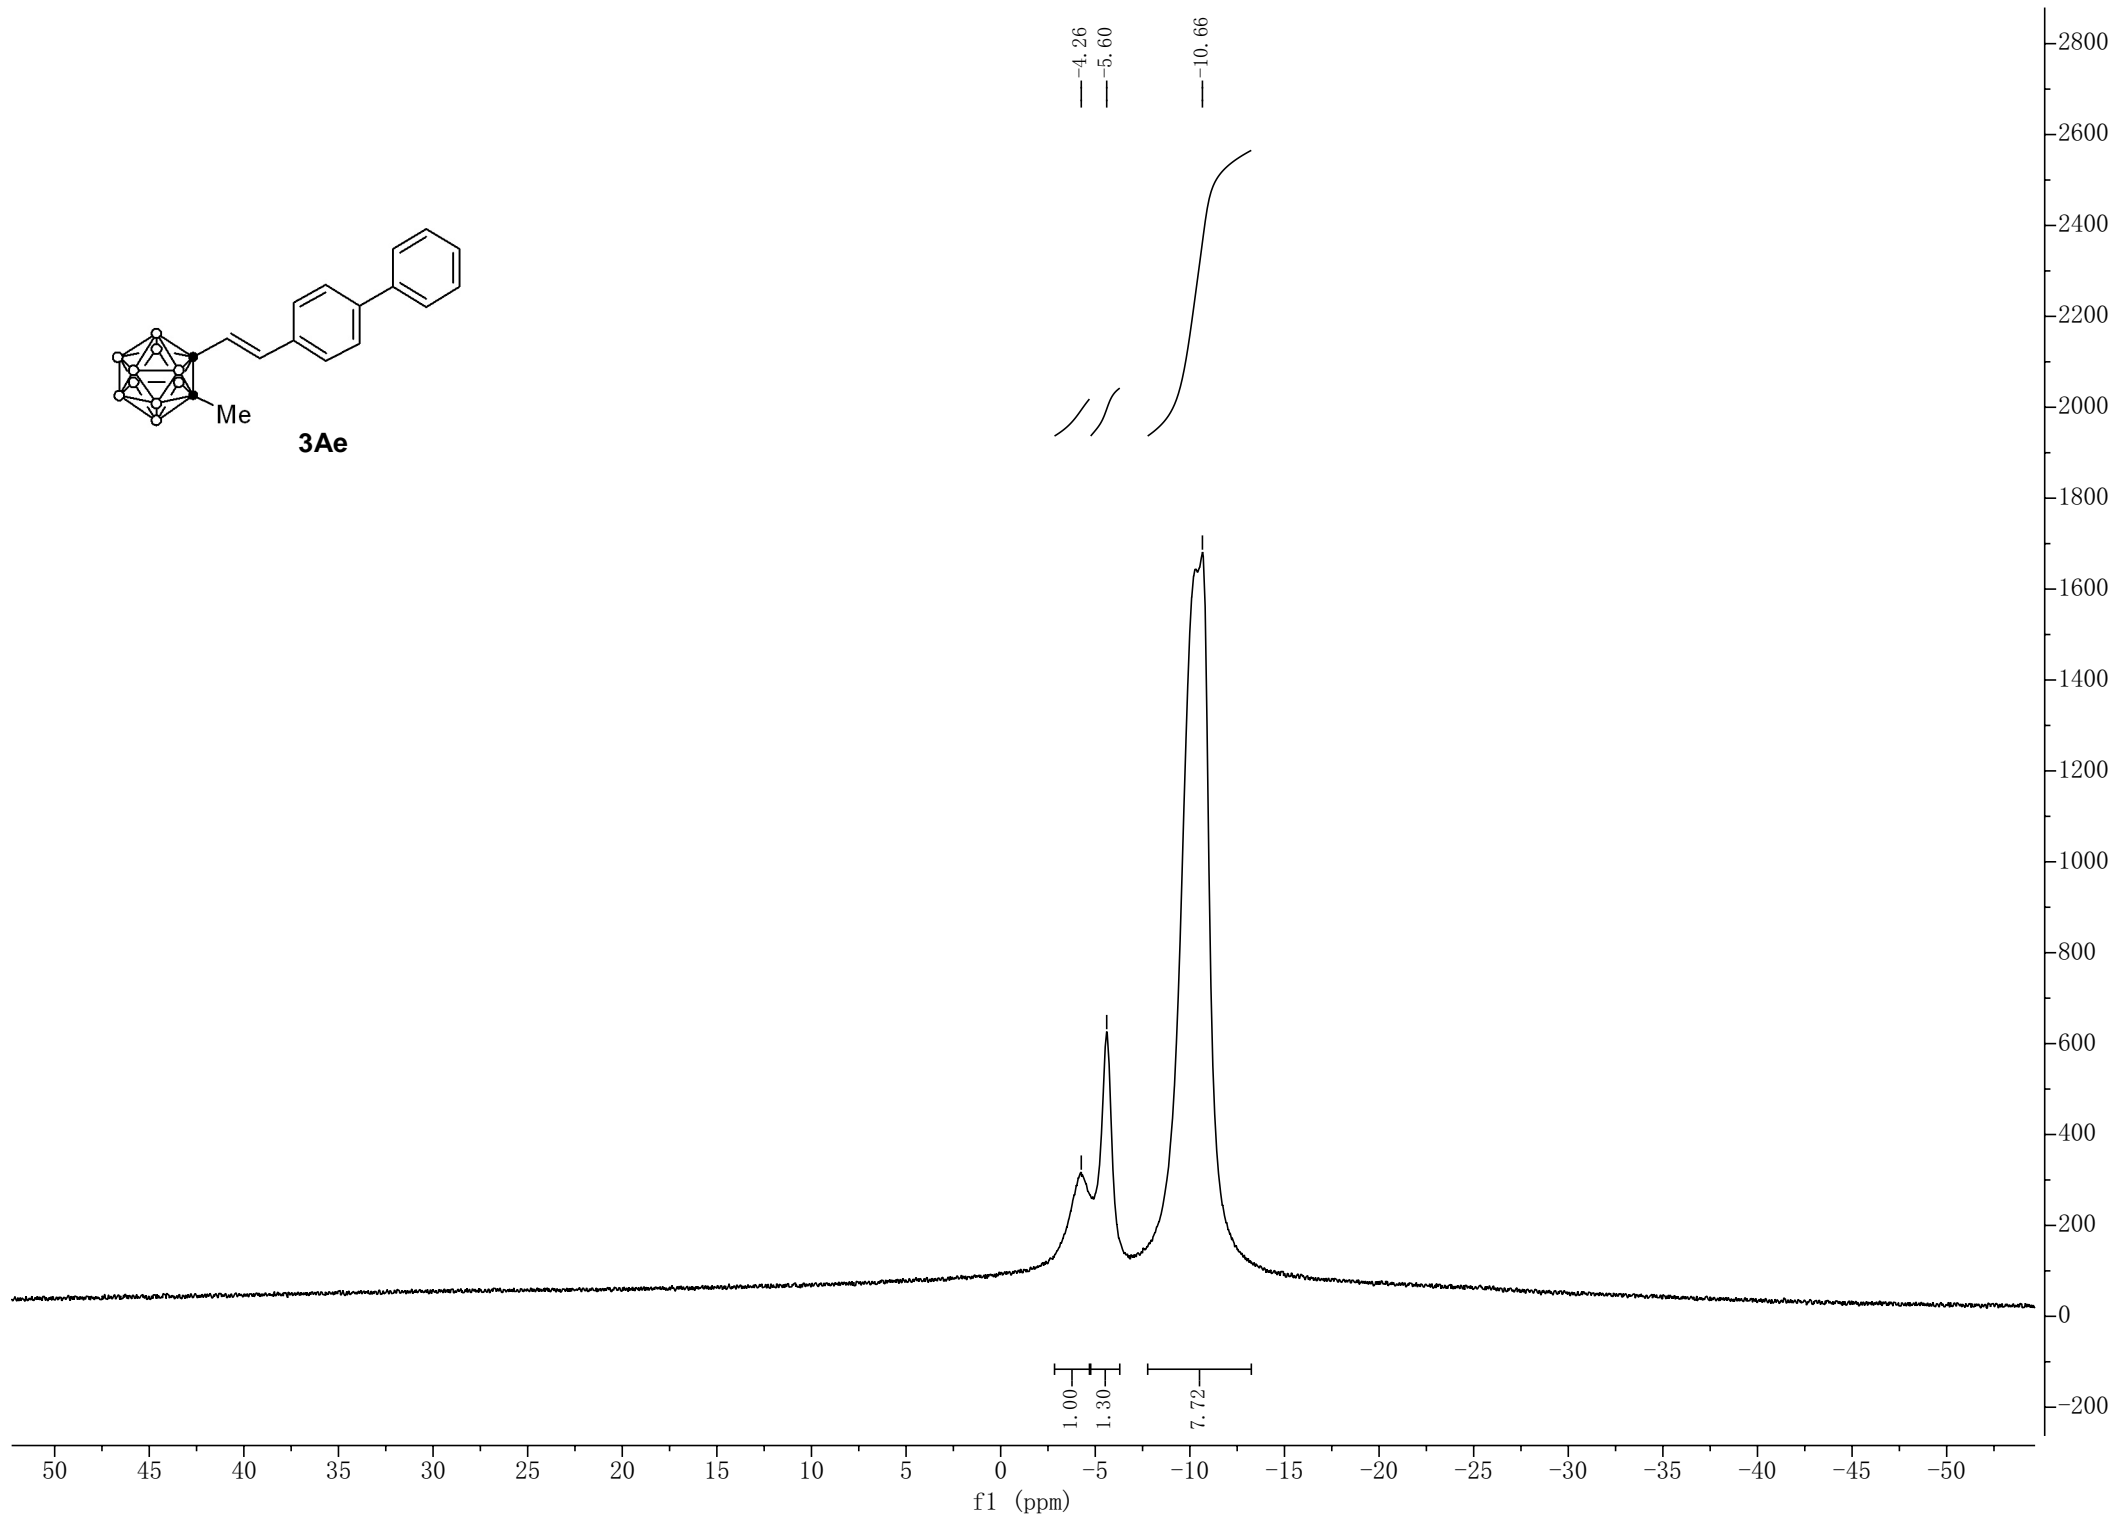

-4.26  
-5.60  
-10.66

1.00  
1.30  
7.72

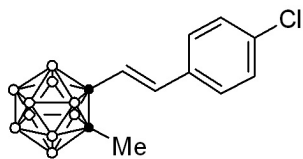

3Af

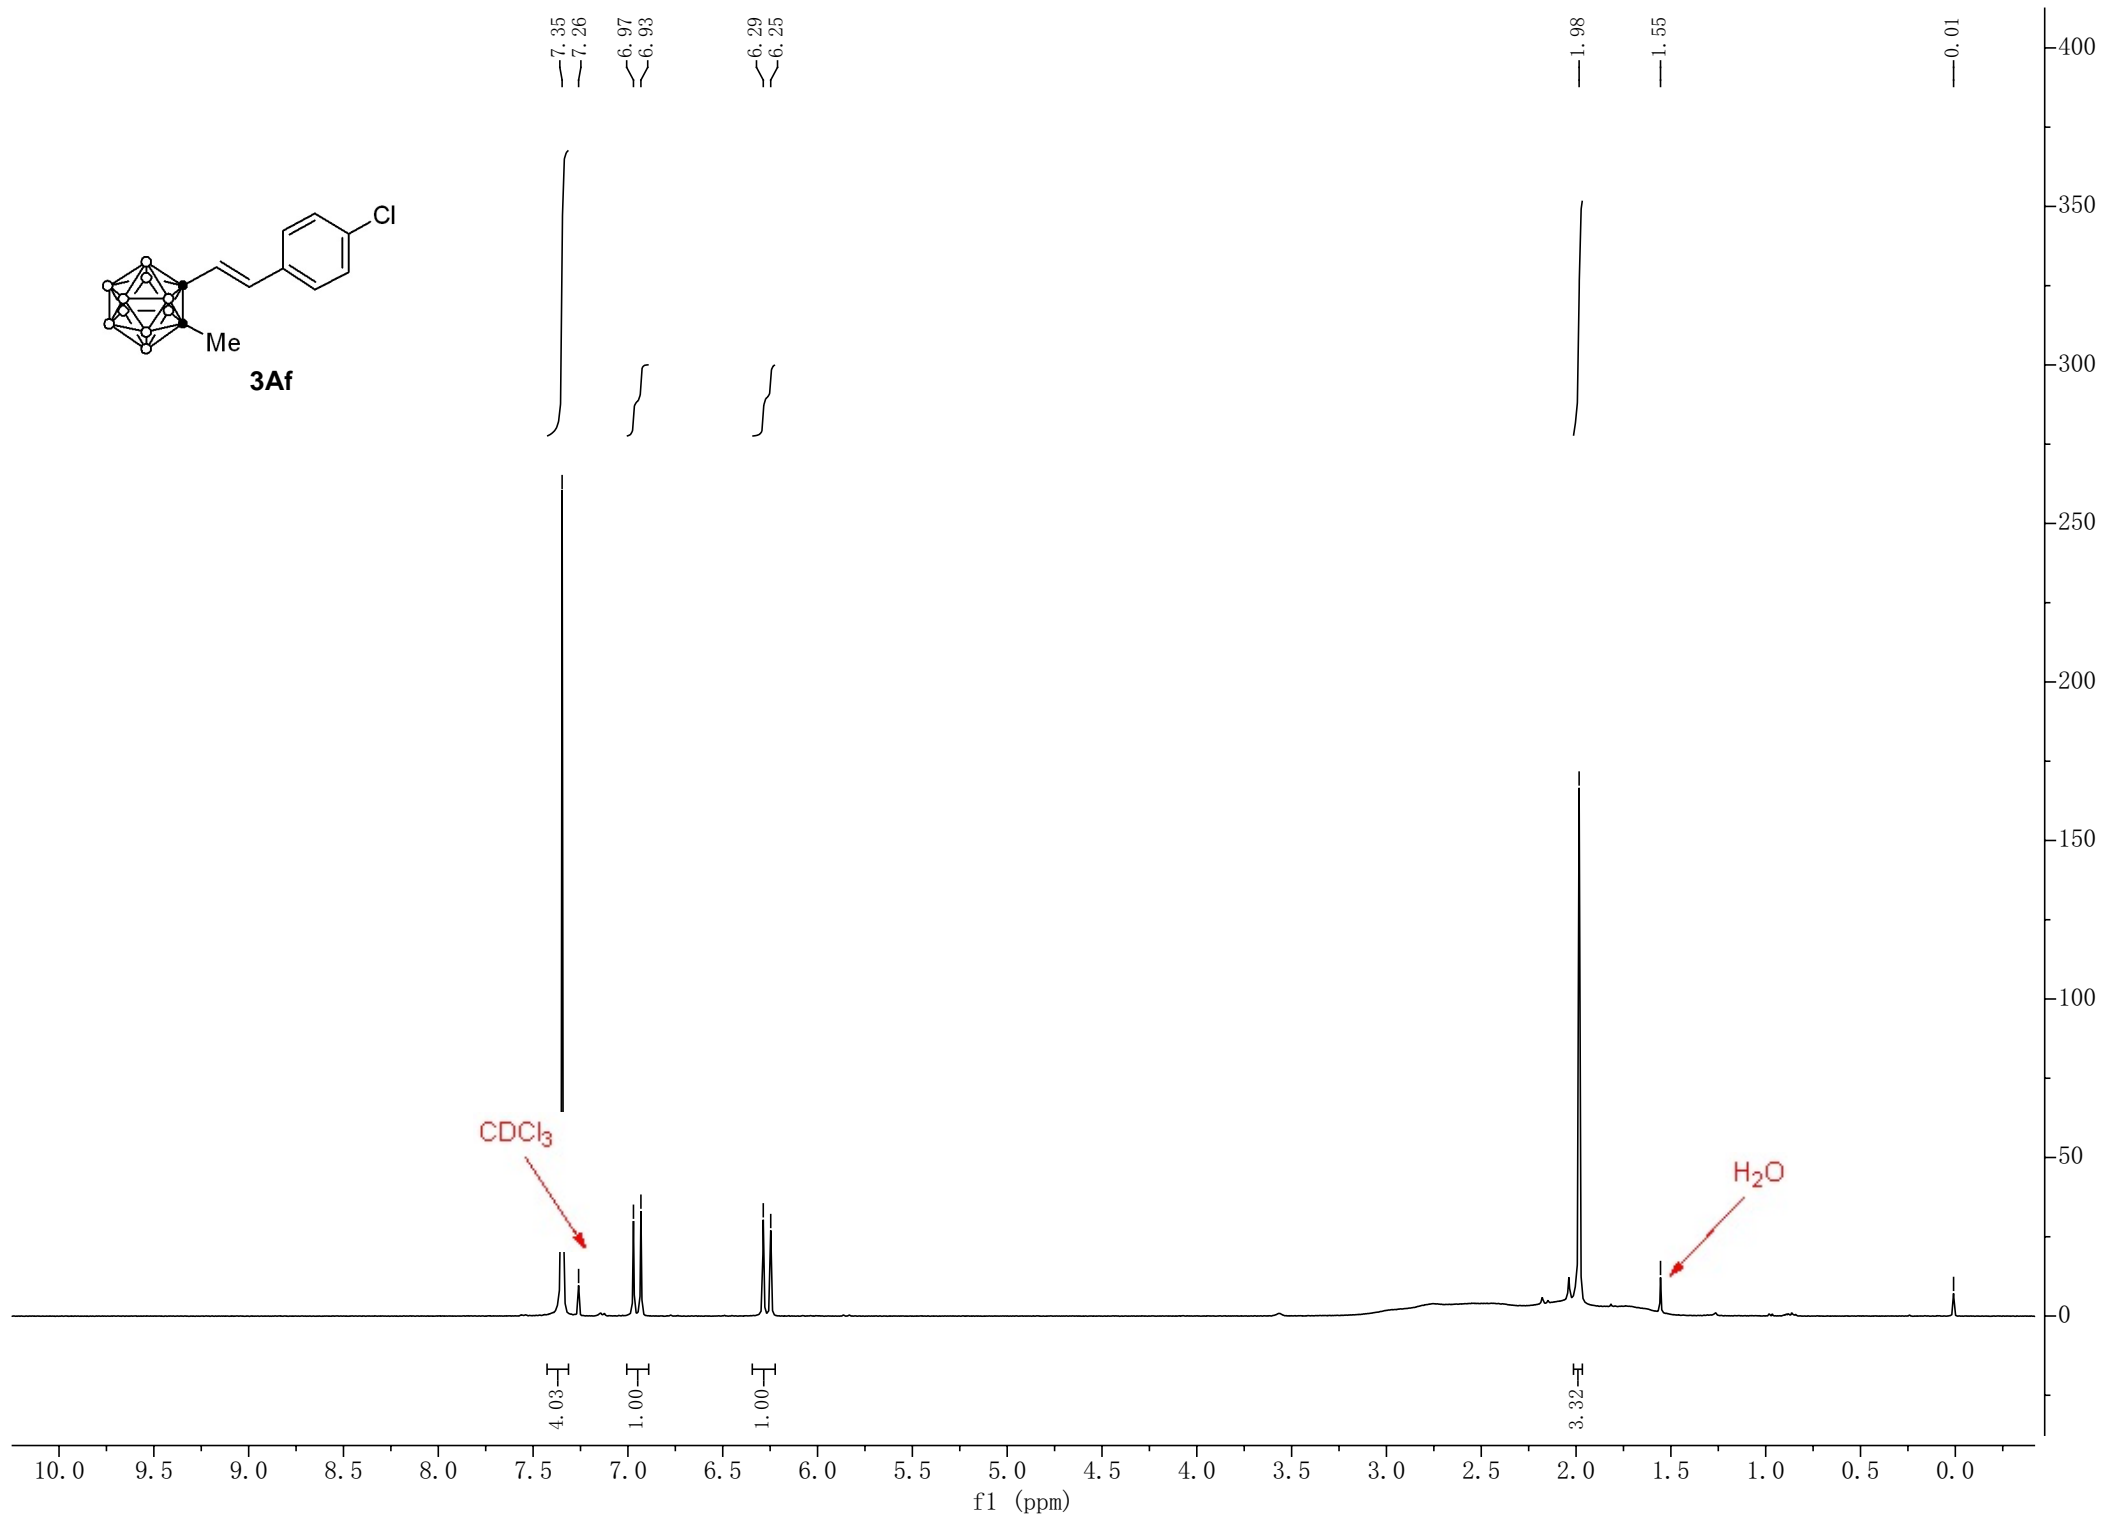

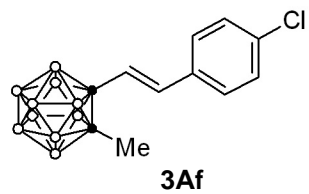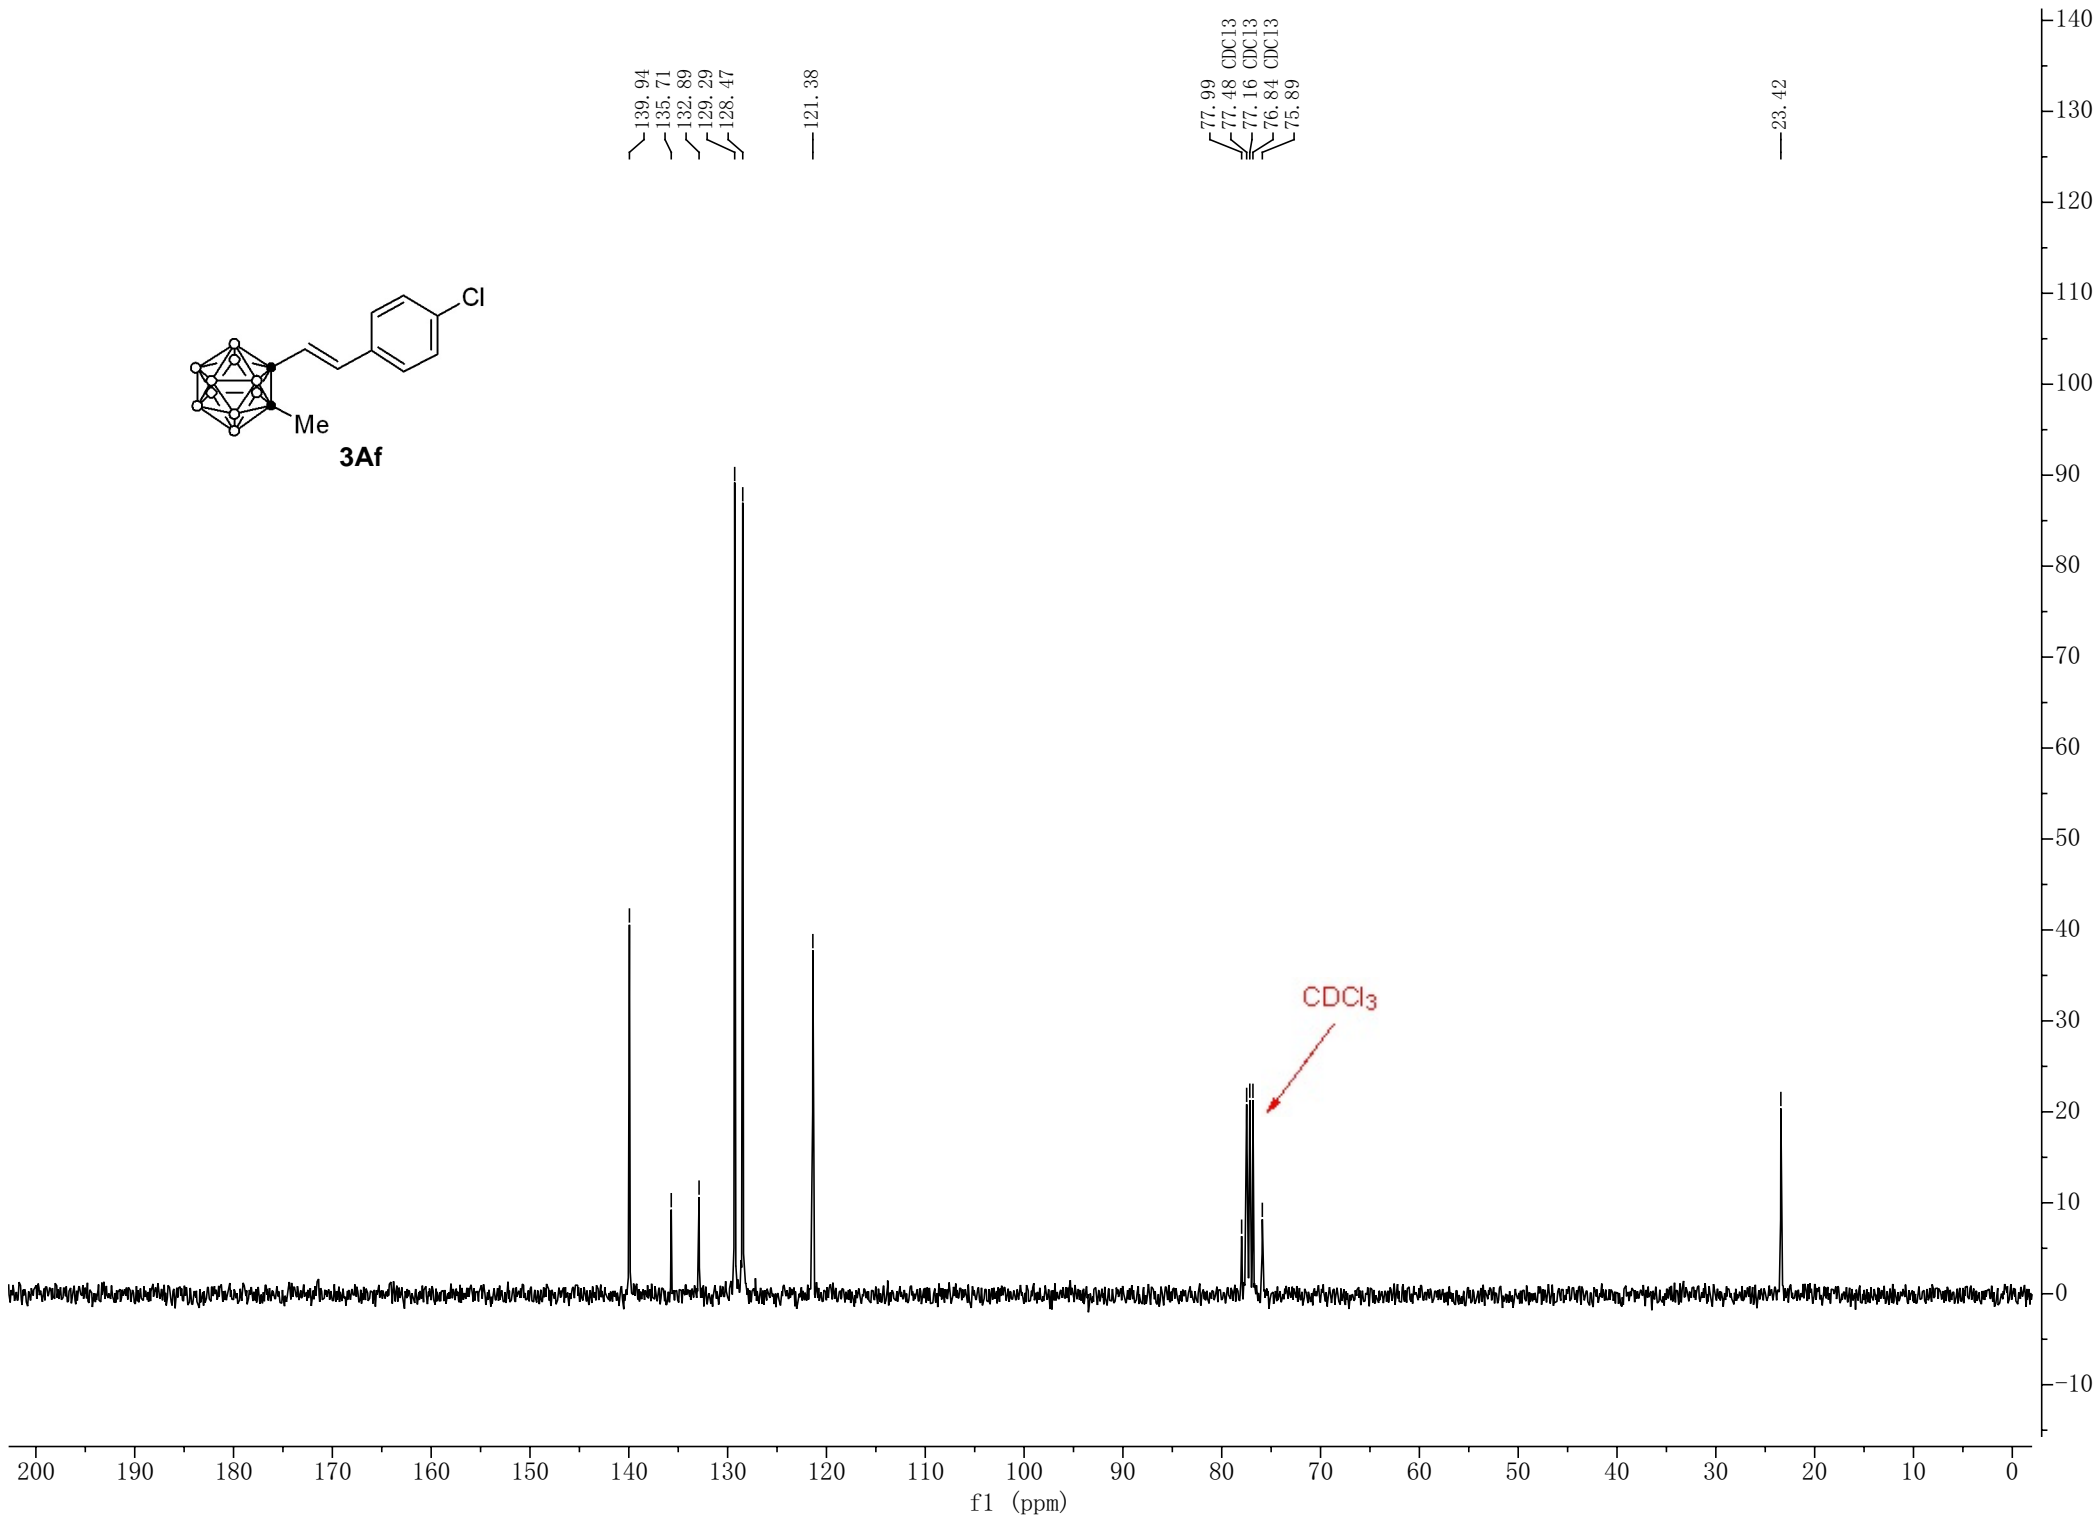

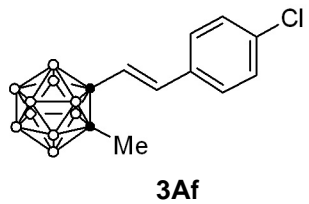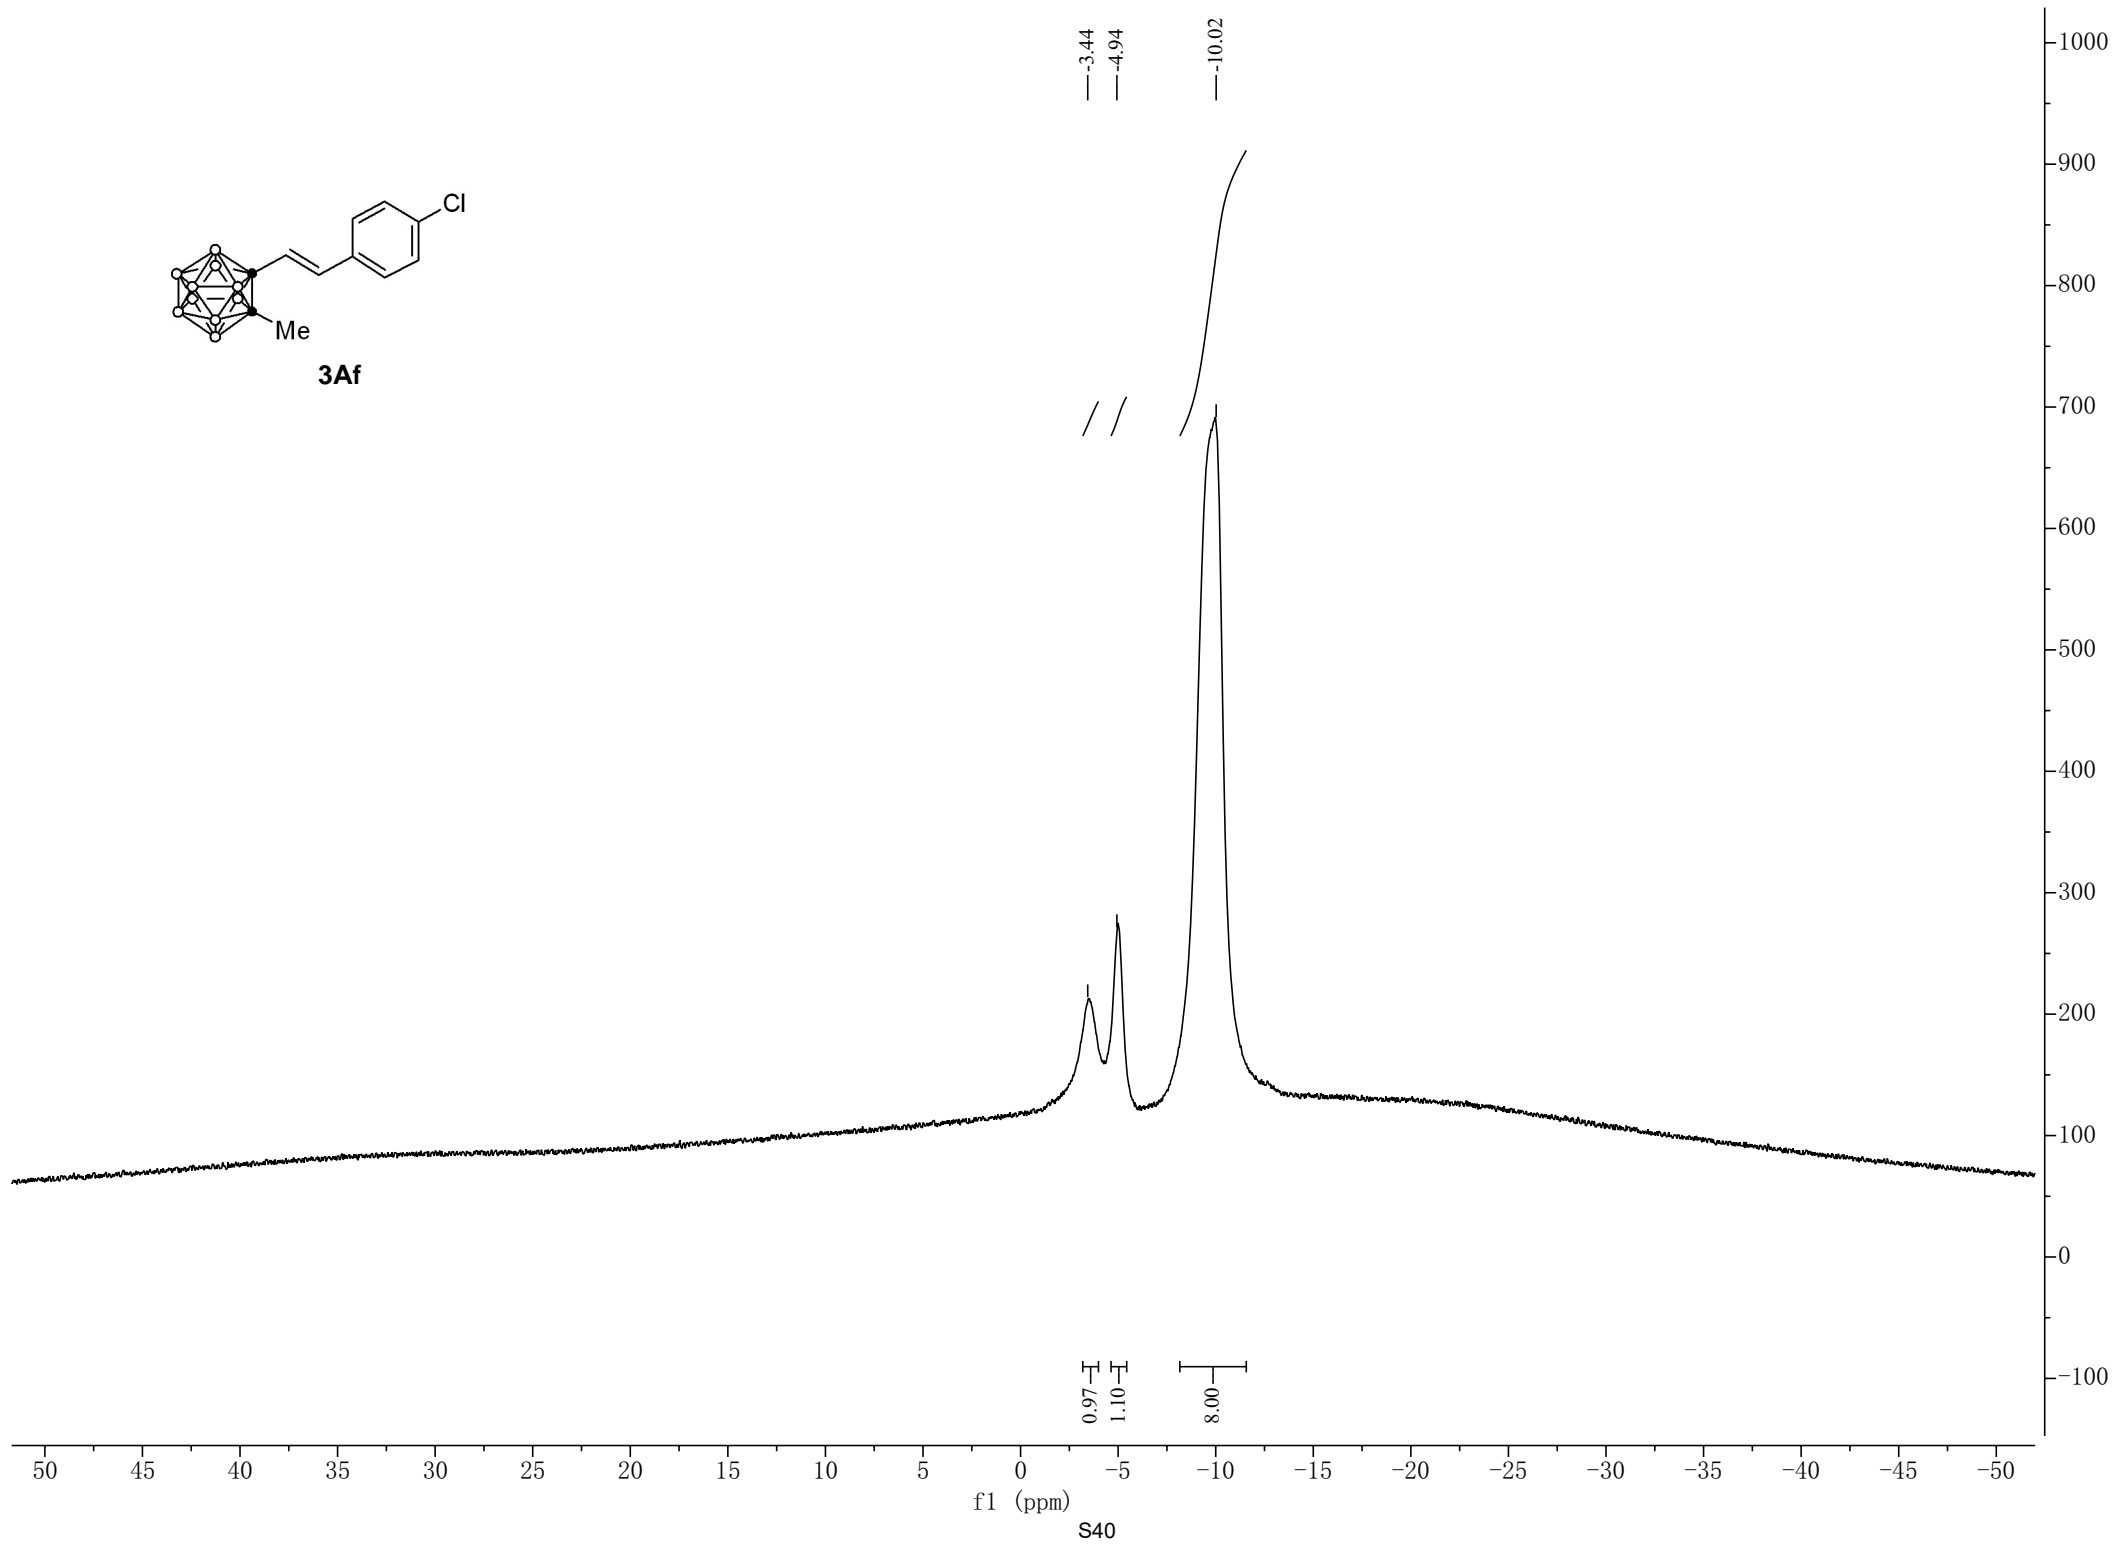



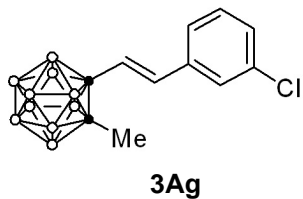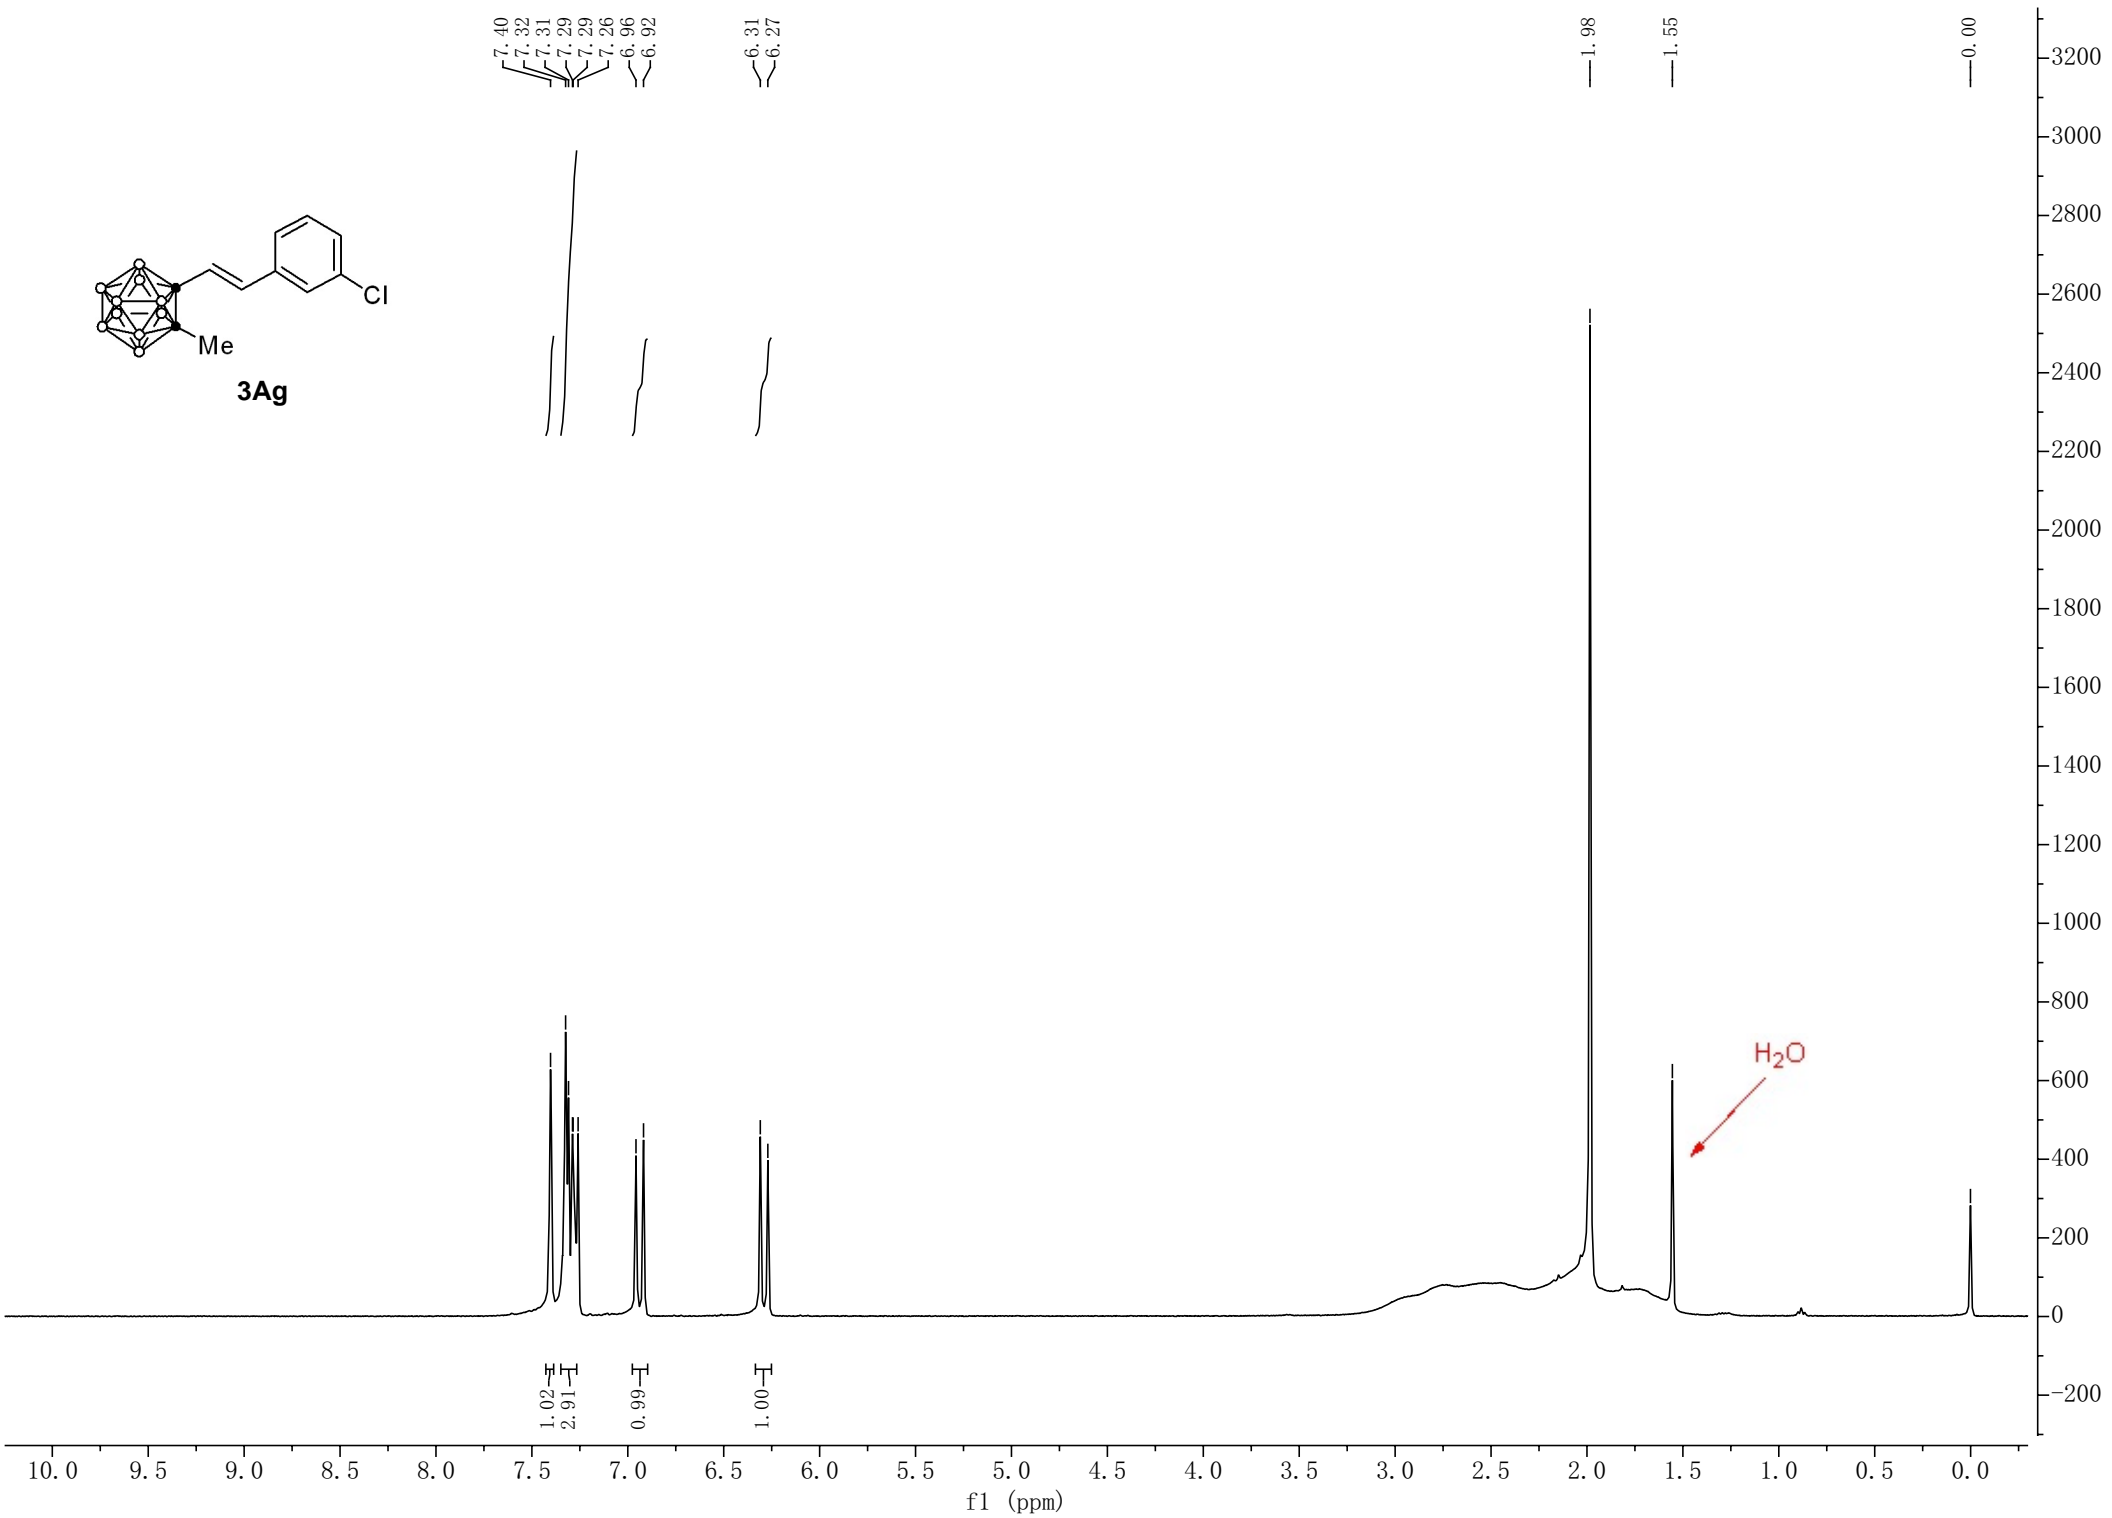

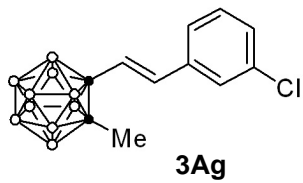

139.79  
136.20  
135.10  
130.32  
129.75  
126.99  
125.62  
122.28

77.69  
77.48  
77.16  
76.84  
75.83

23.44

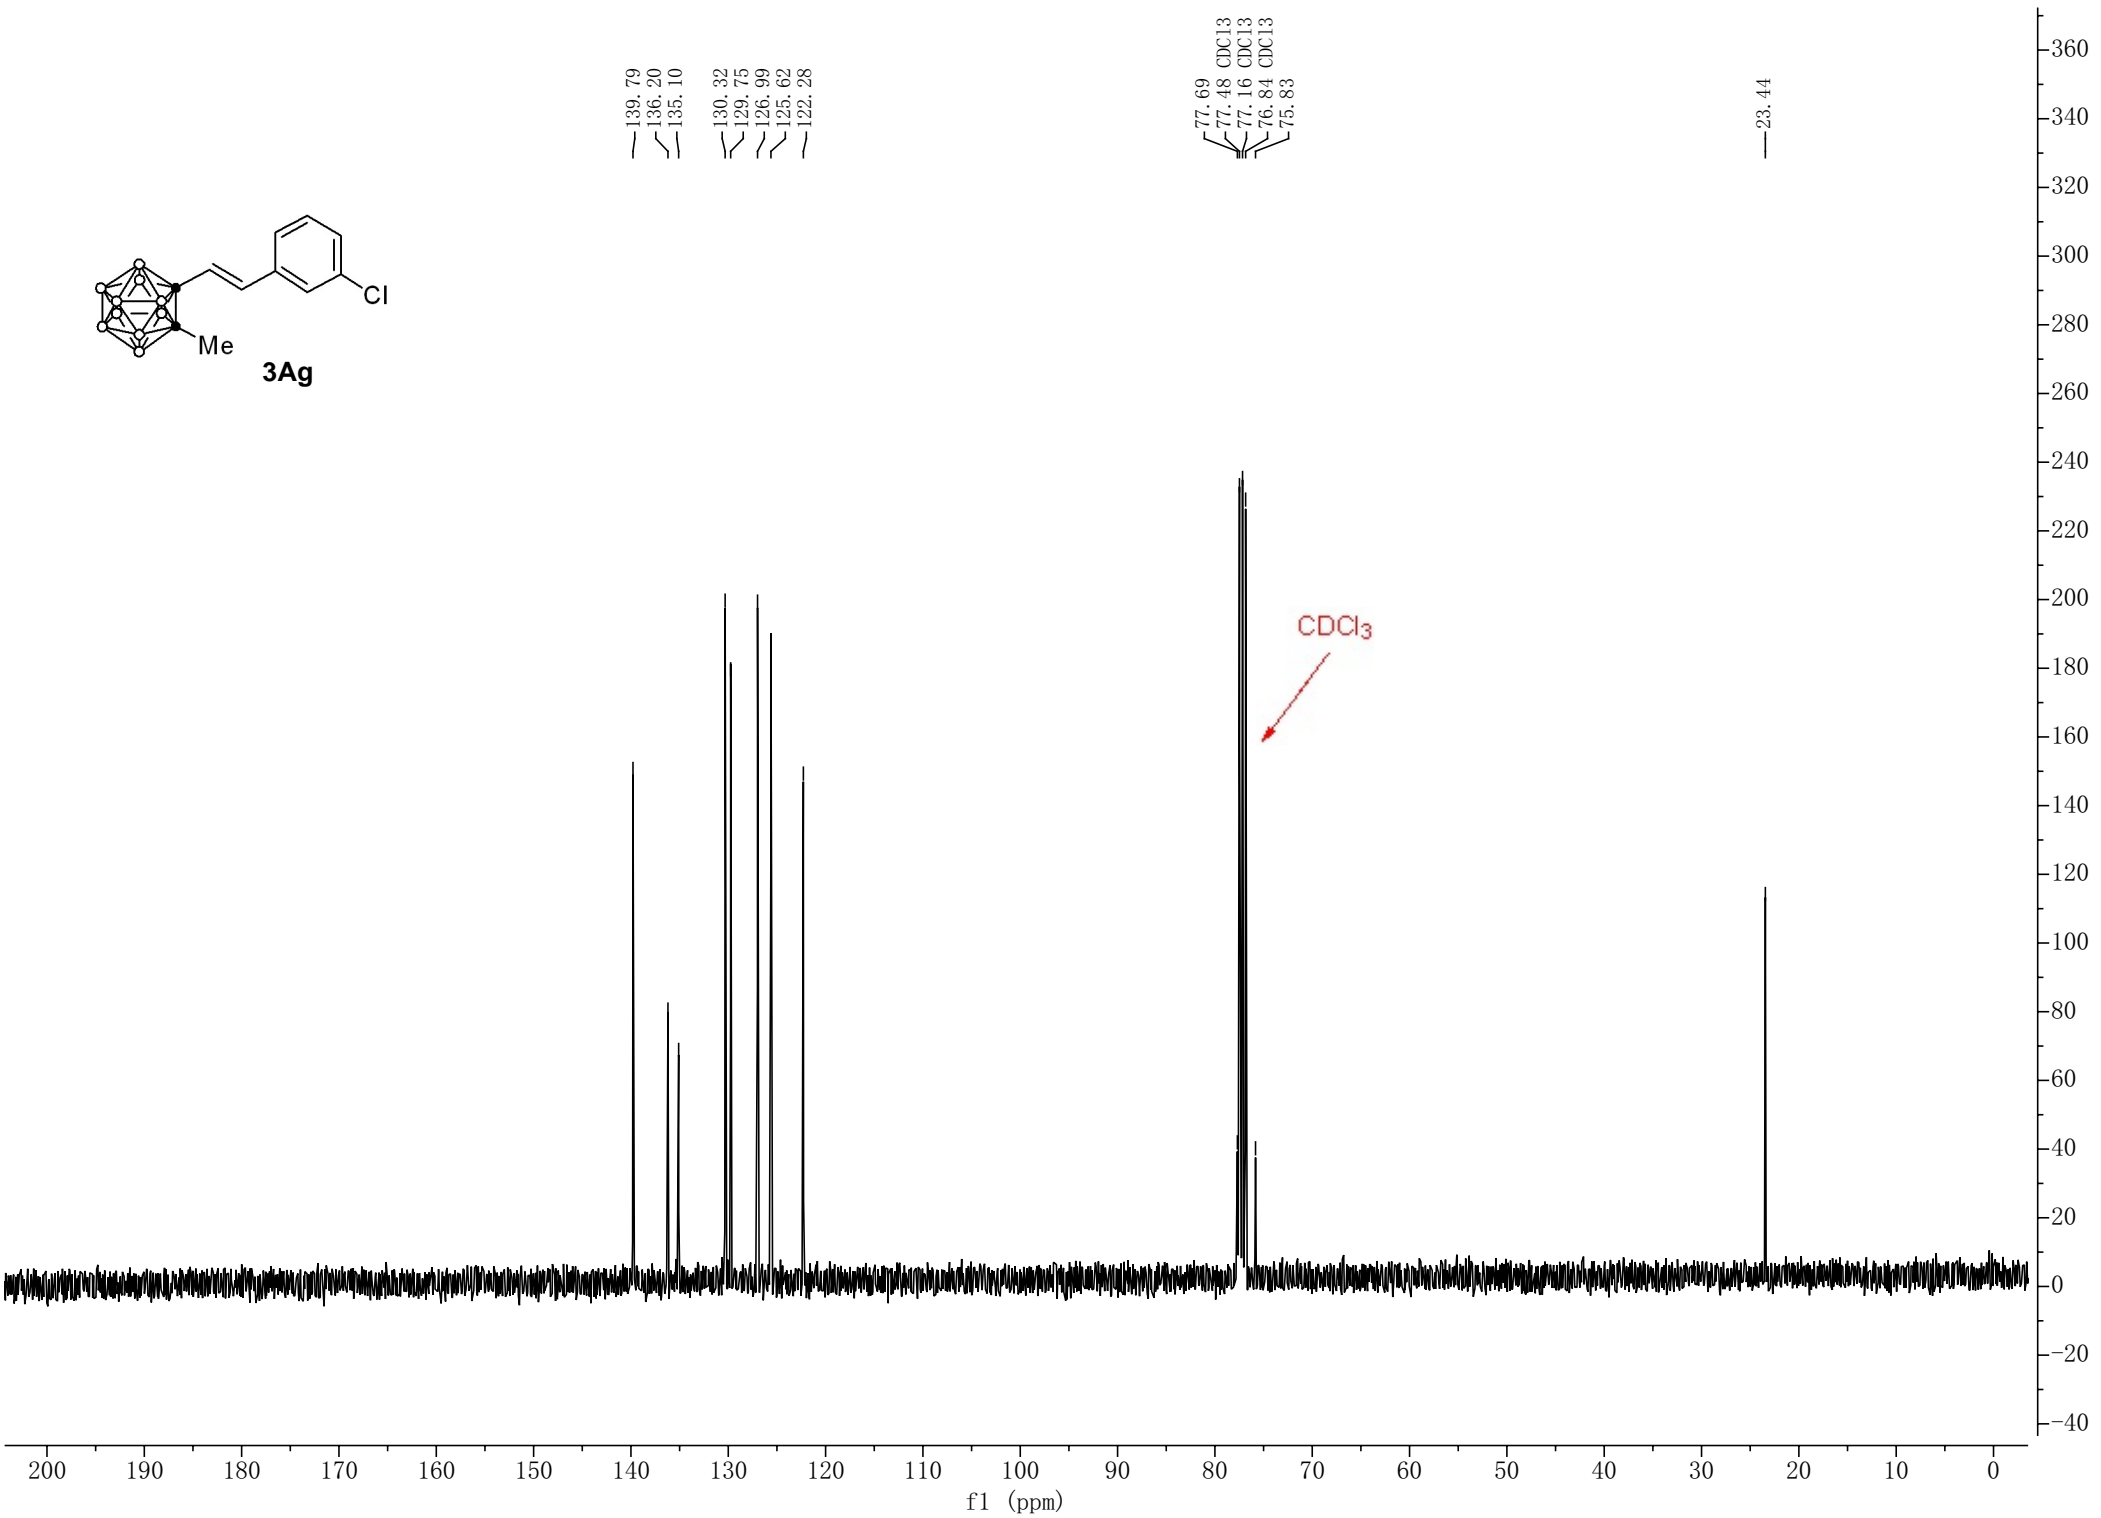

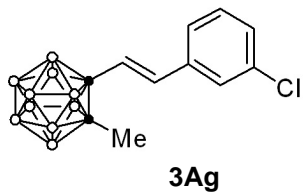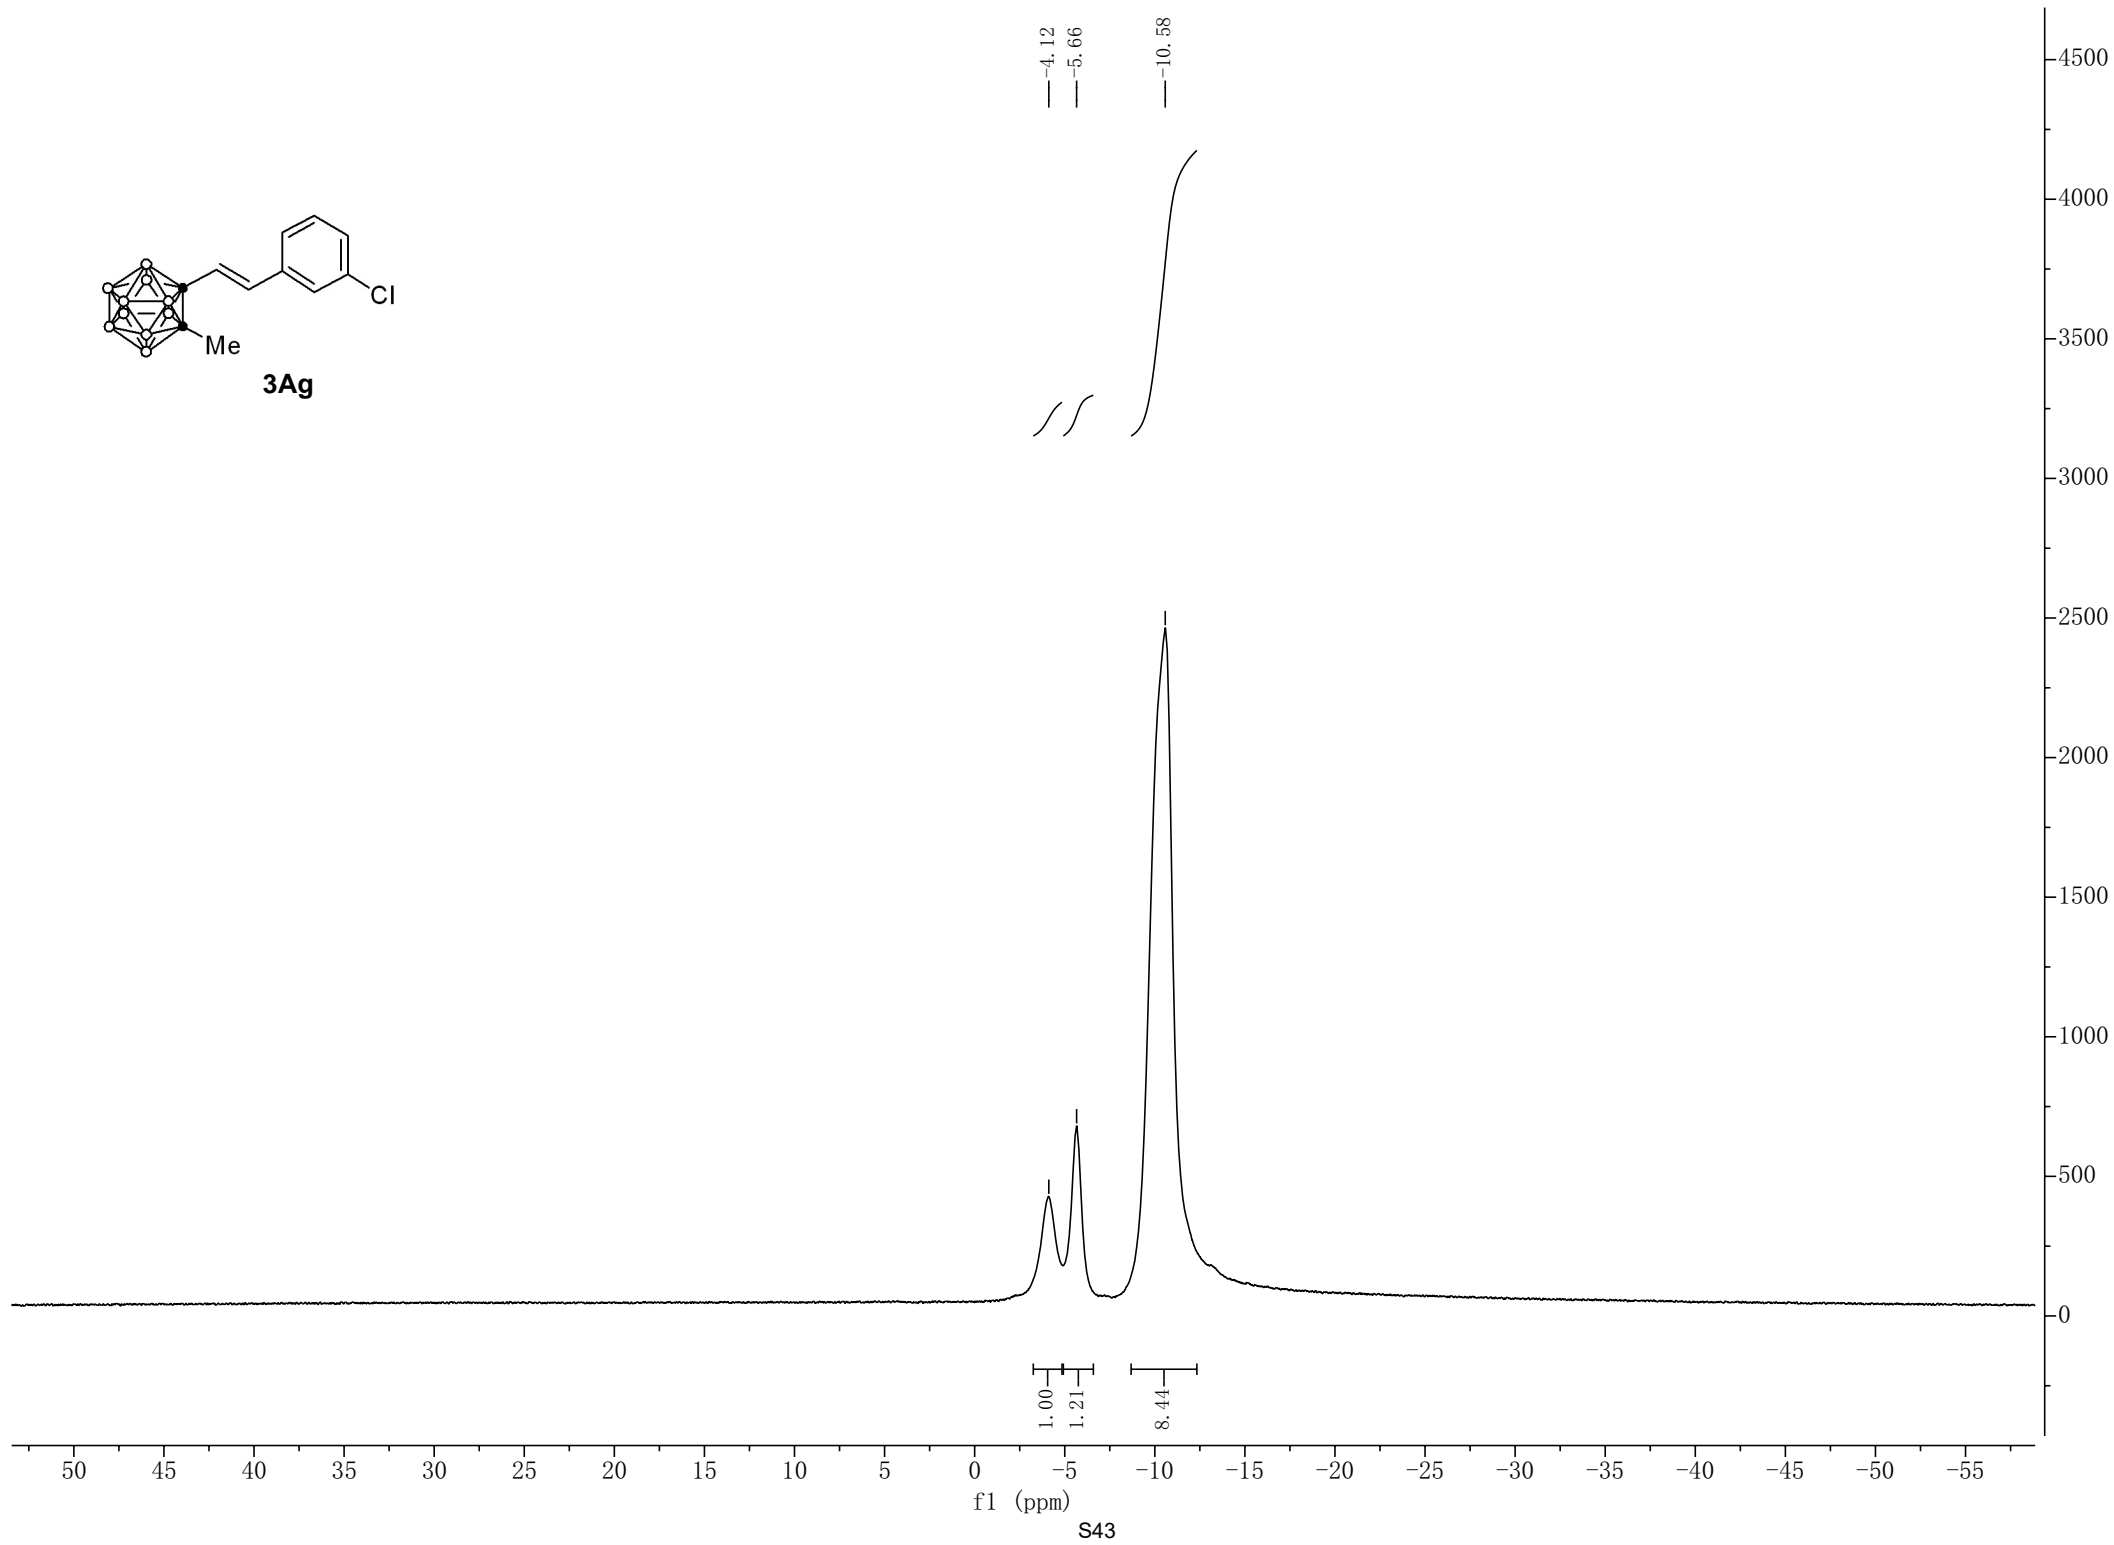

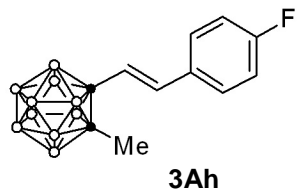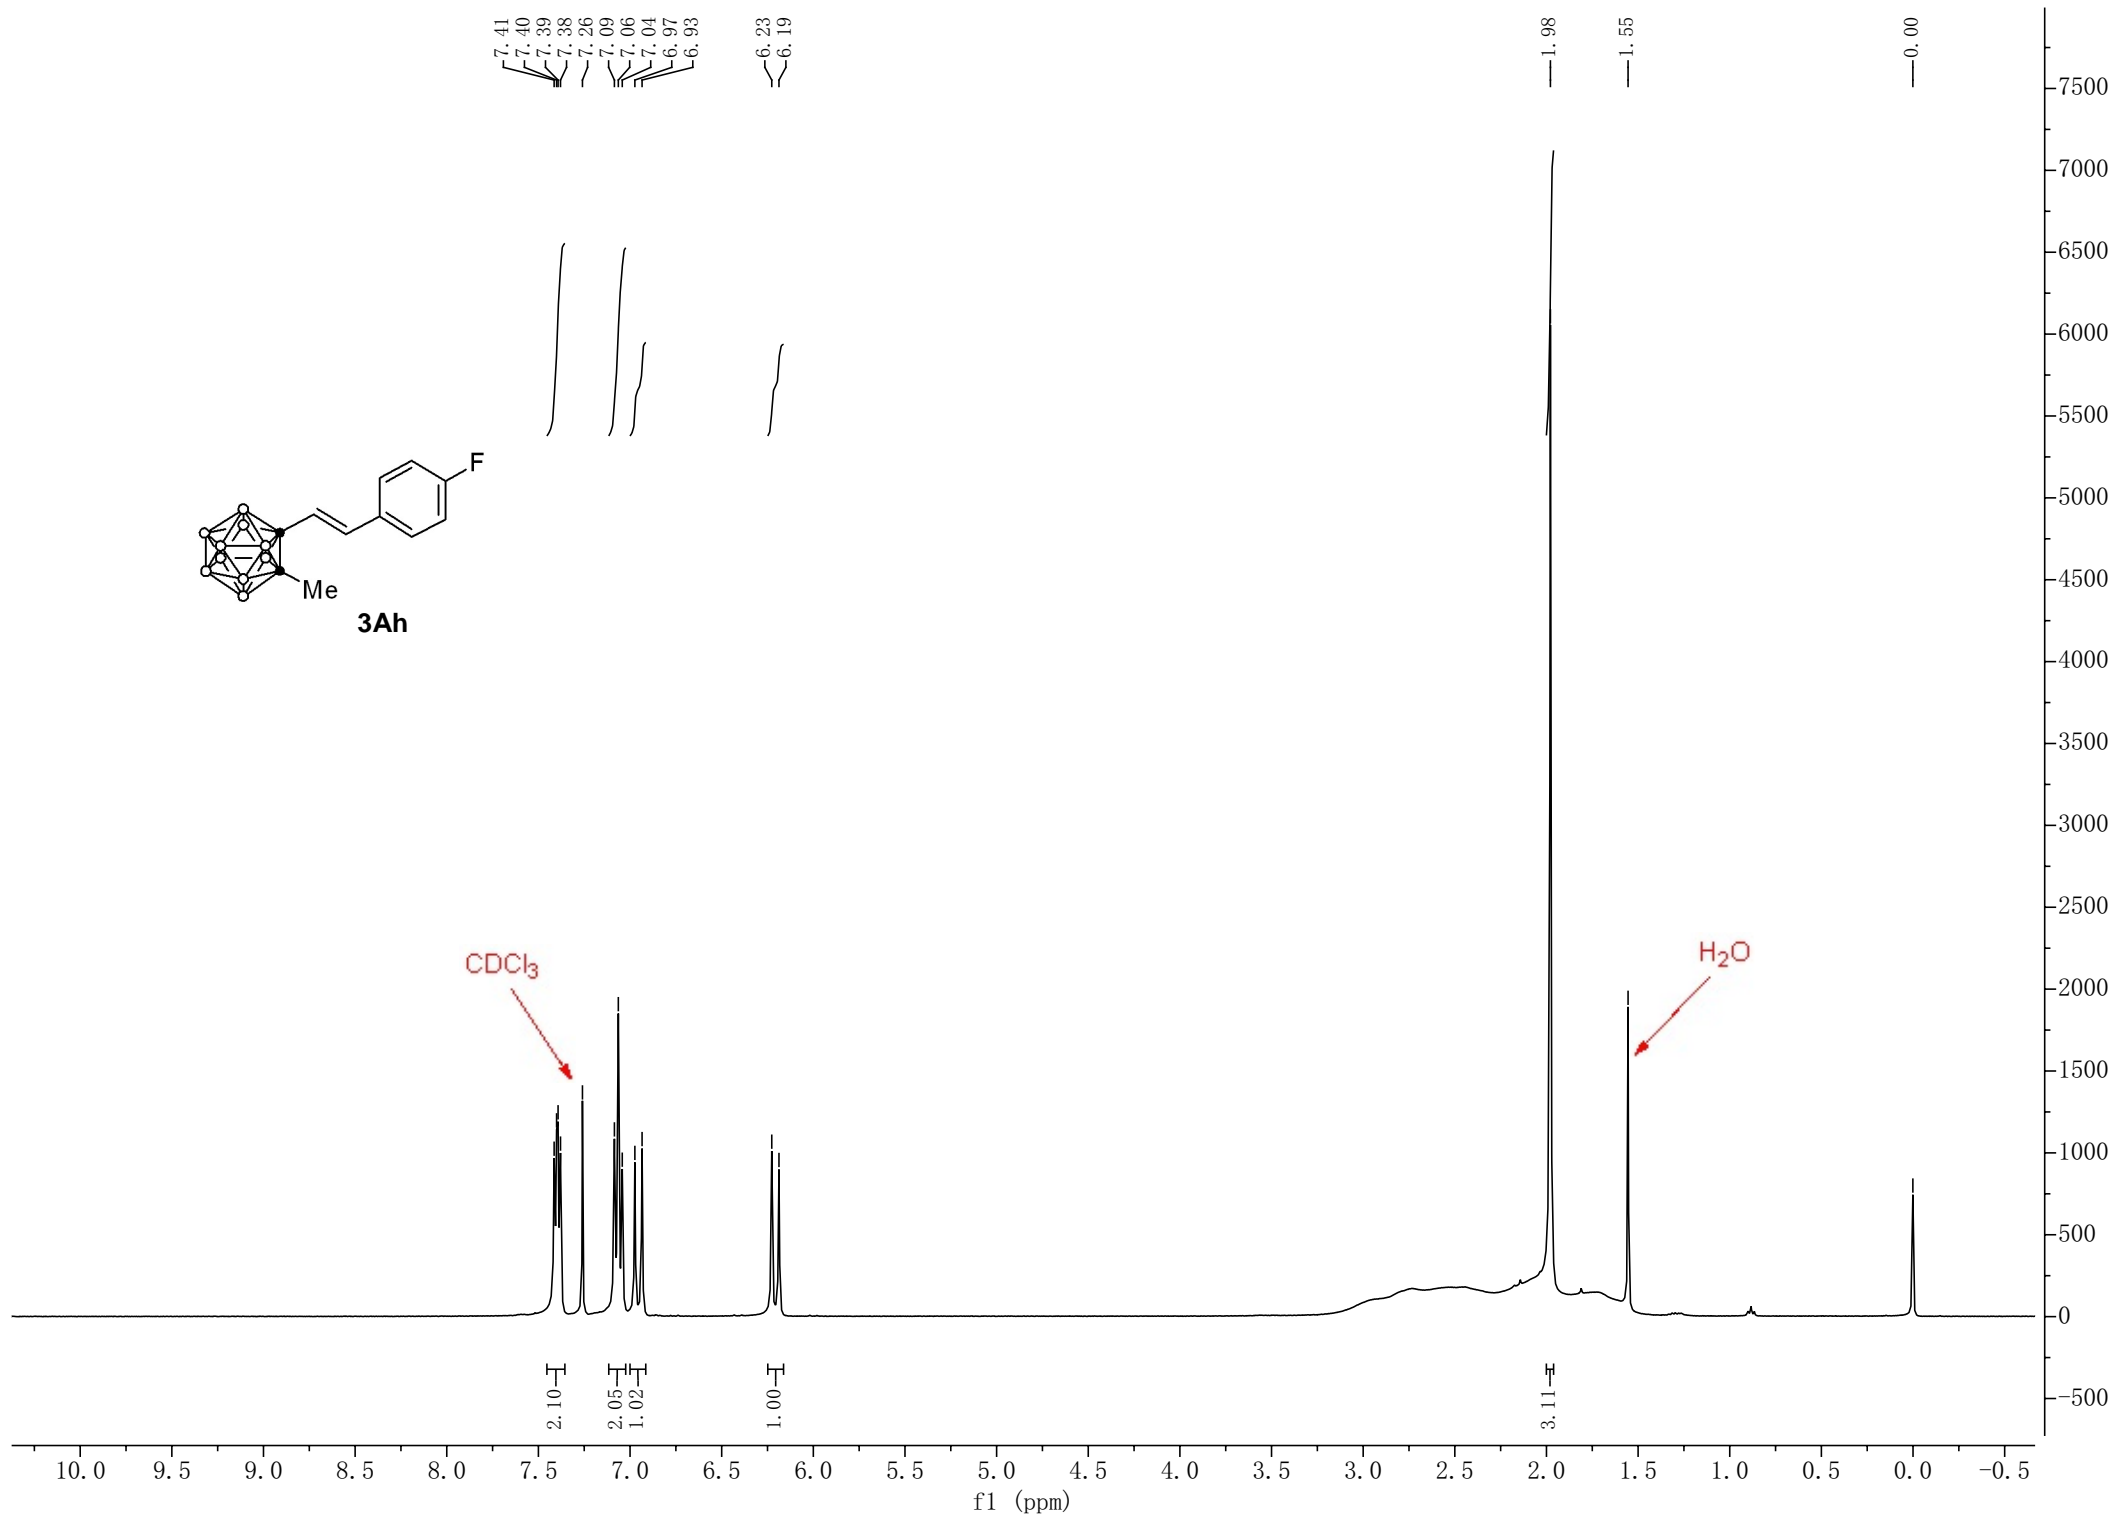

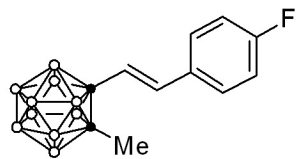

3Ah

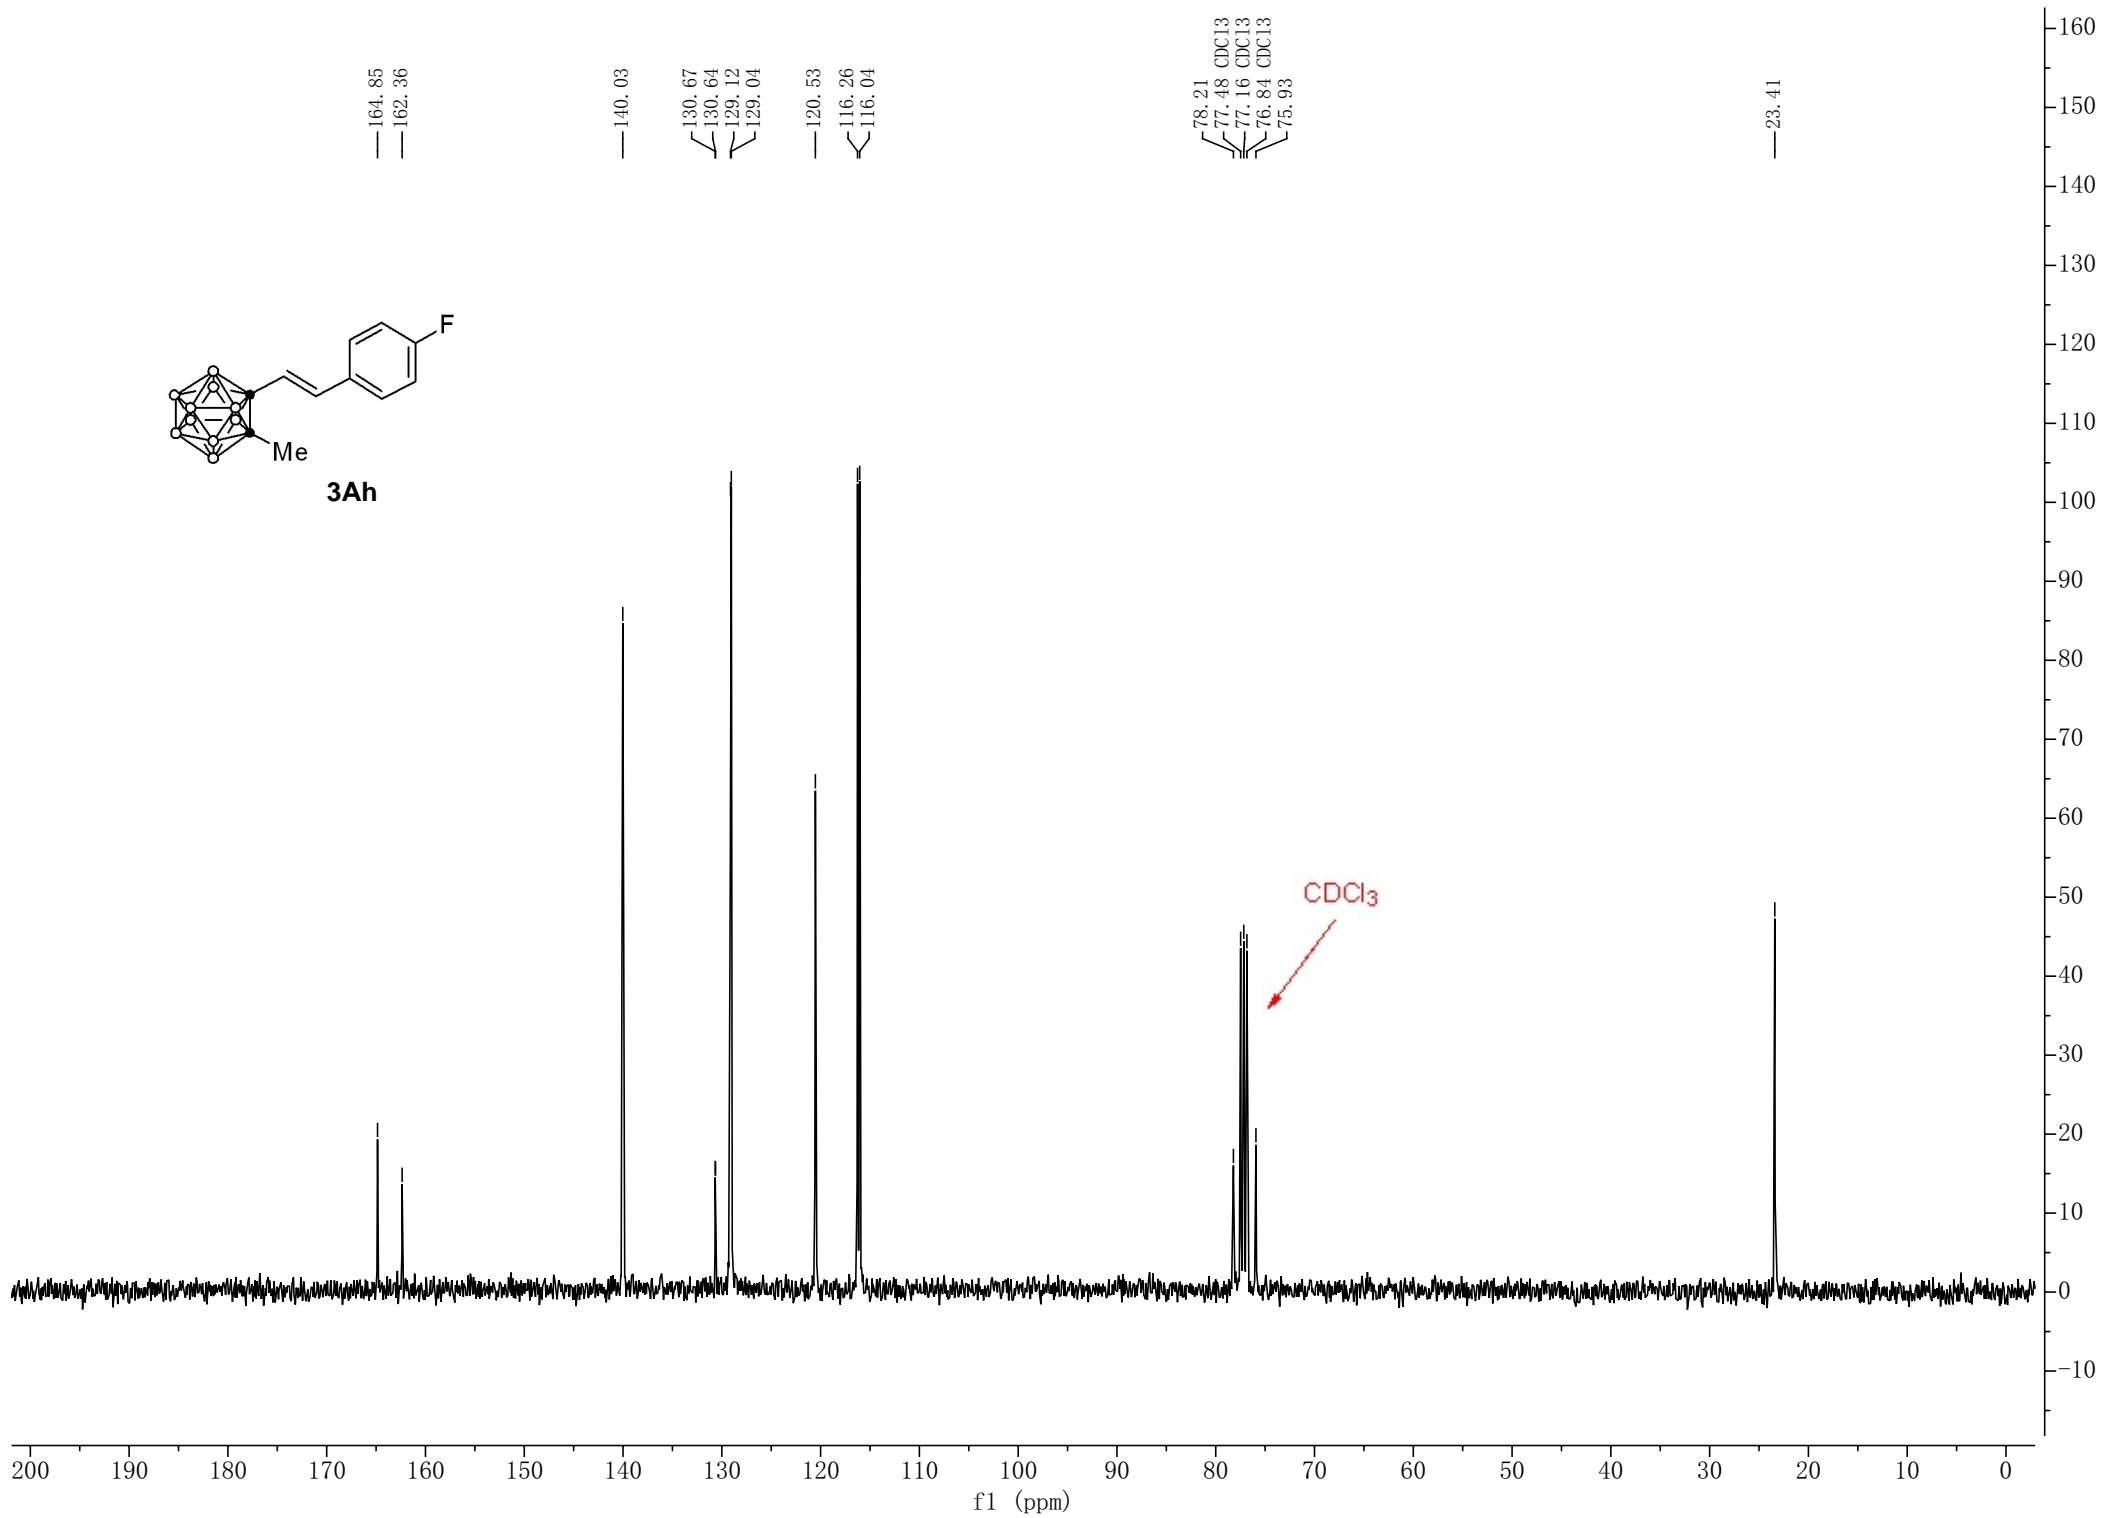

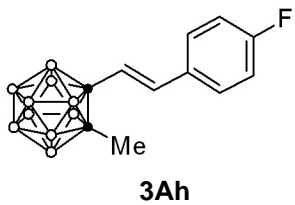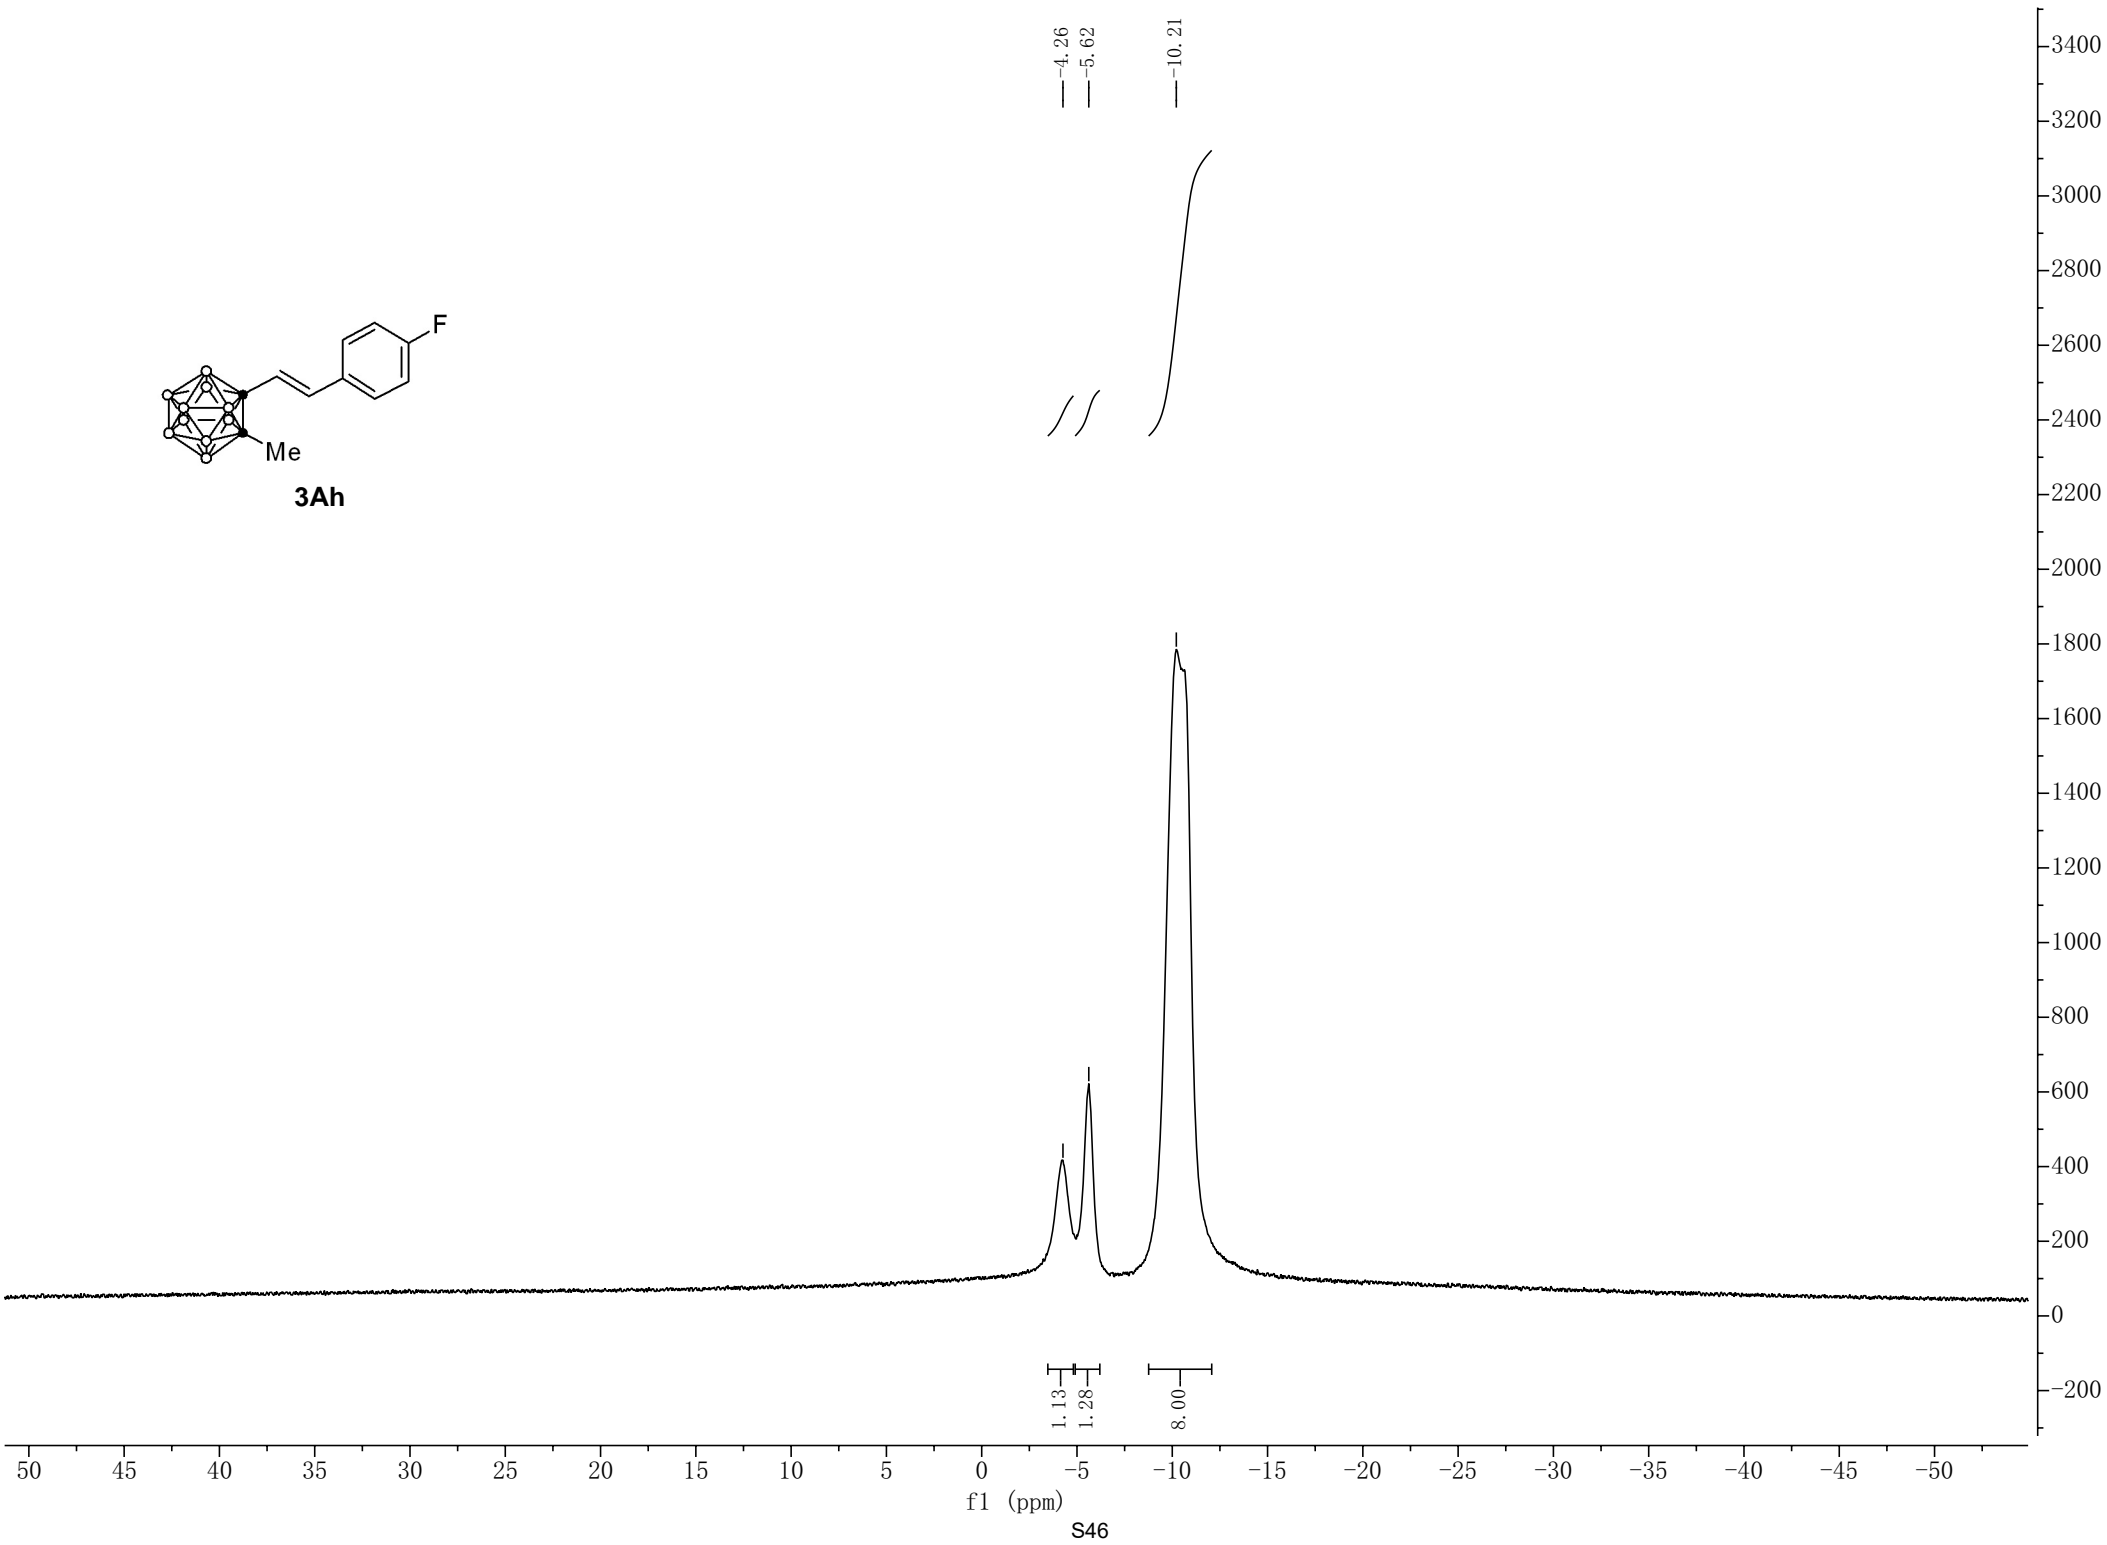

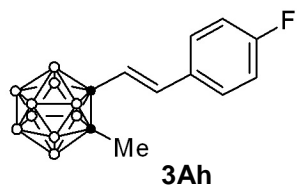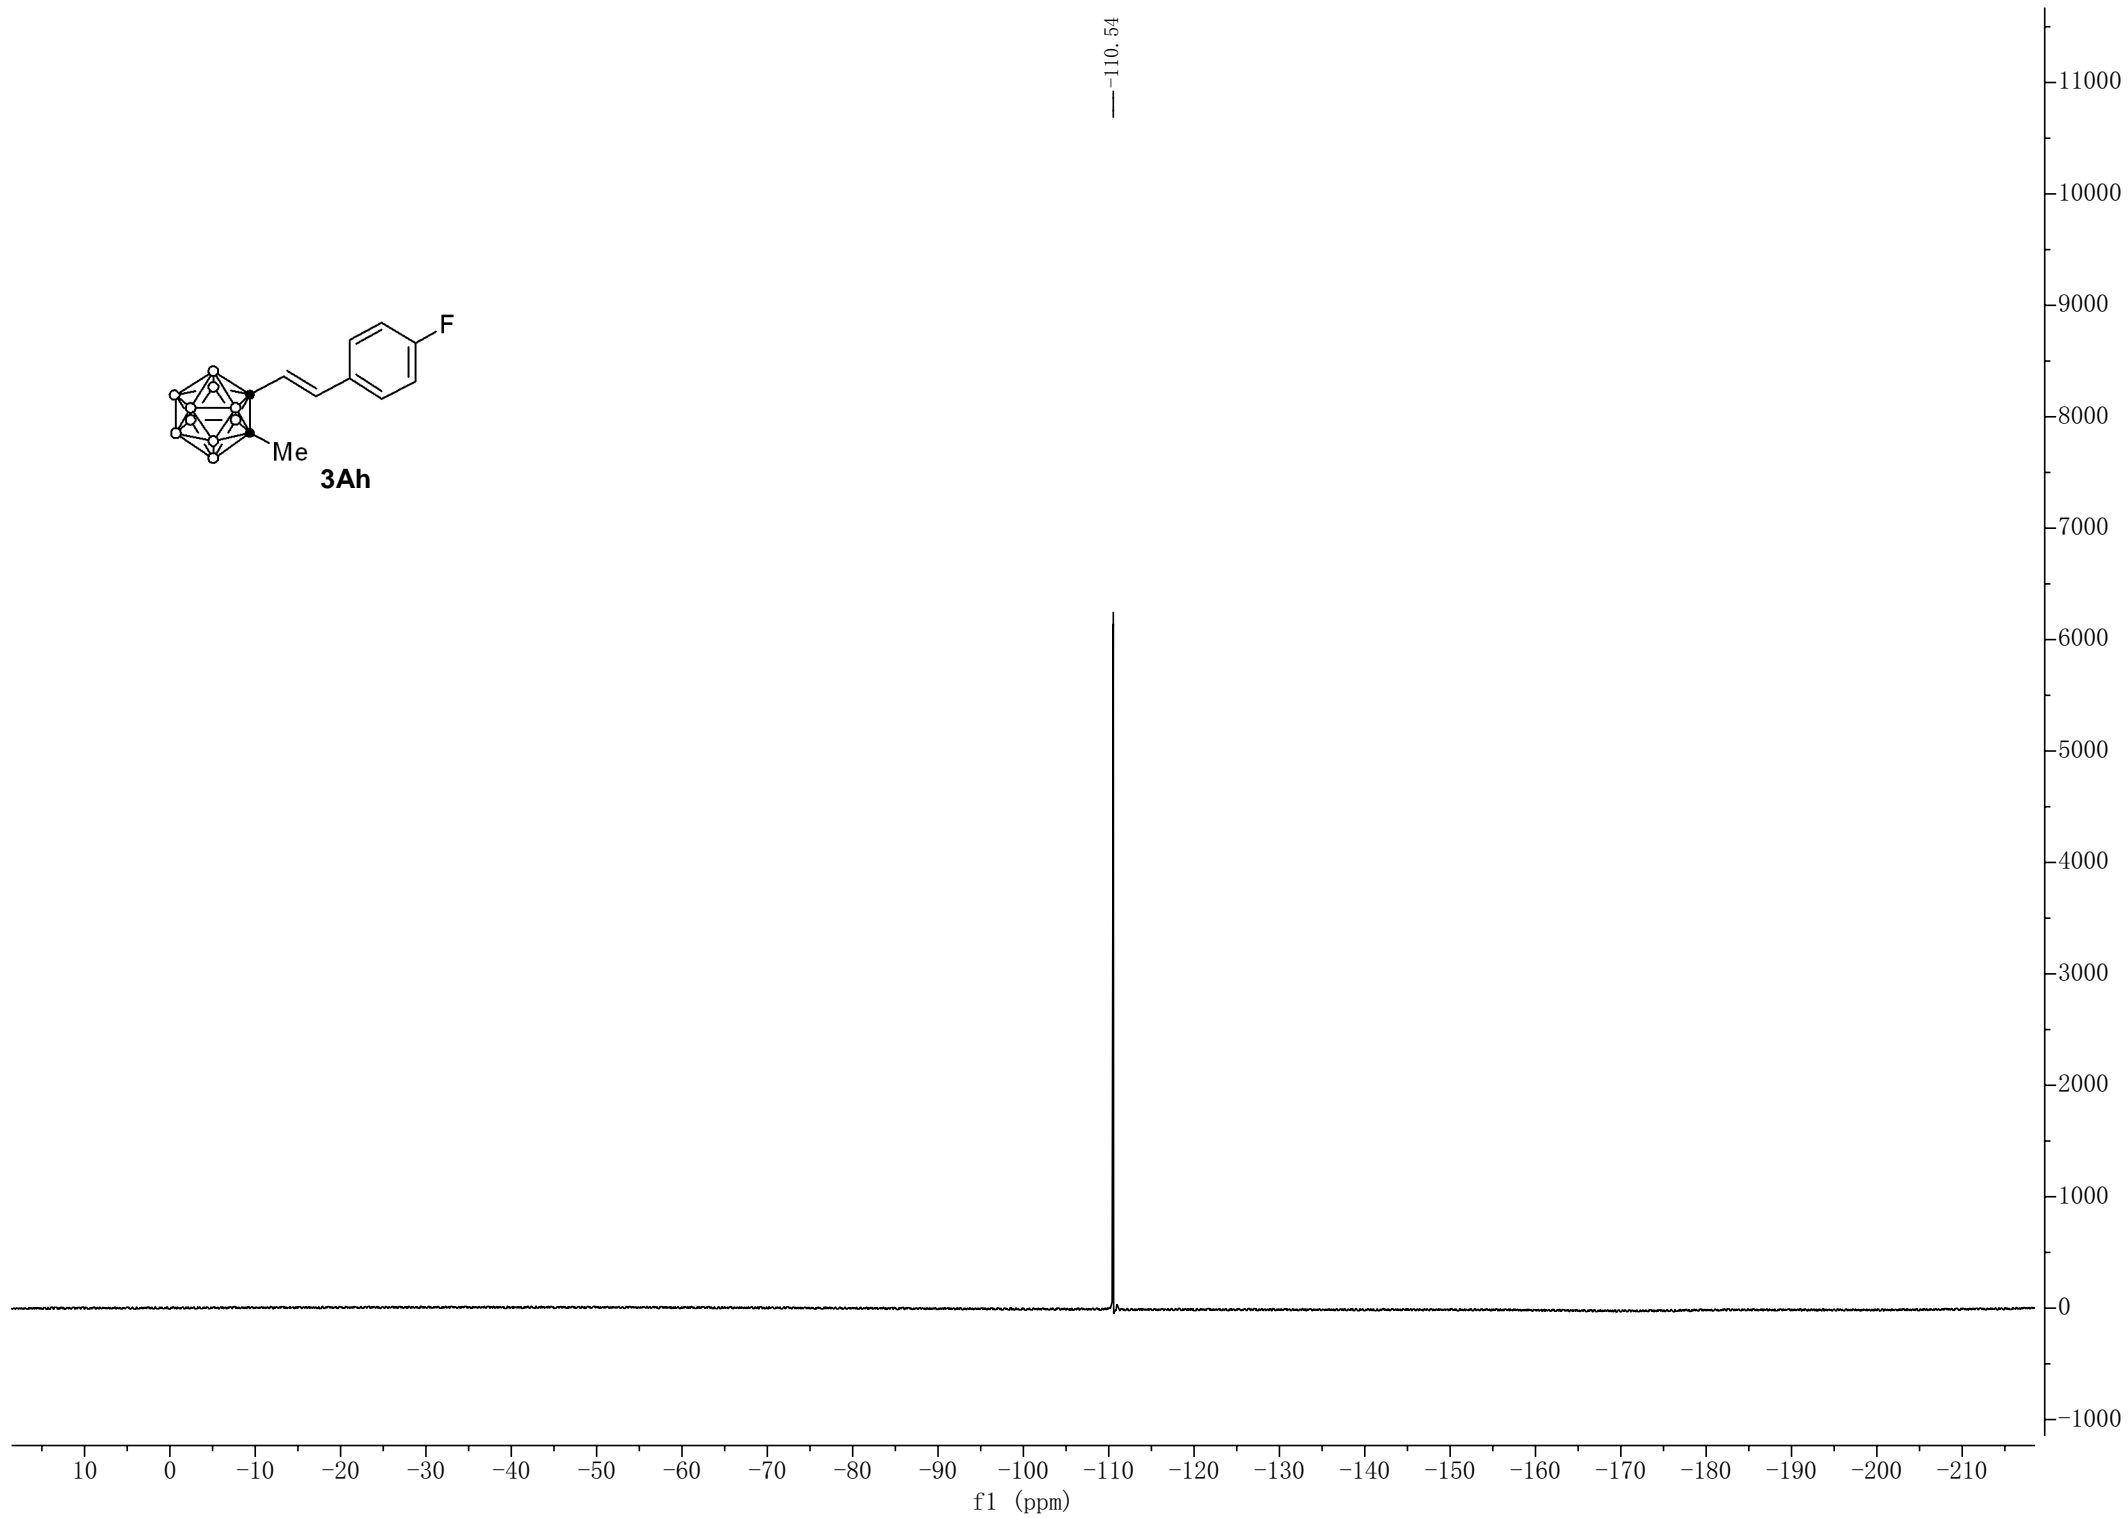

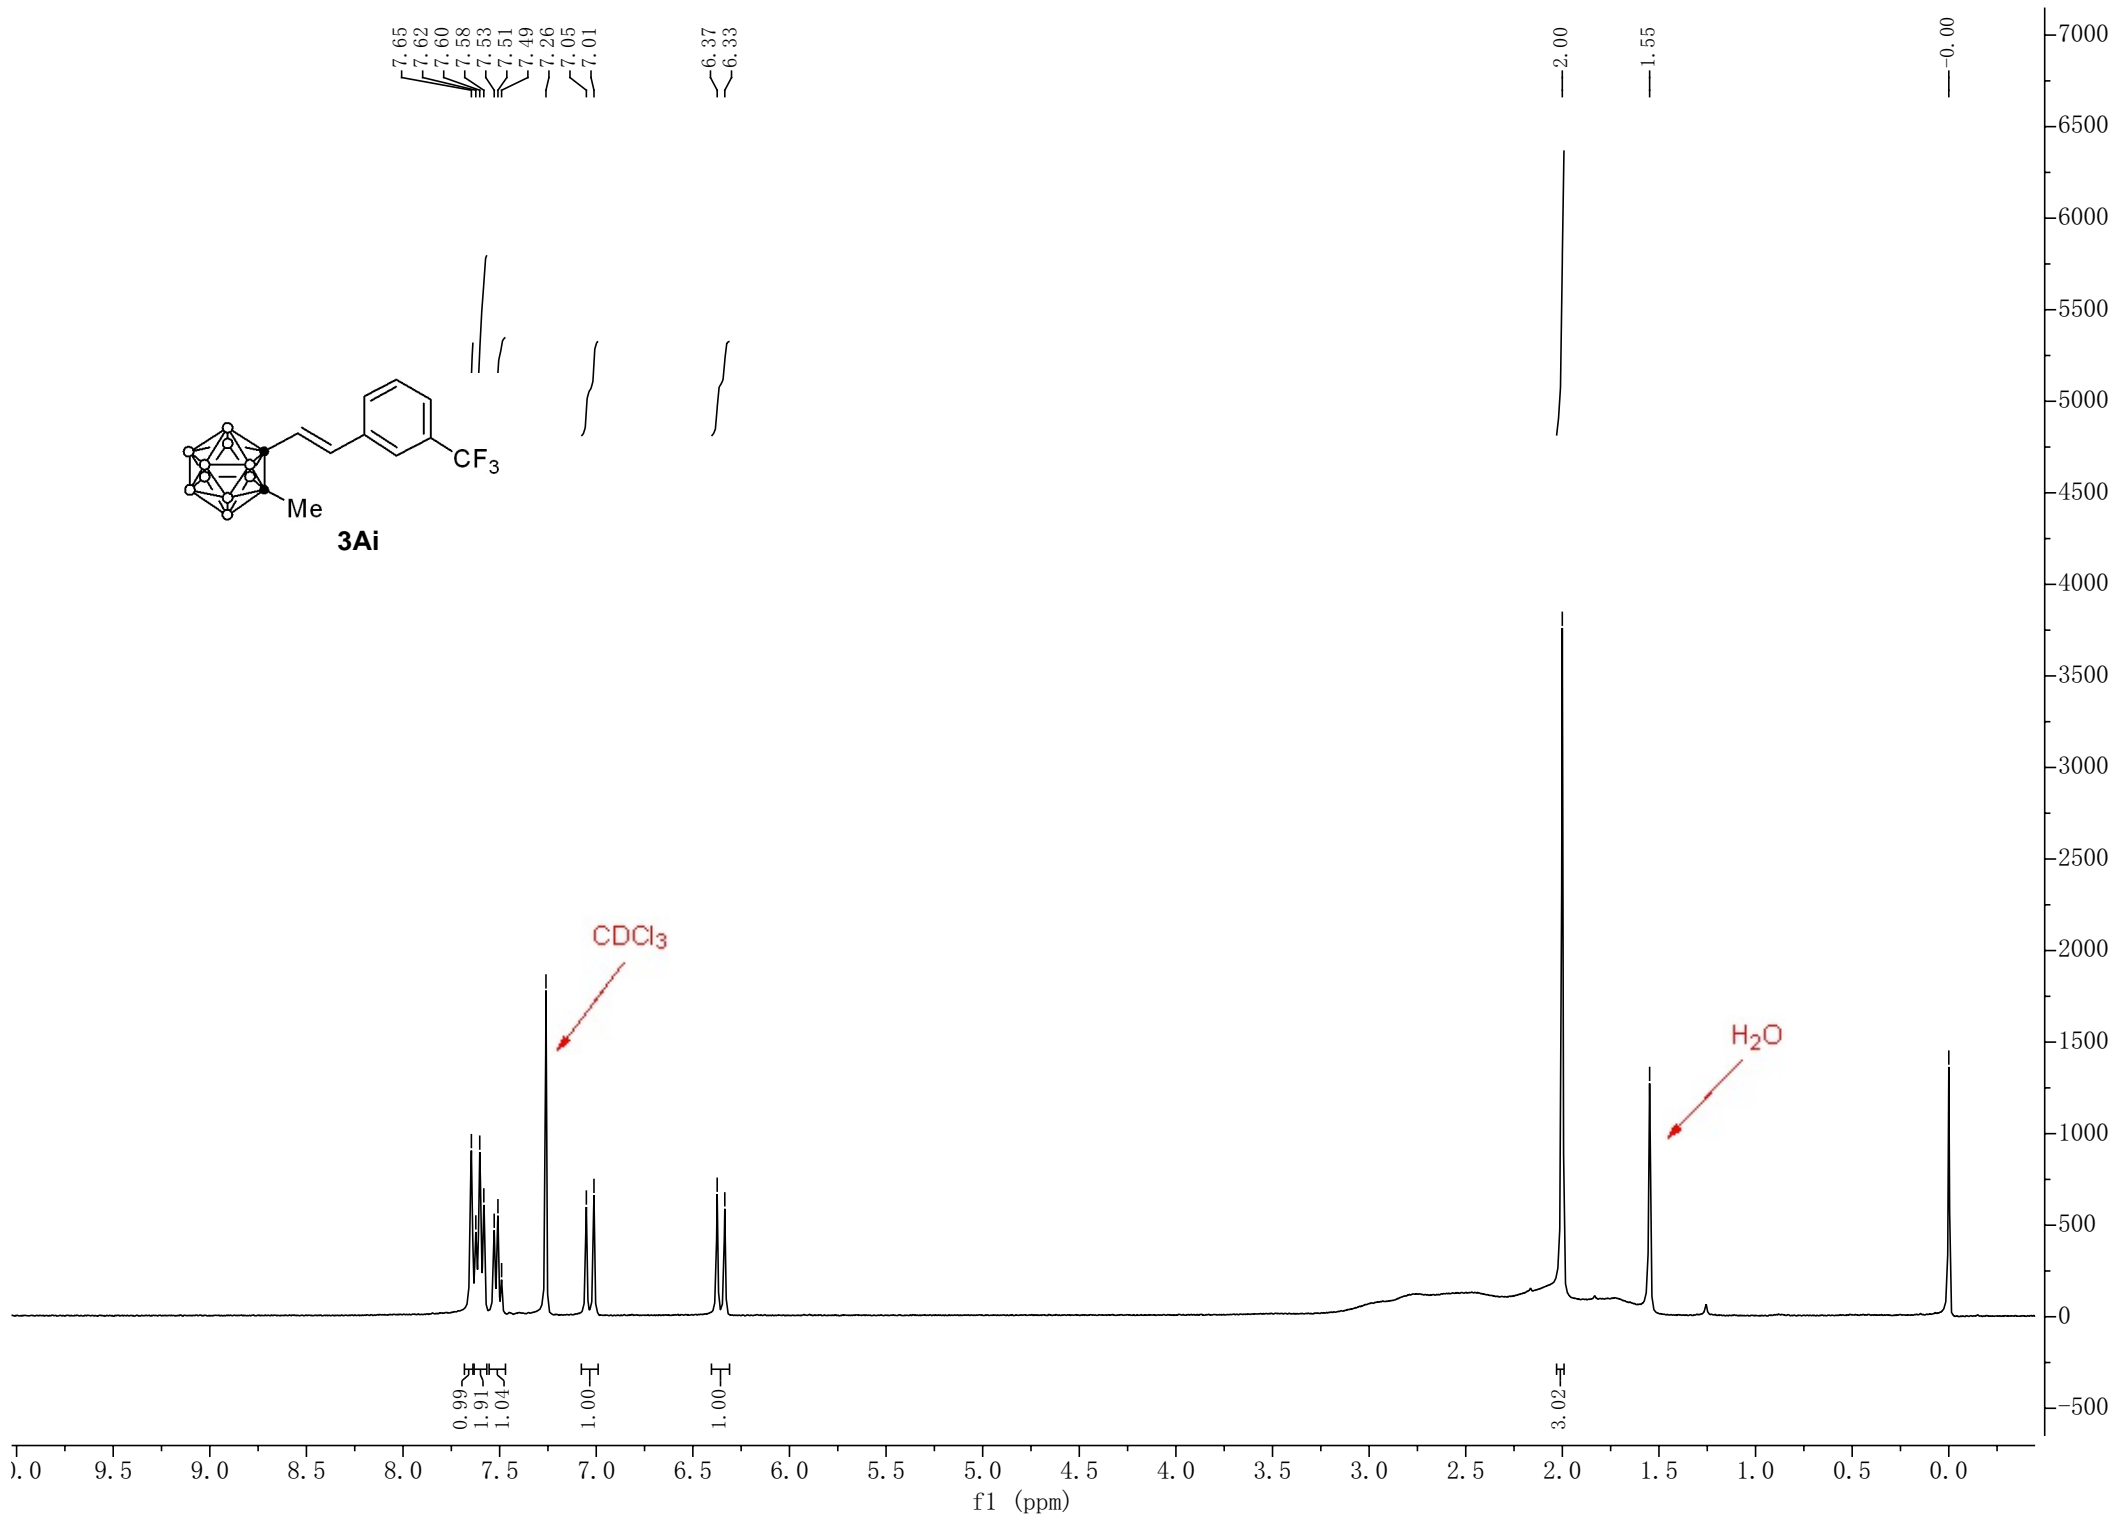



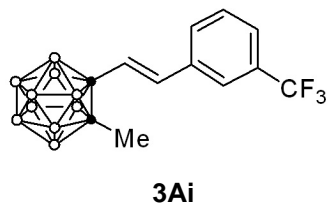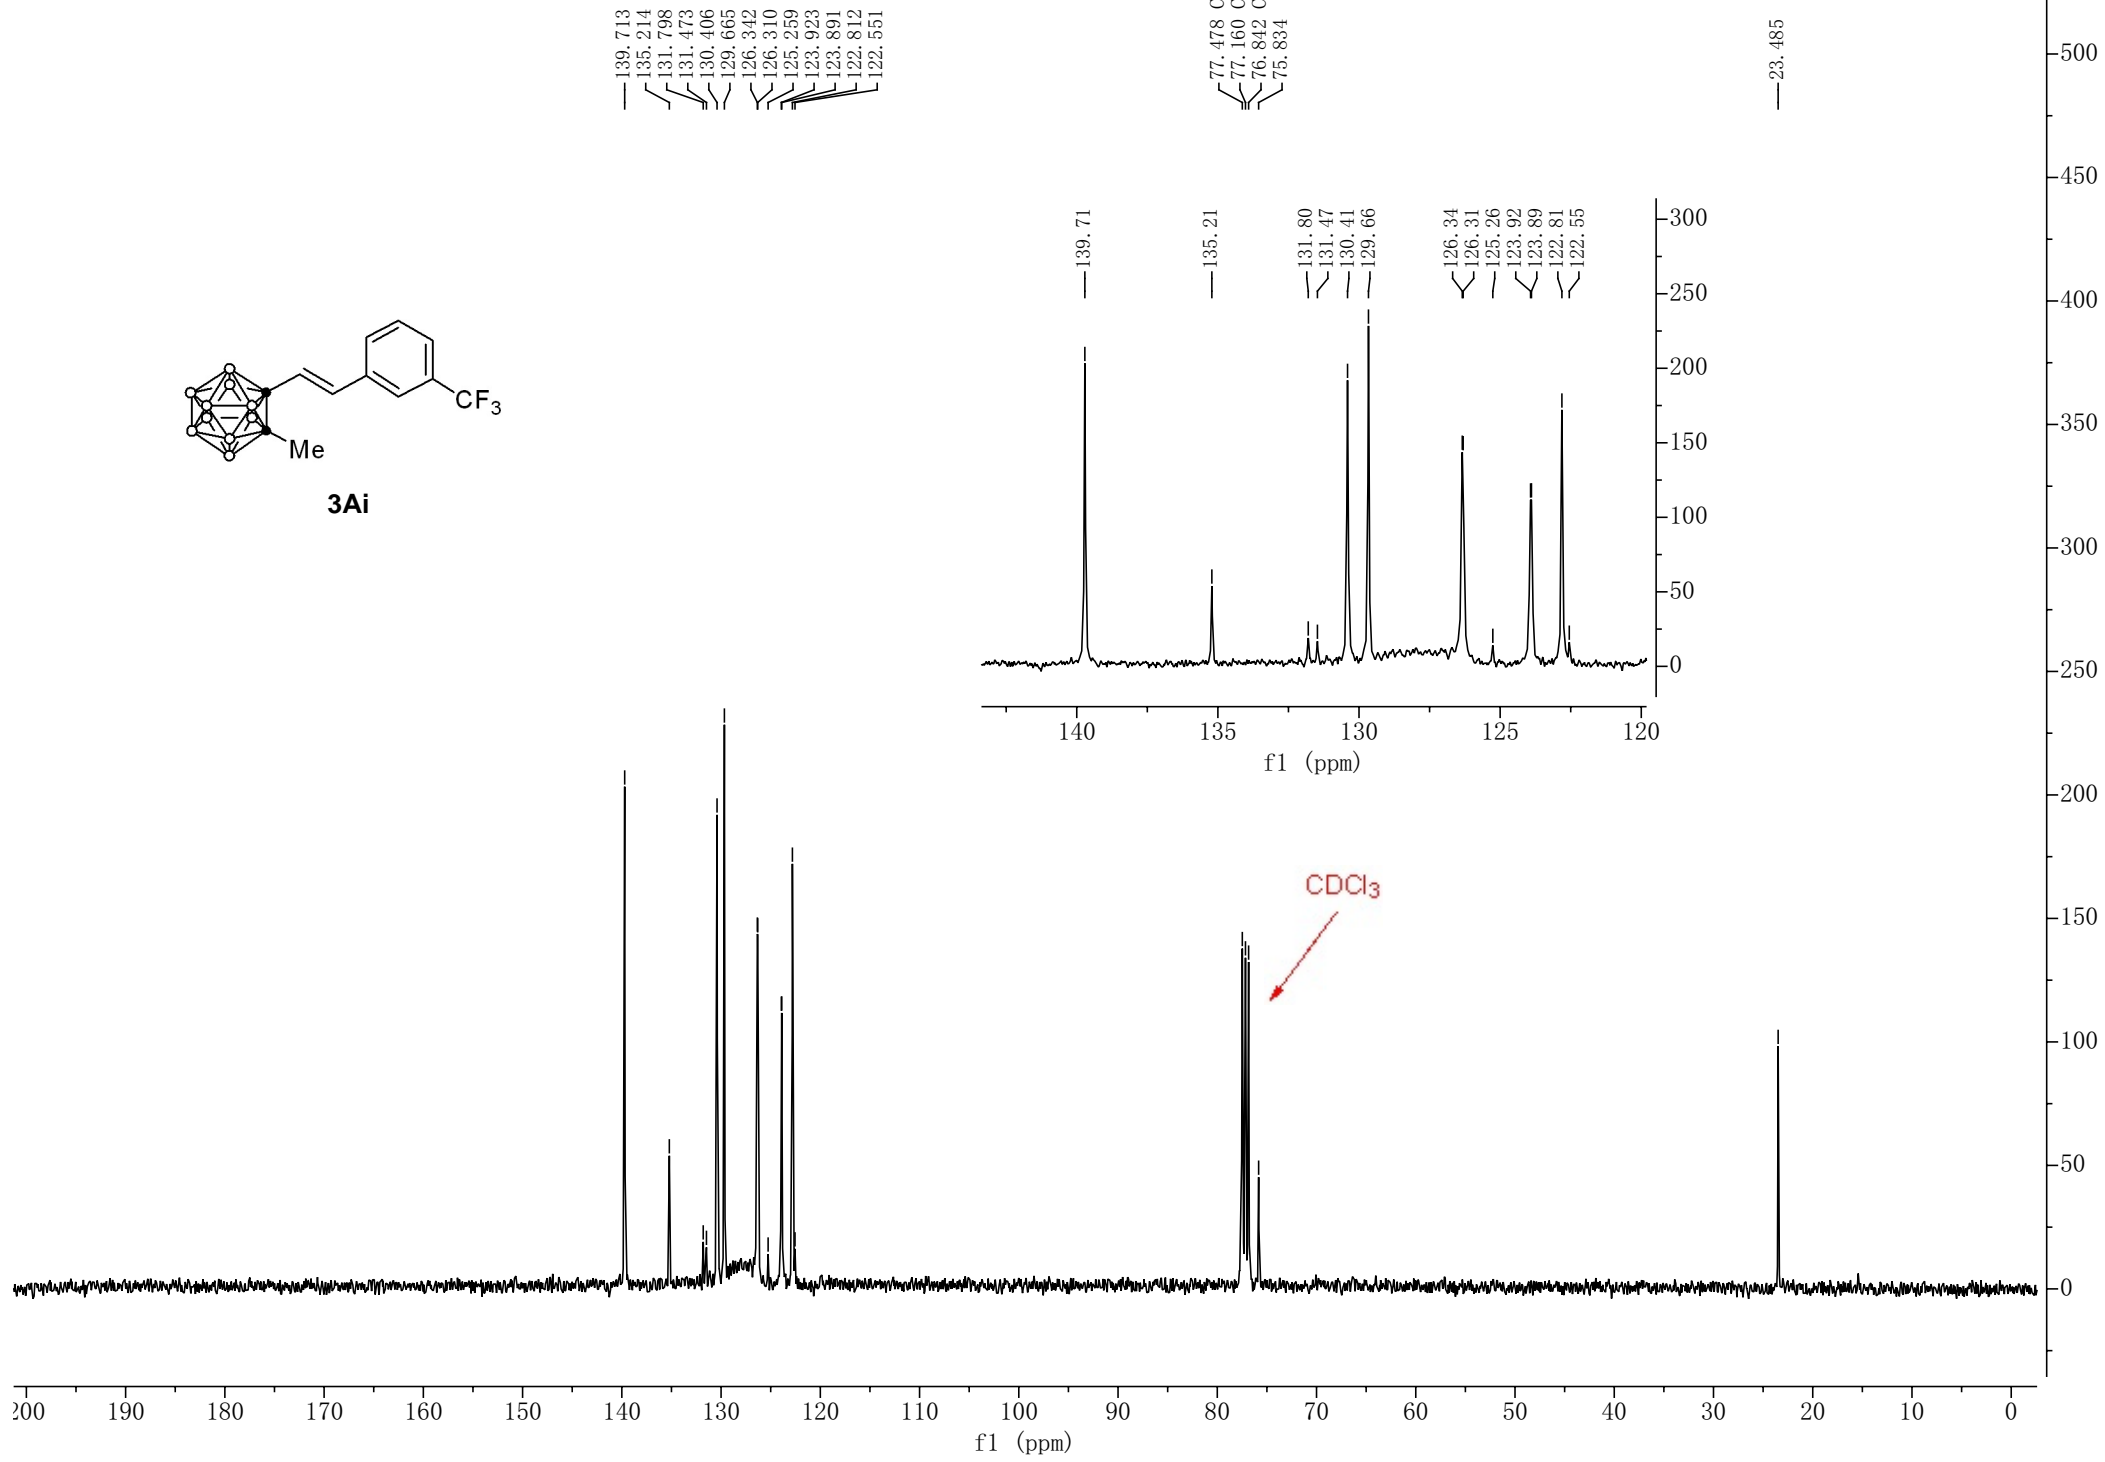

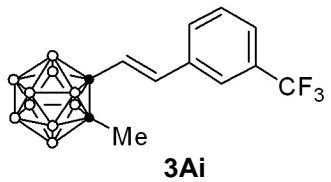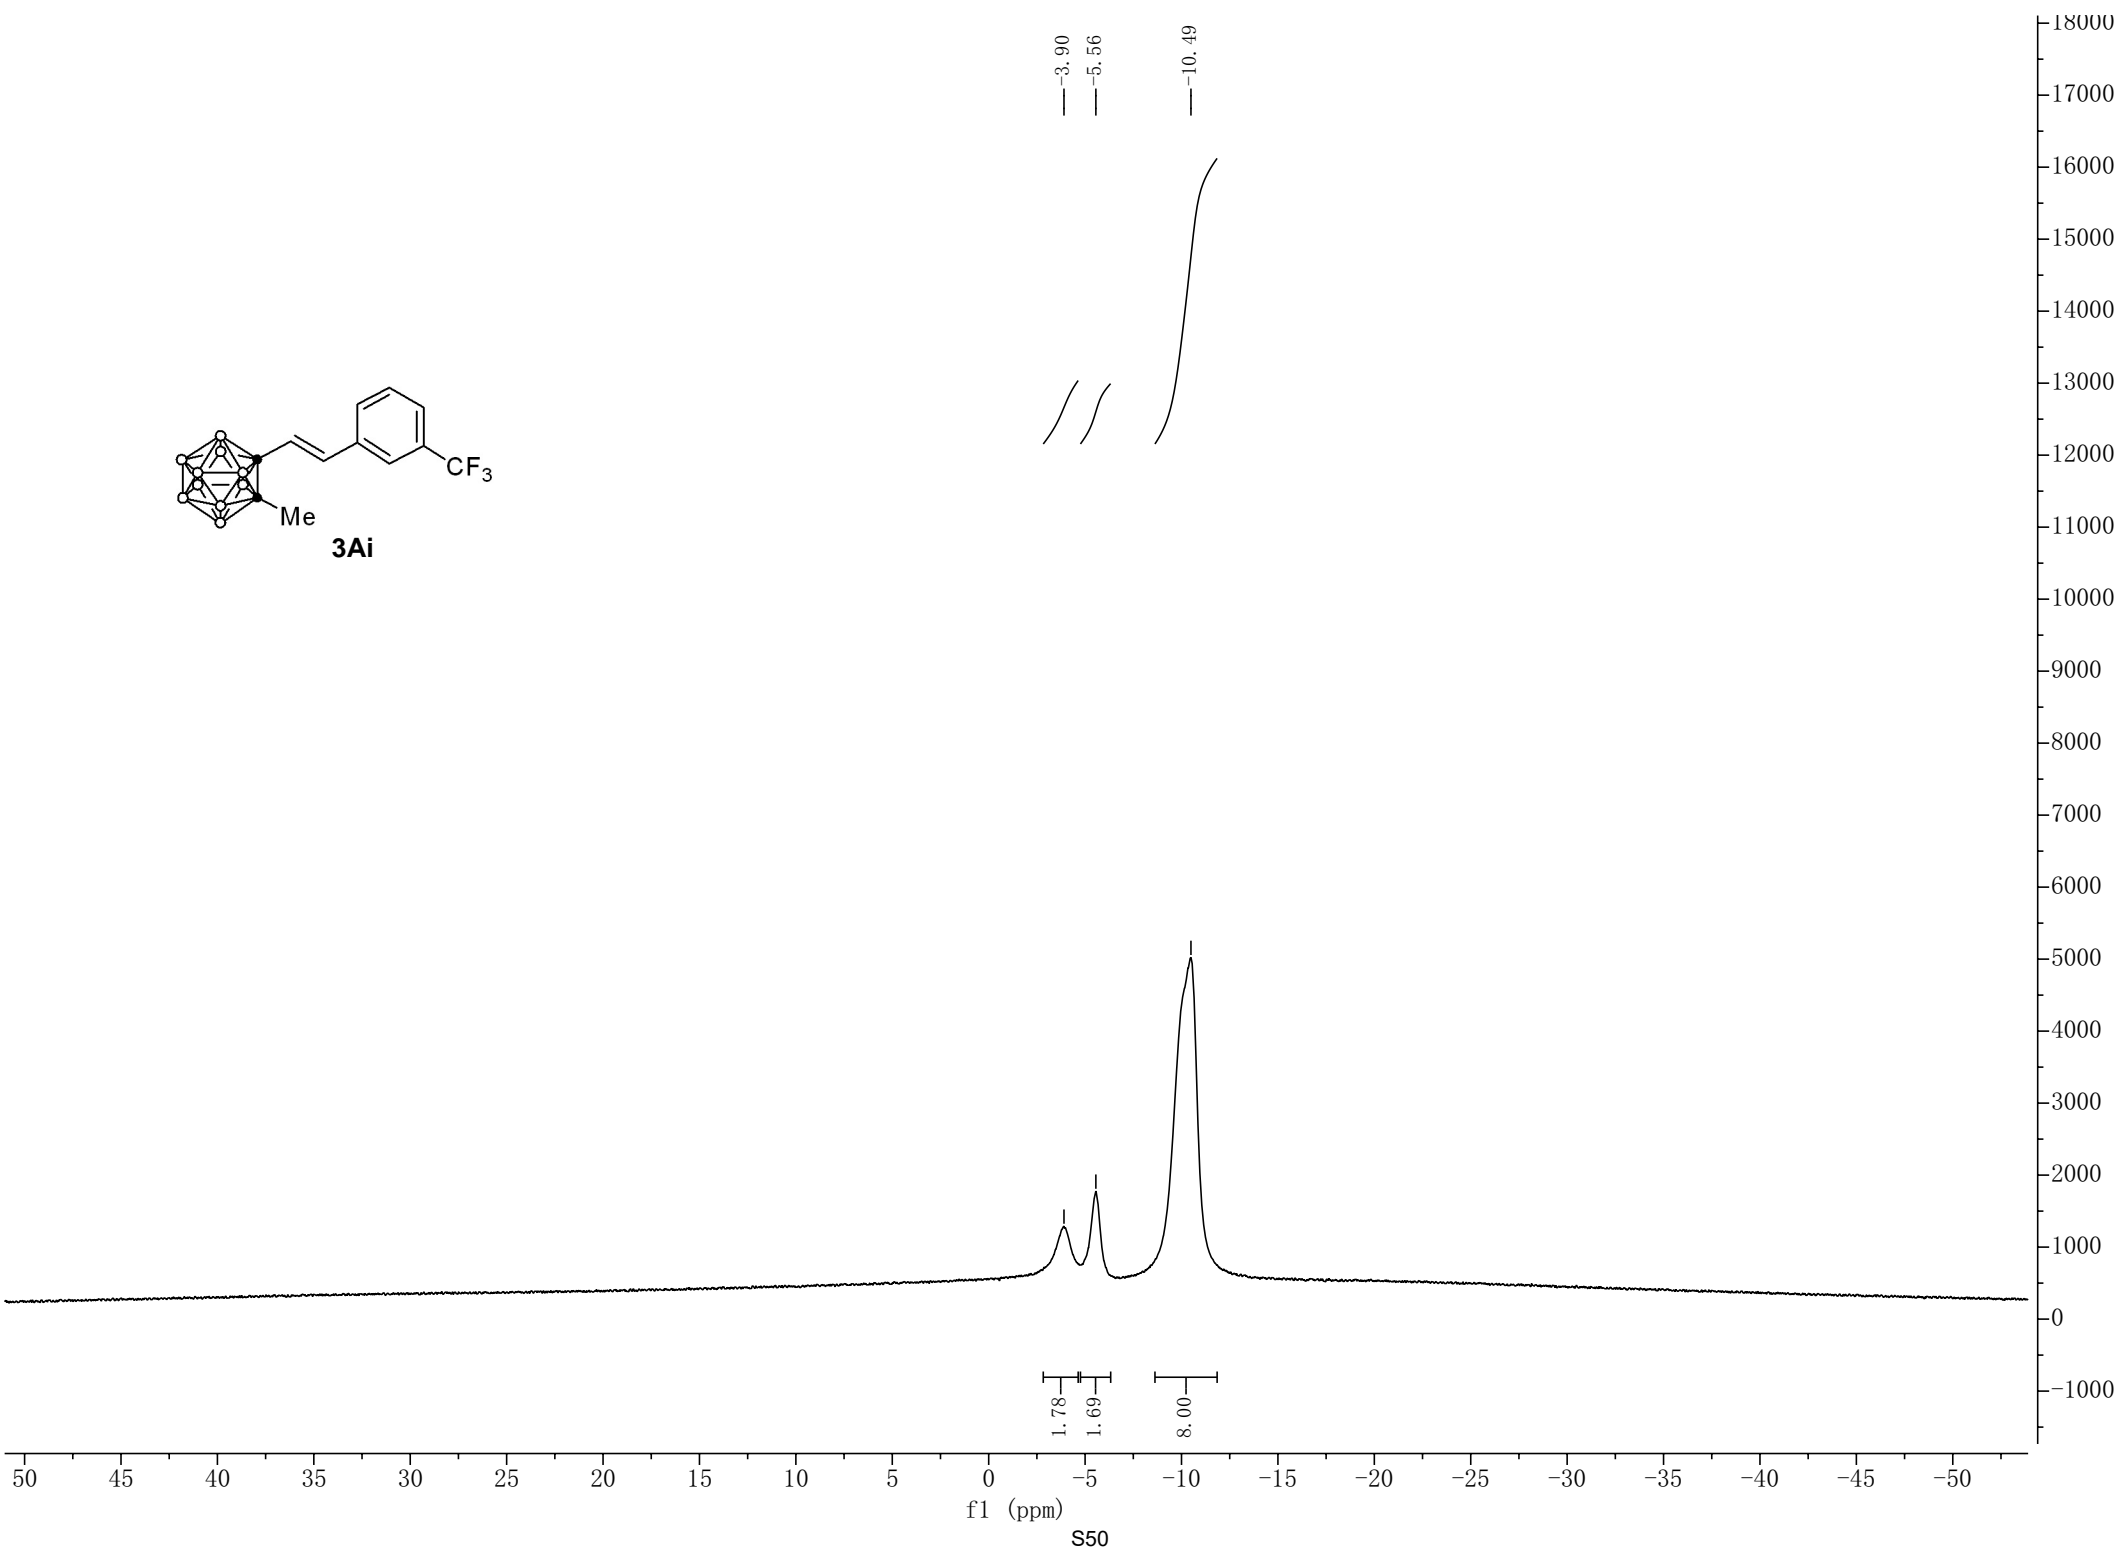

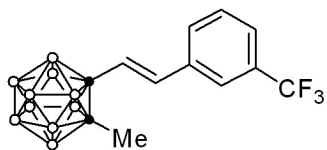

**3Ai**

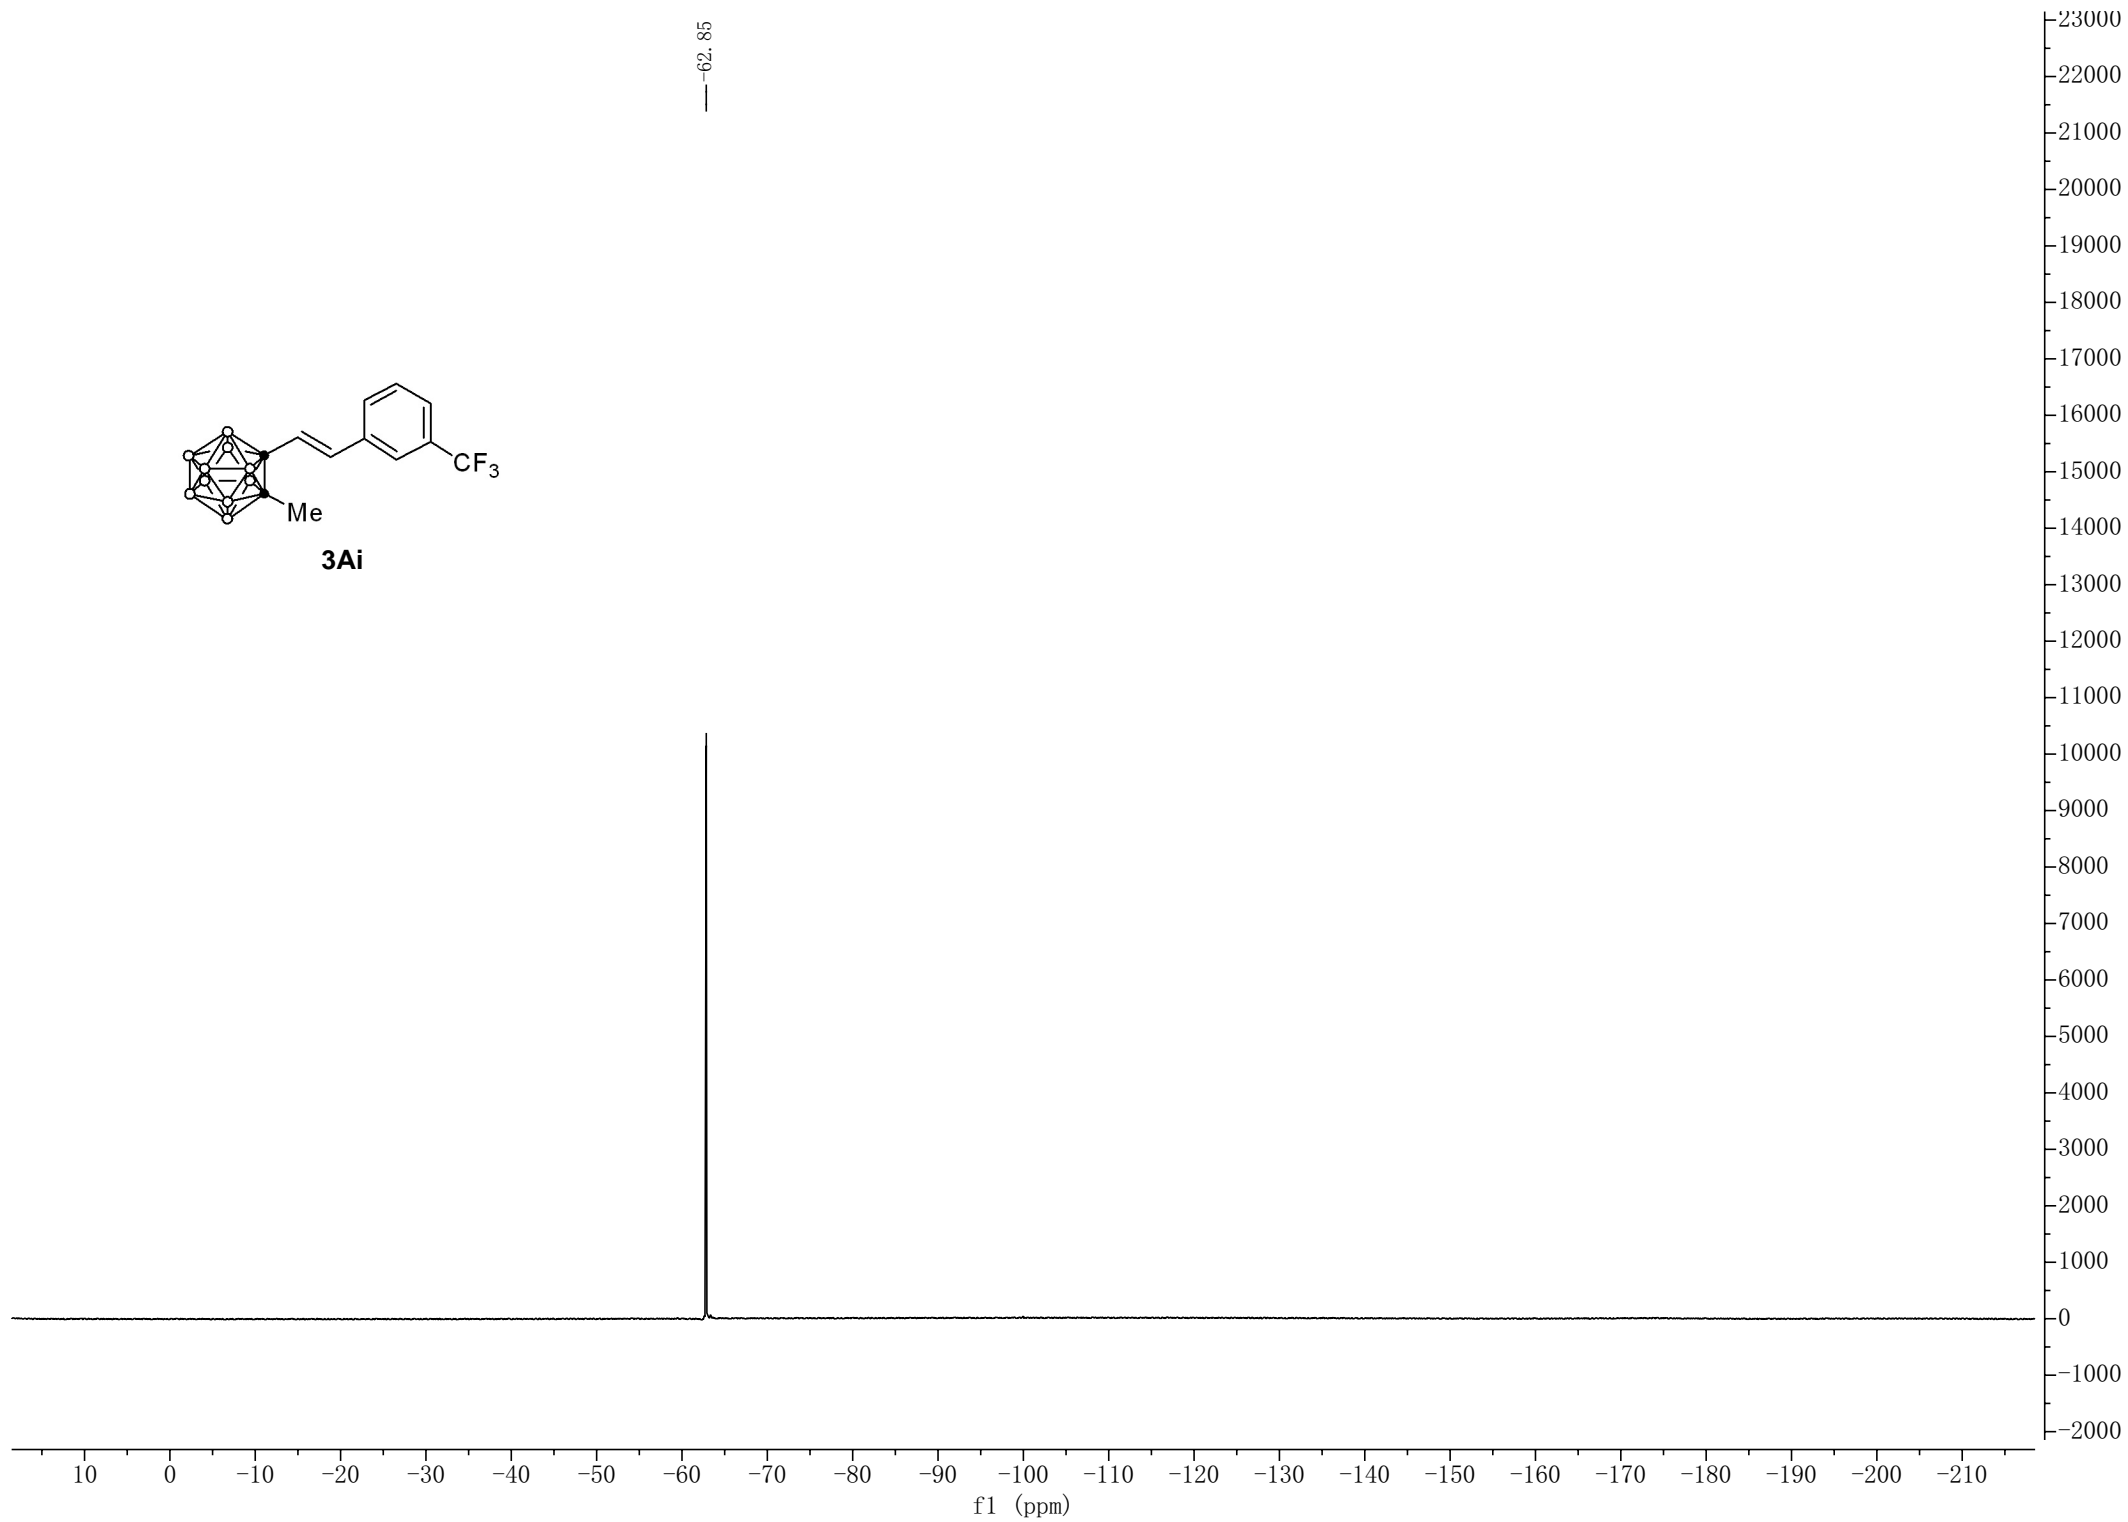

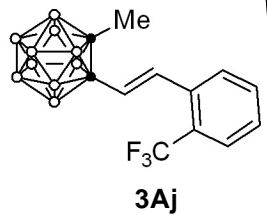

7.68  
7.66  
7.56  
7.54  
7.52  
7.50  
7.47  
7.45  
7.43  
7.41  
7.37  
7.24

6.20  
6.16

1.97

1.55

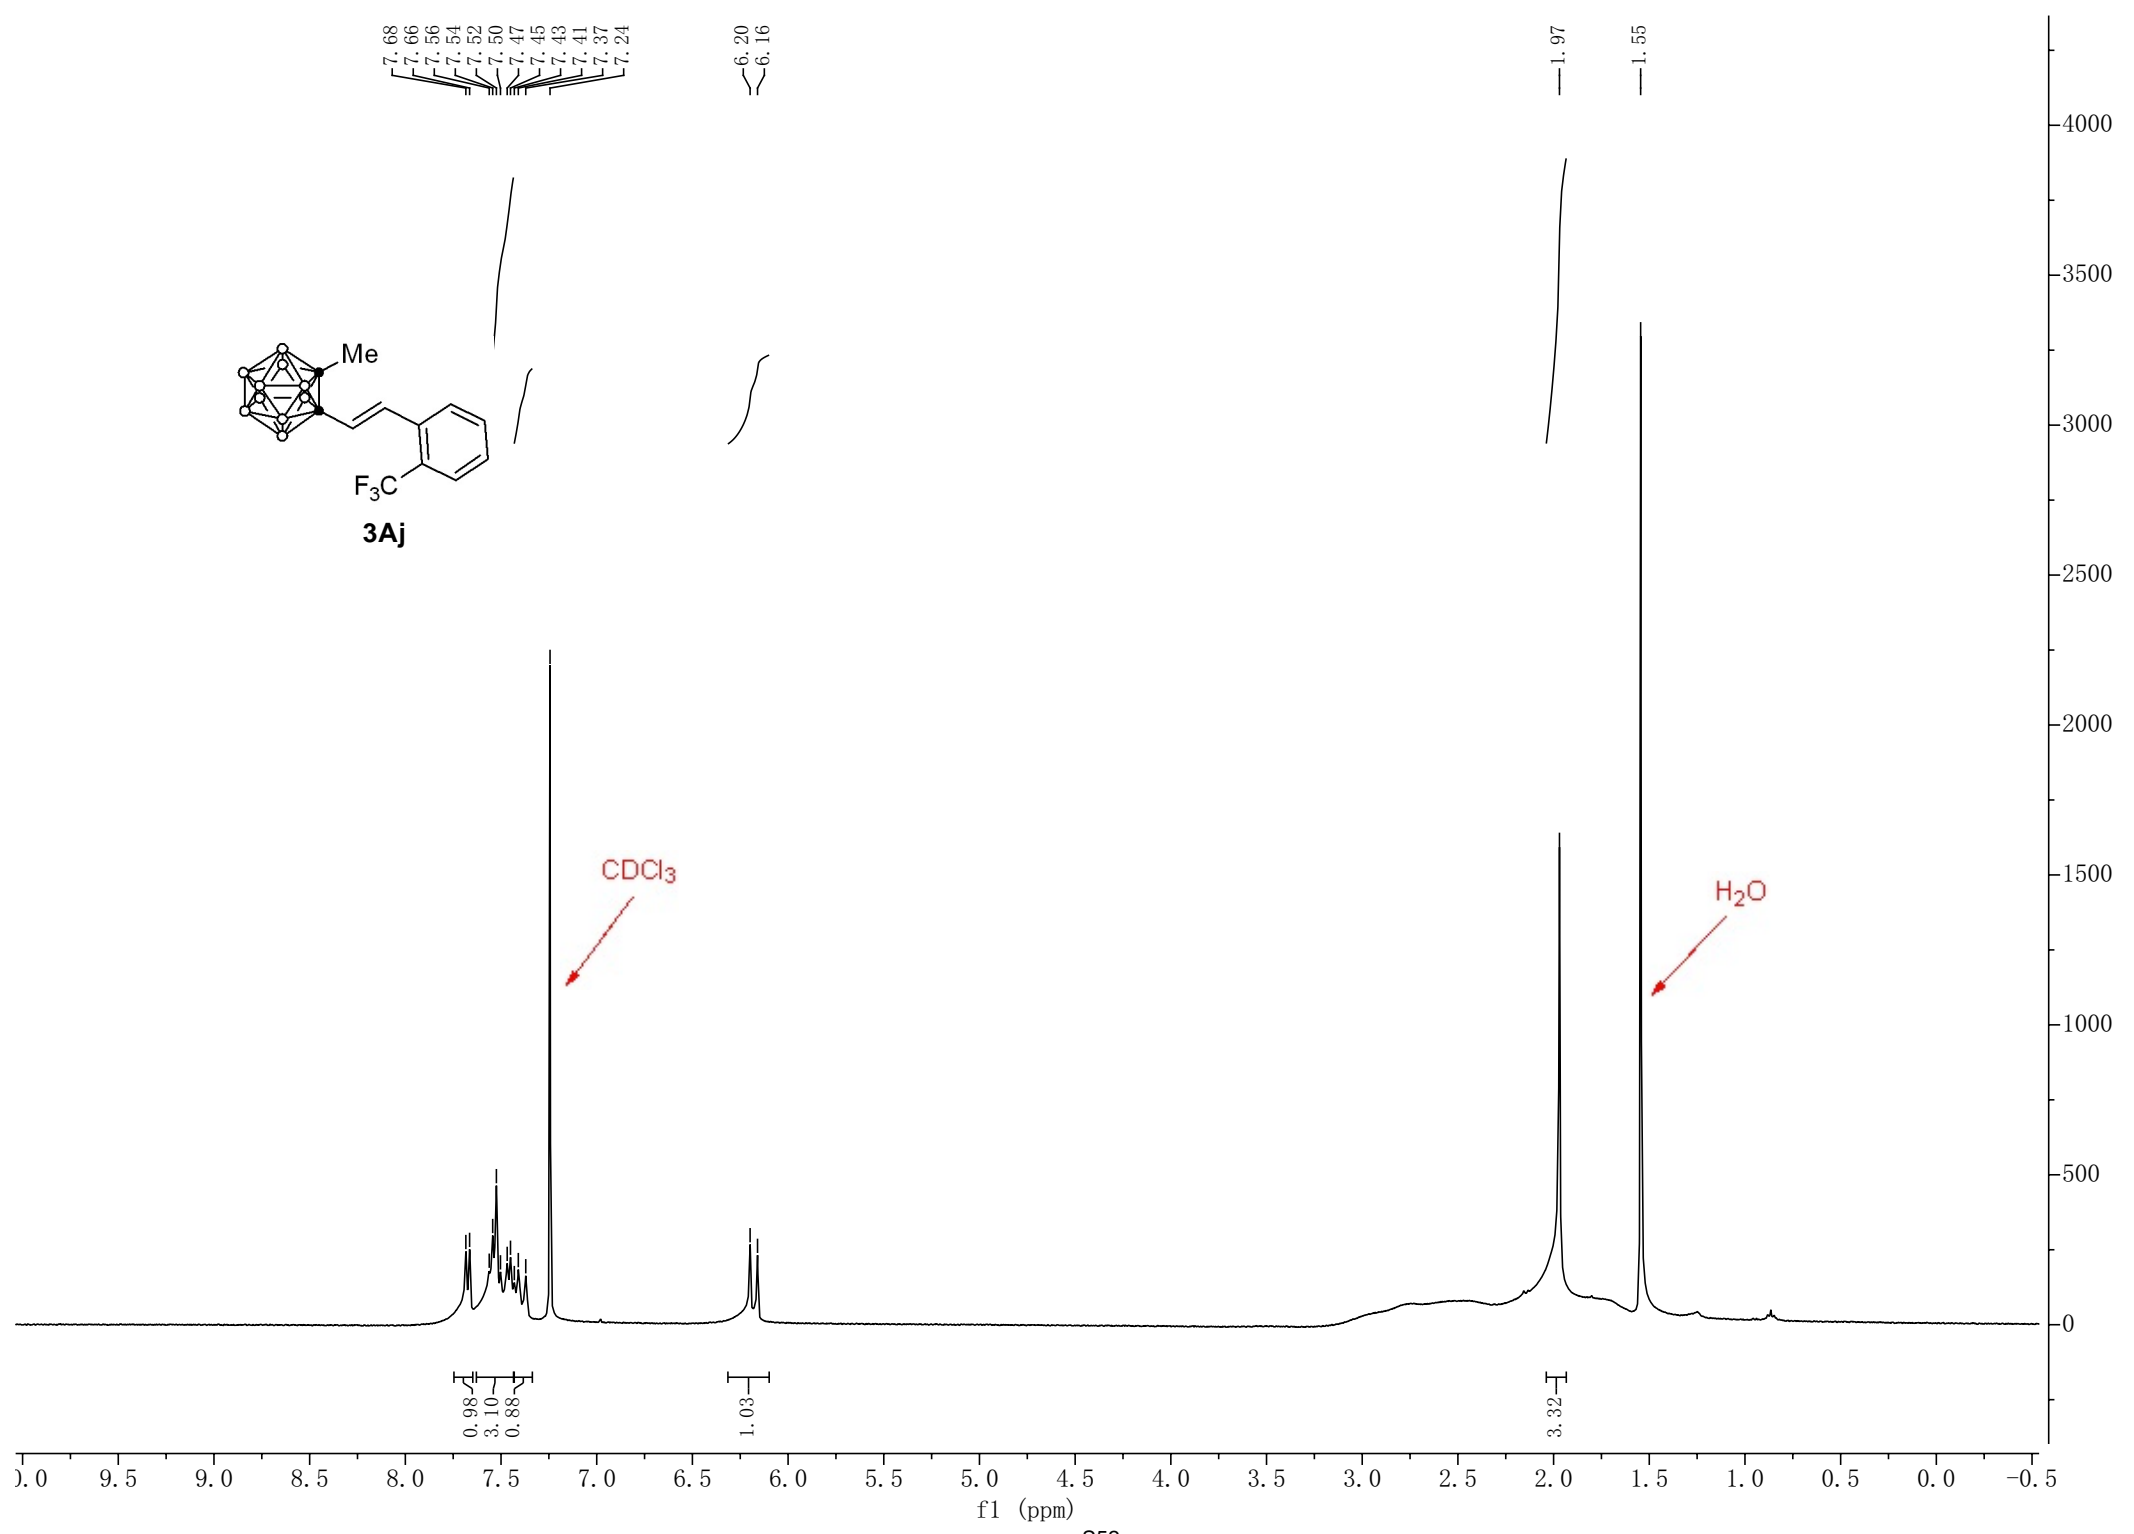

CDCl<sub>3</sub>

H<sub>2</sub>O

f1 (ppm)

S52

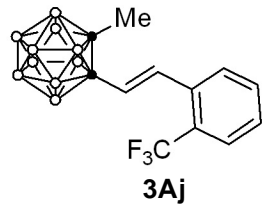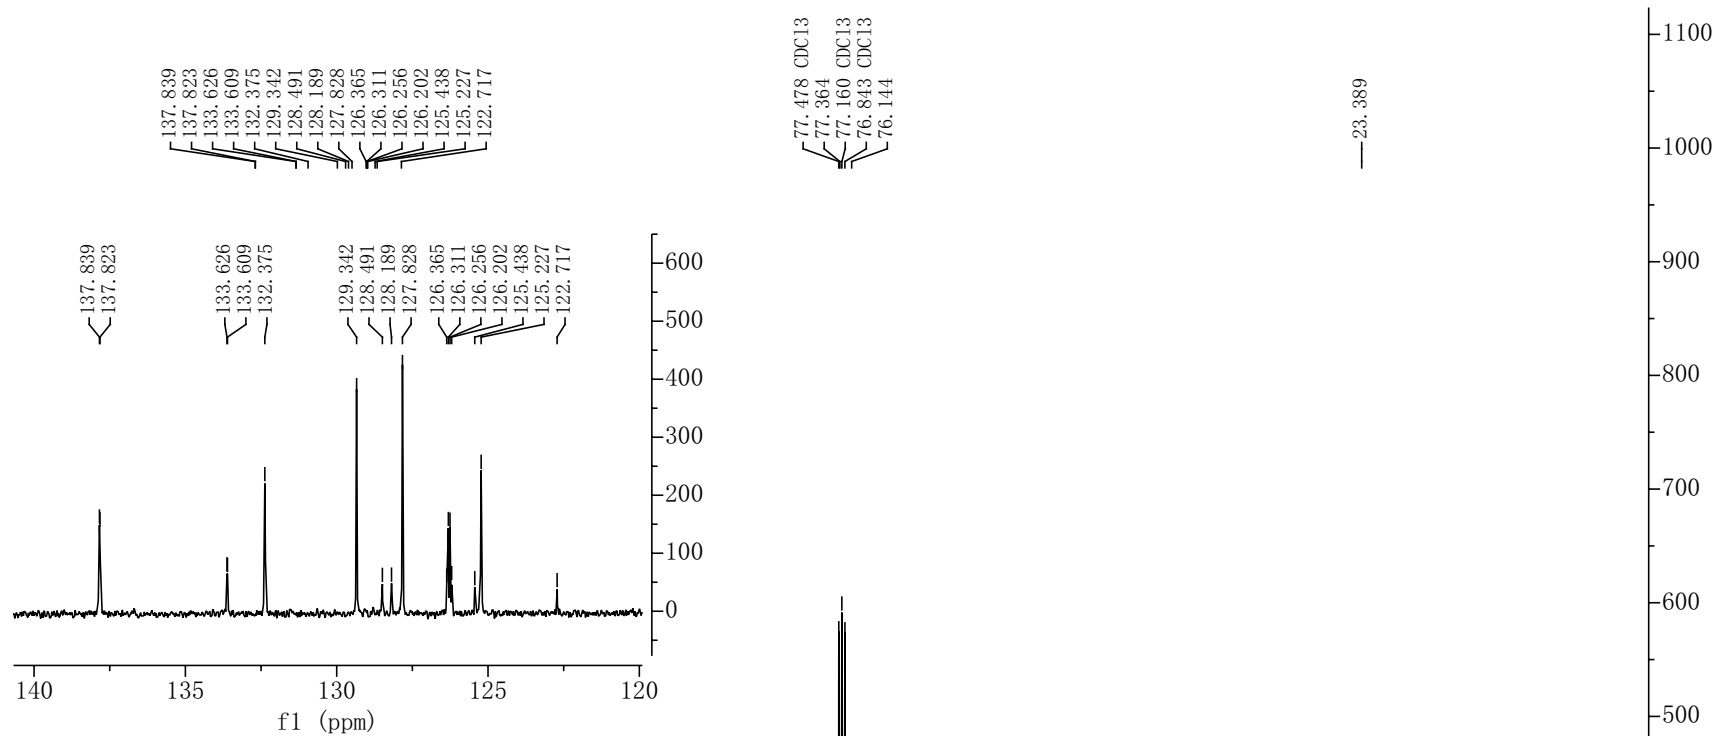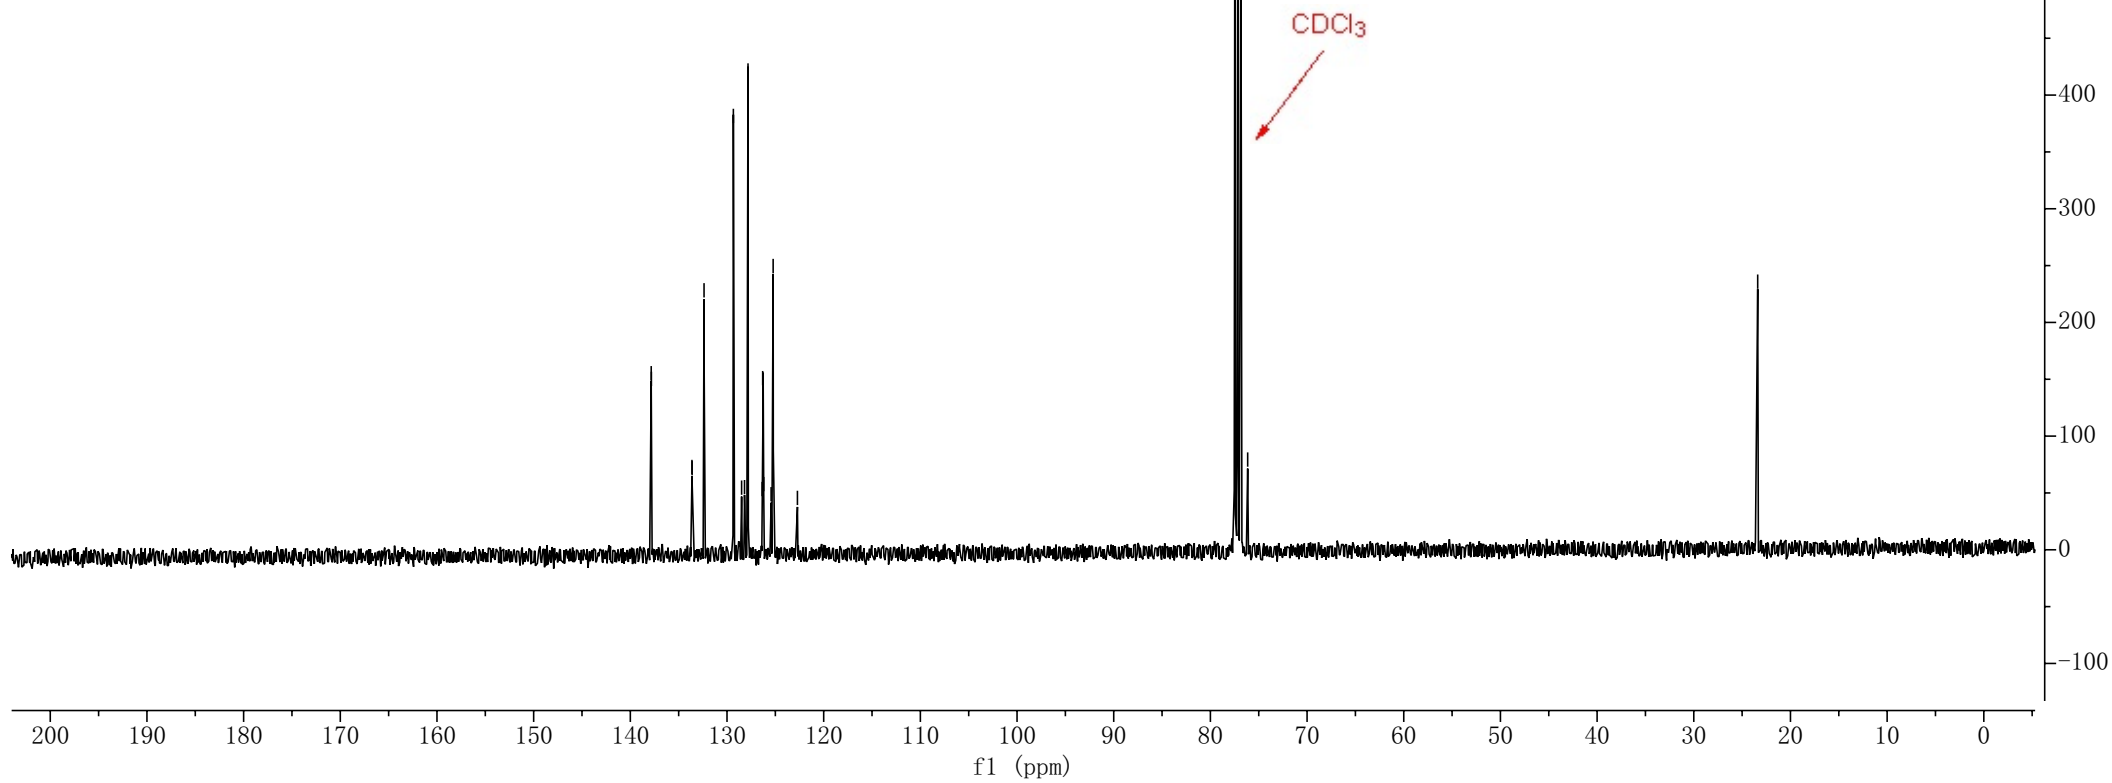

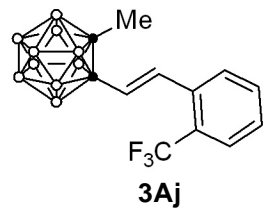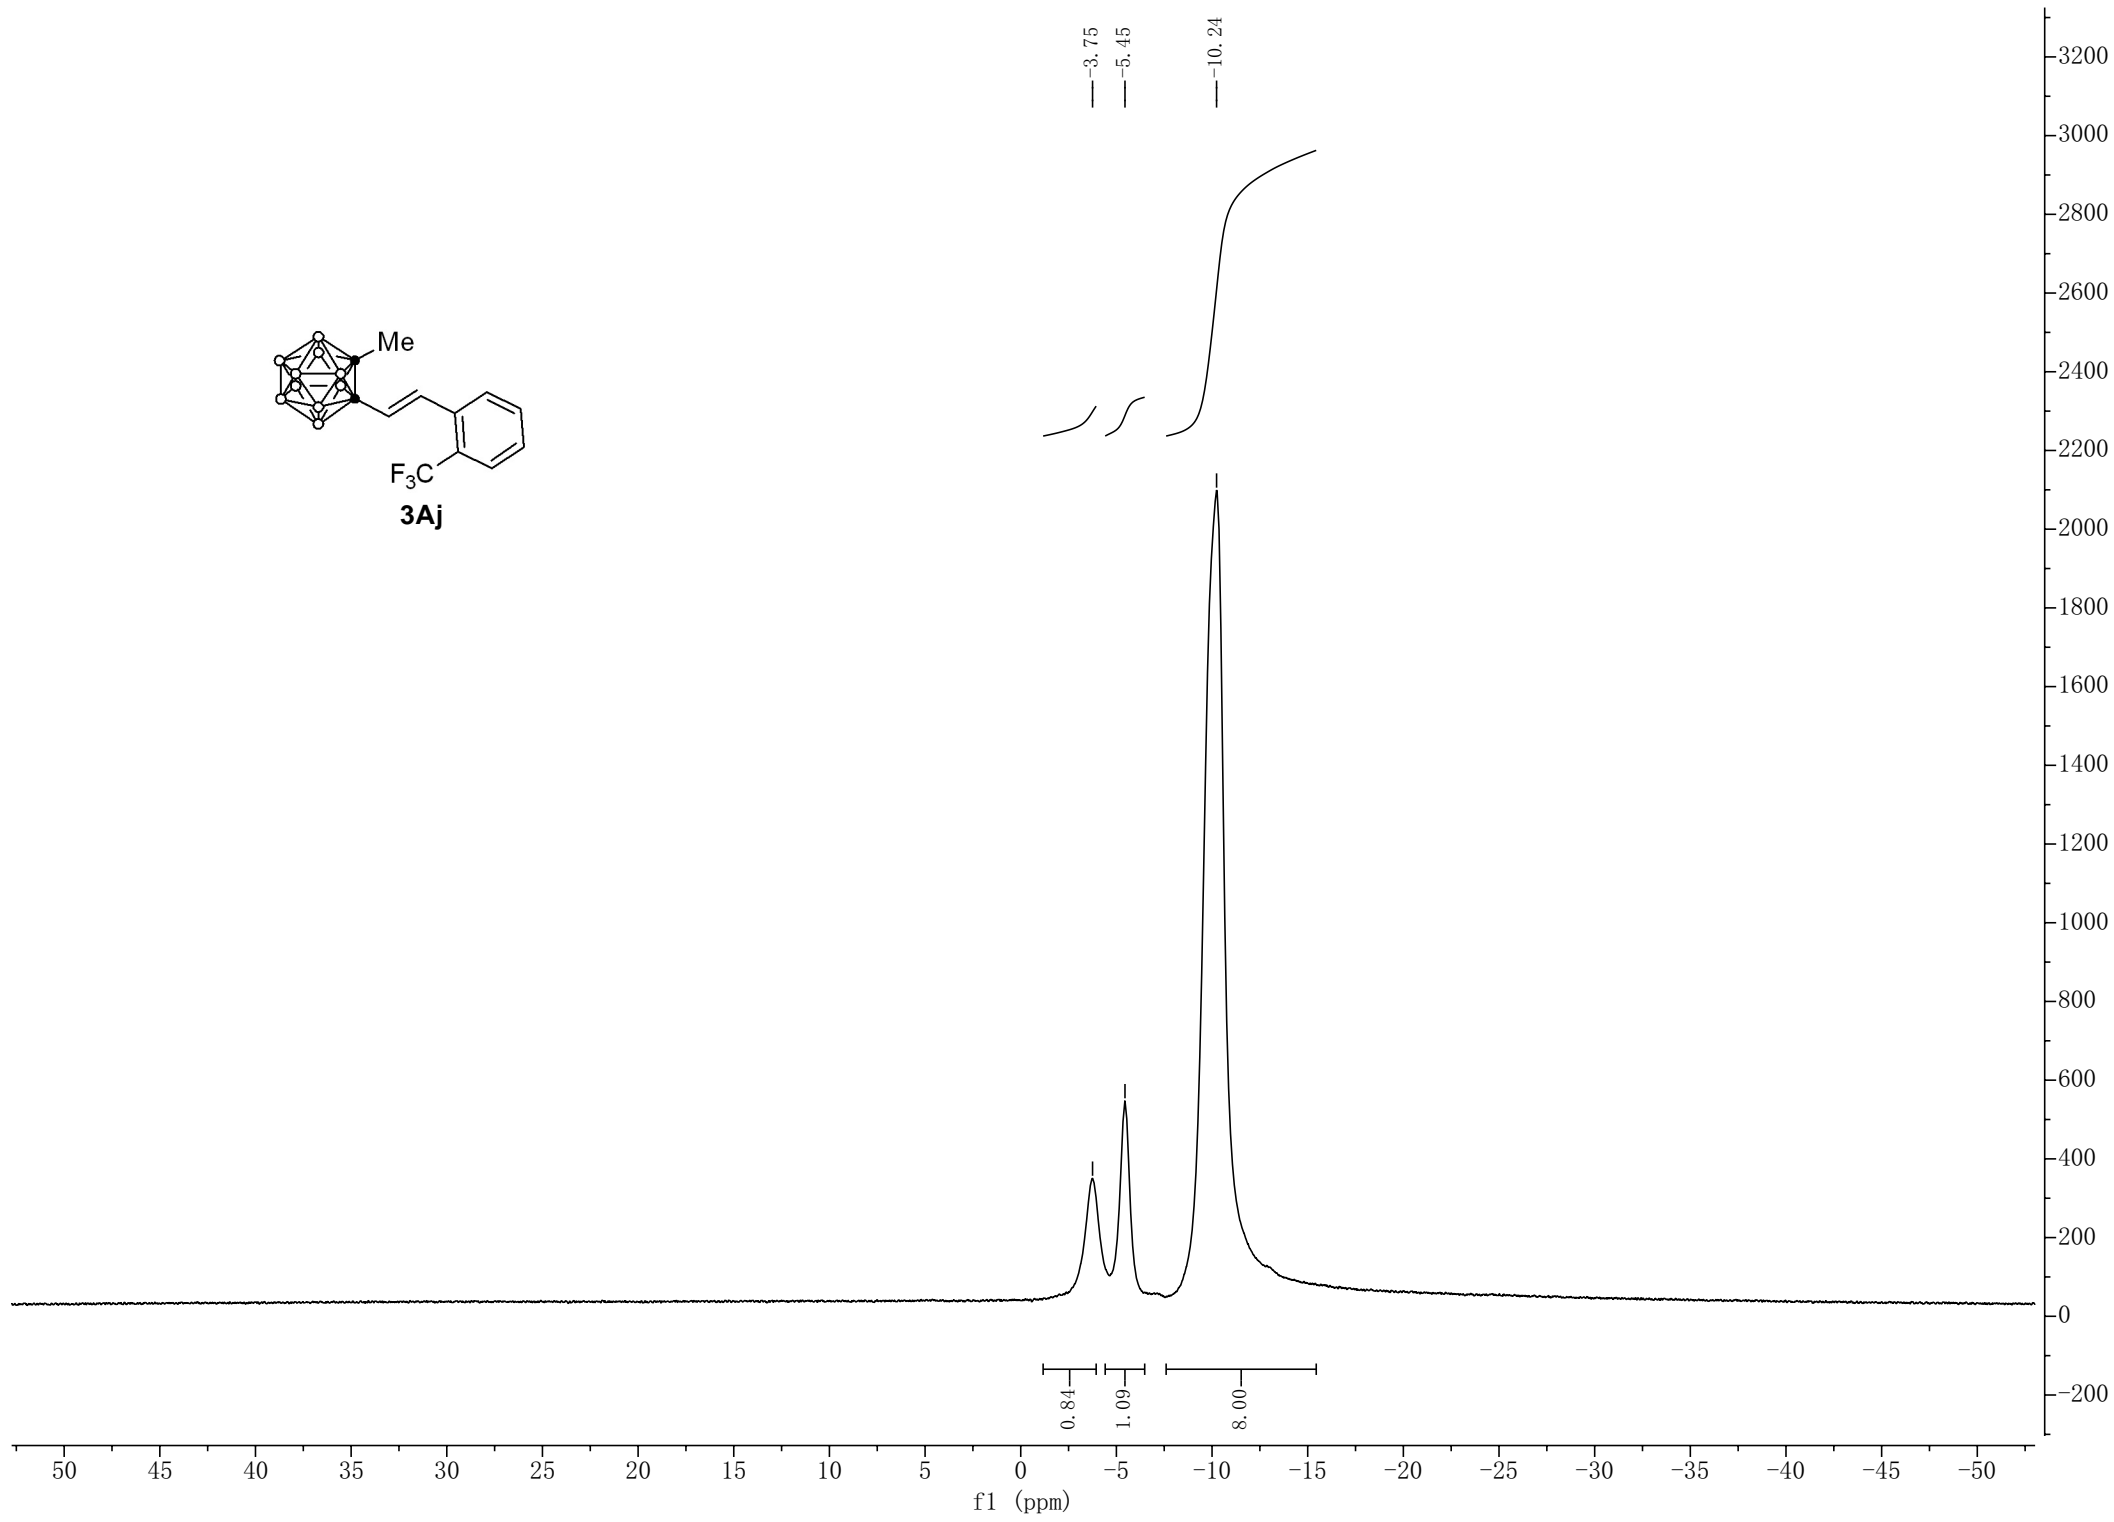

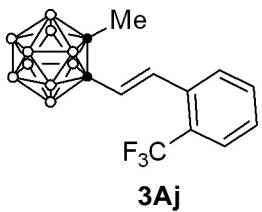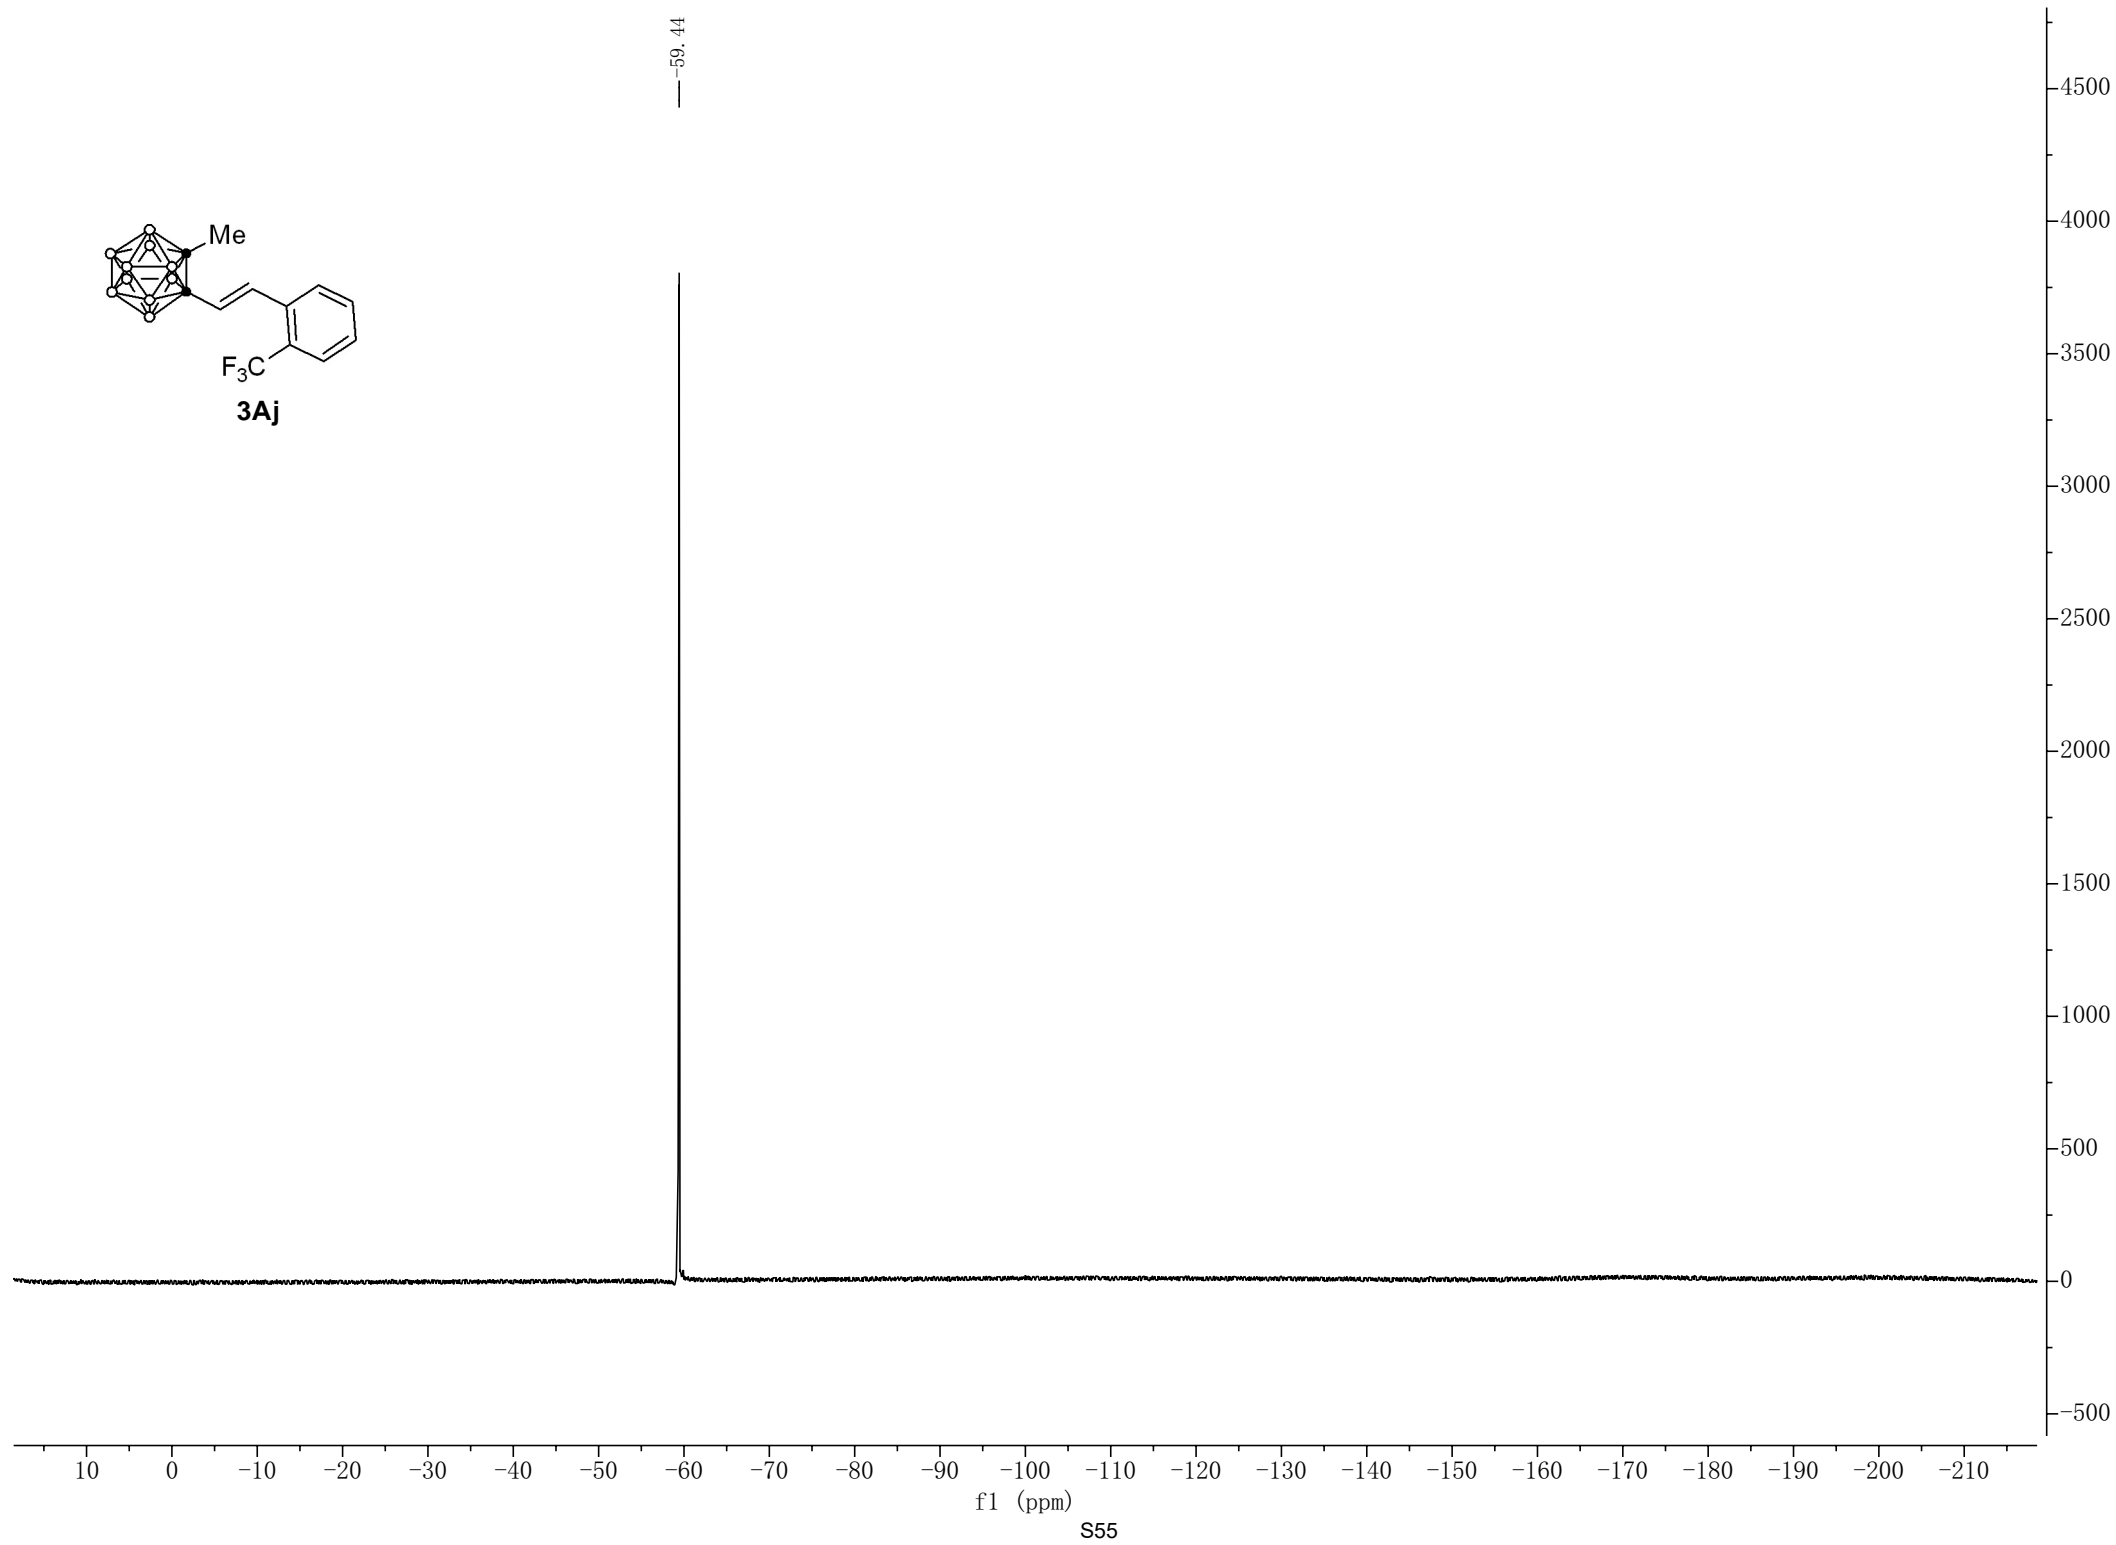

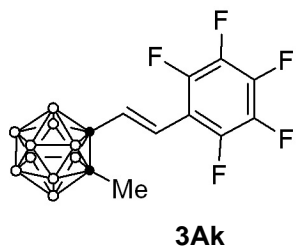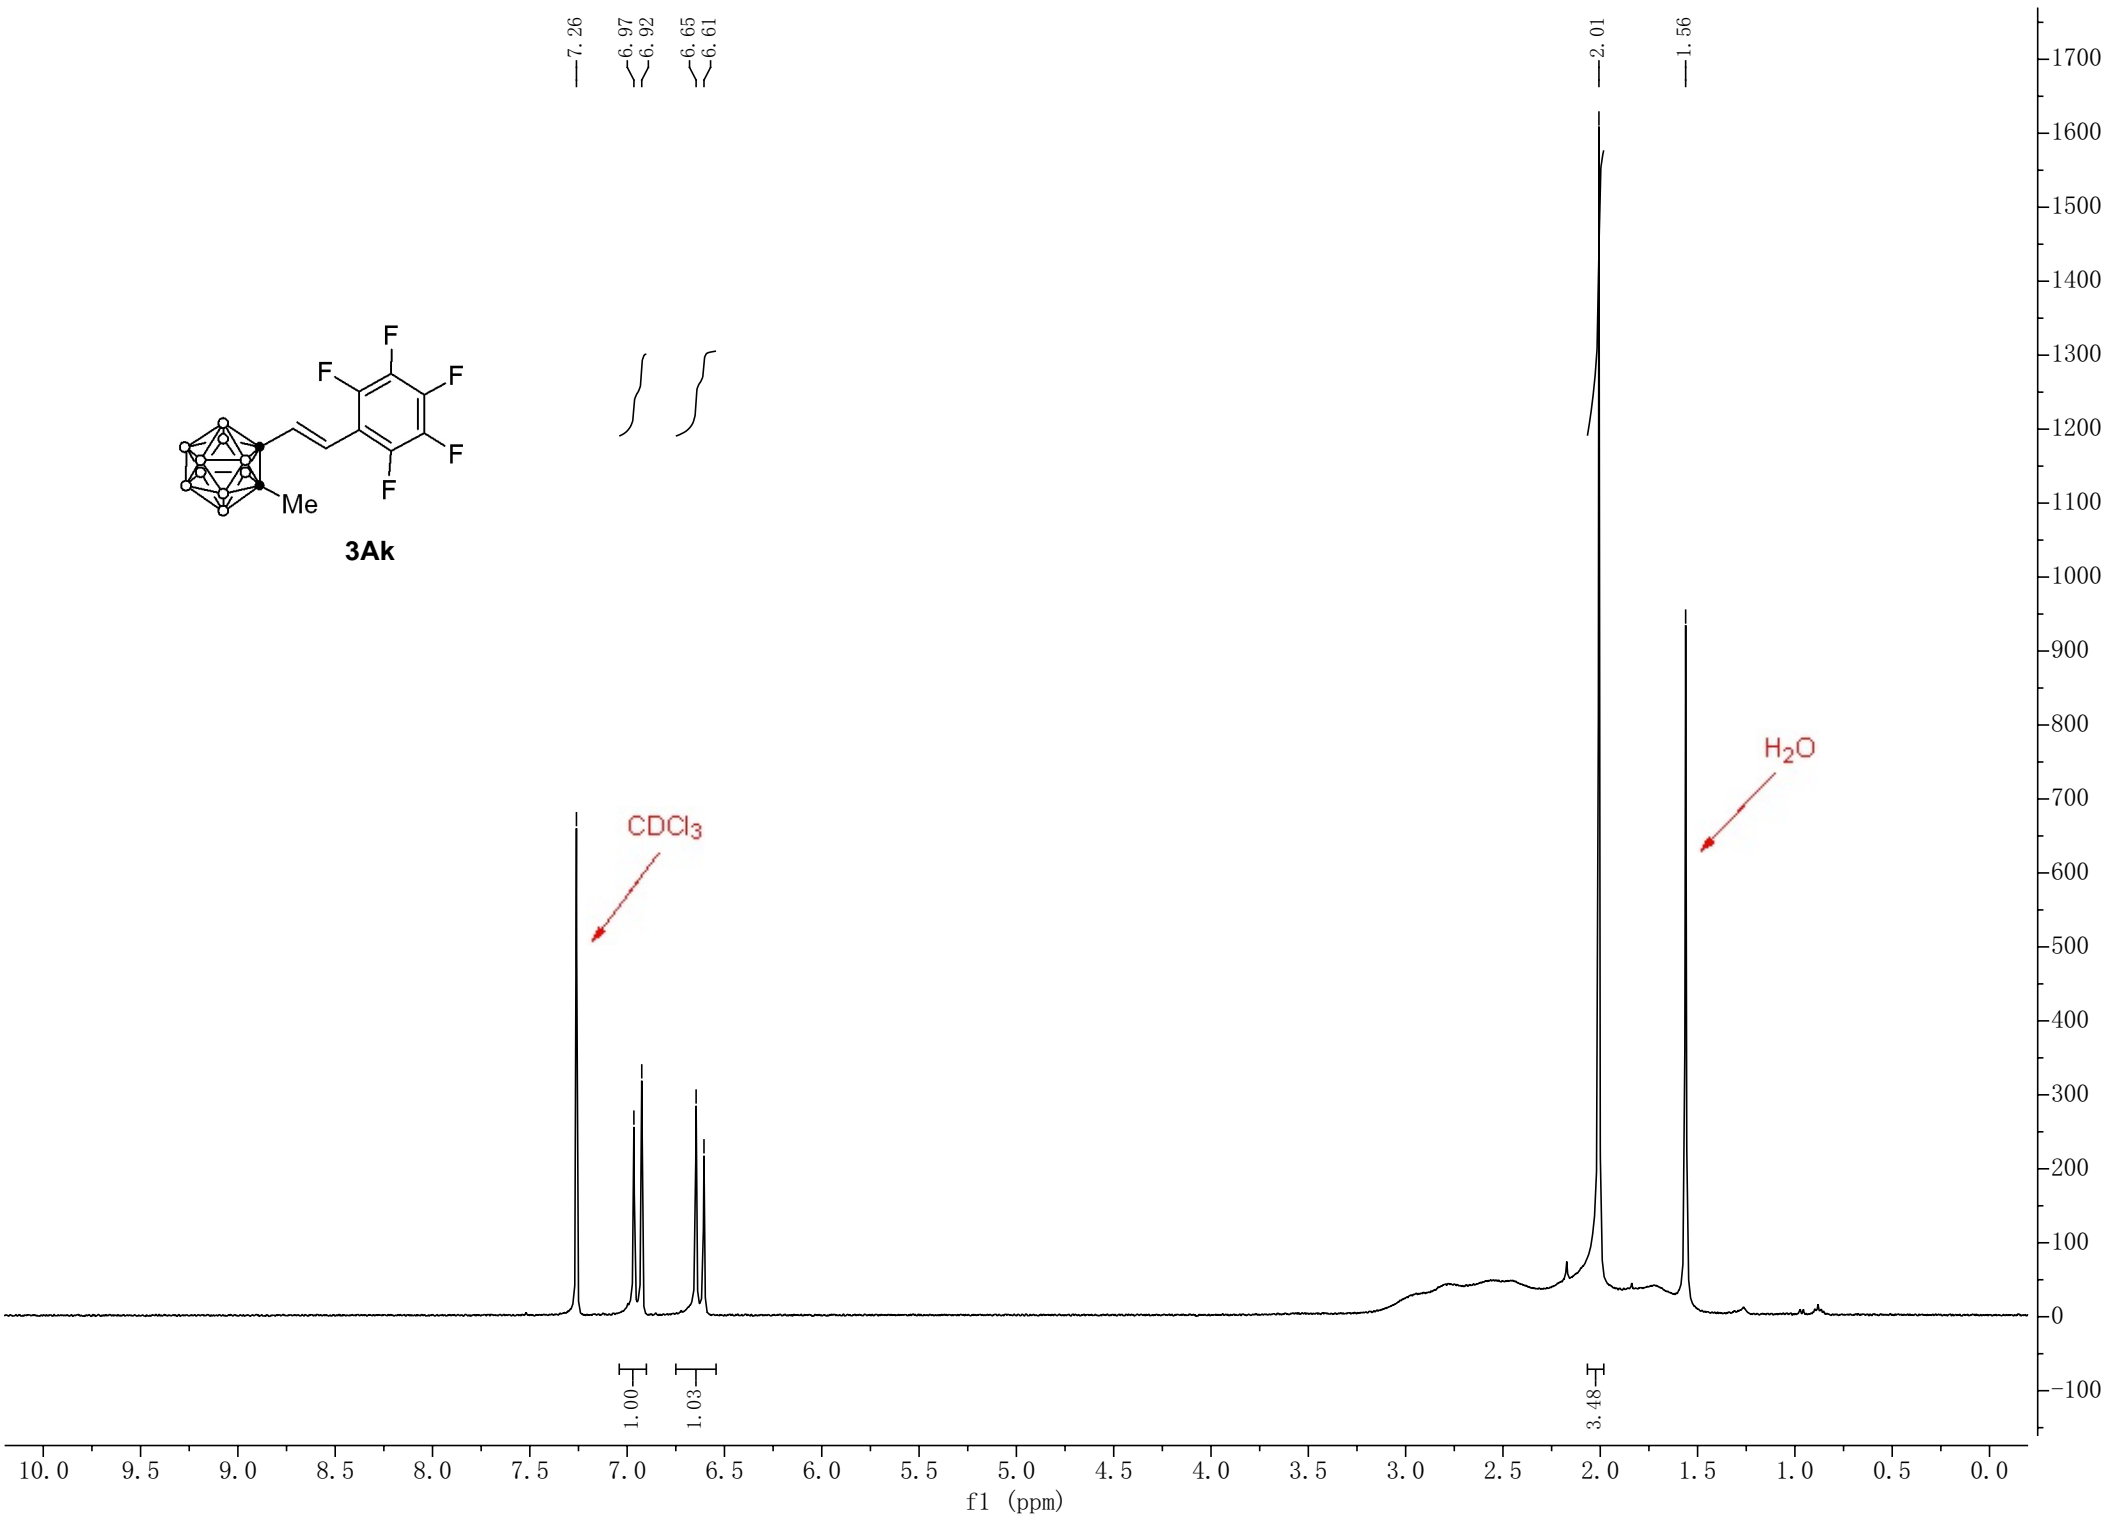



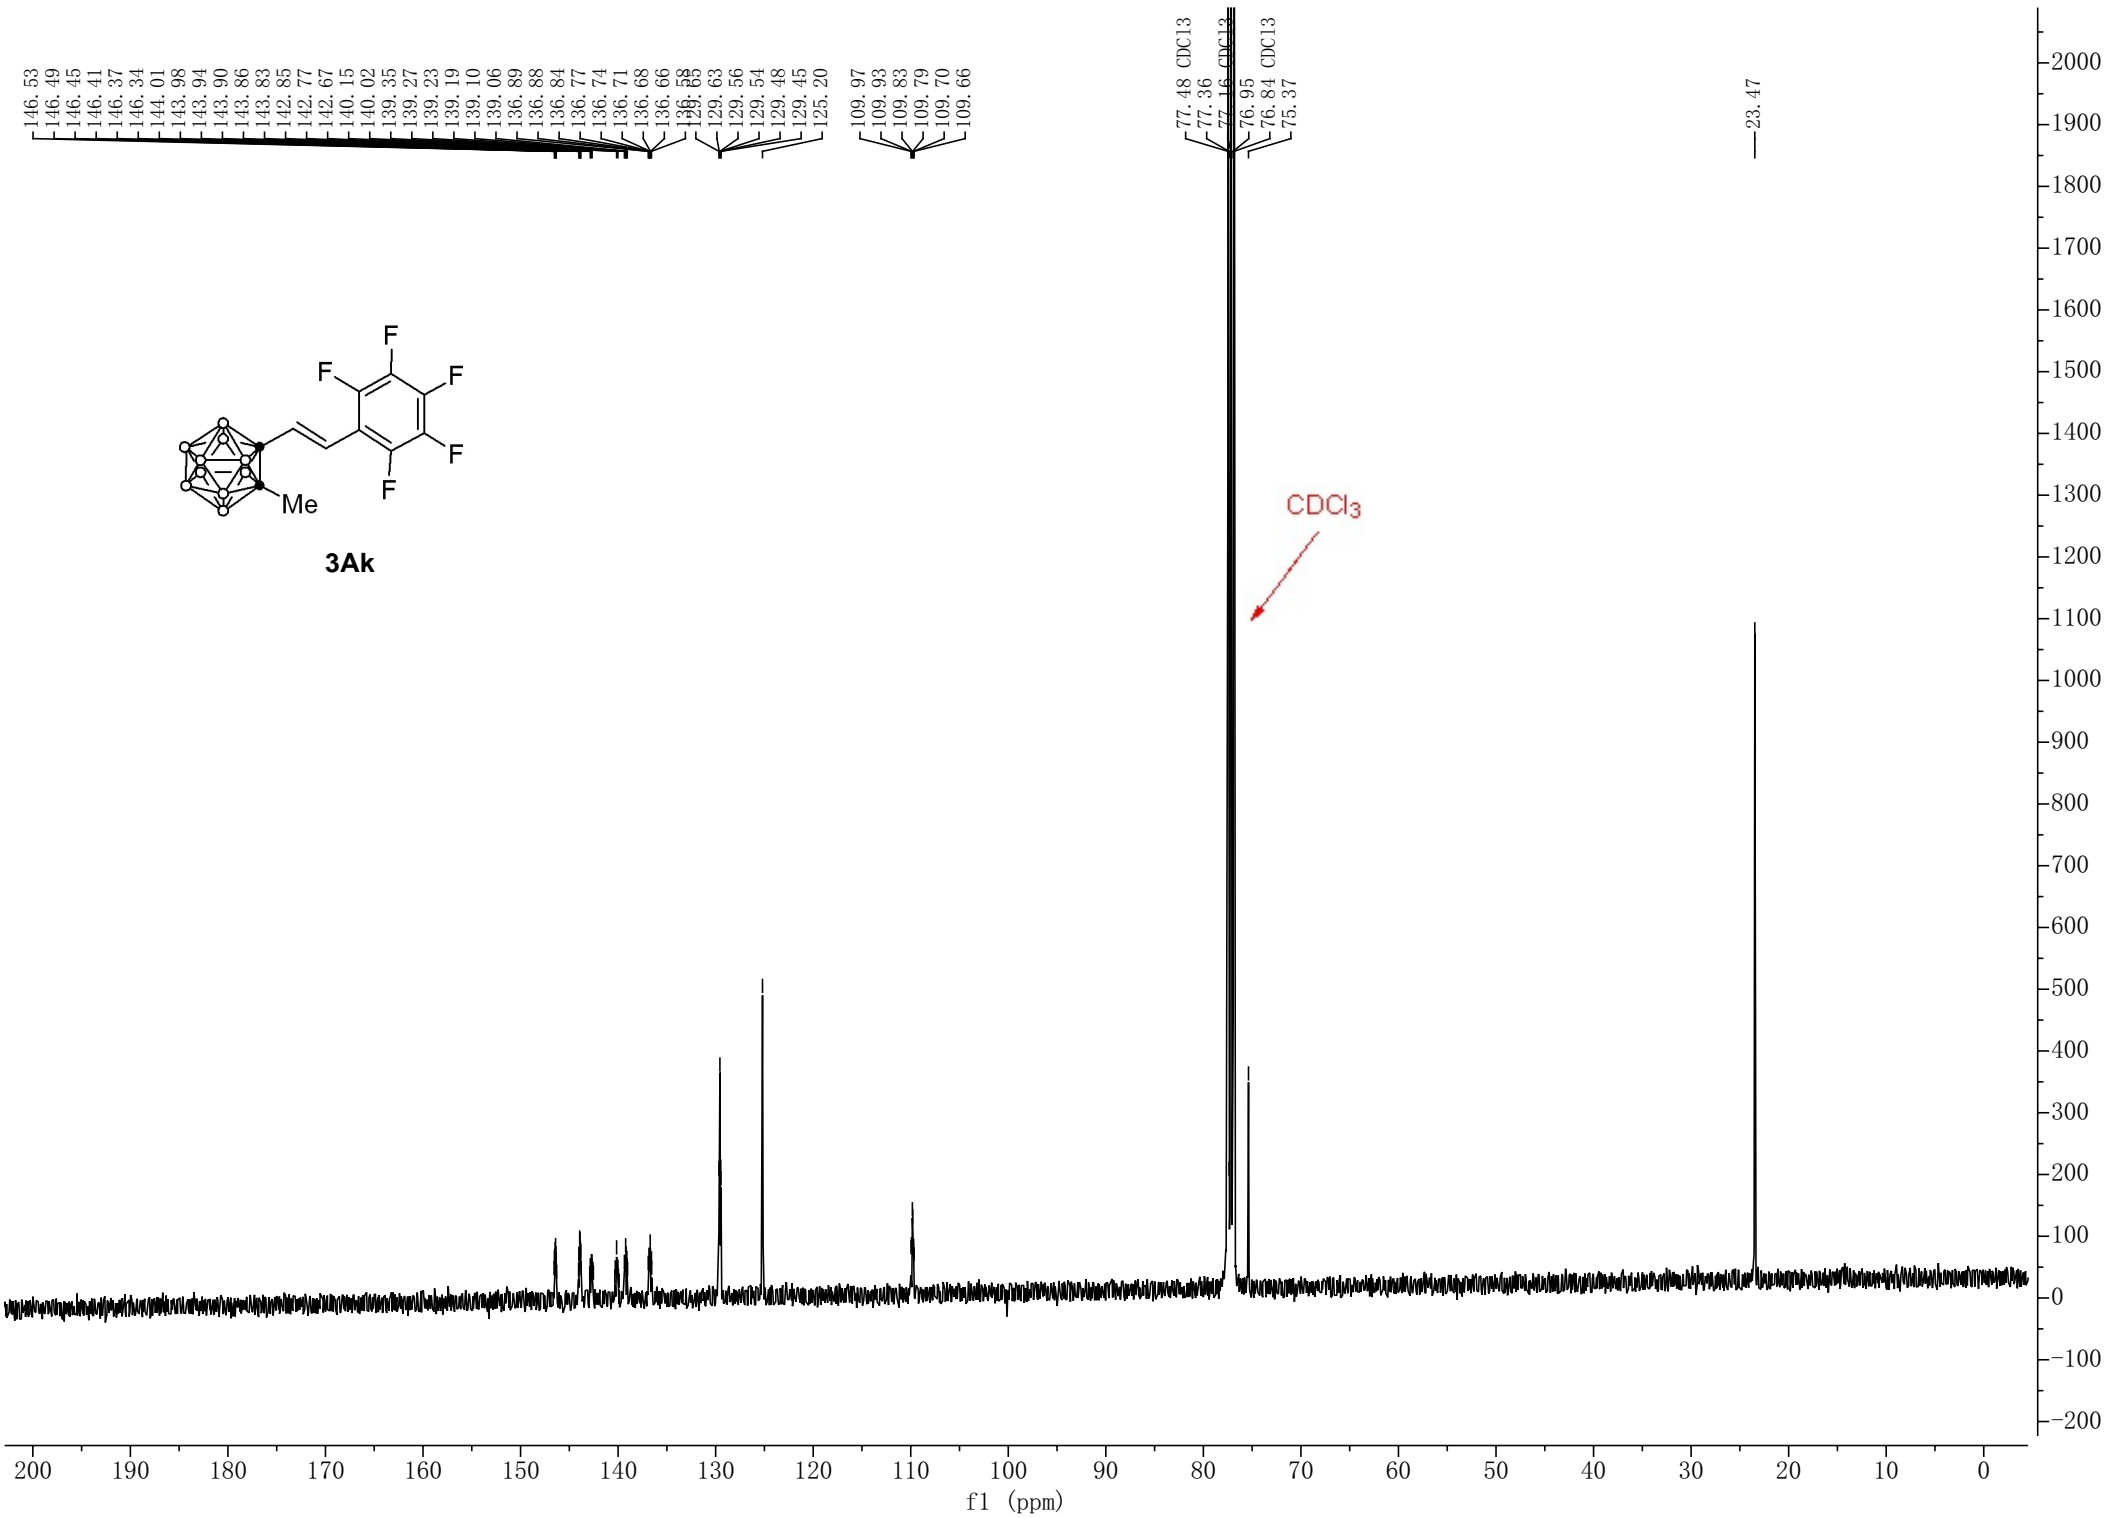



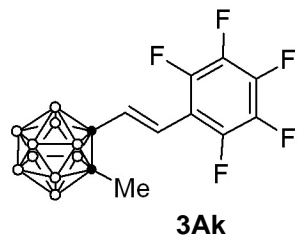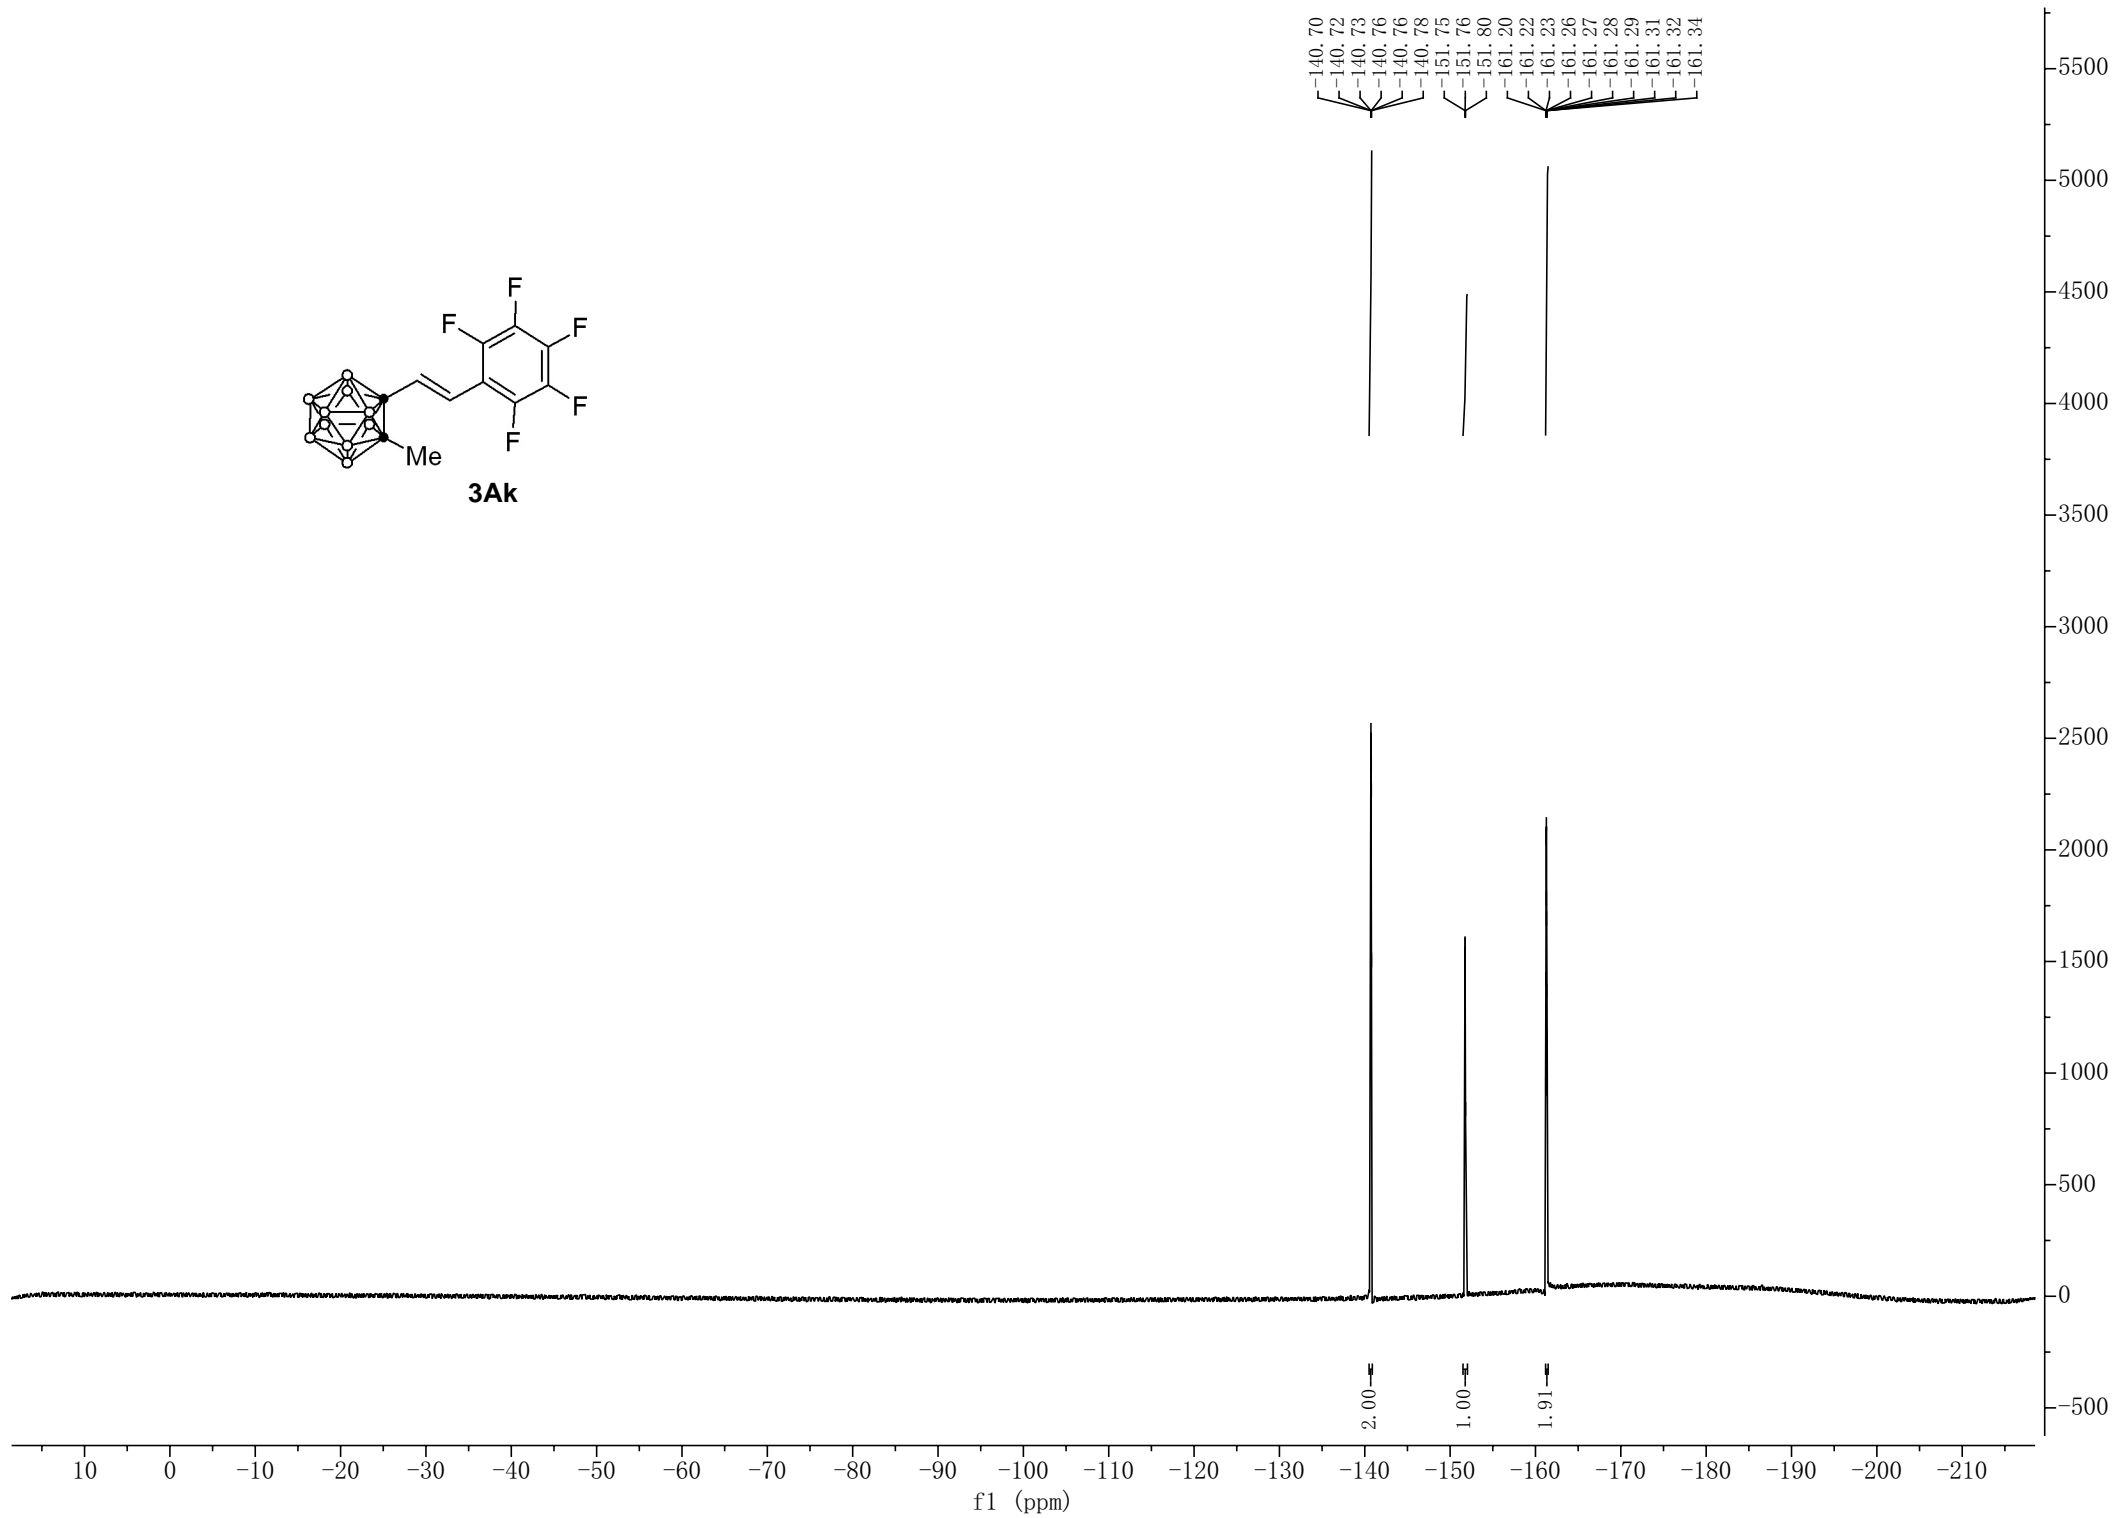

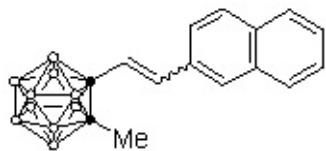

3AI

7.865  
7.856  
7.847  
7.826  
7.683  
7.575  
7.572  
7.553  
7.550  
7.542  
7.537  
7.528  
7.521  
7.513  
7.505  
7.312  
7.309  
7.291  
7.288  
7.260  
7.185  
7.156  
7.146  
6.432  
6.393  
5.924  
5.892

2.034  
2.020

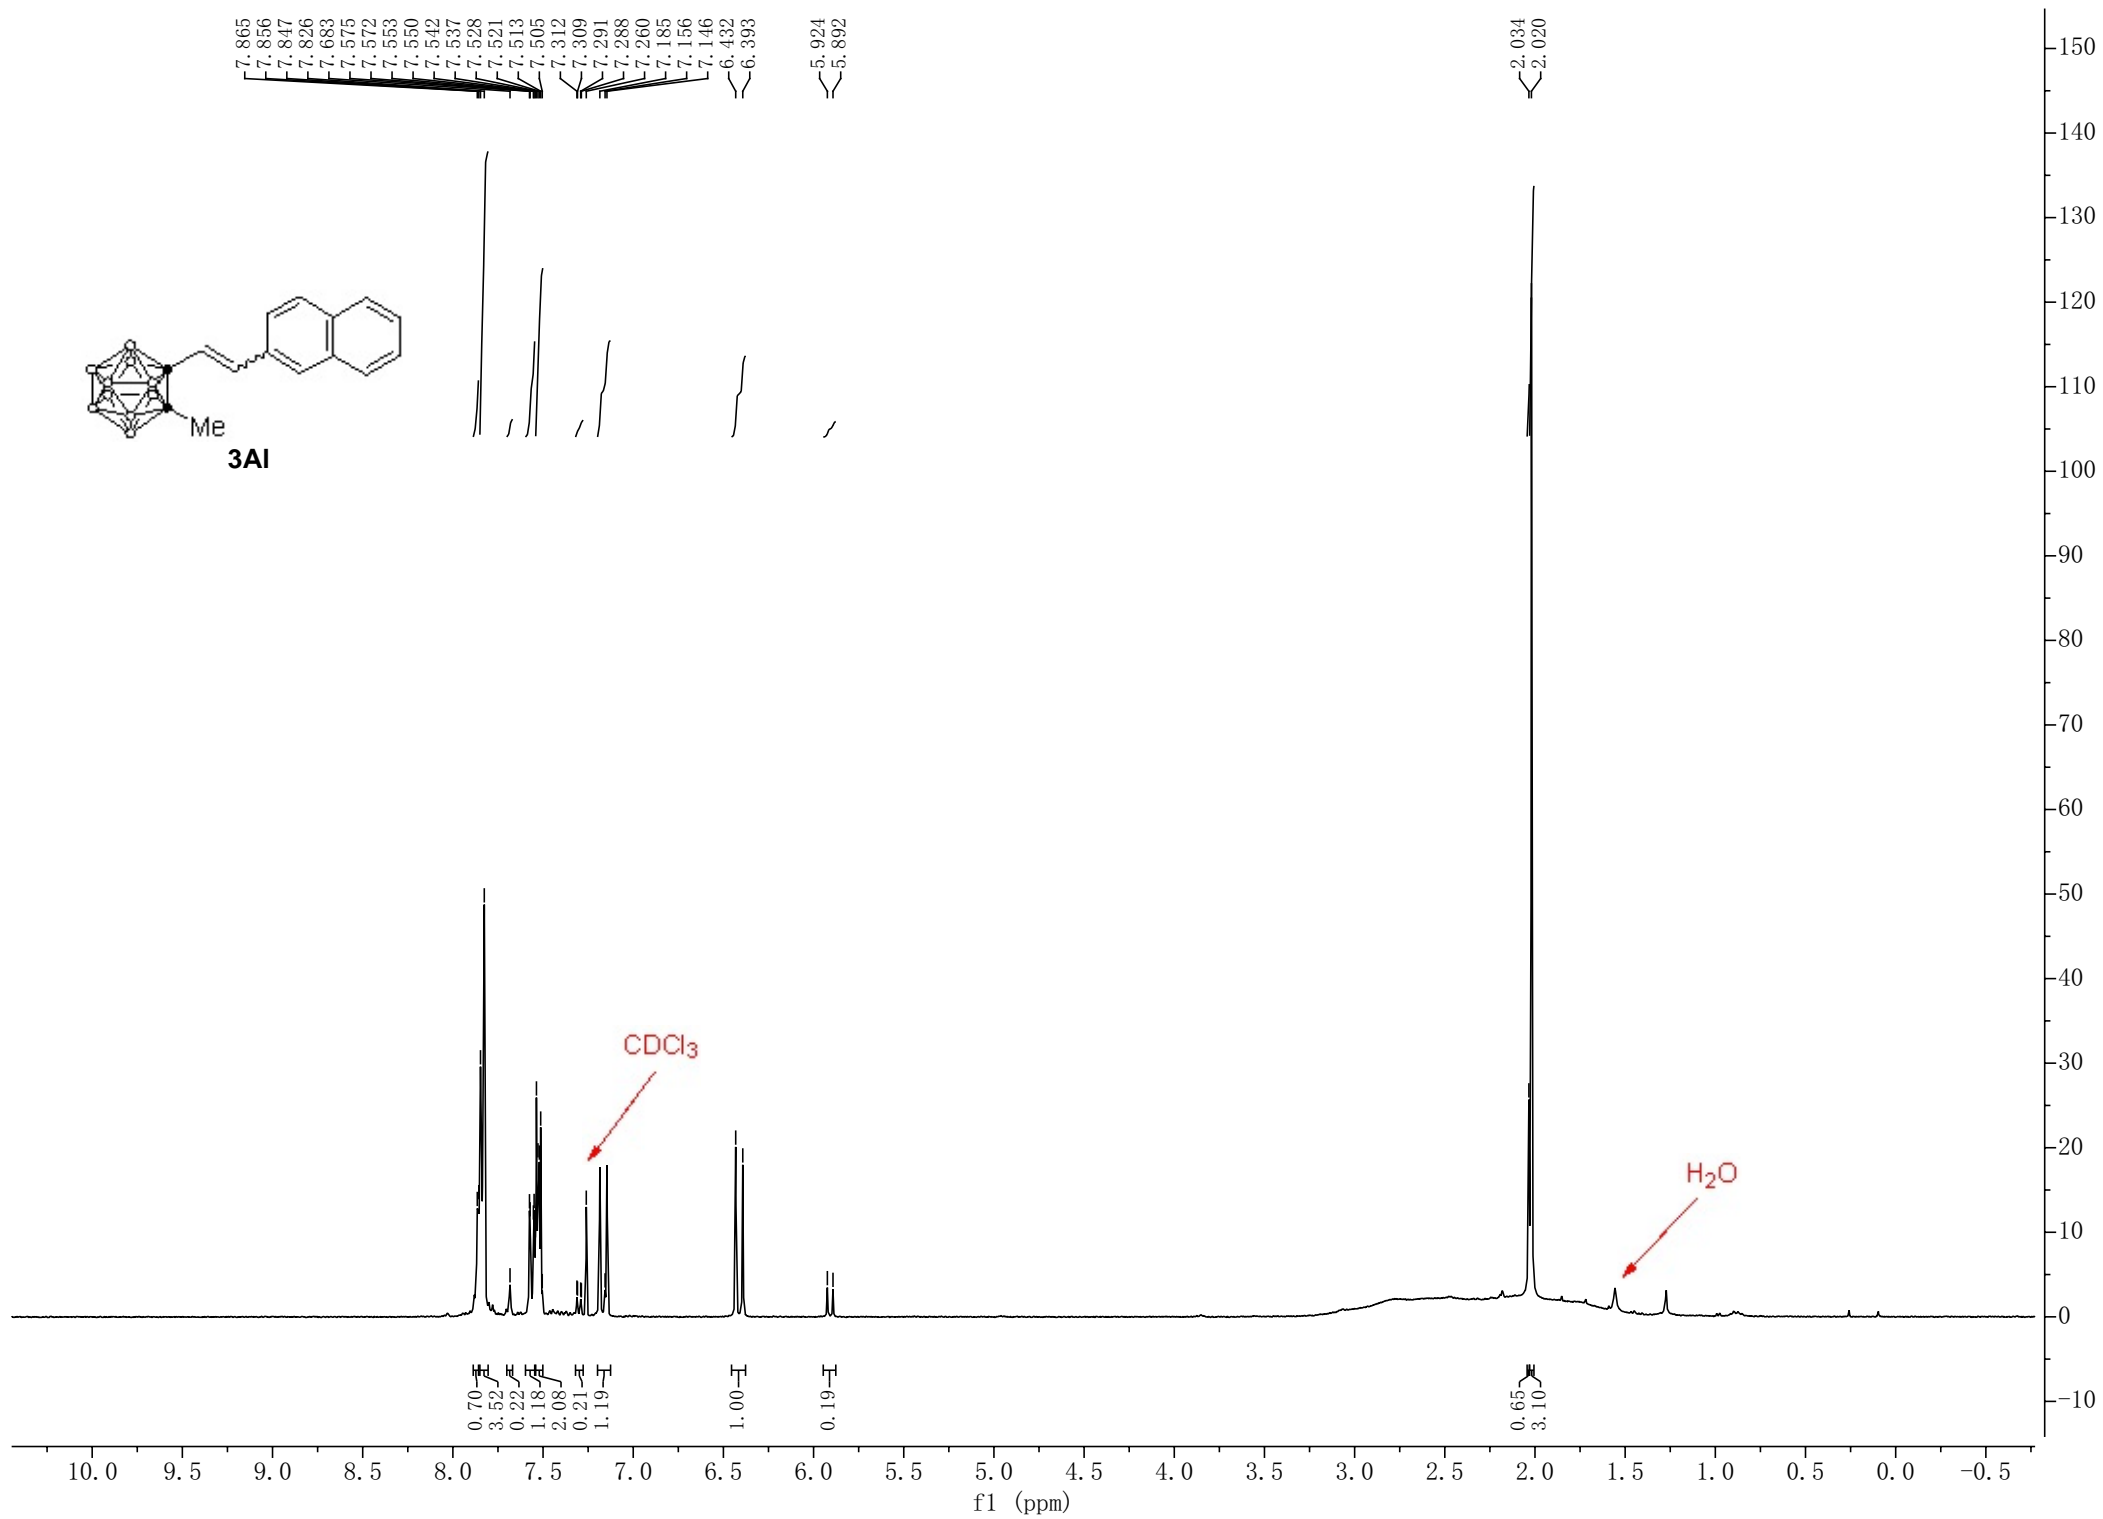

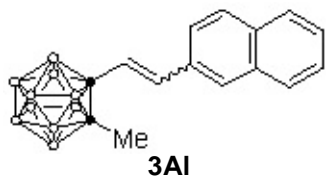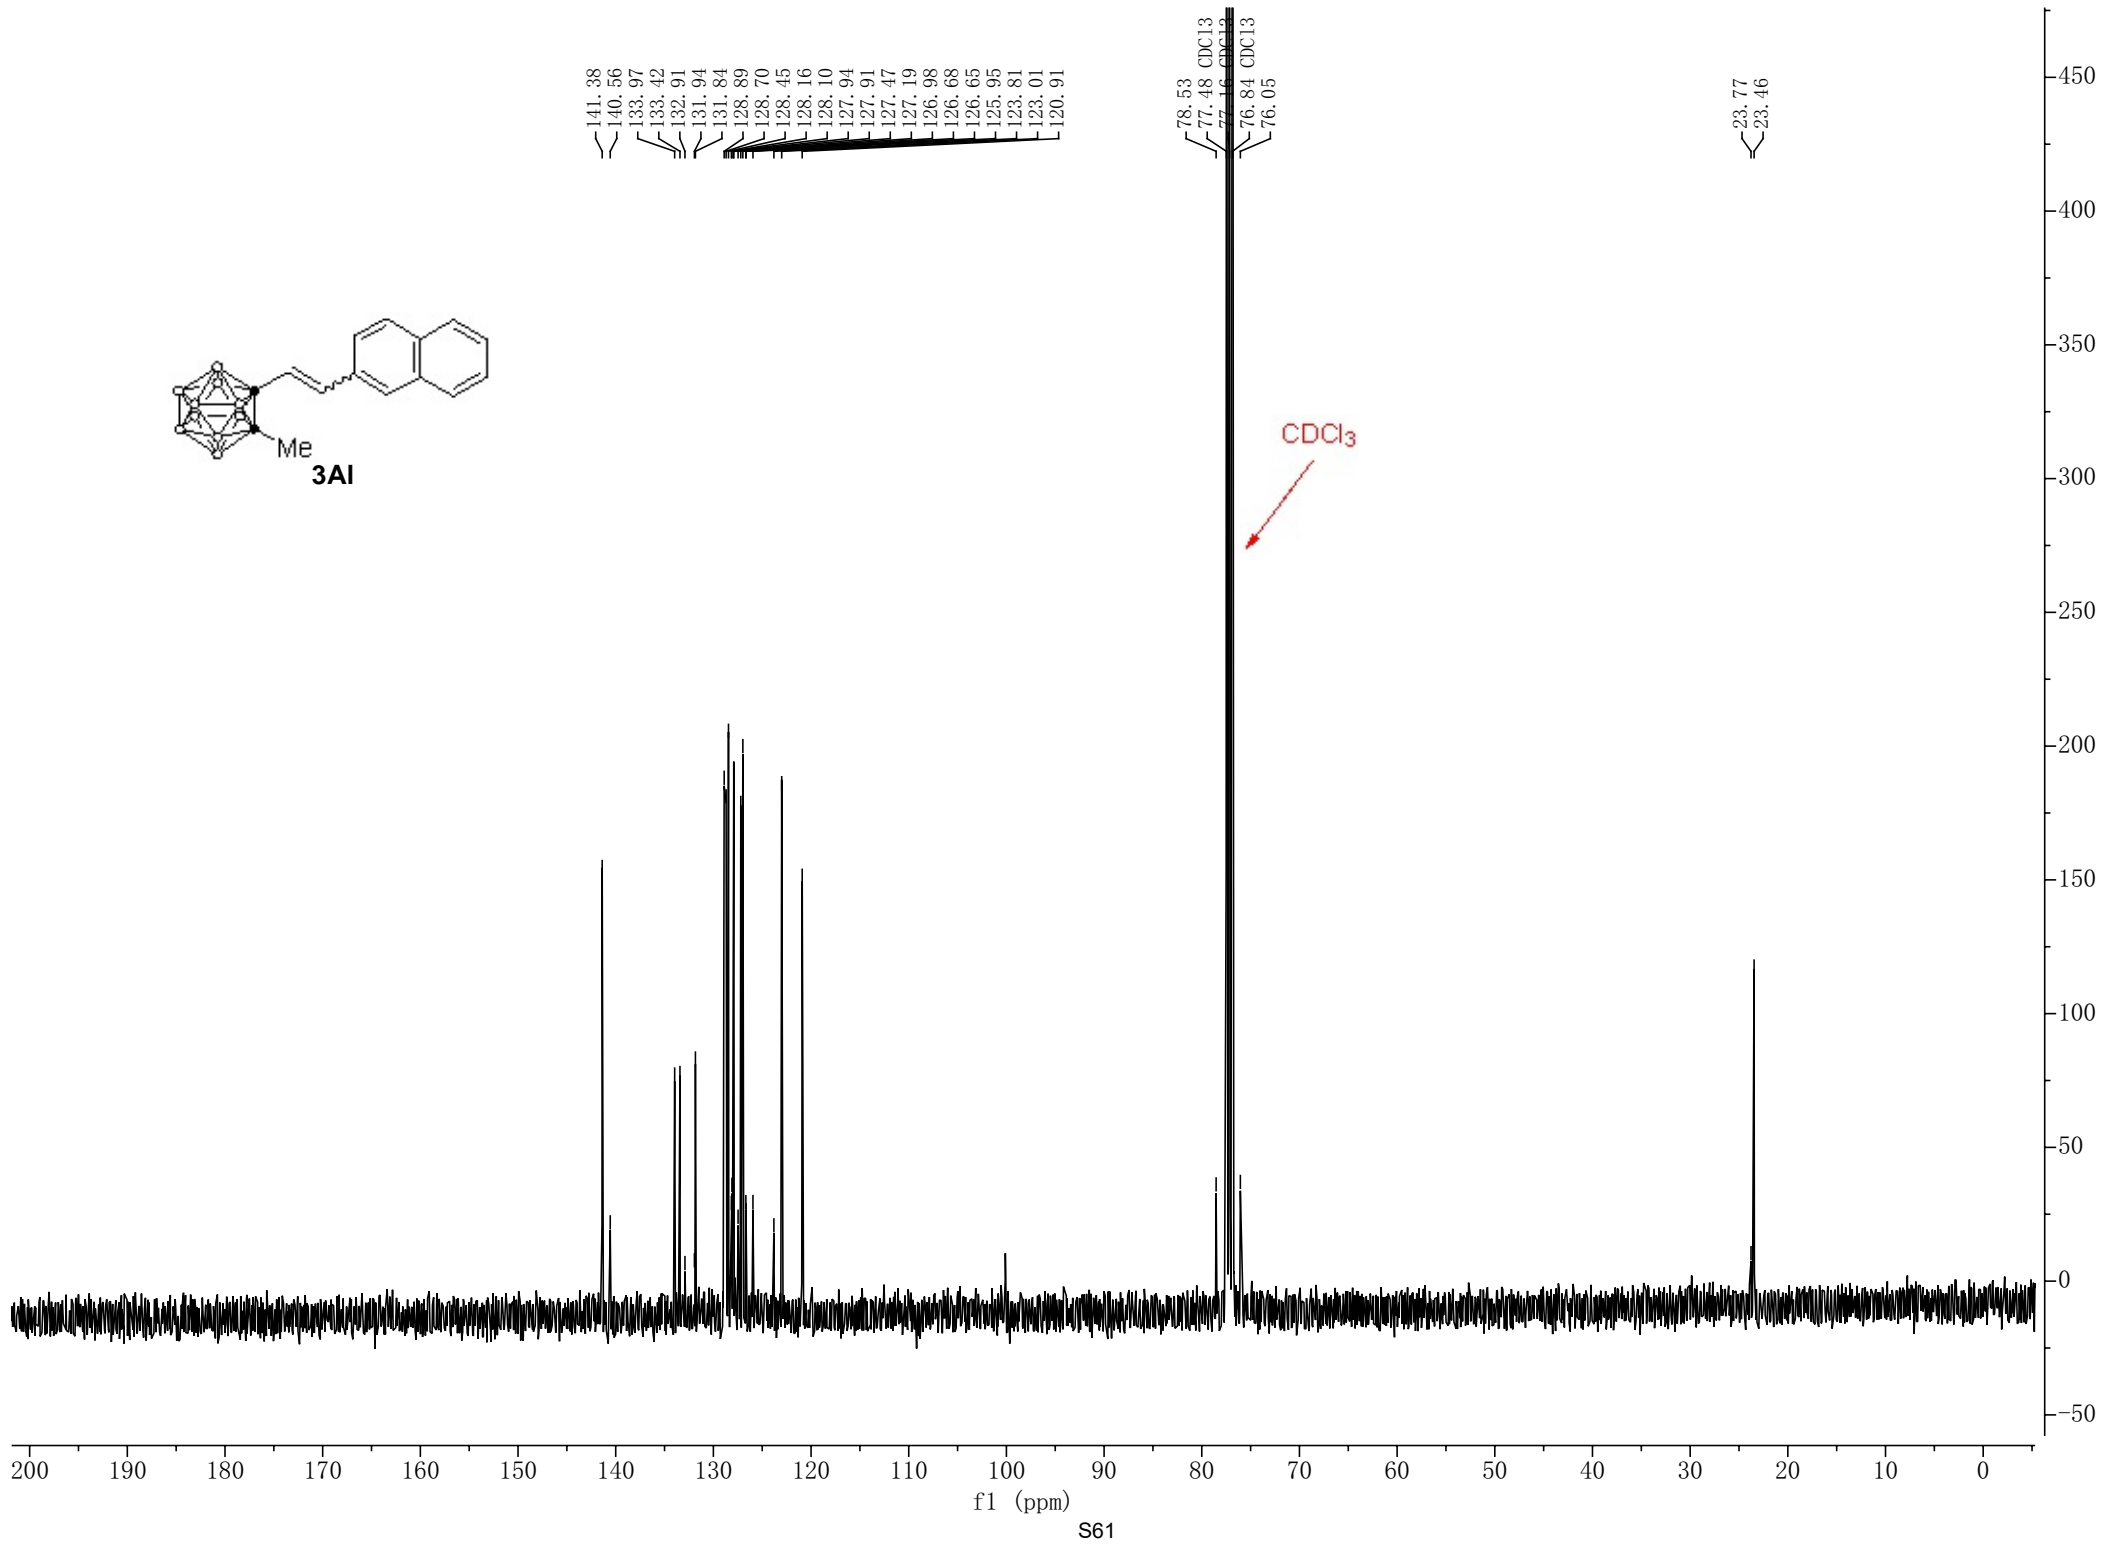

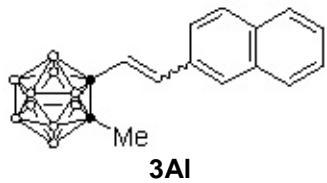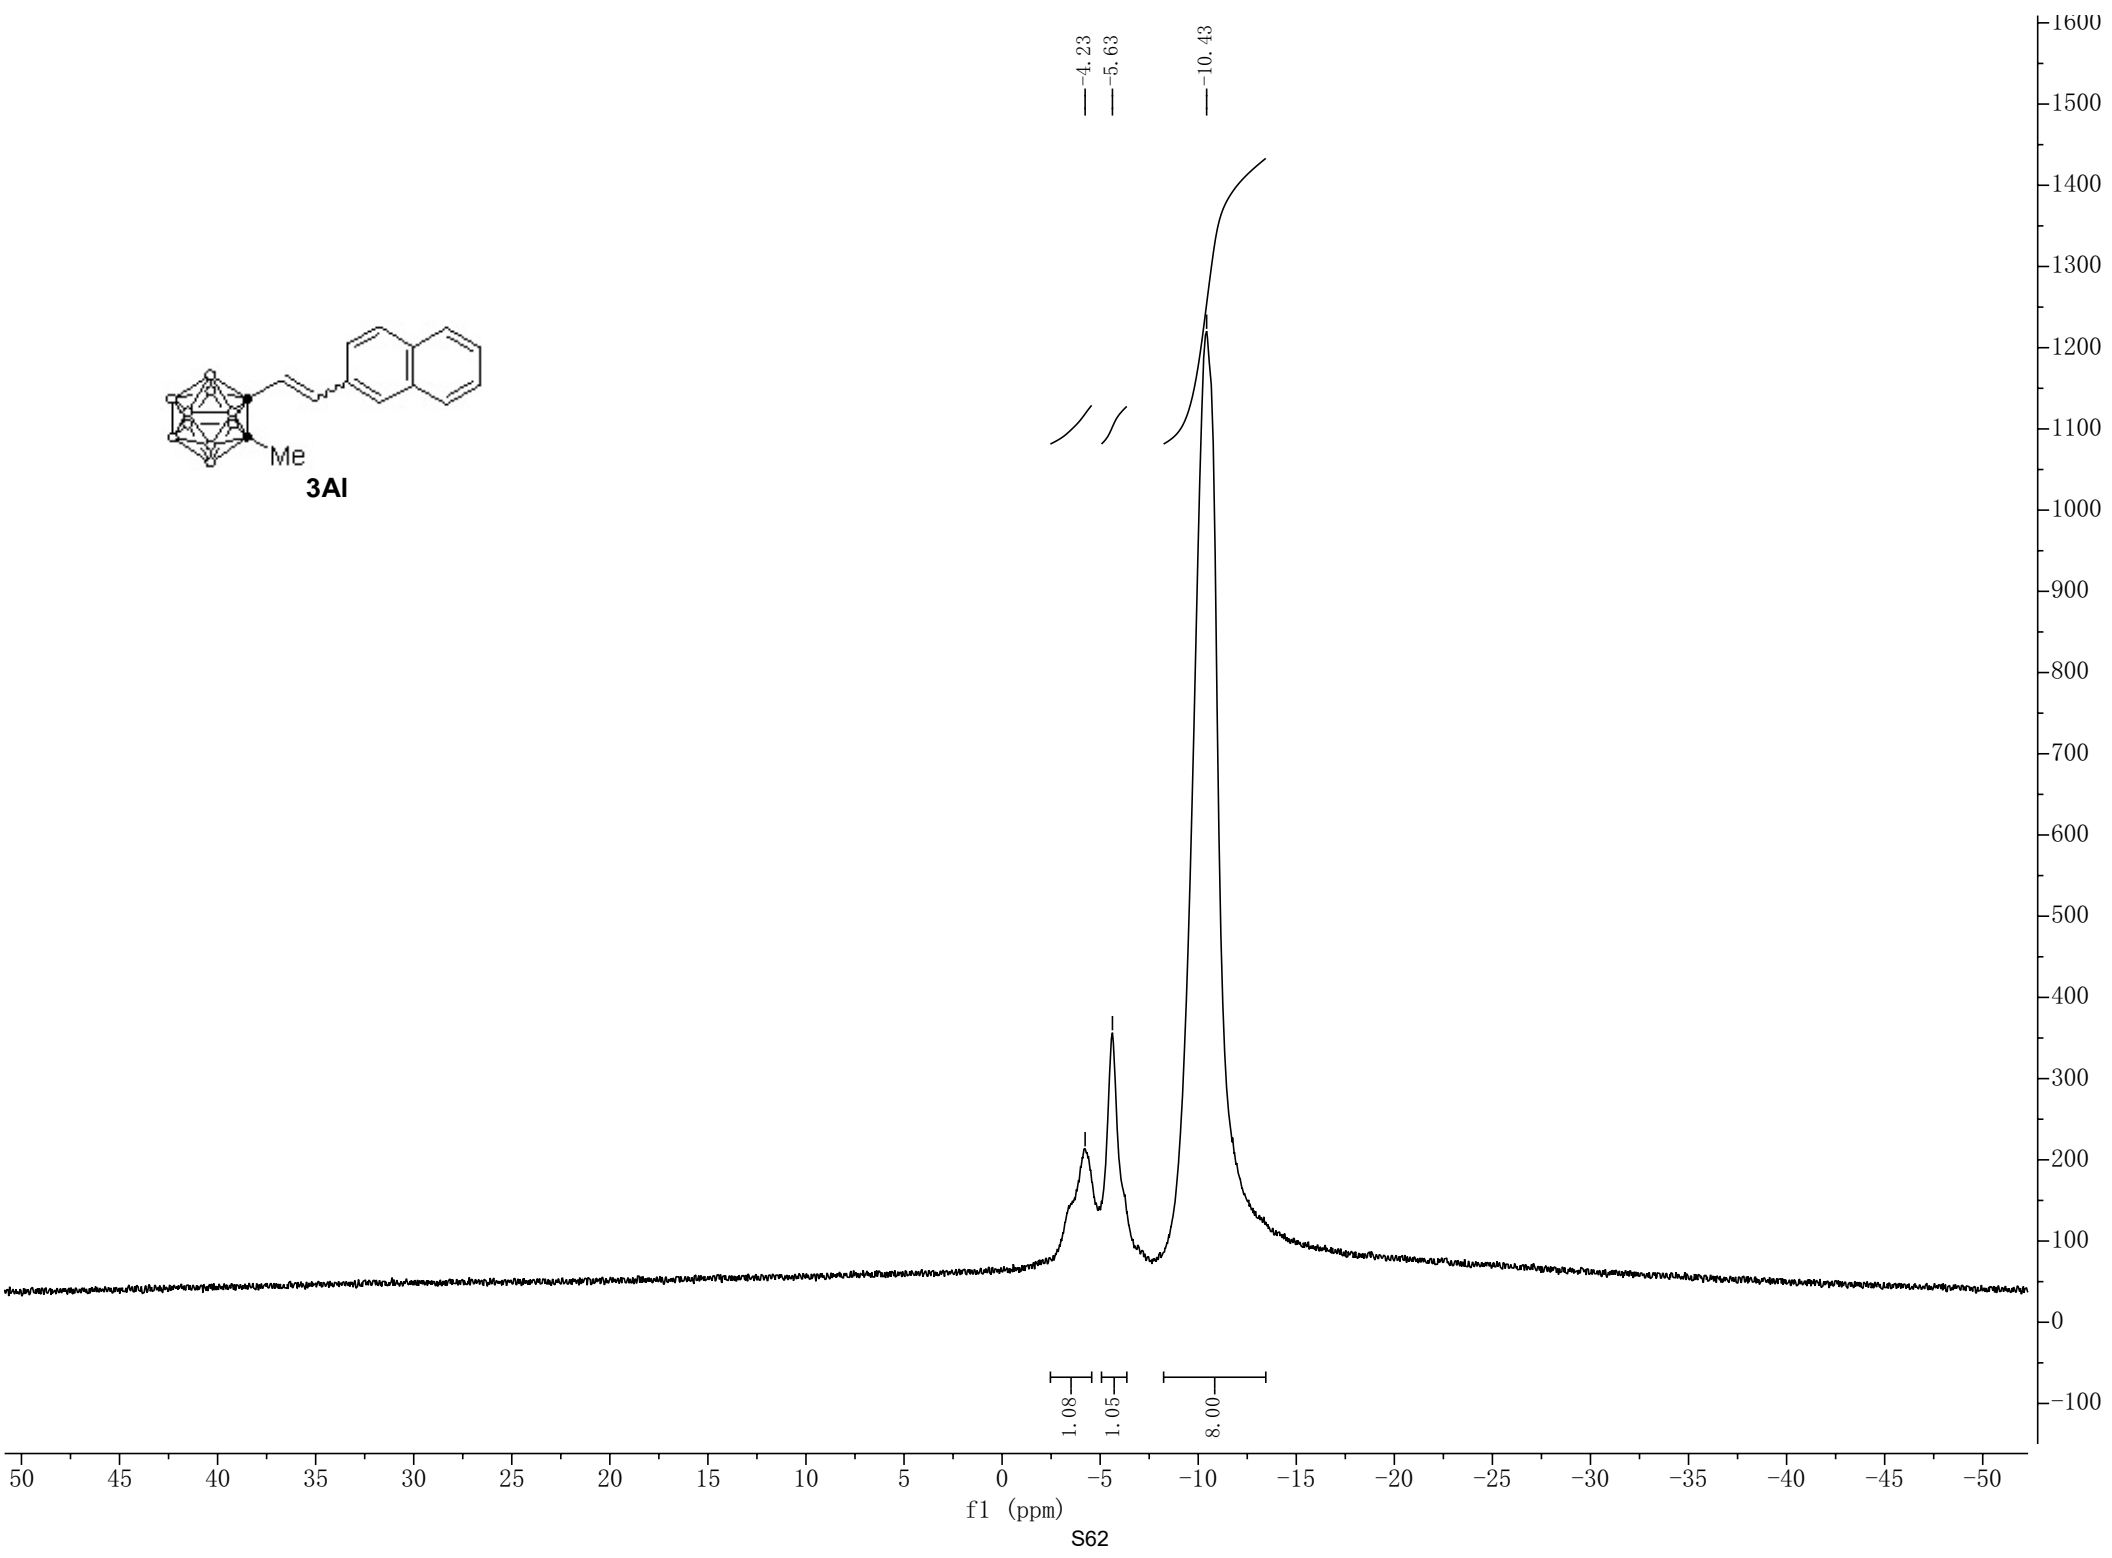

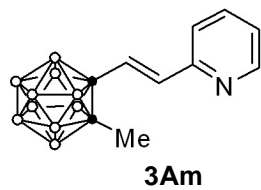

8.59  
8.58  
7.72  
7.72  
7.70  
7.70  
7.68  
7.68  
7.29  
7.27  
7.26  
7.26  
7.25  
7.25  
7.24  
7.23  
7.03  
6.99  
6.95  
6.91

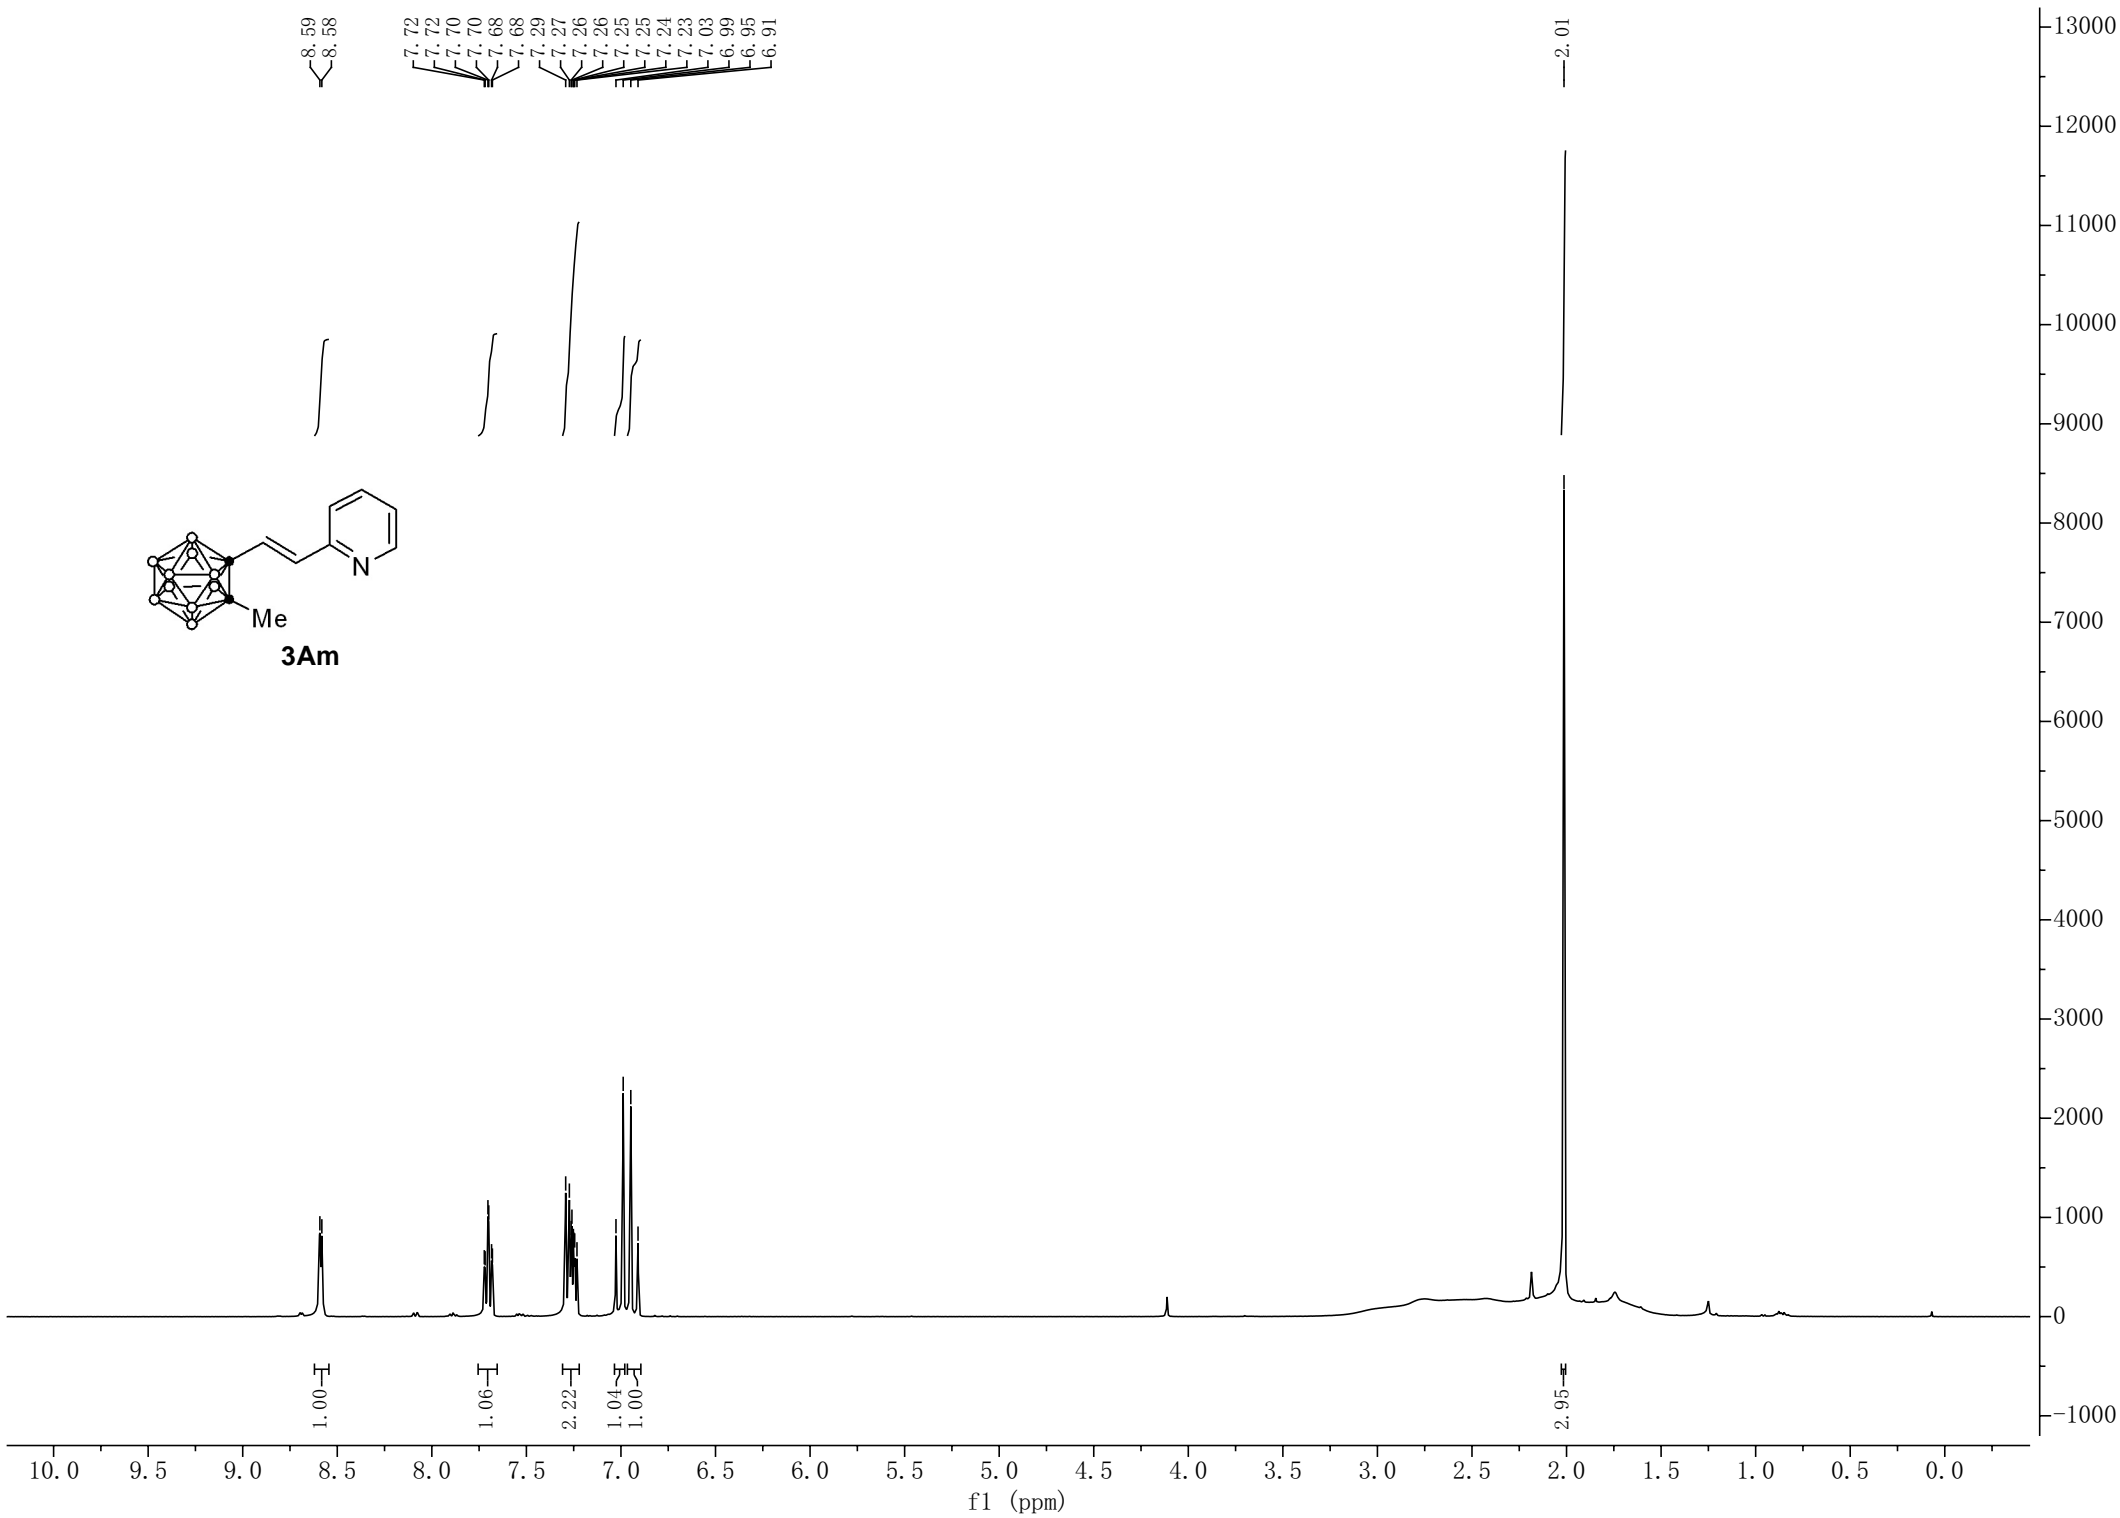

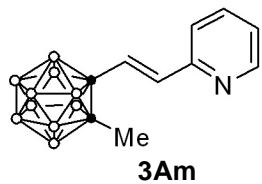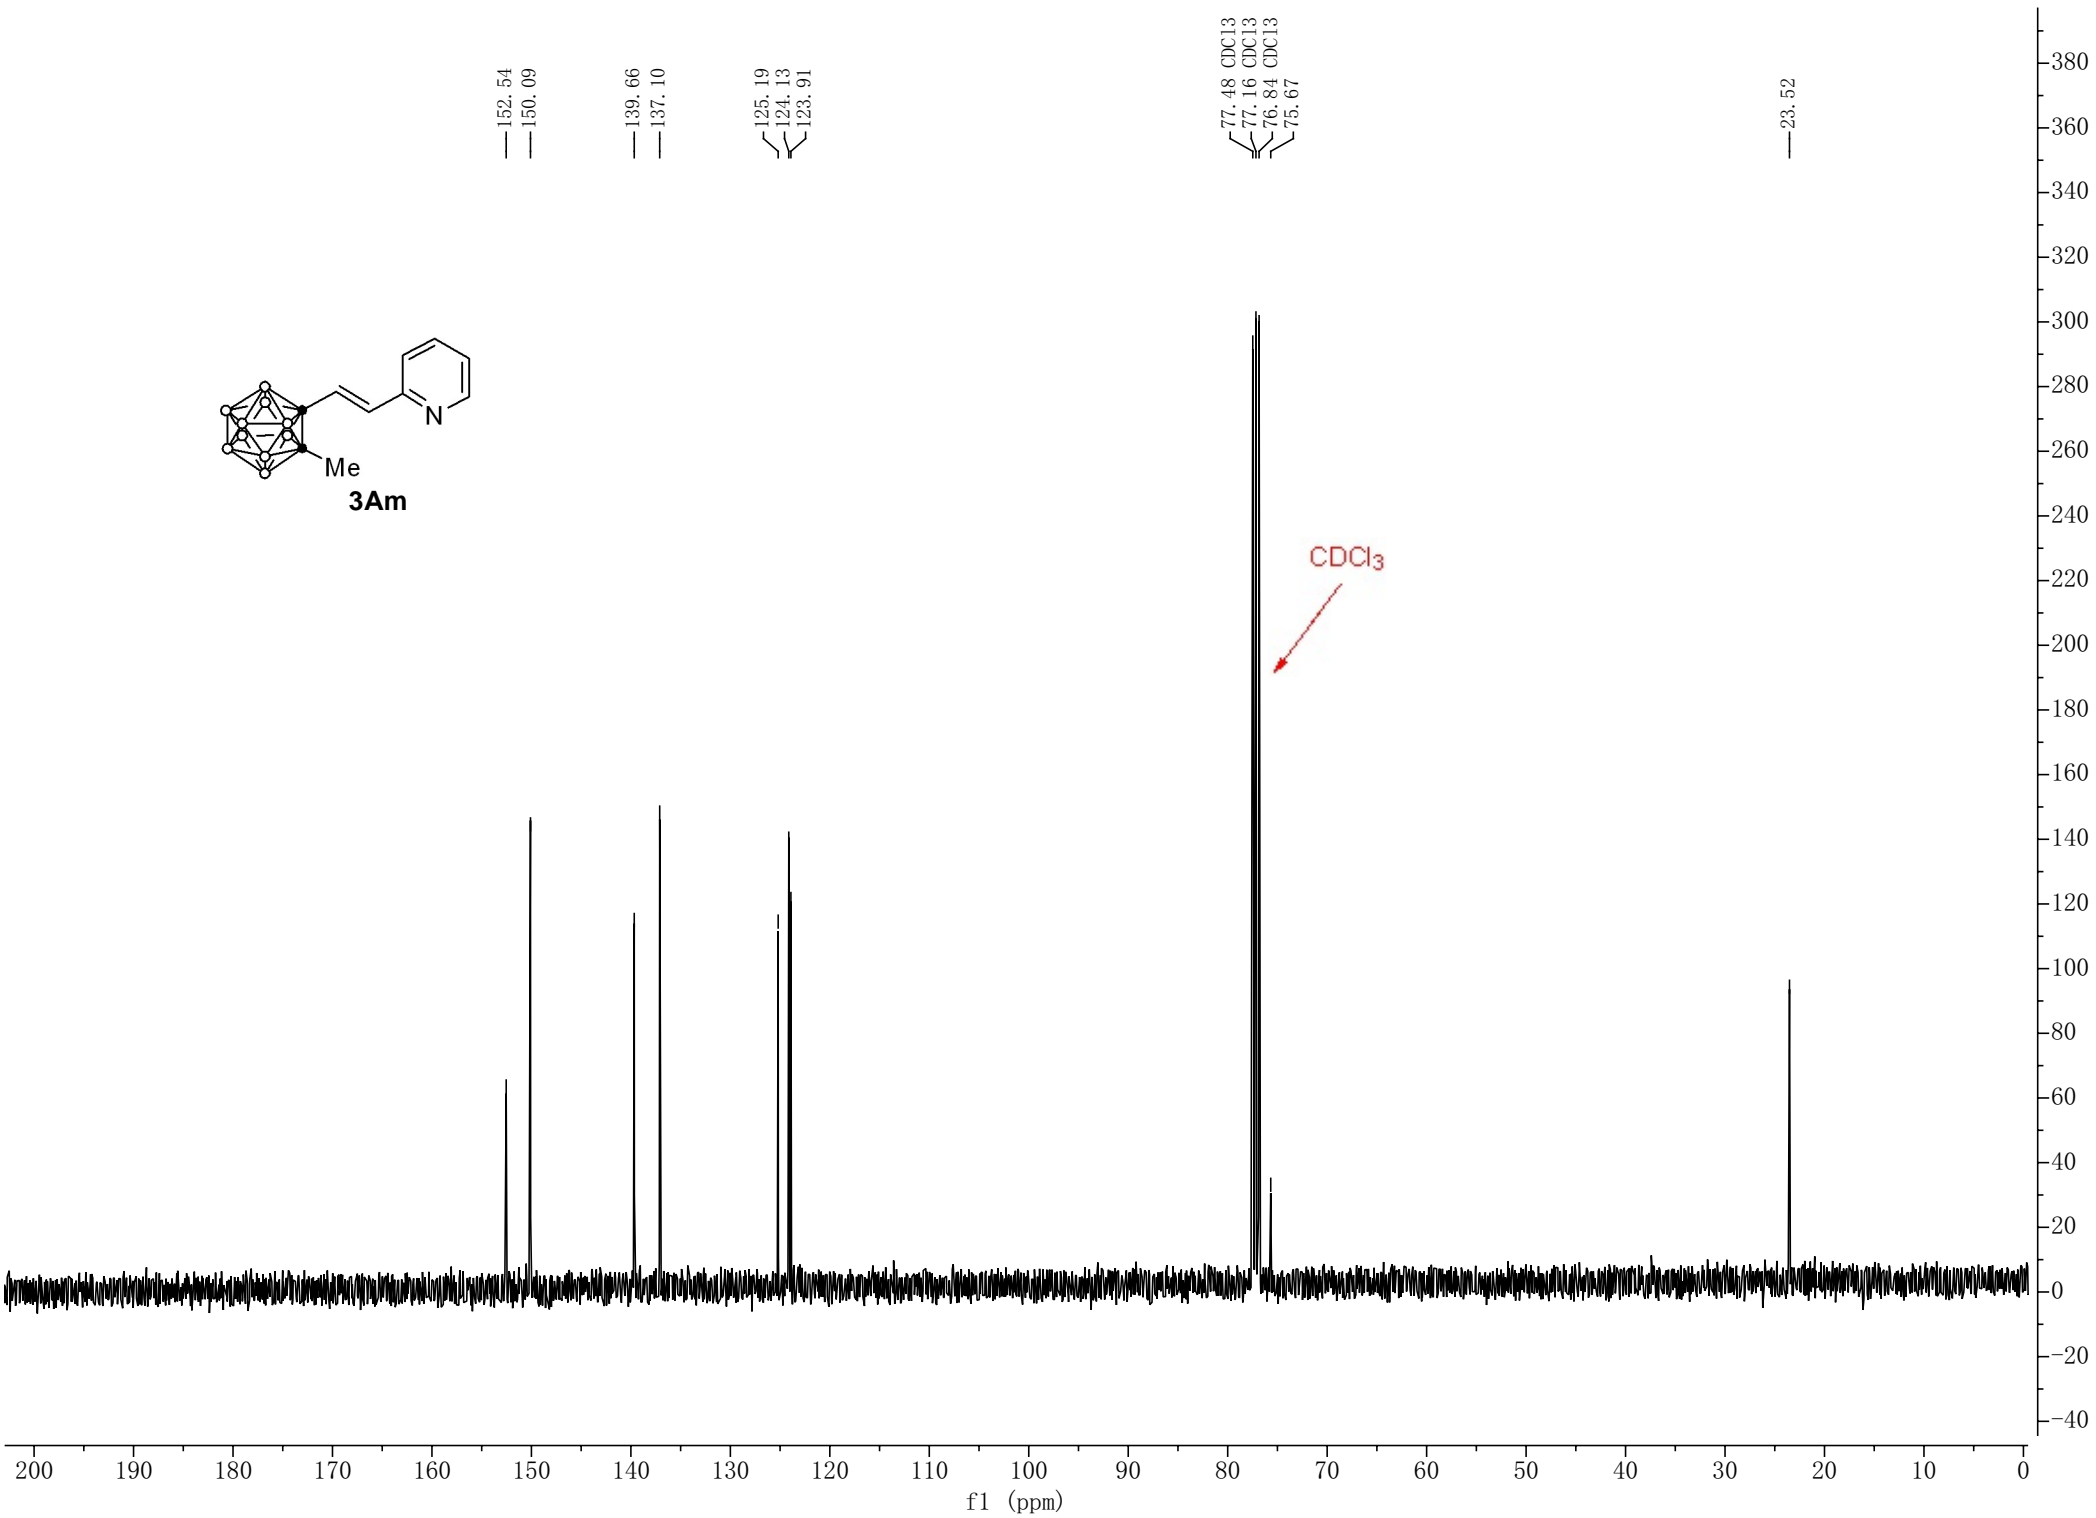



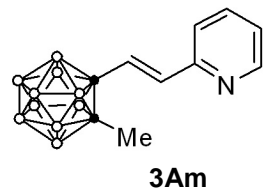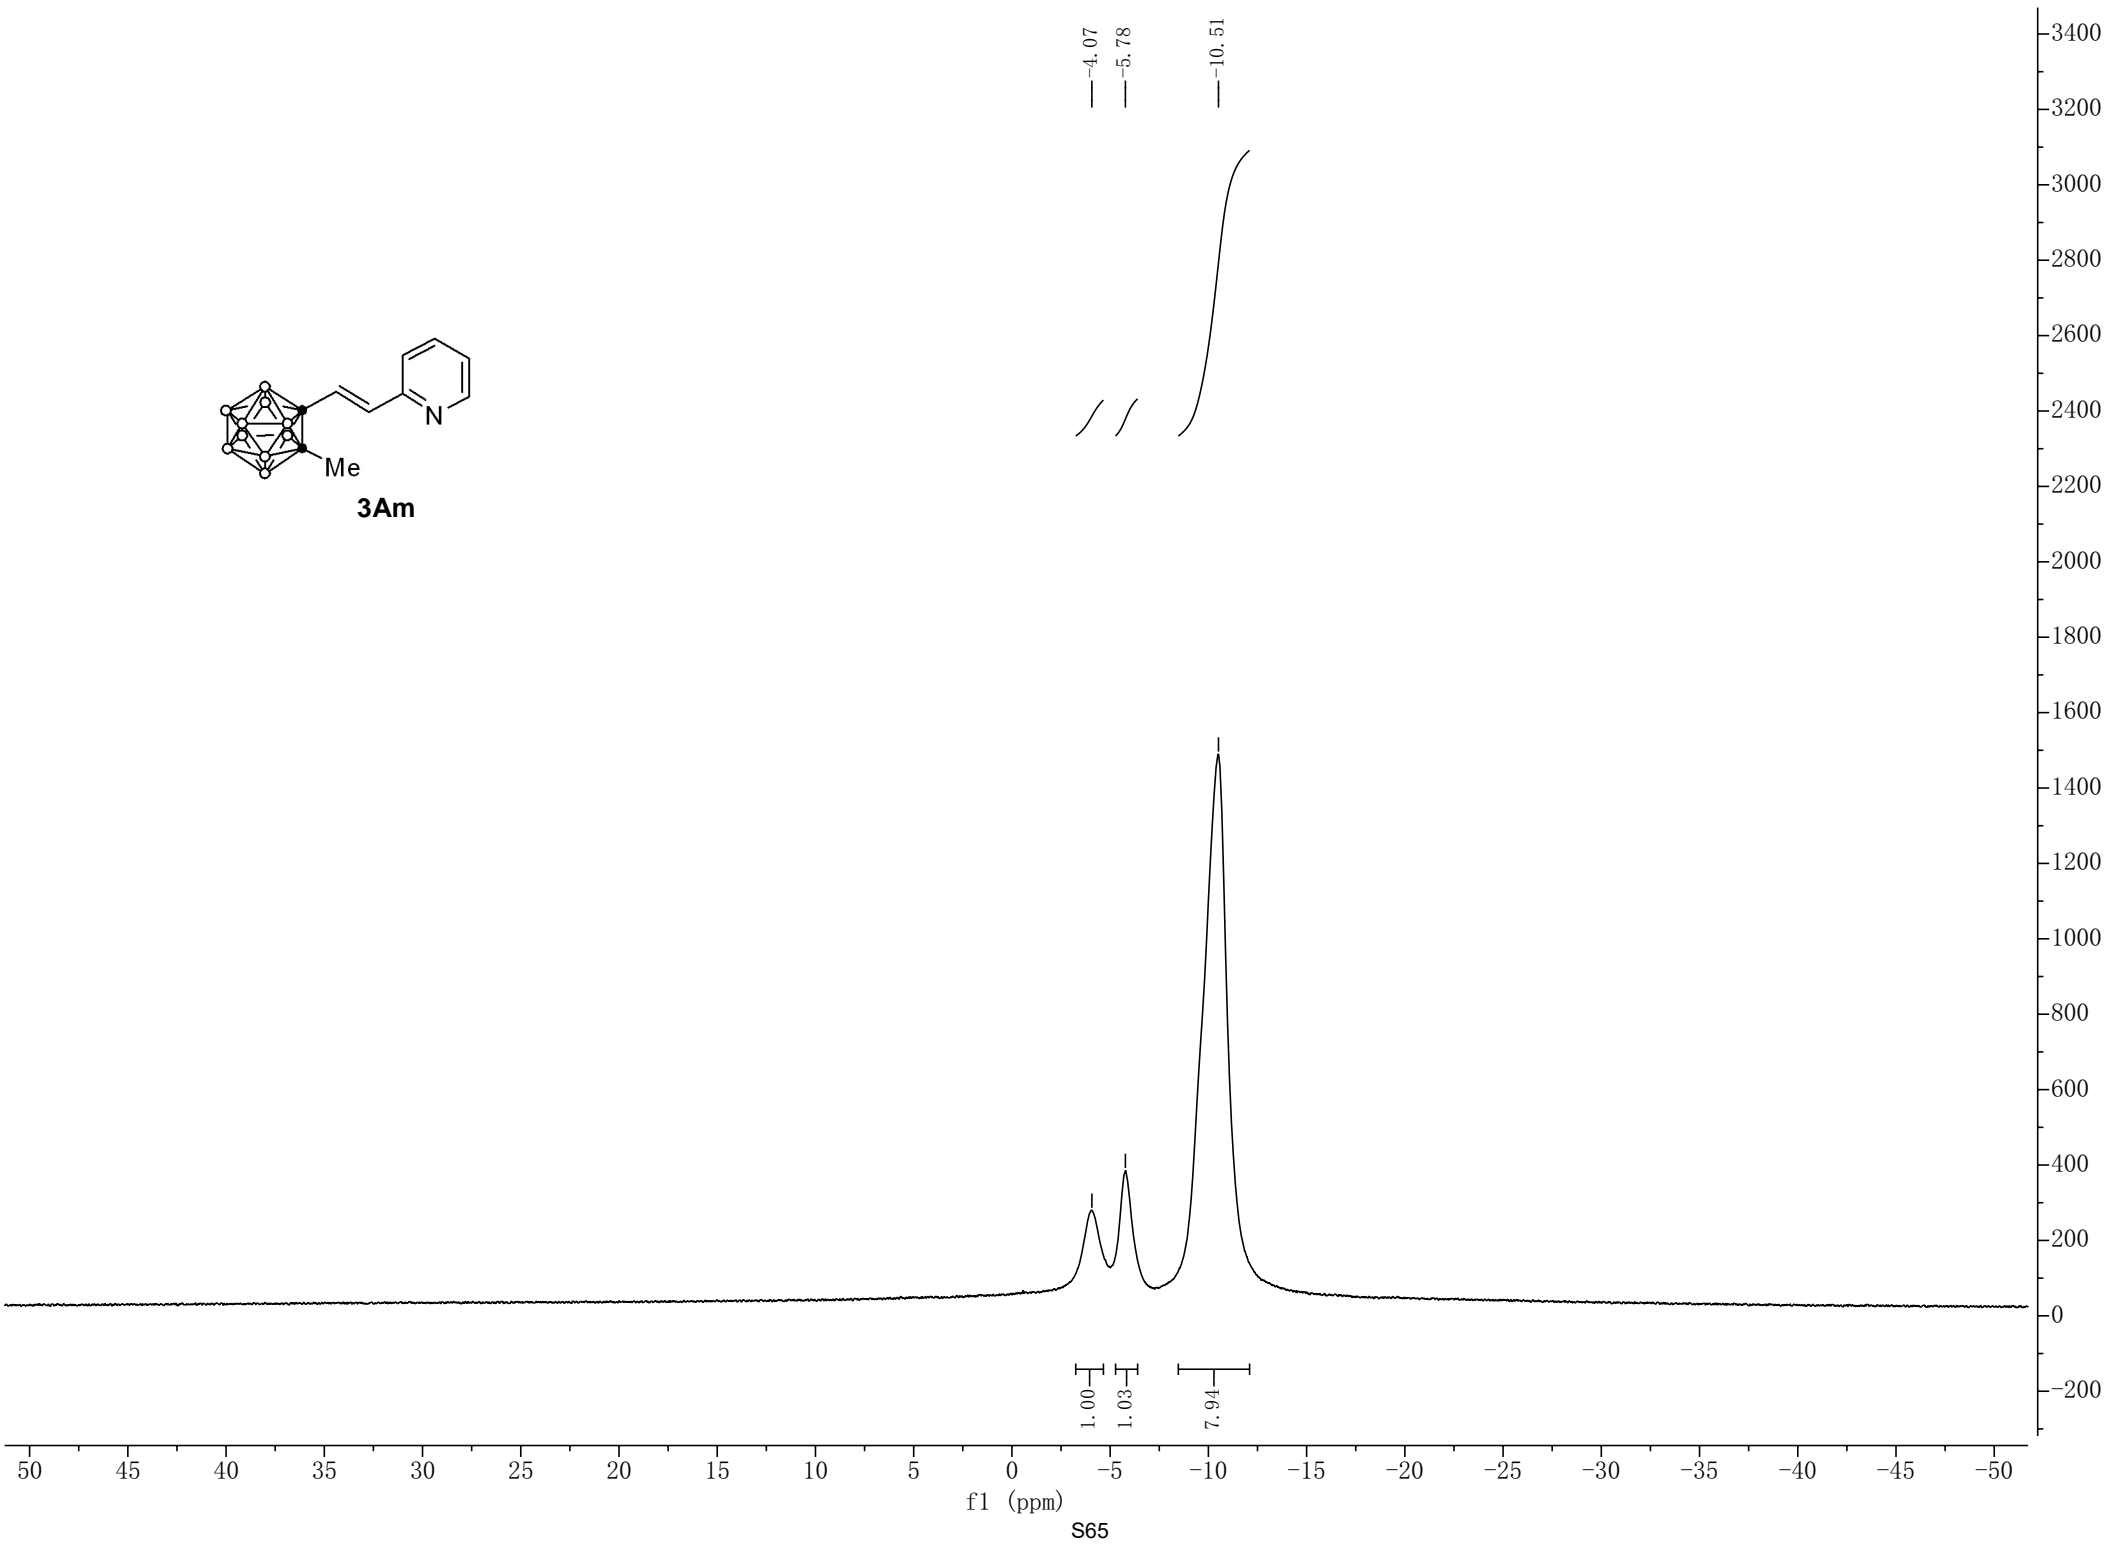

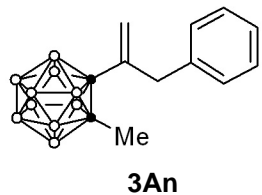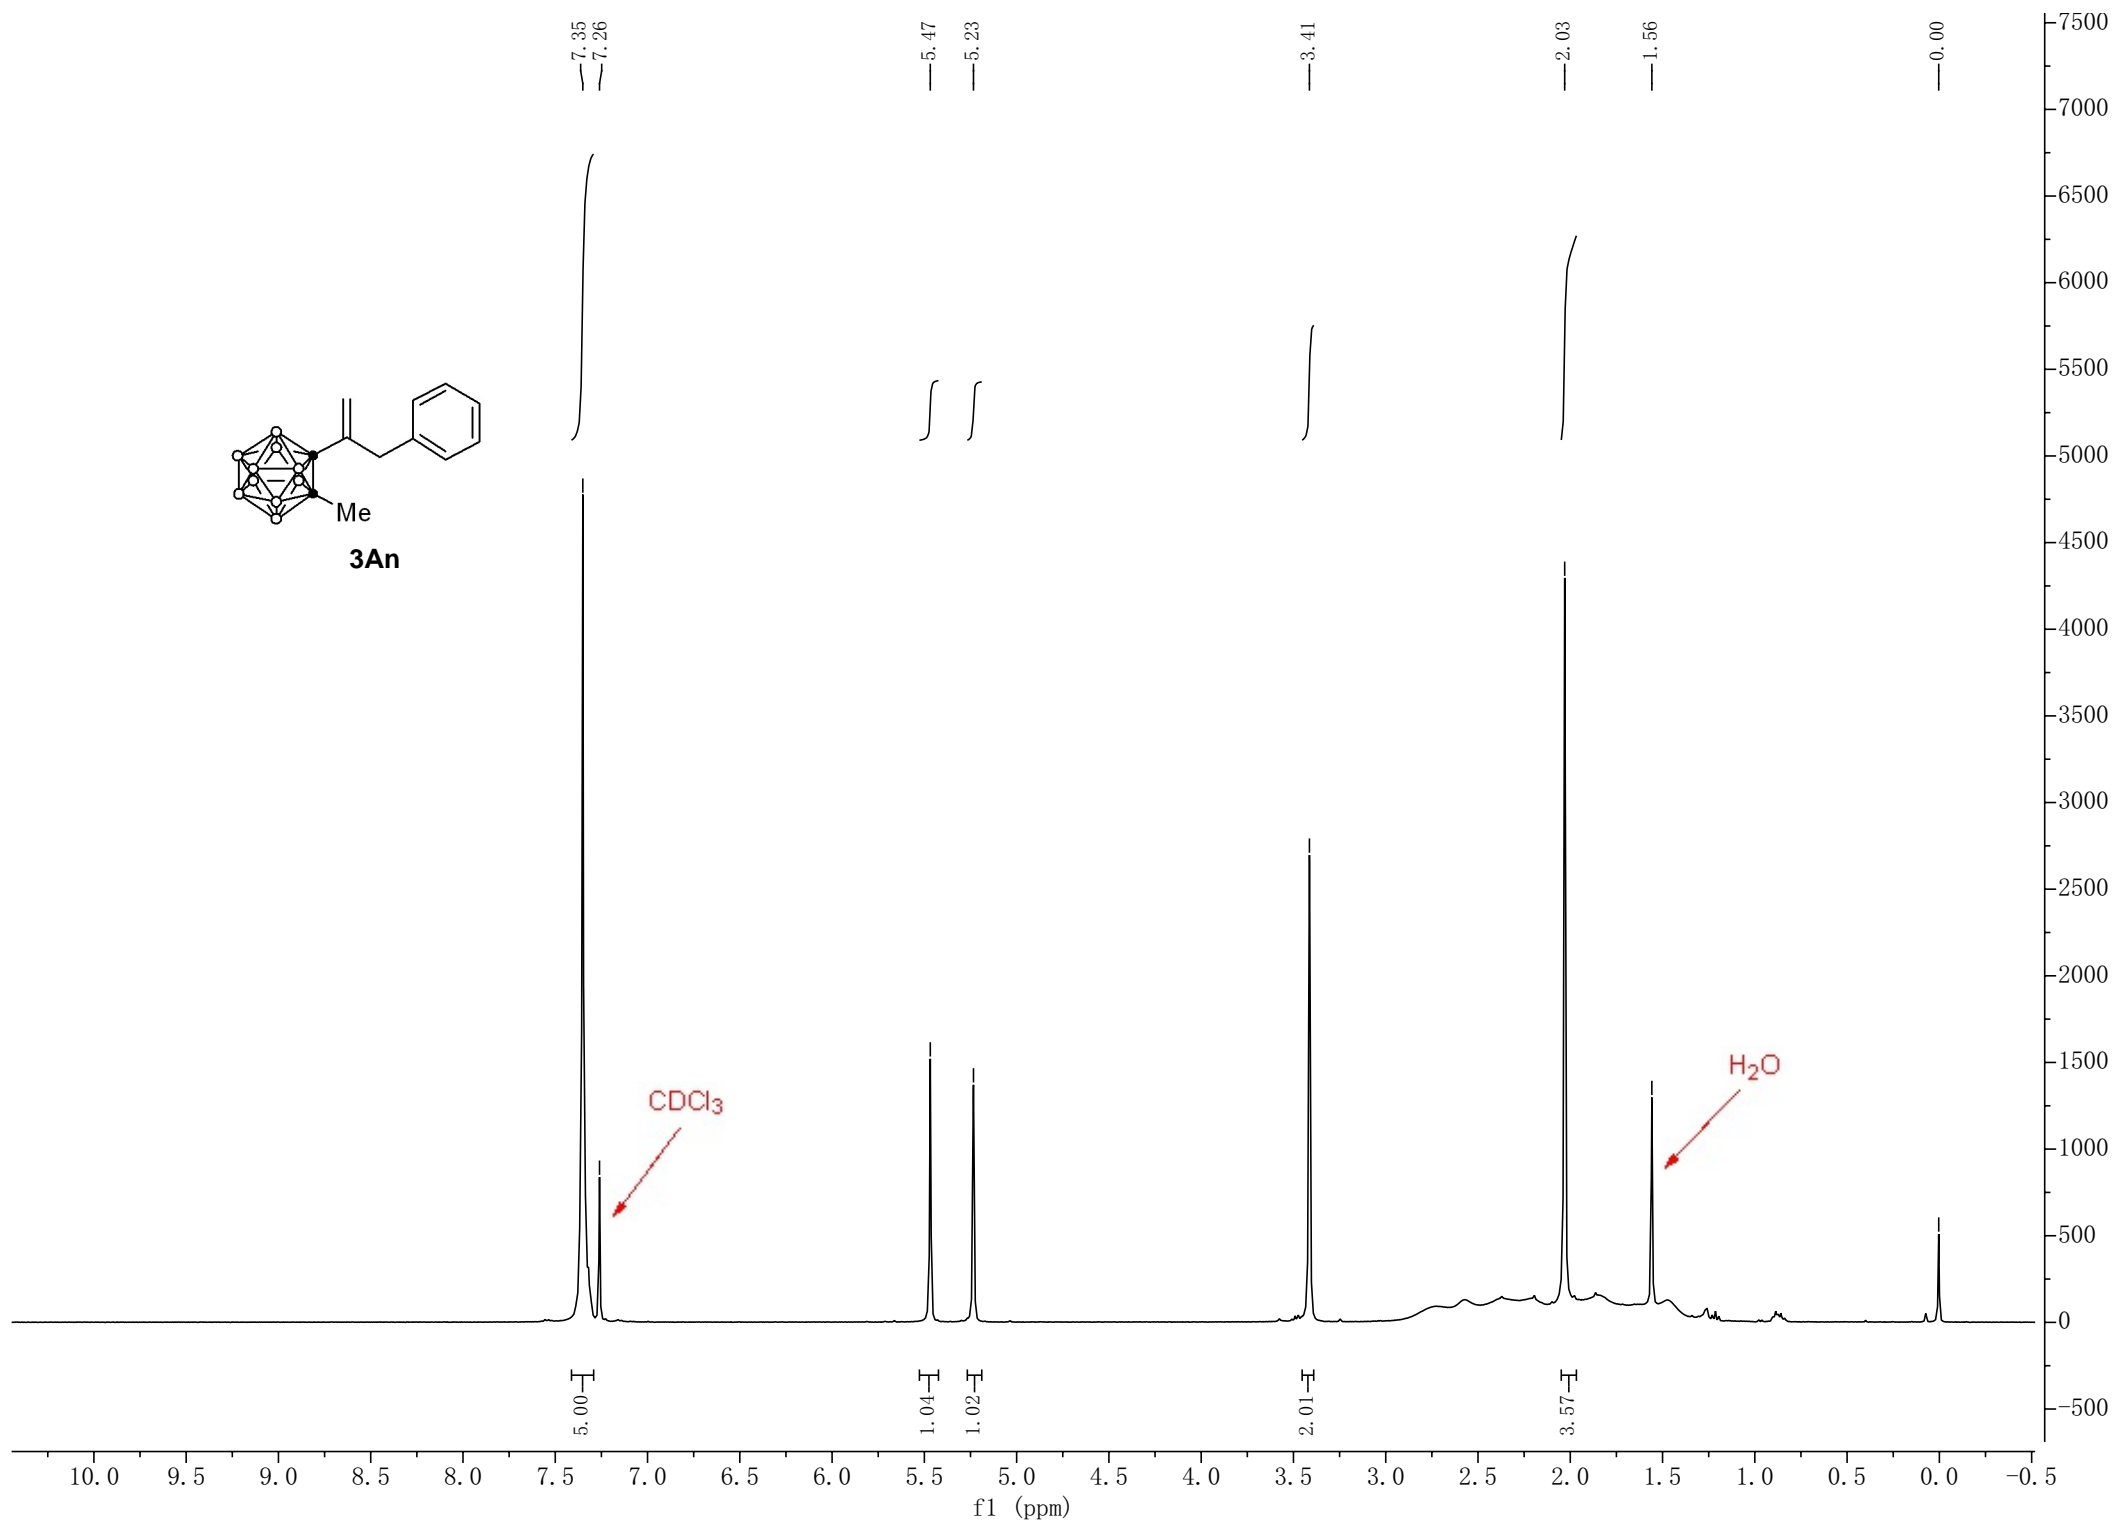

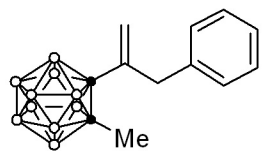

3An

143.51  
140.05

128.67  
128.31  
126.87

120.40

77.48 CDCl<sub>3</sub>  
77.16 CDCl<sub>3</sub>  
76.84 CDCl<sub>3</sub>  
76.74  
75.11

40.37

23.77

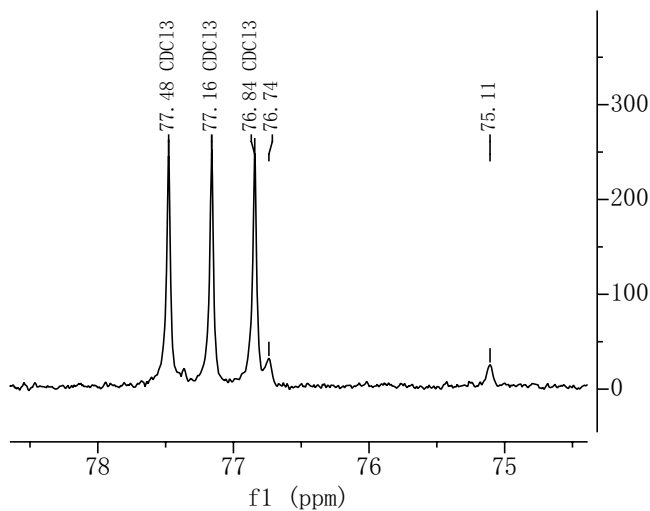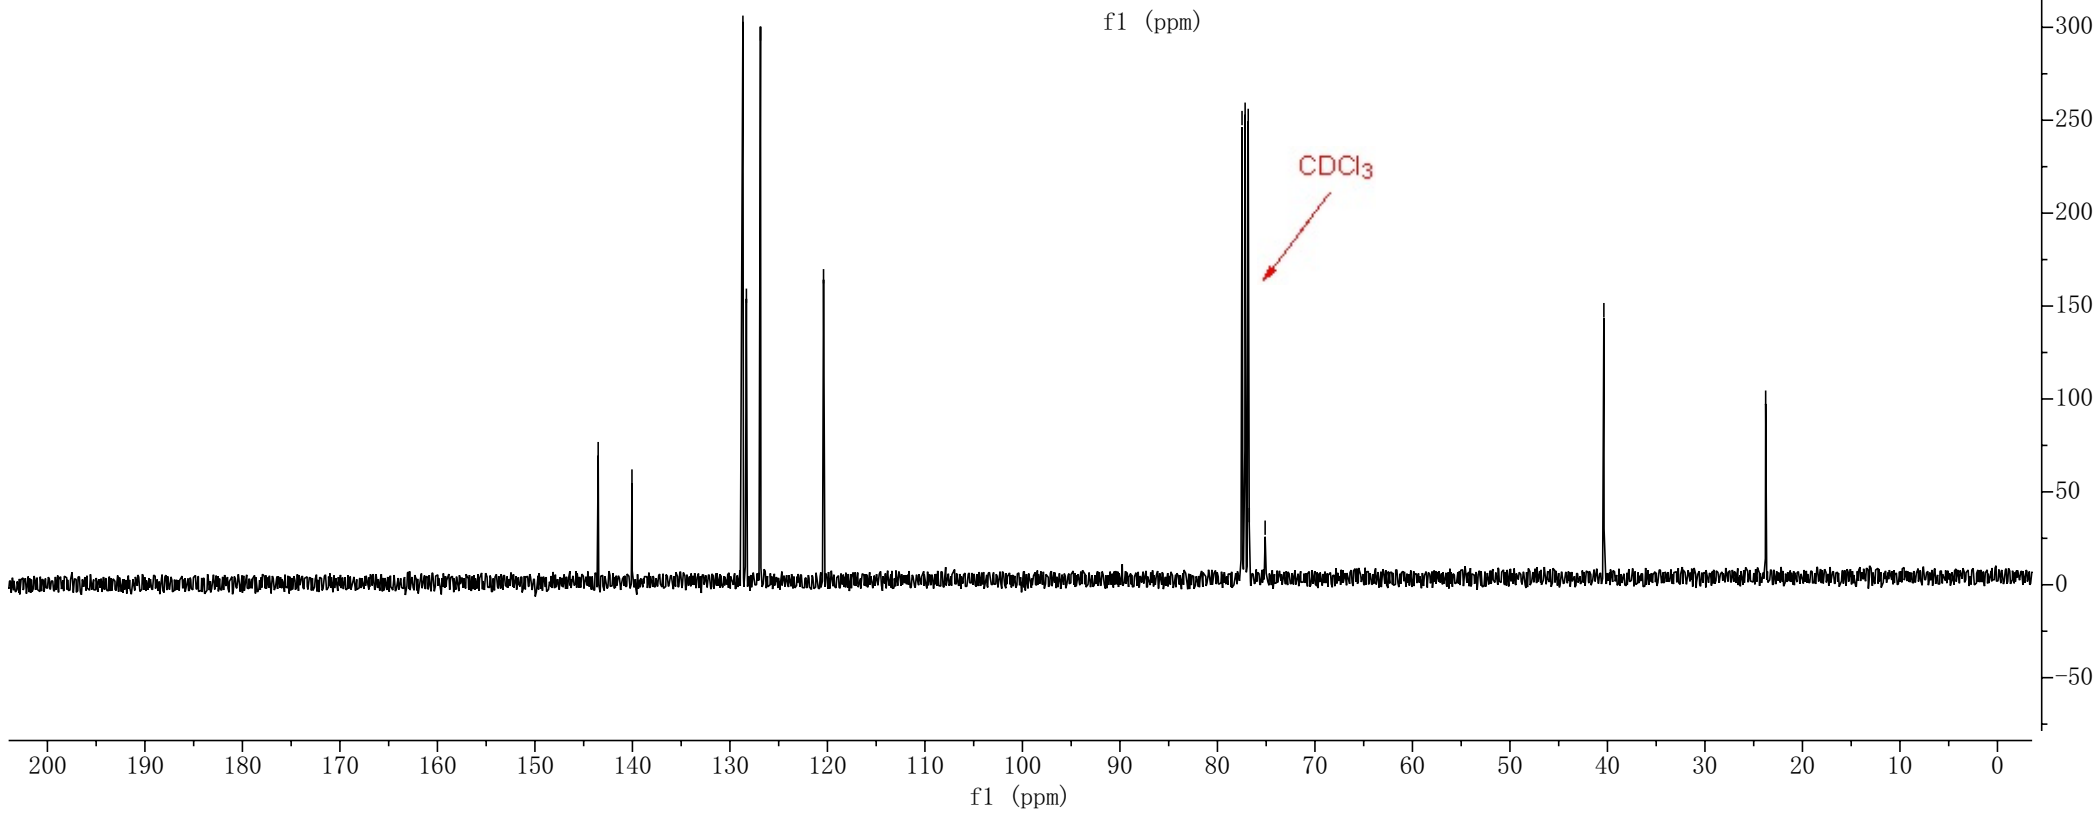

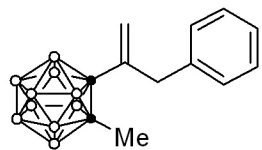

**3An**

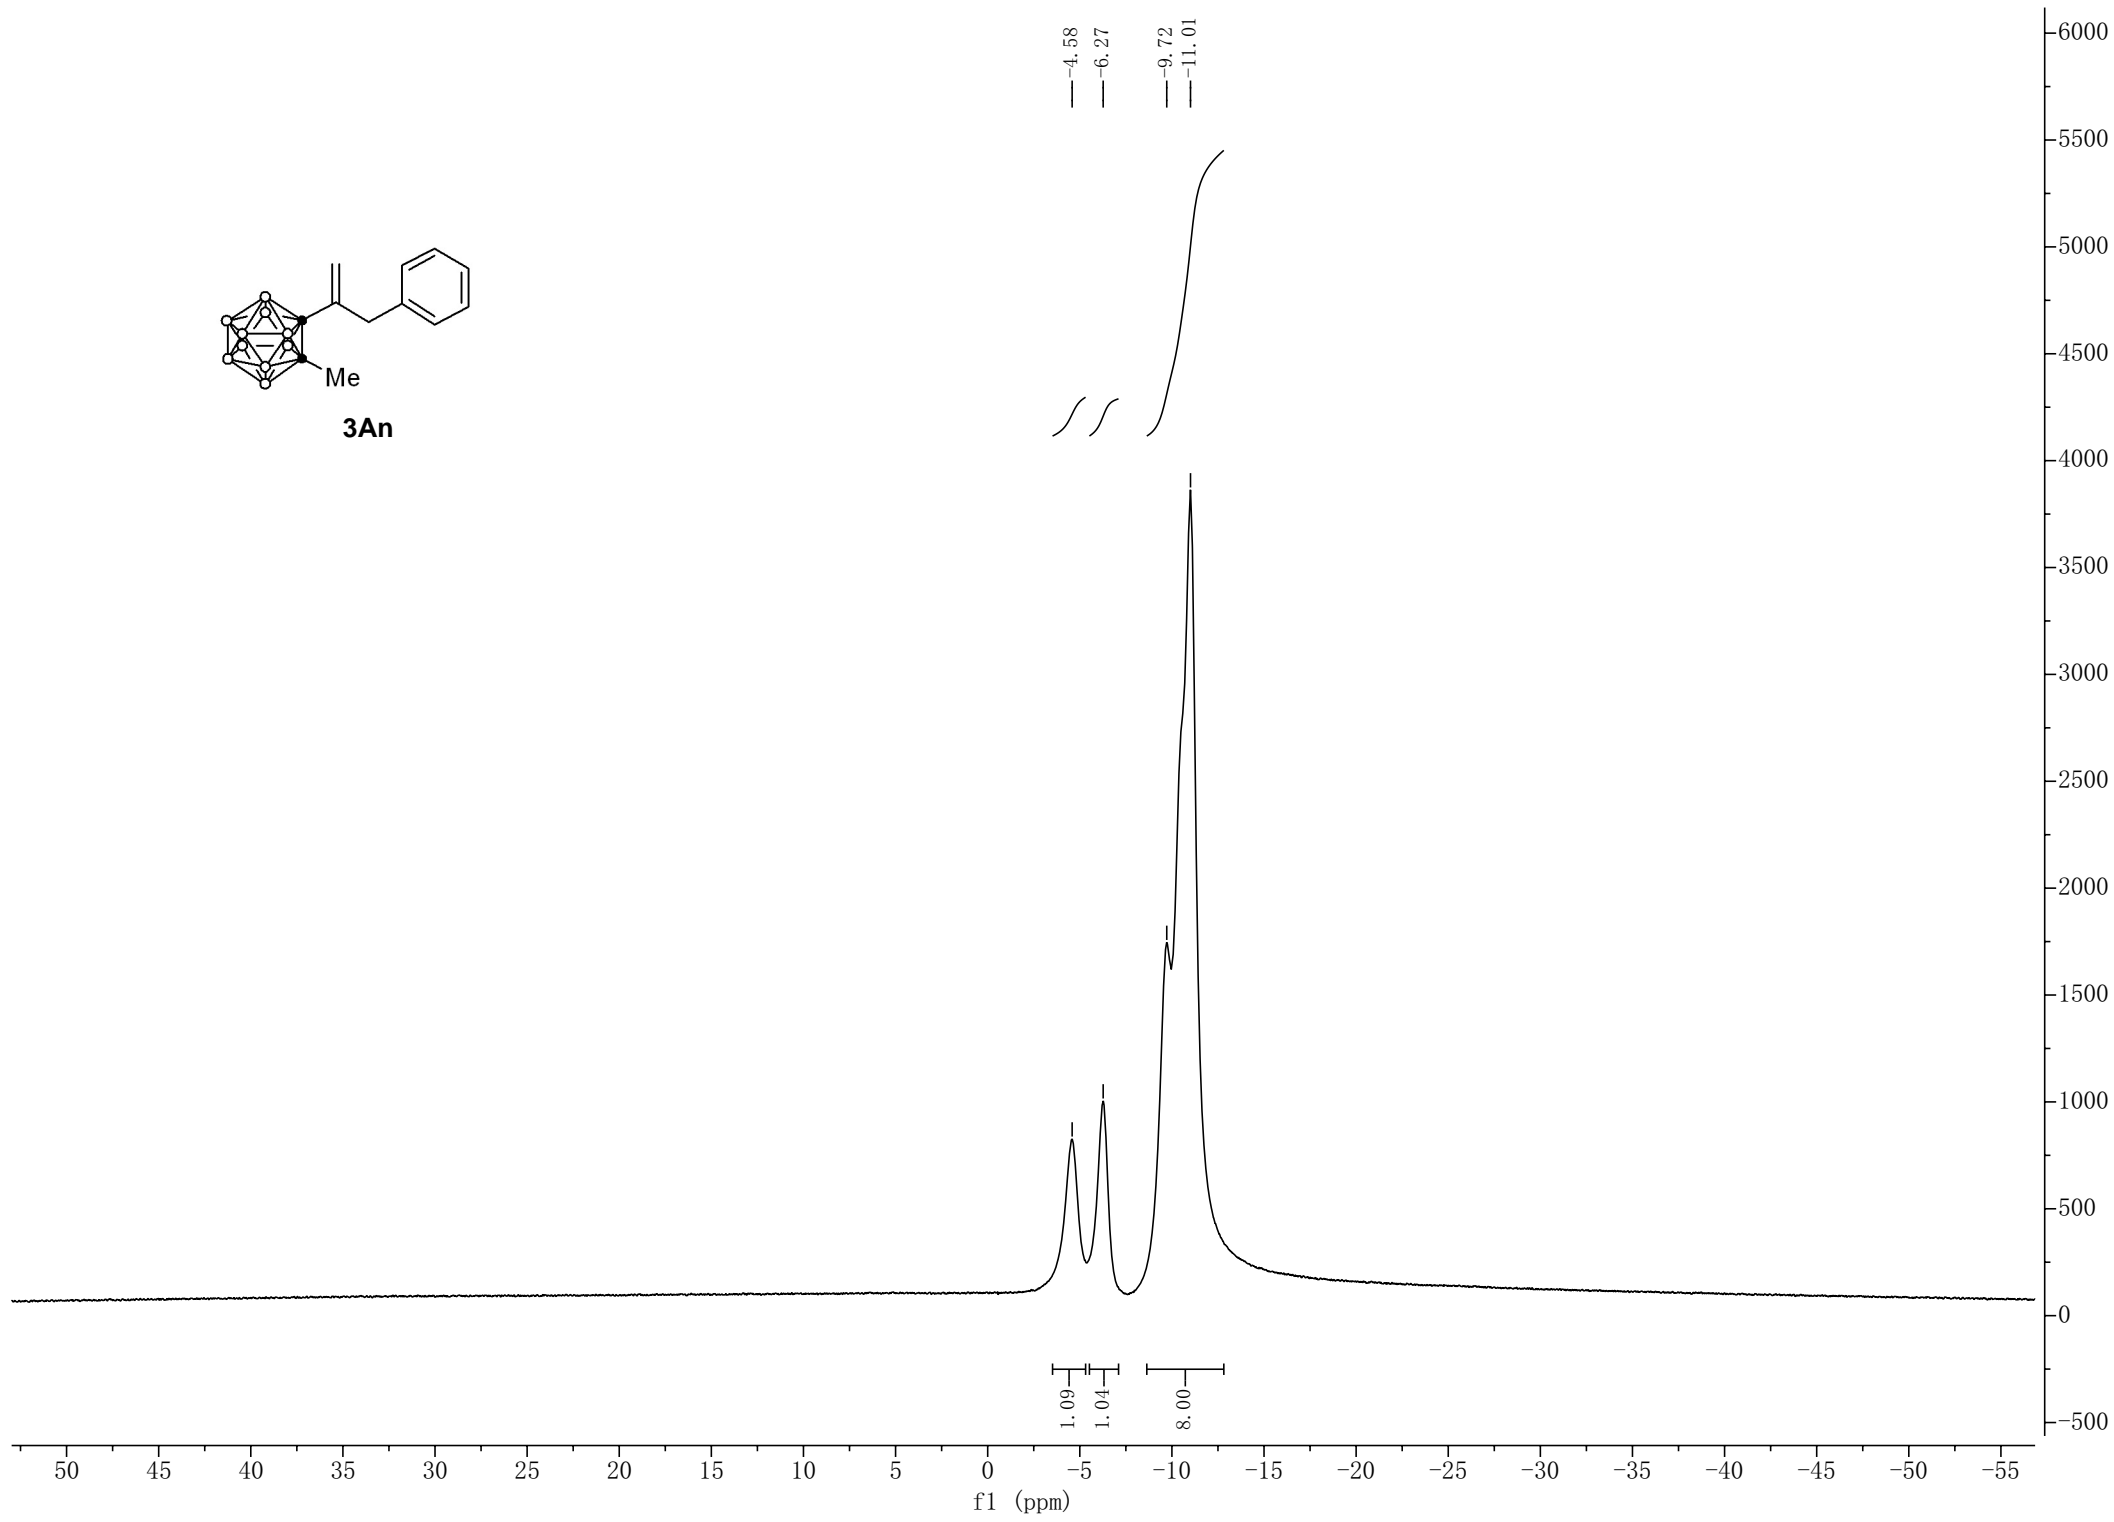

1.09  
1.04  
8.00

-4.58  
-6.27  
-9.72  
-11.01

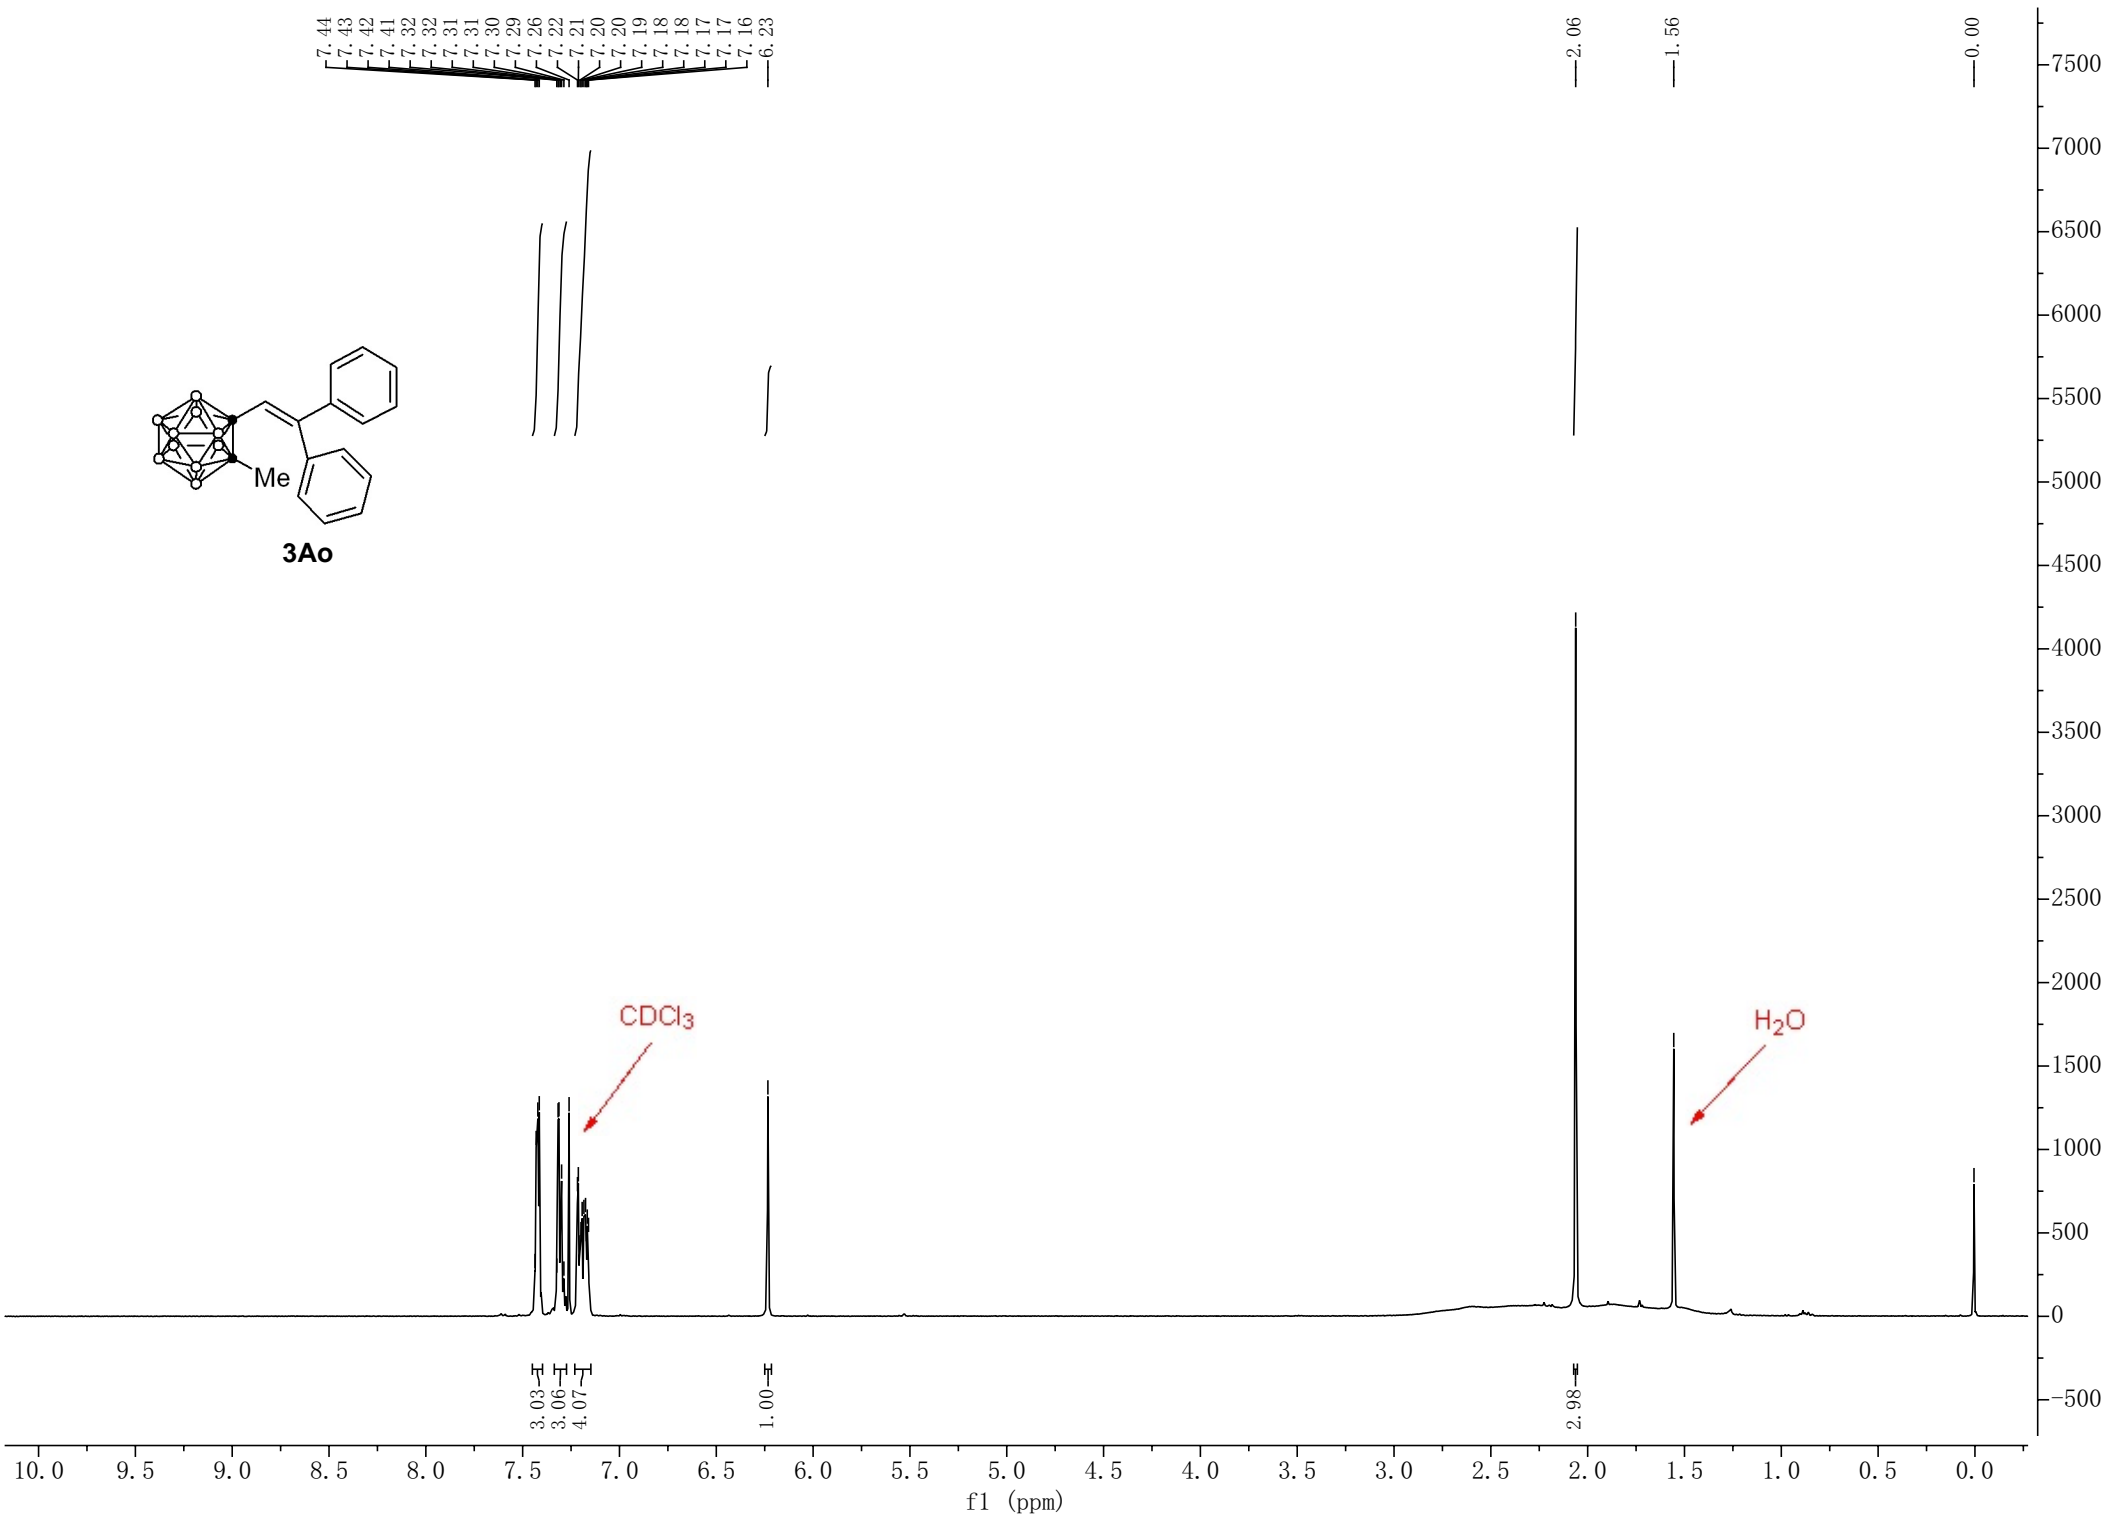

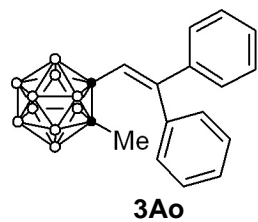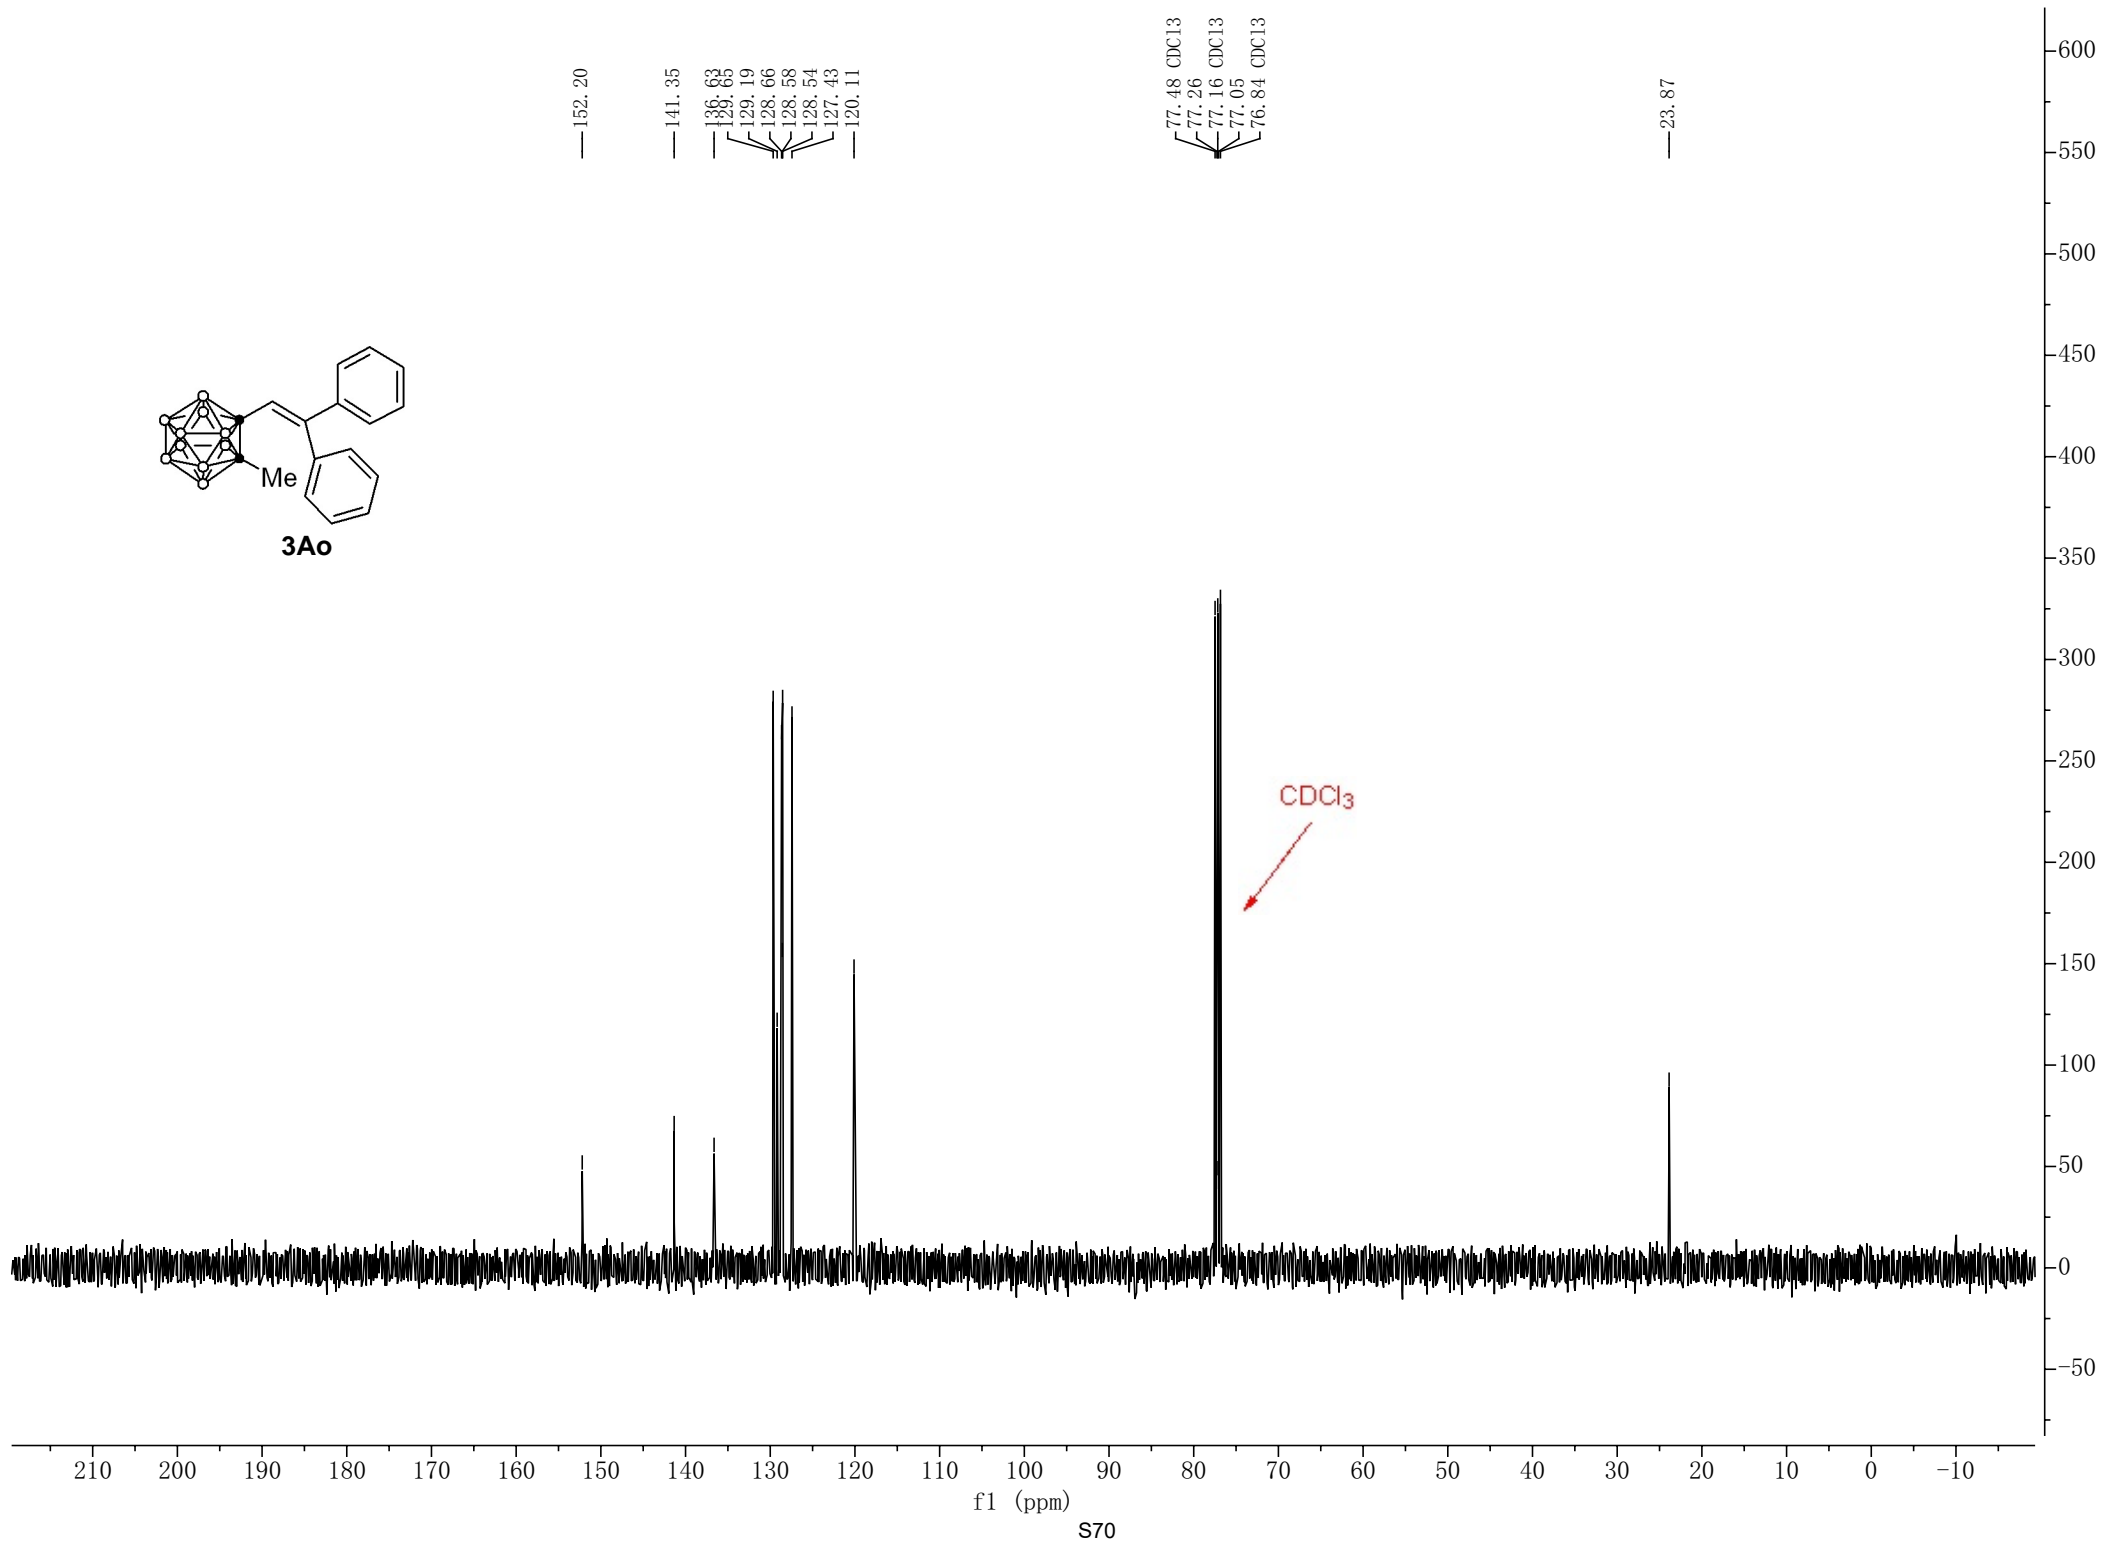

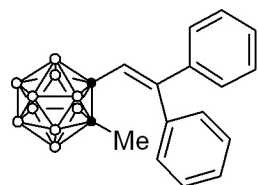

**3Ao**

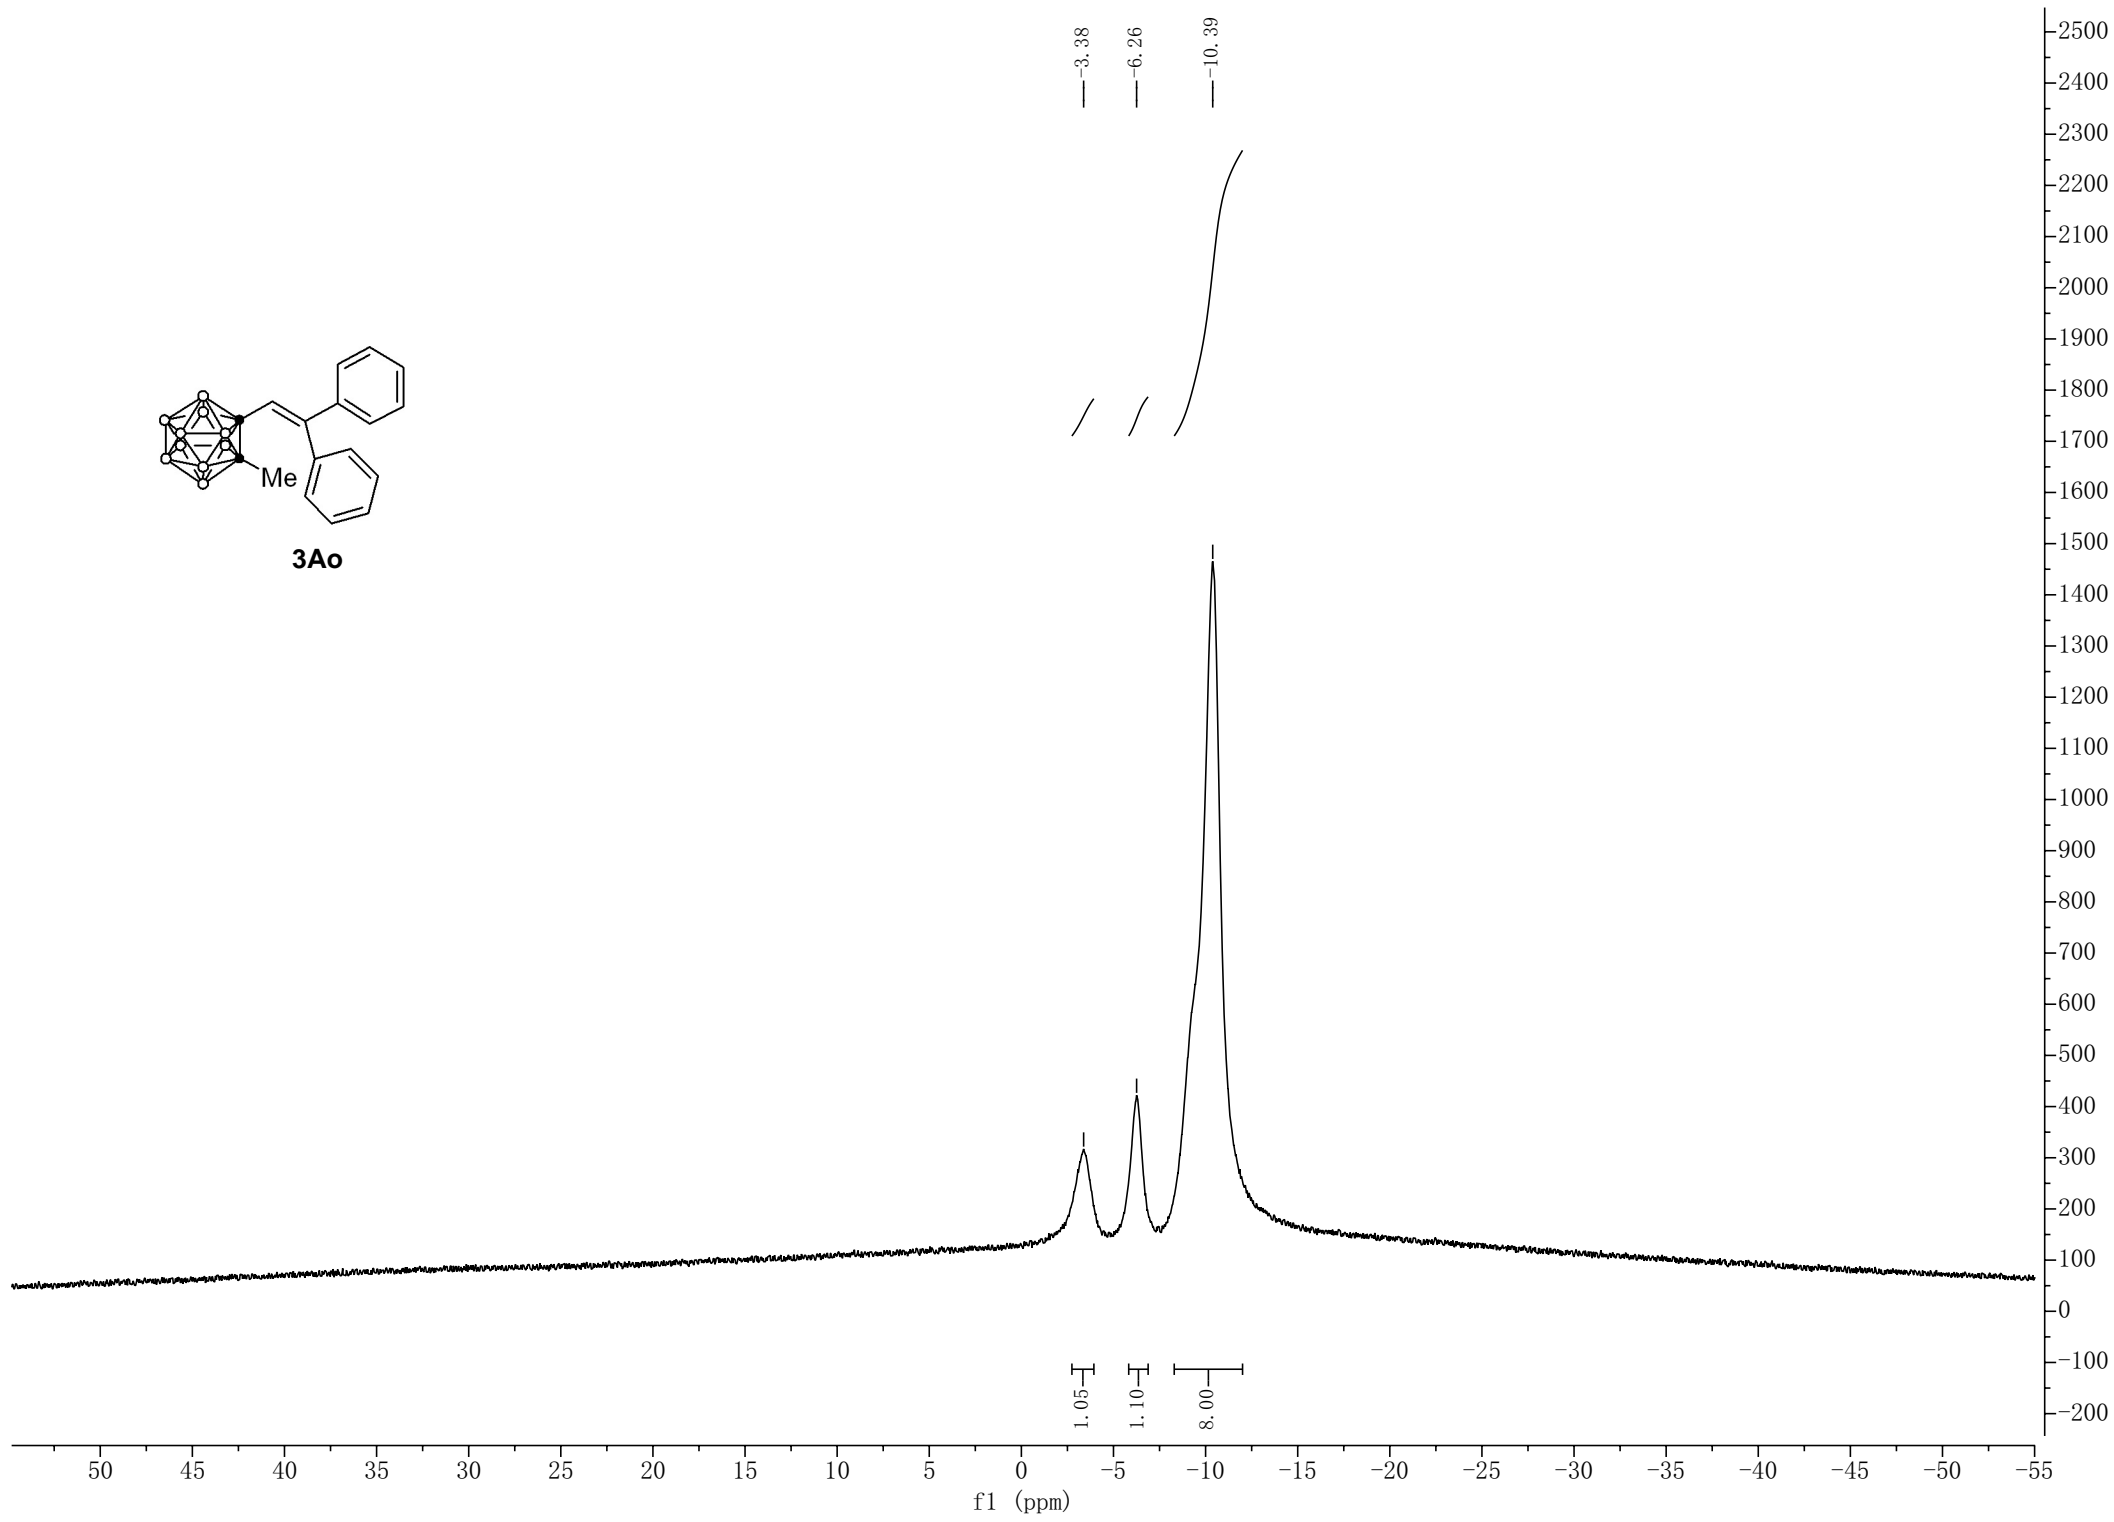

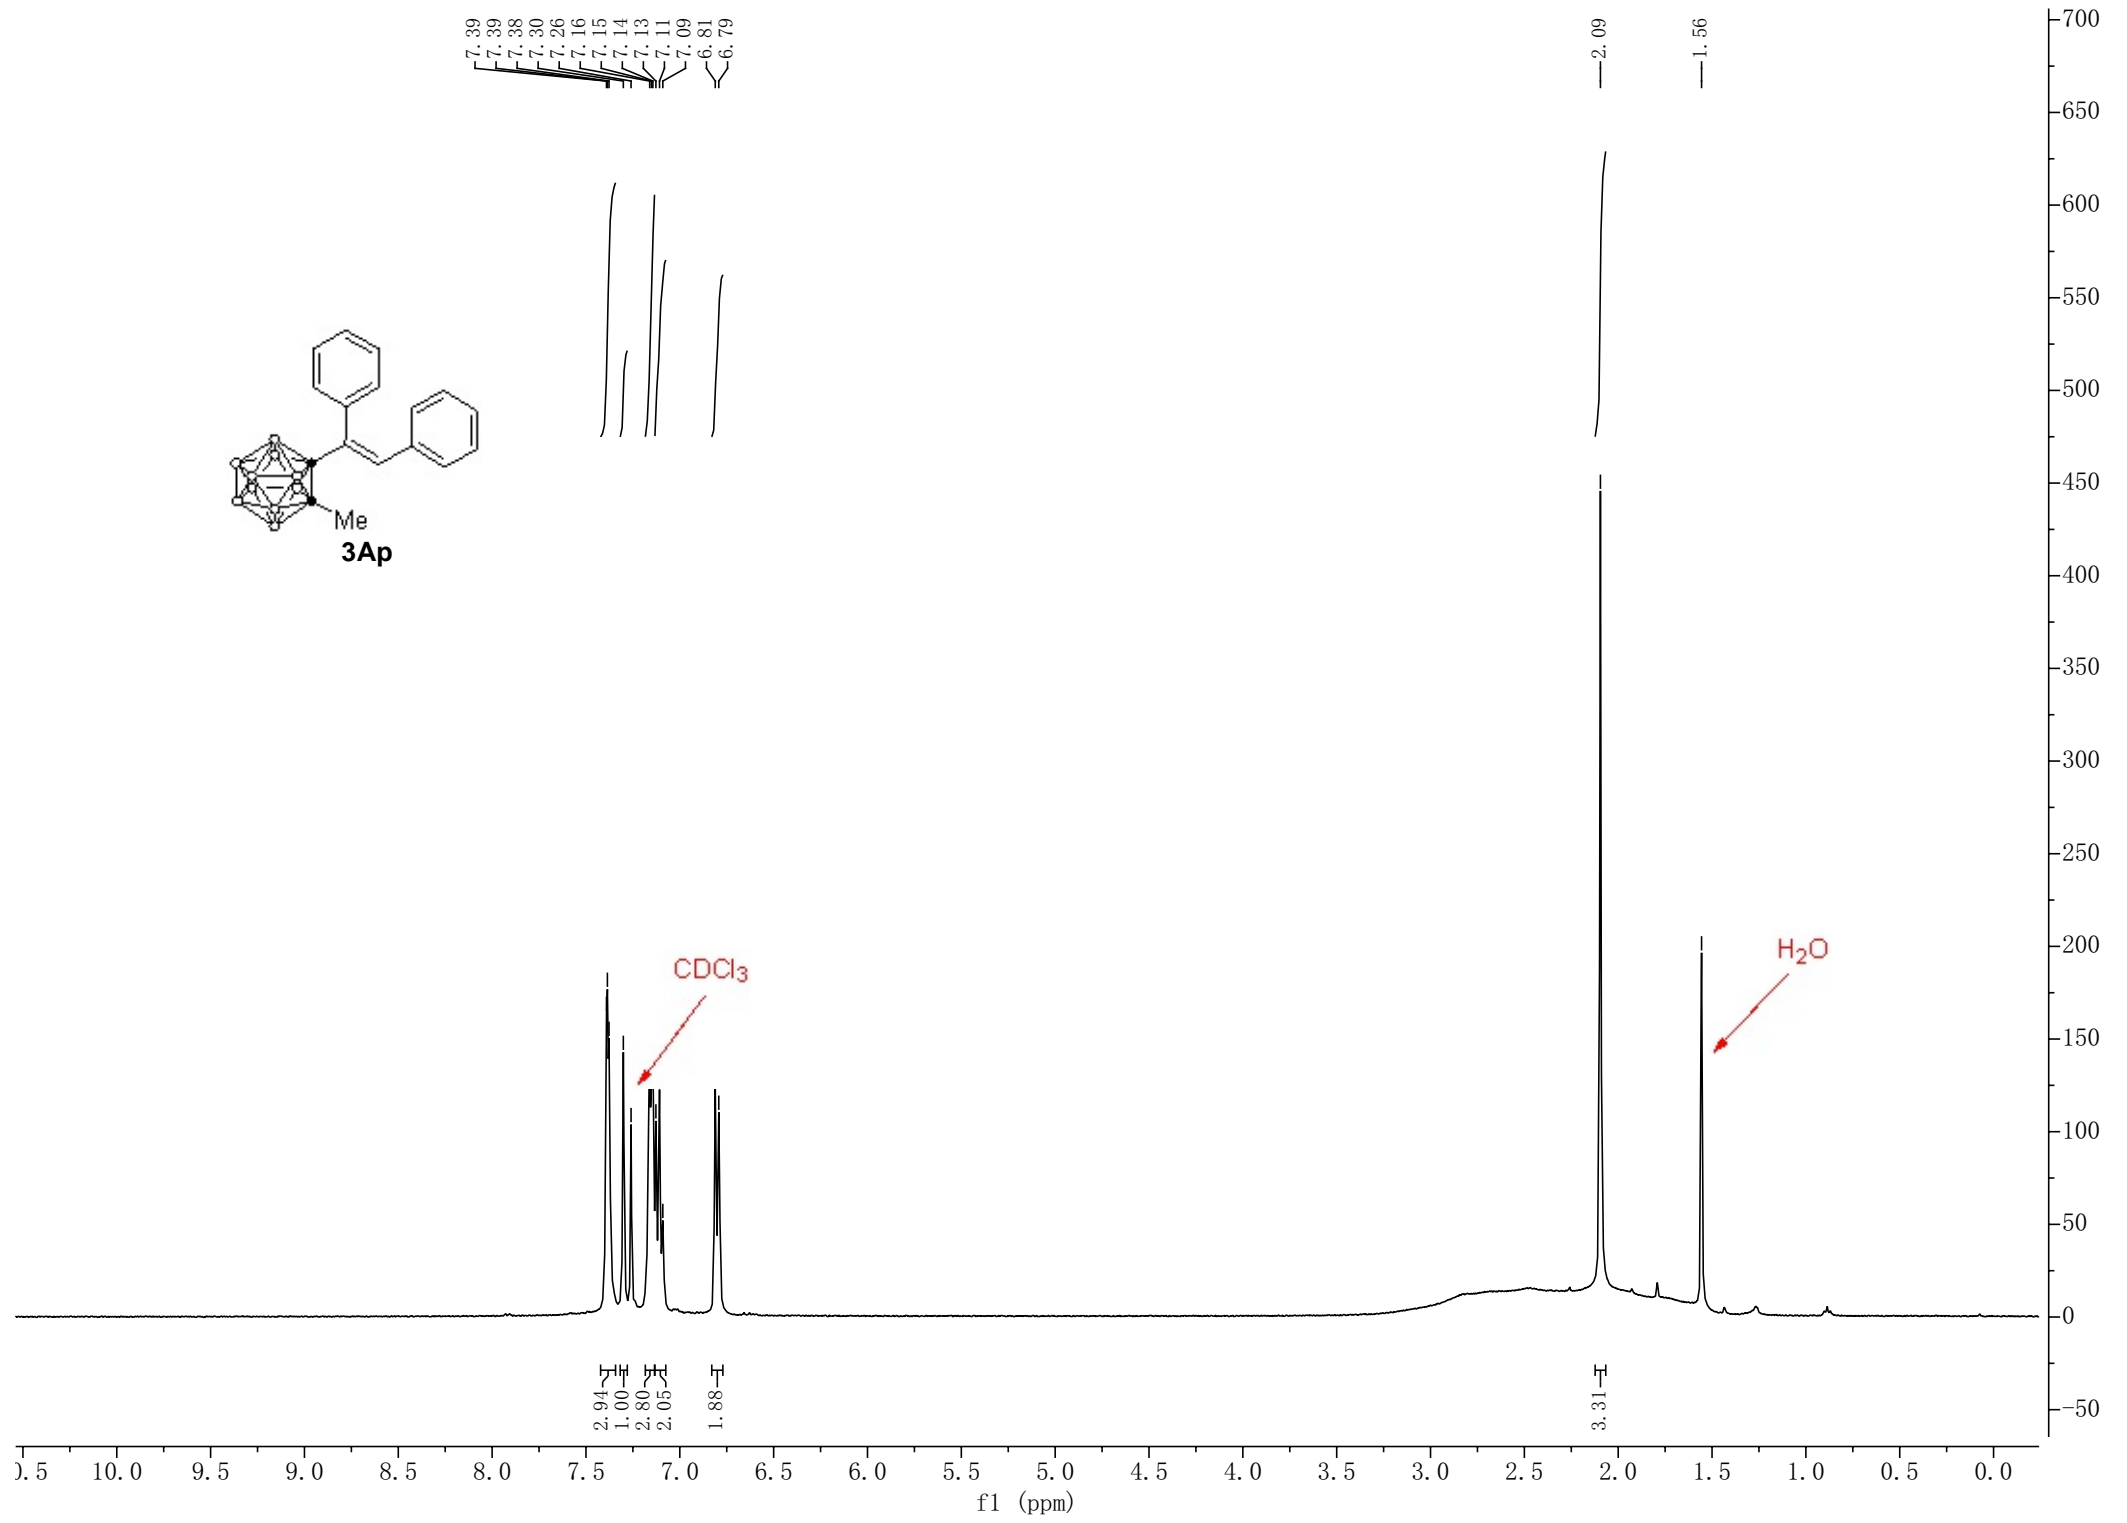



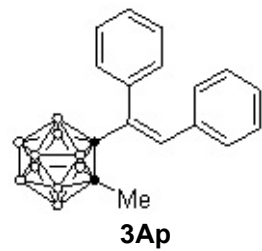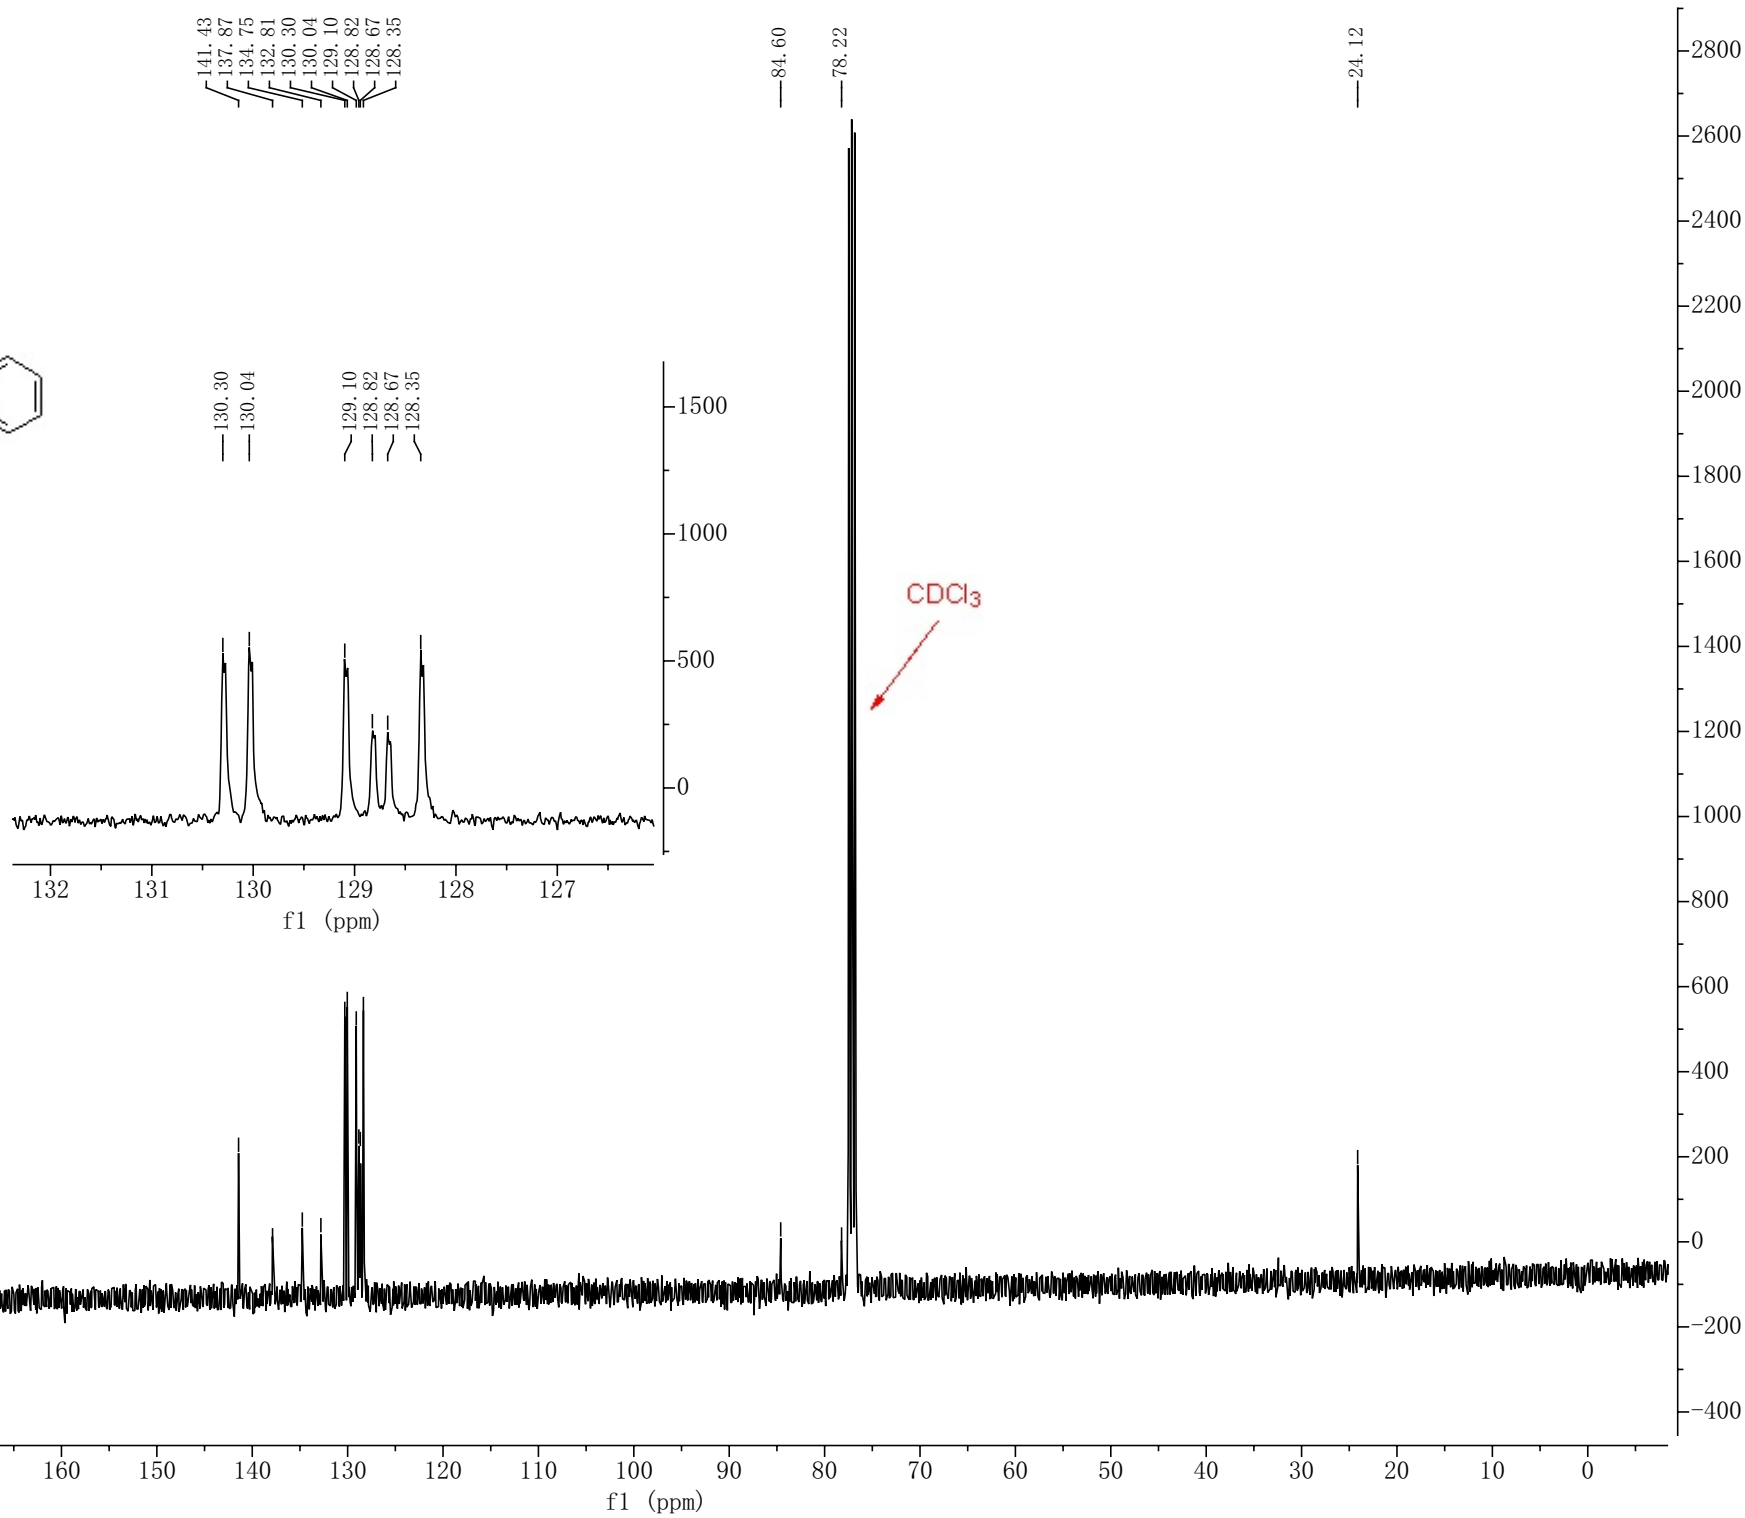

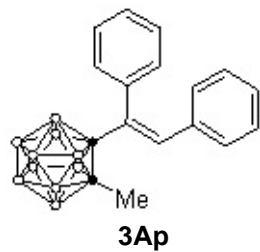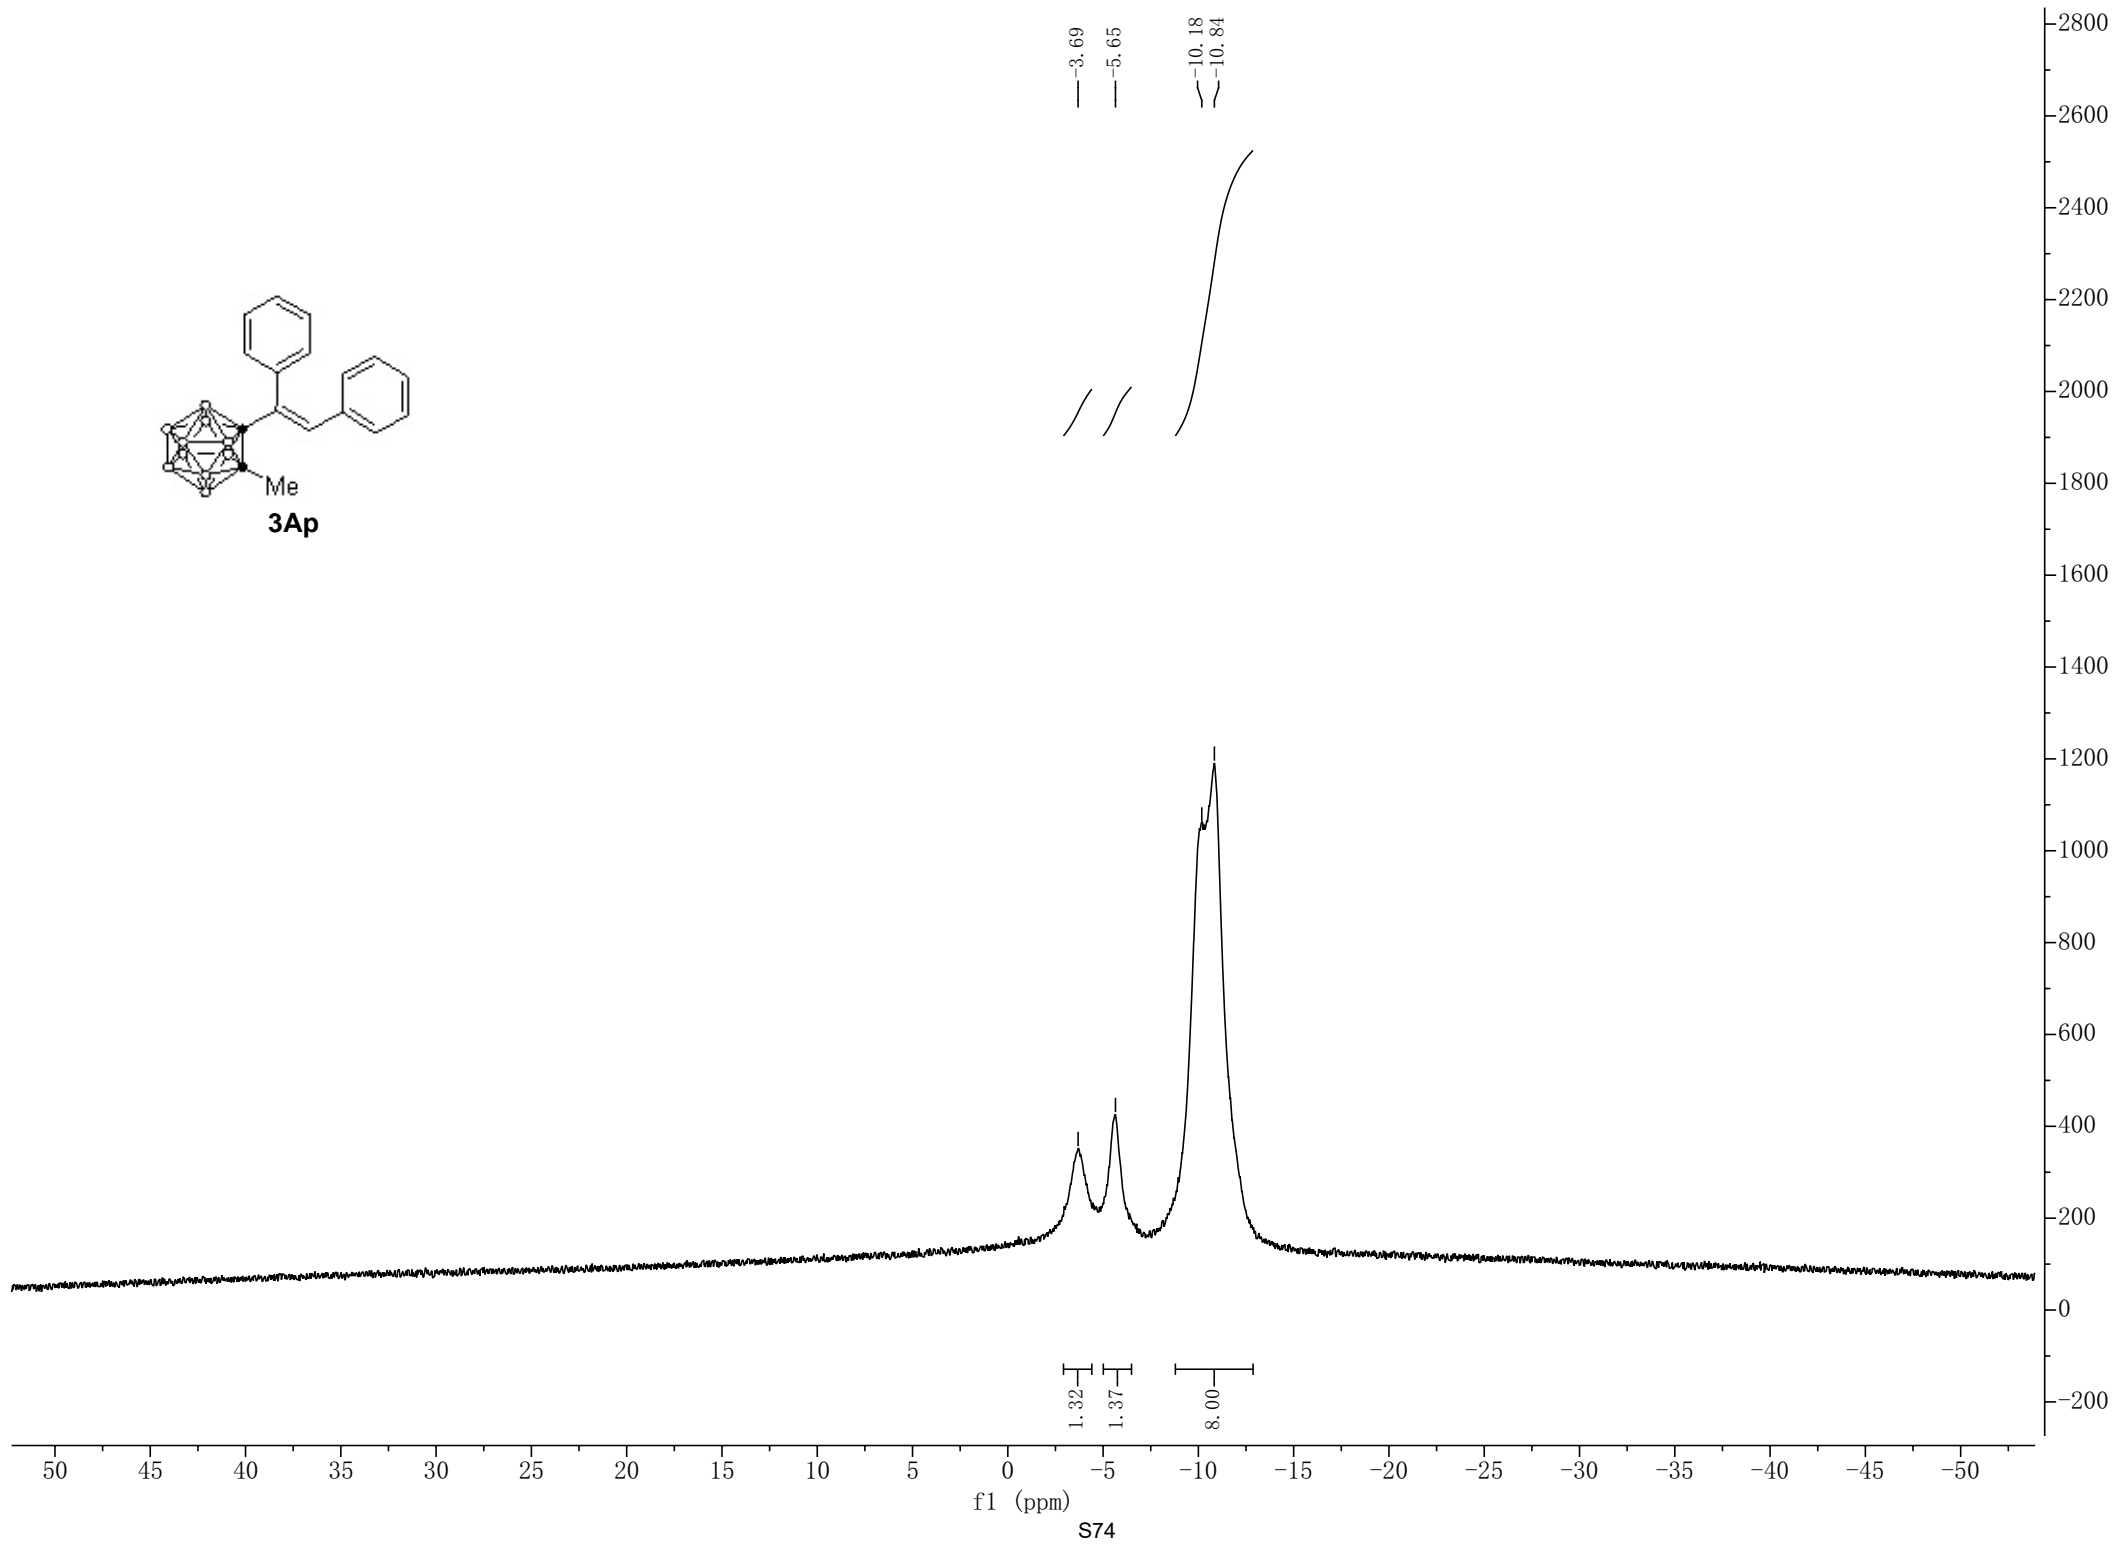

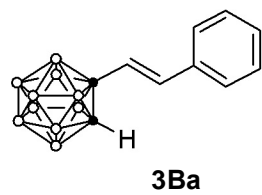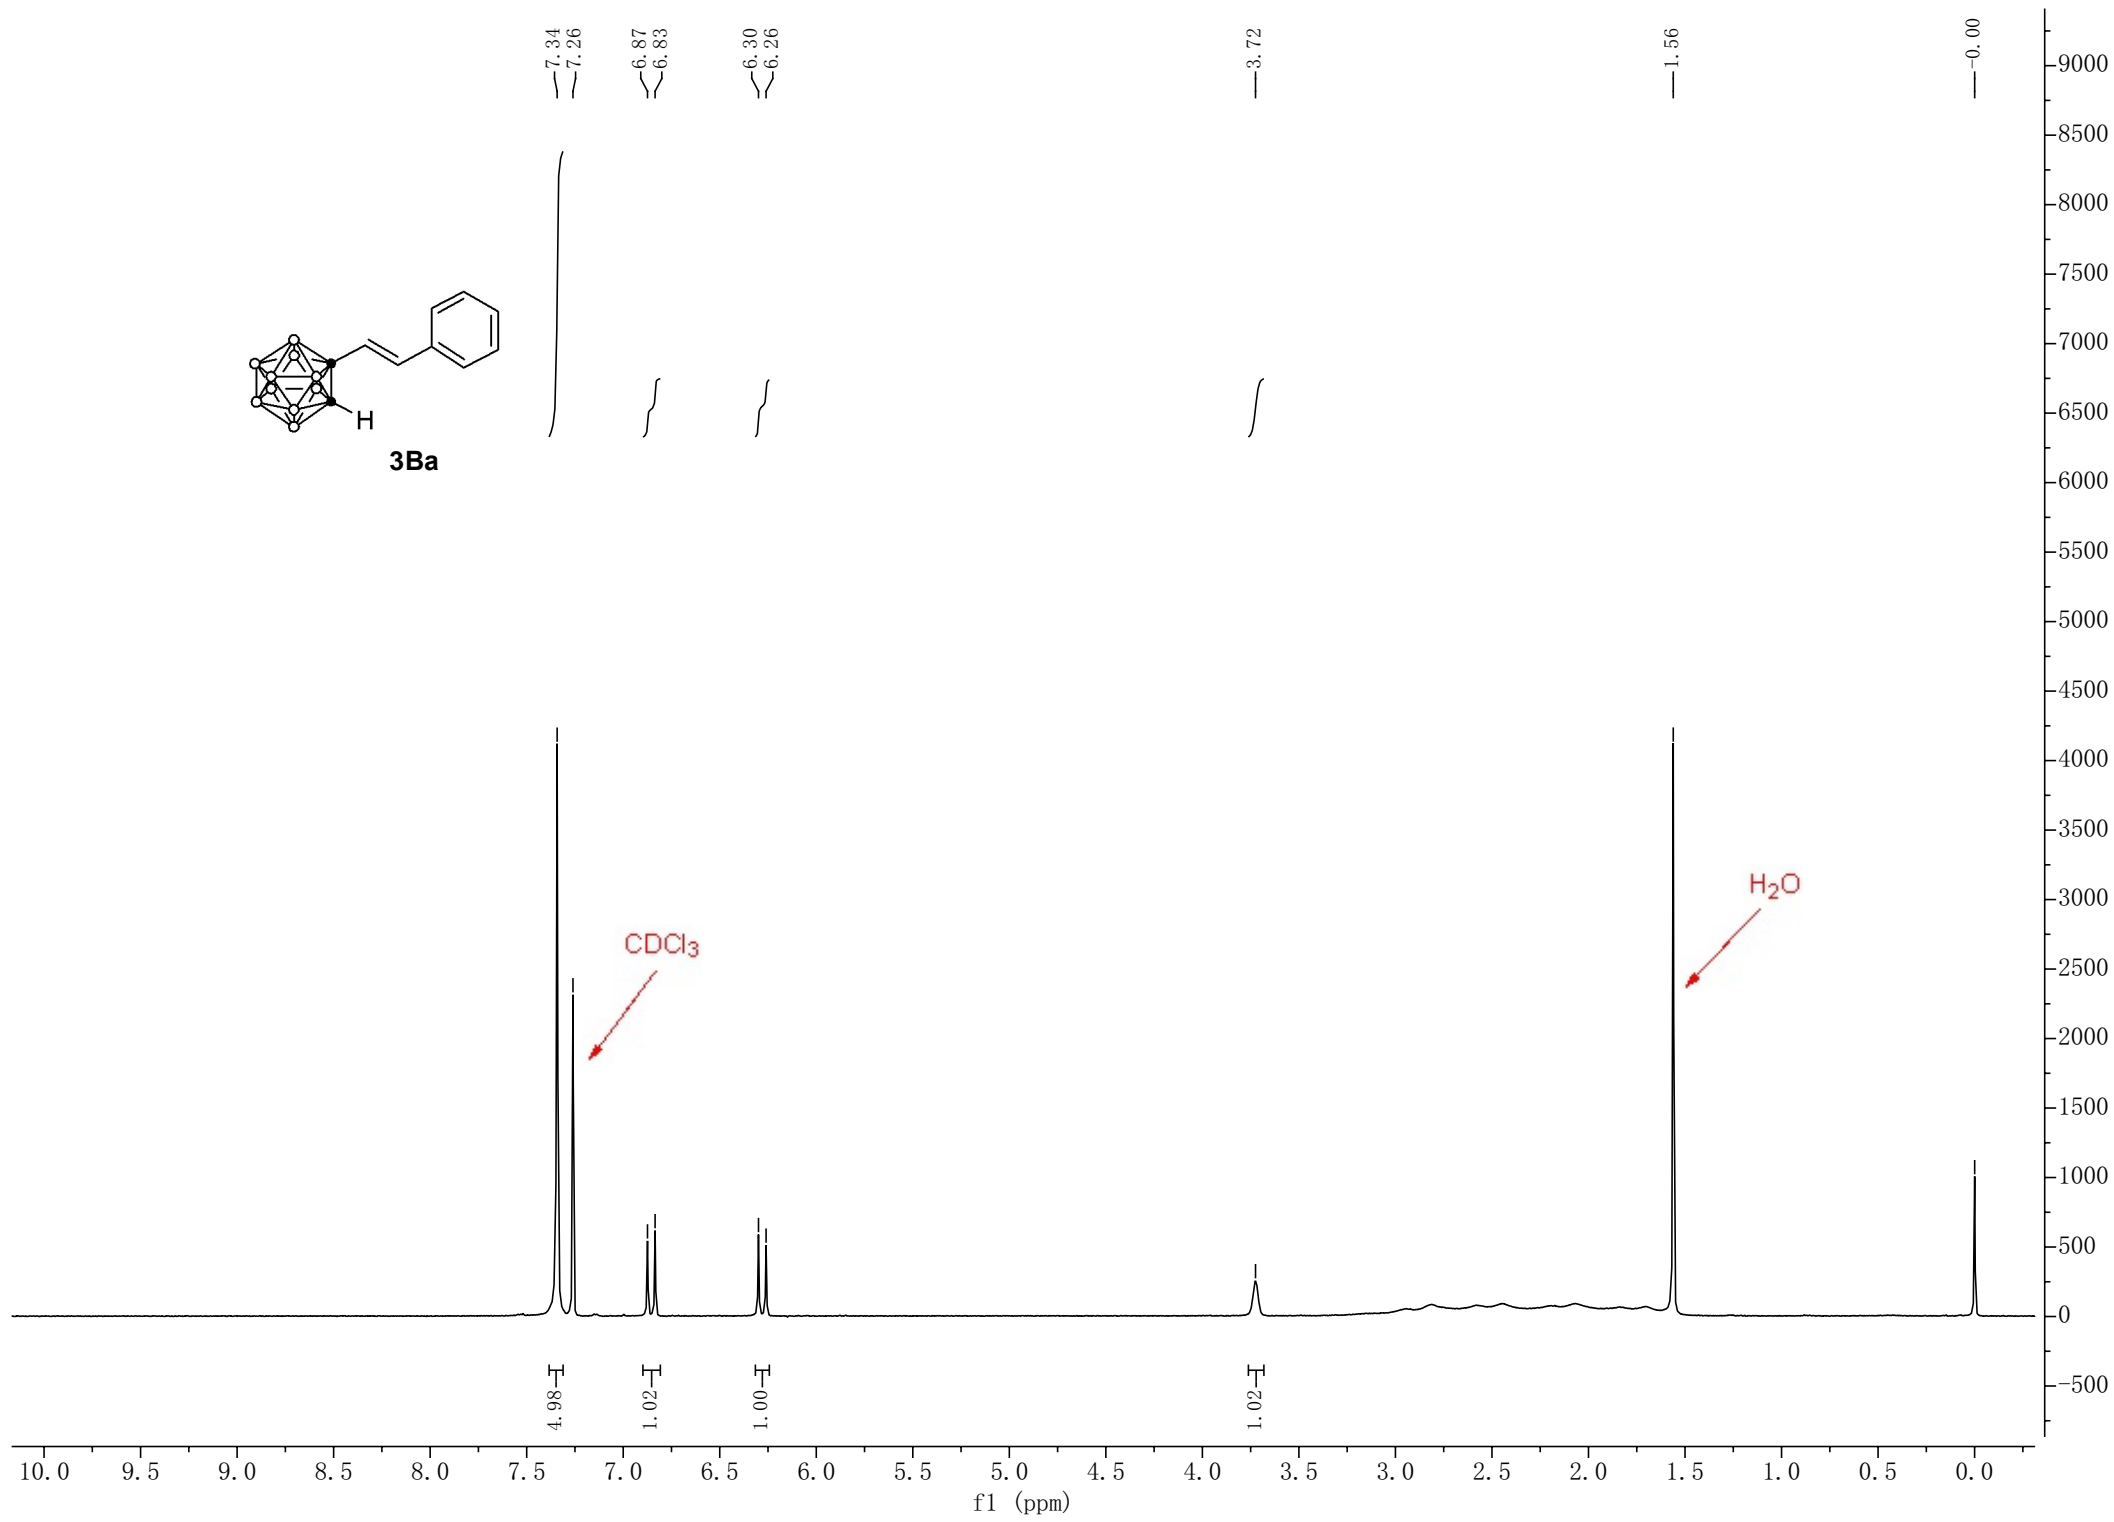

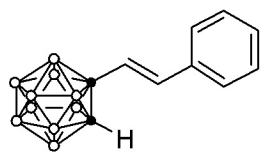

**3Ba**

— 2.17  
— 5.24  
— 9.45  
— 11.22  
— 11.95  
— 13.15

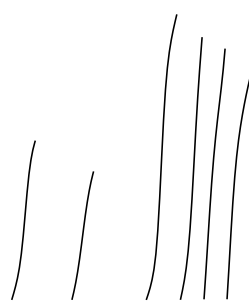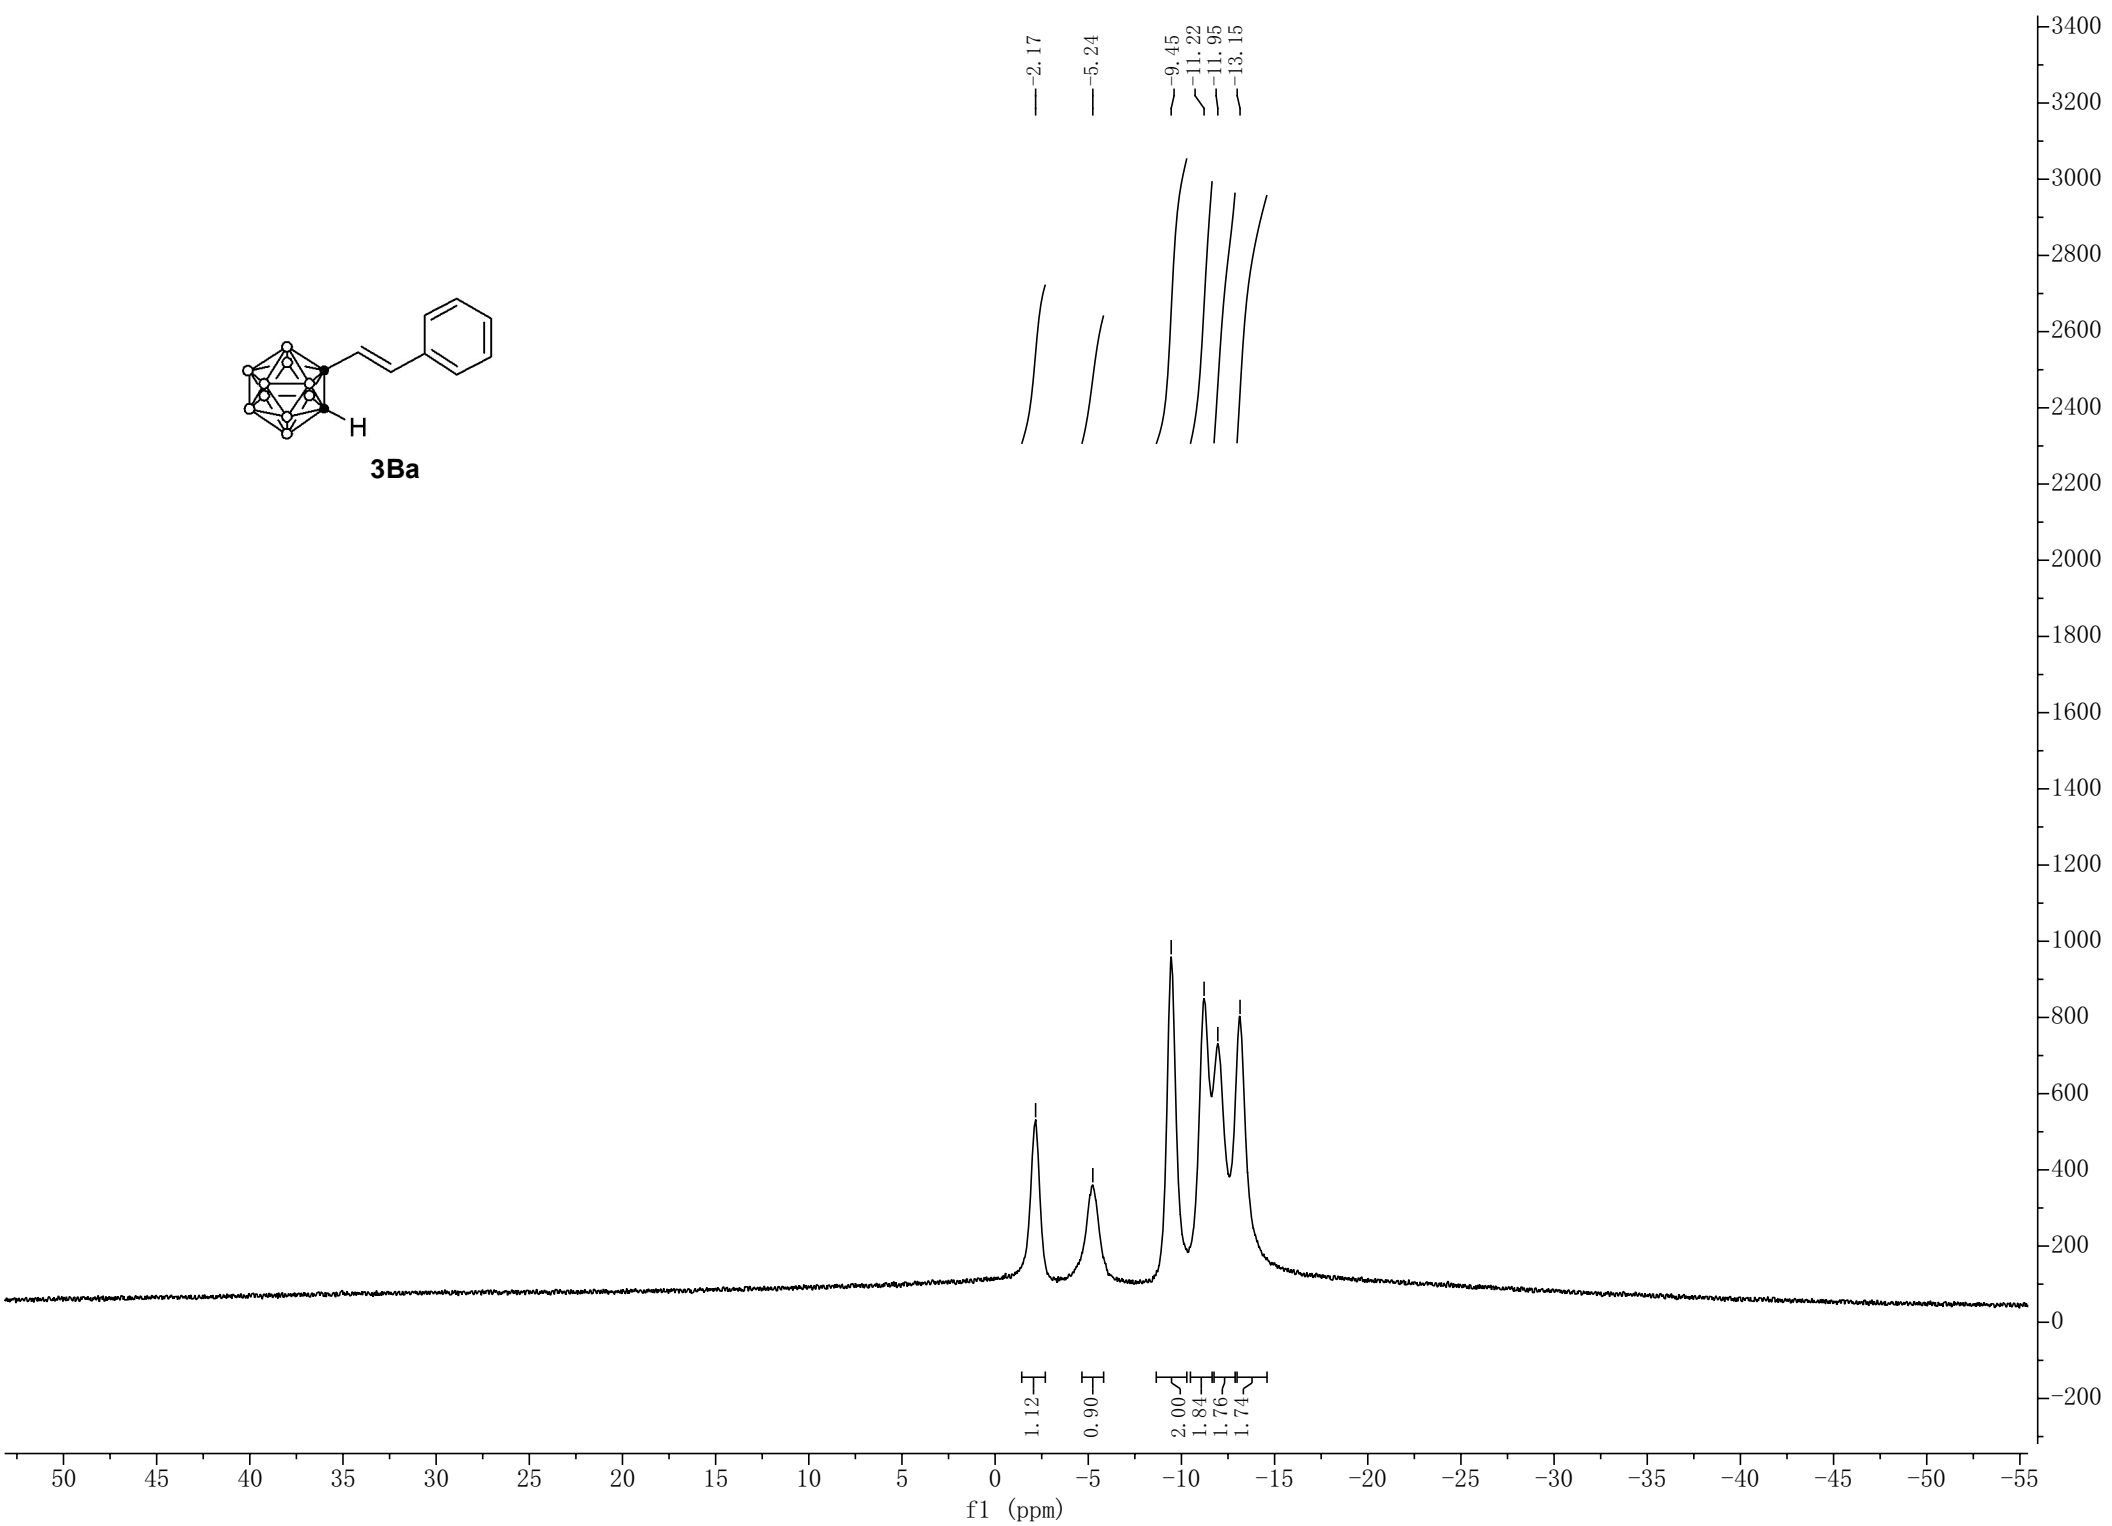

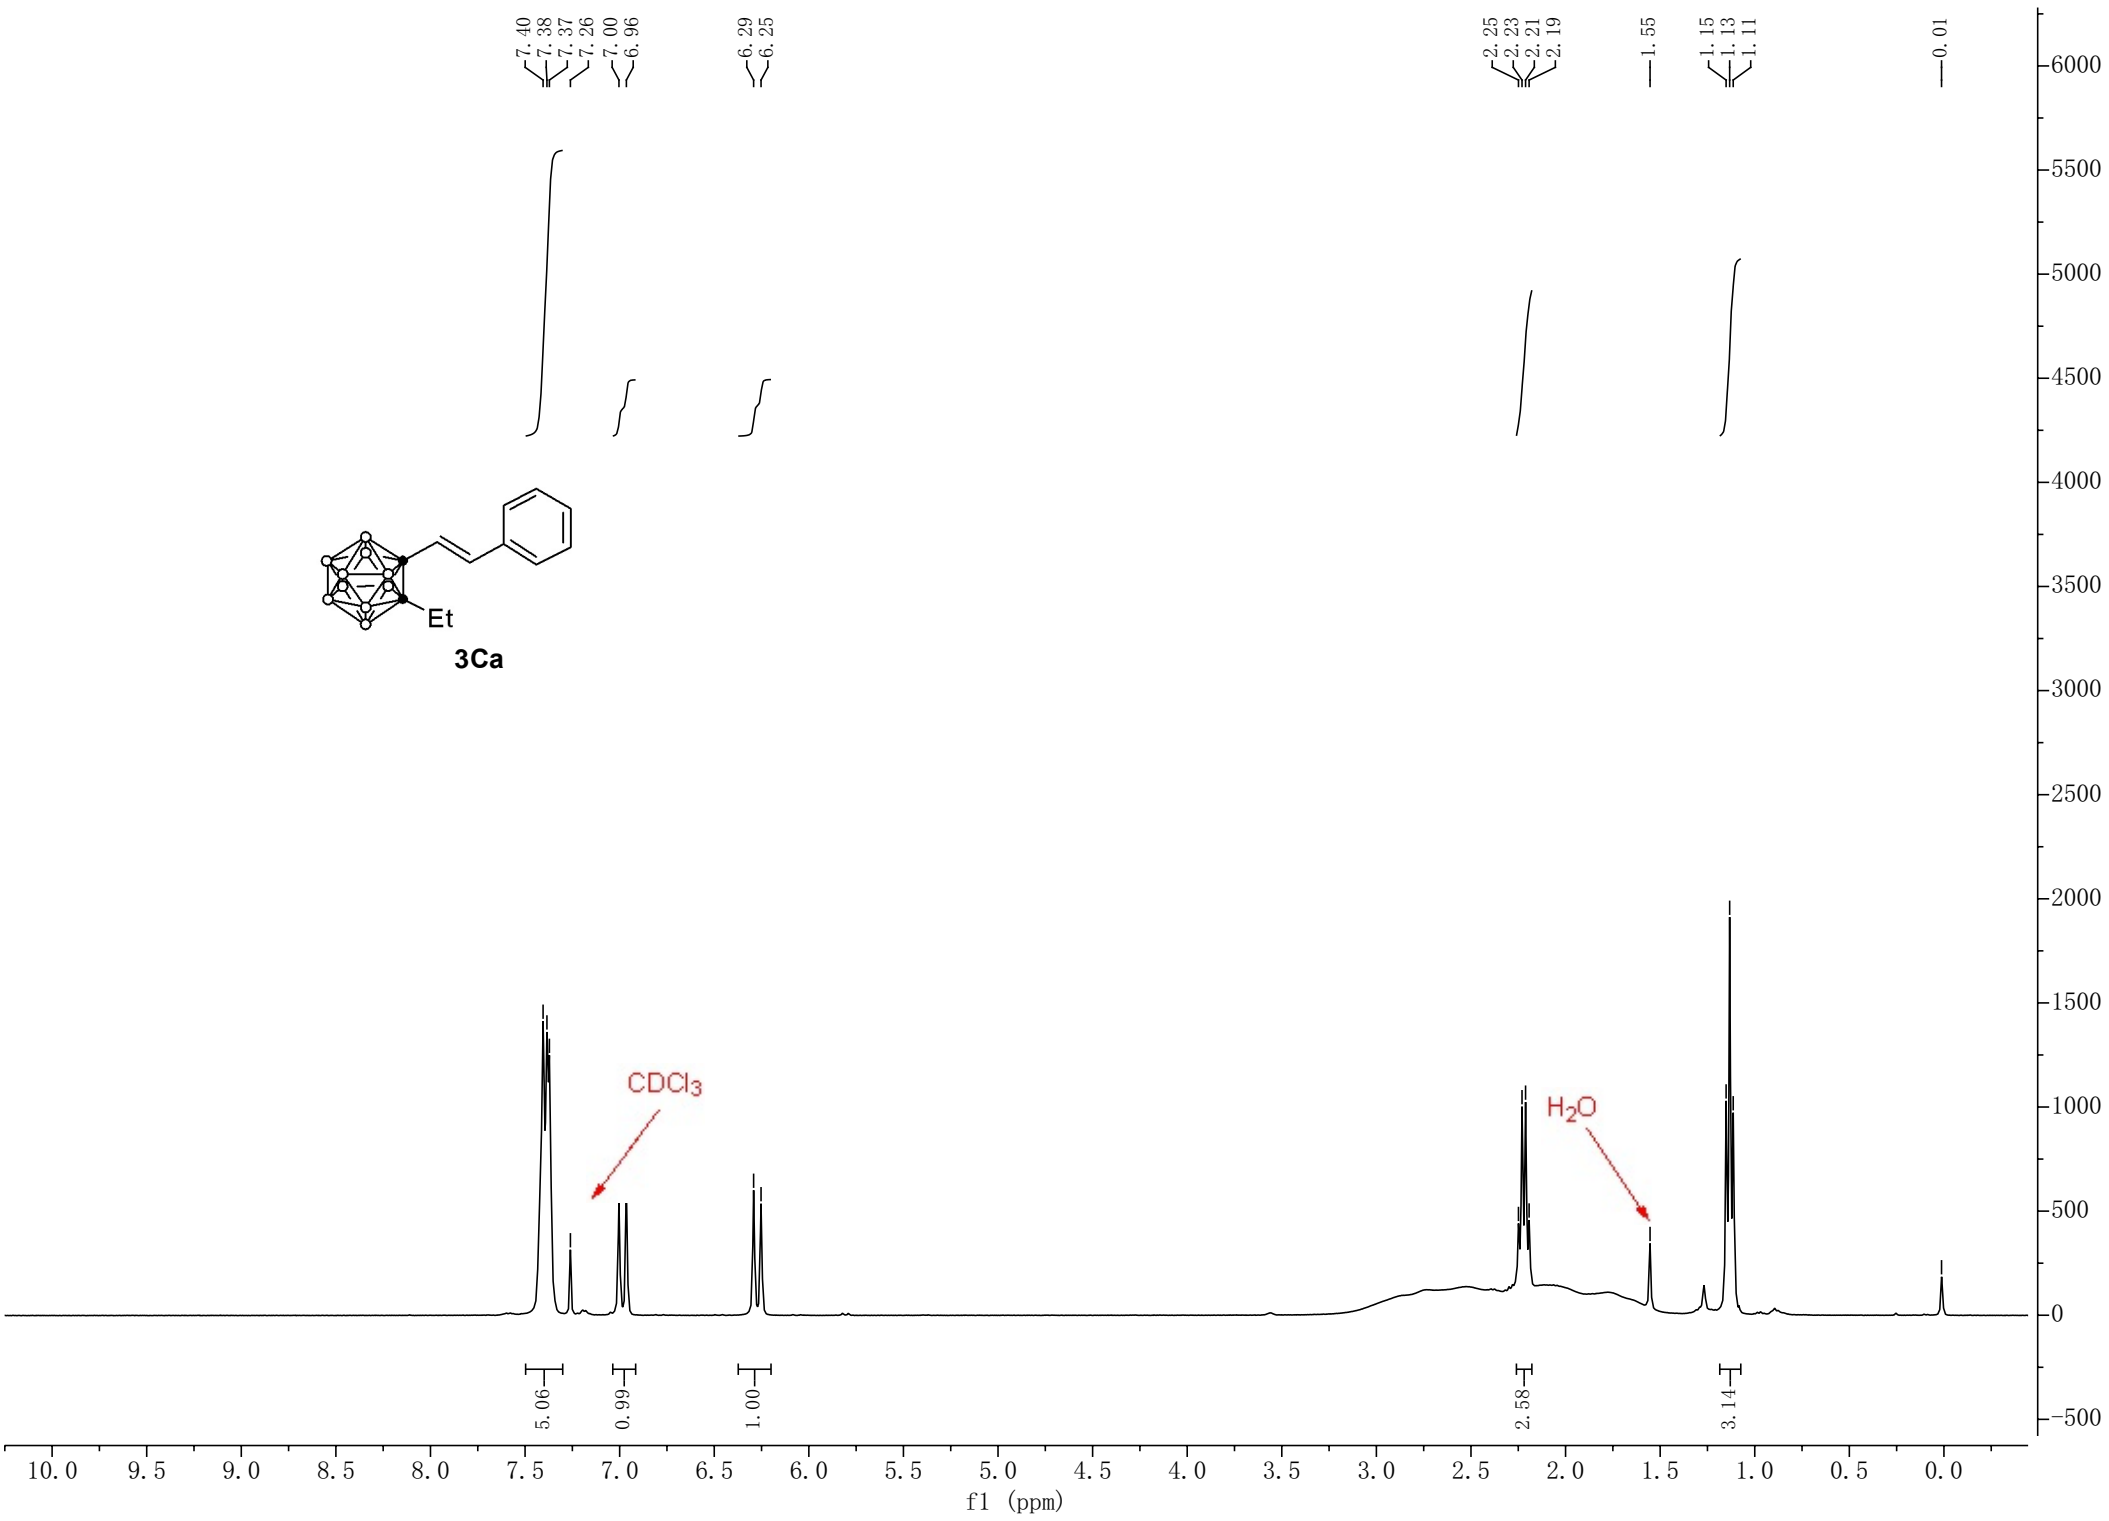

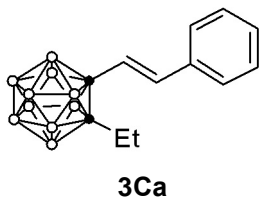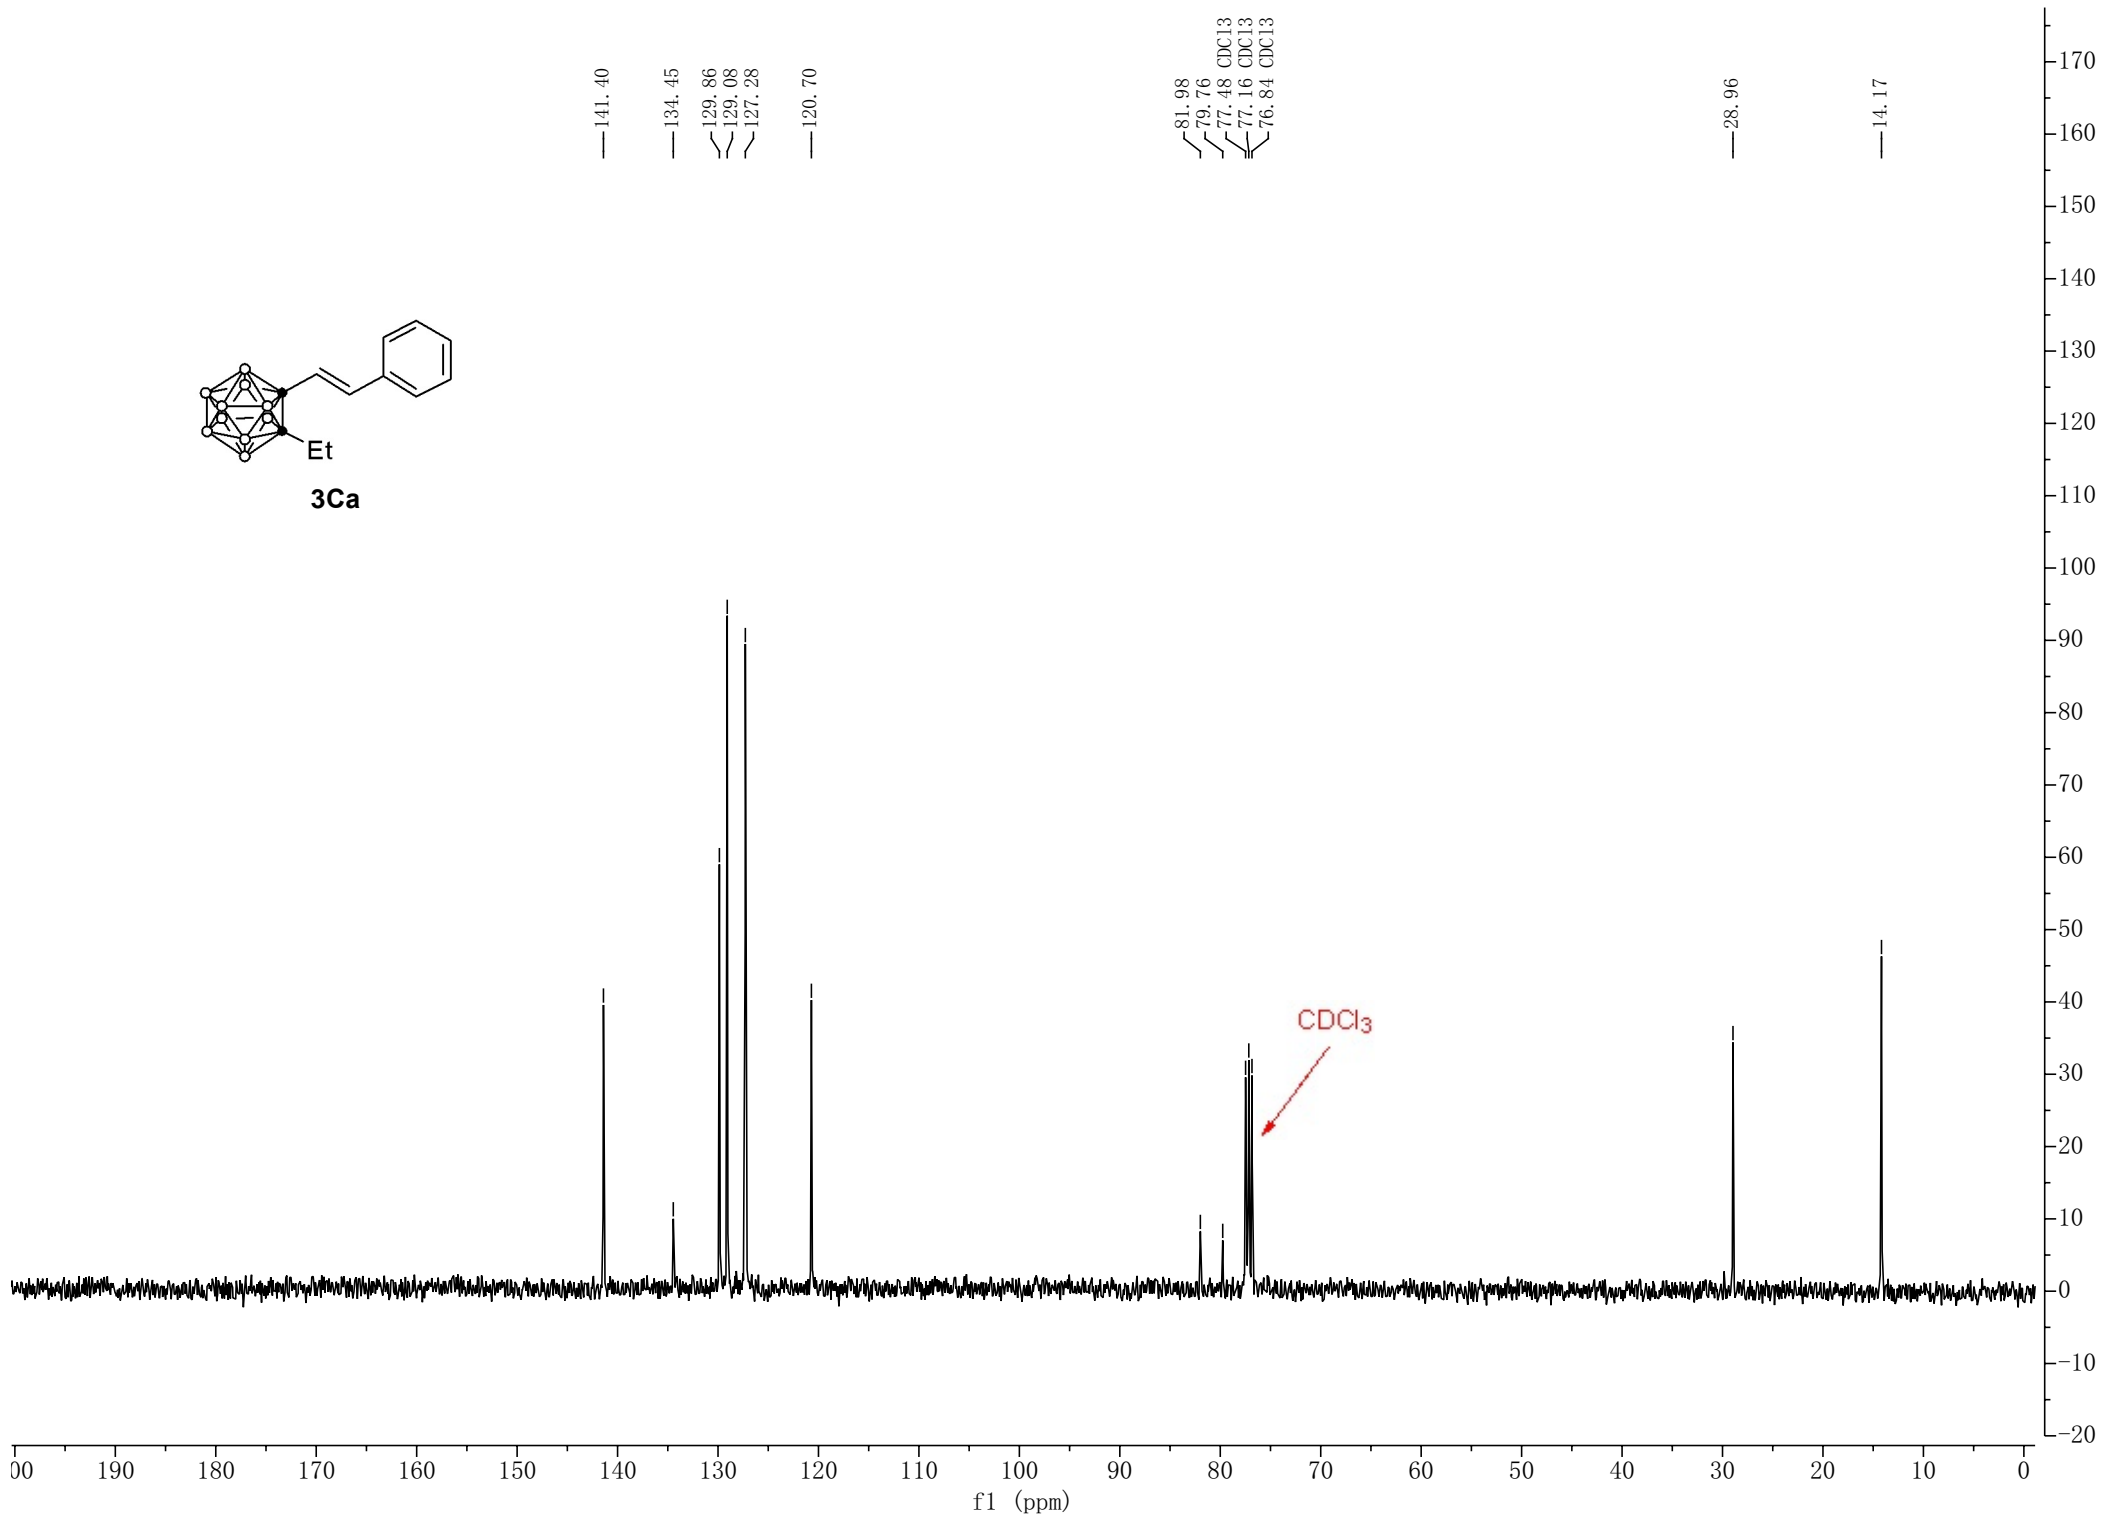

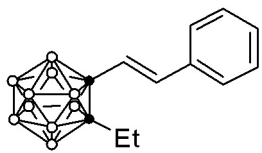

**3Ca**

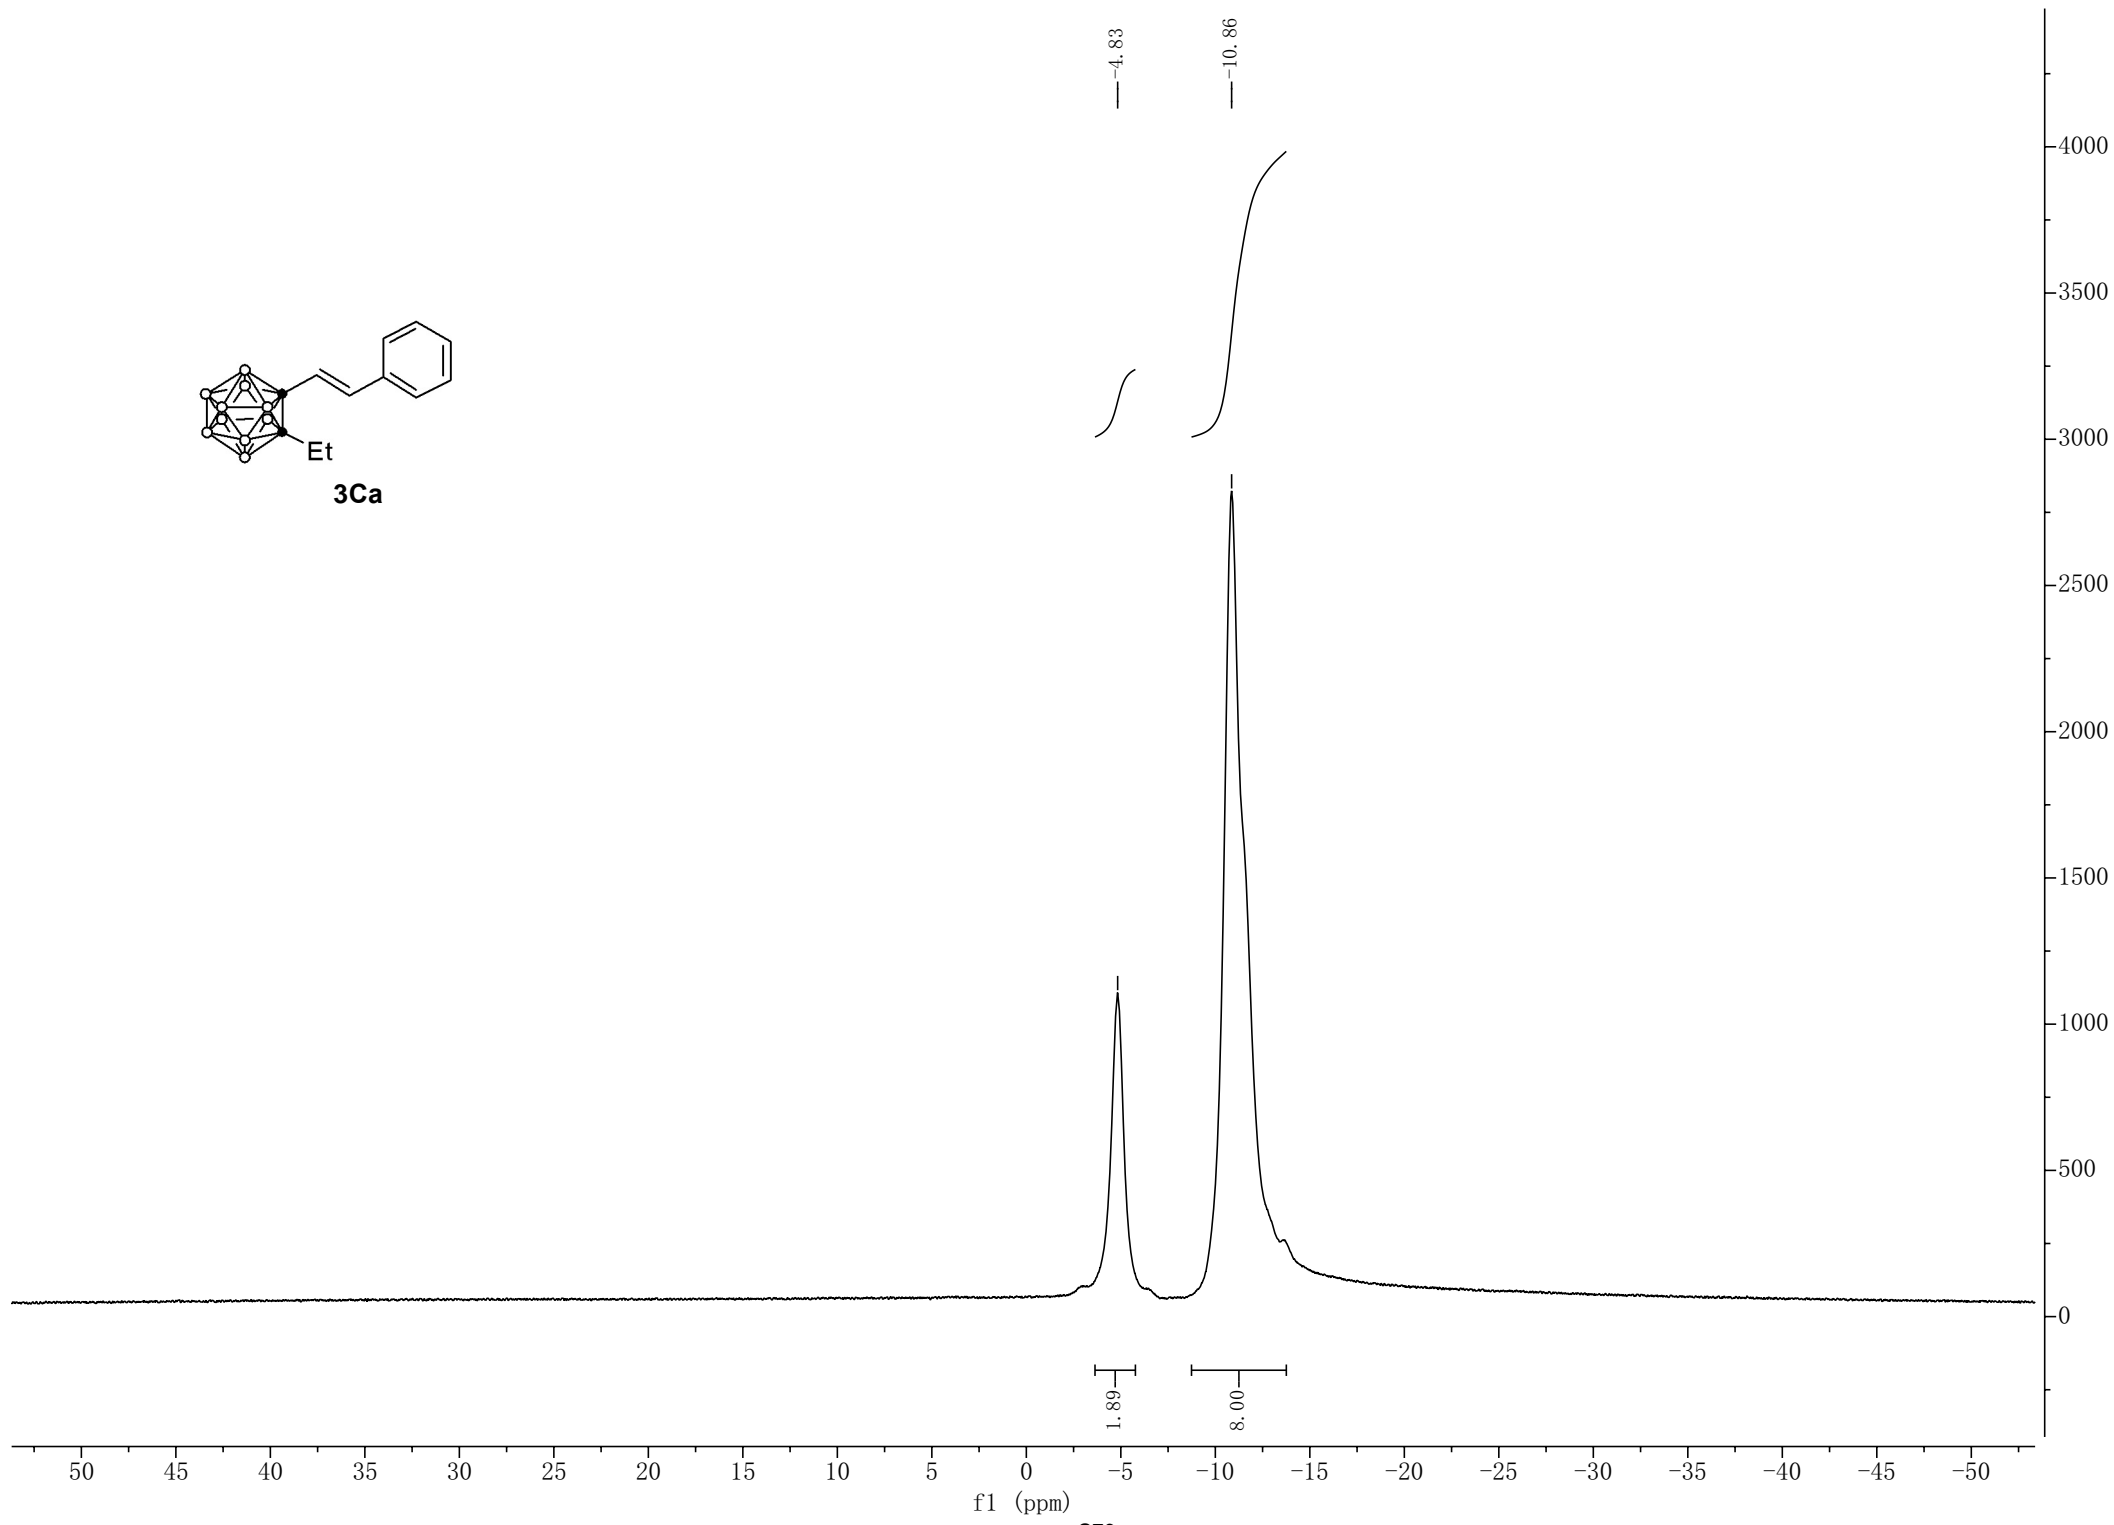

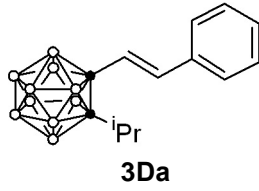

7.44  
7.43  
7.43  
7.42  
7.41  
7.41  
7.40  
7.39  
7.39  
7.38  
7.37  
7.26  
7.00  
6.96

6.30  
6.26

2.32  
2.30  
2.28  
2.26  
2.25  
2.23  
2.21

1.58

1.21  
1.19

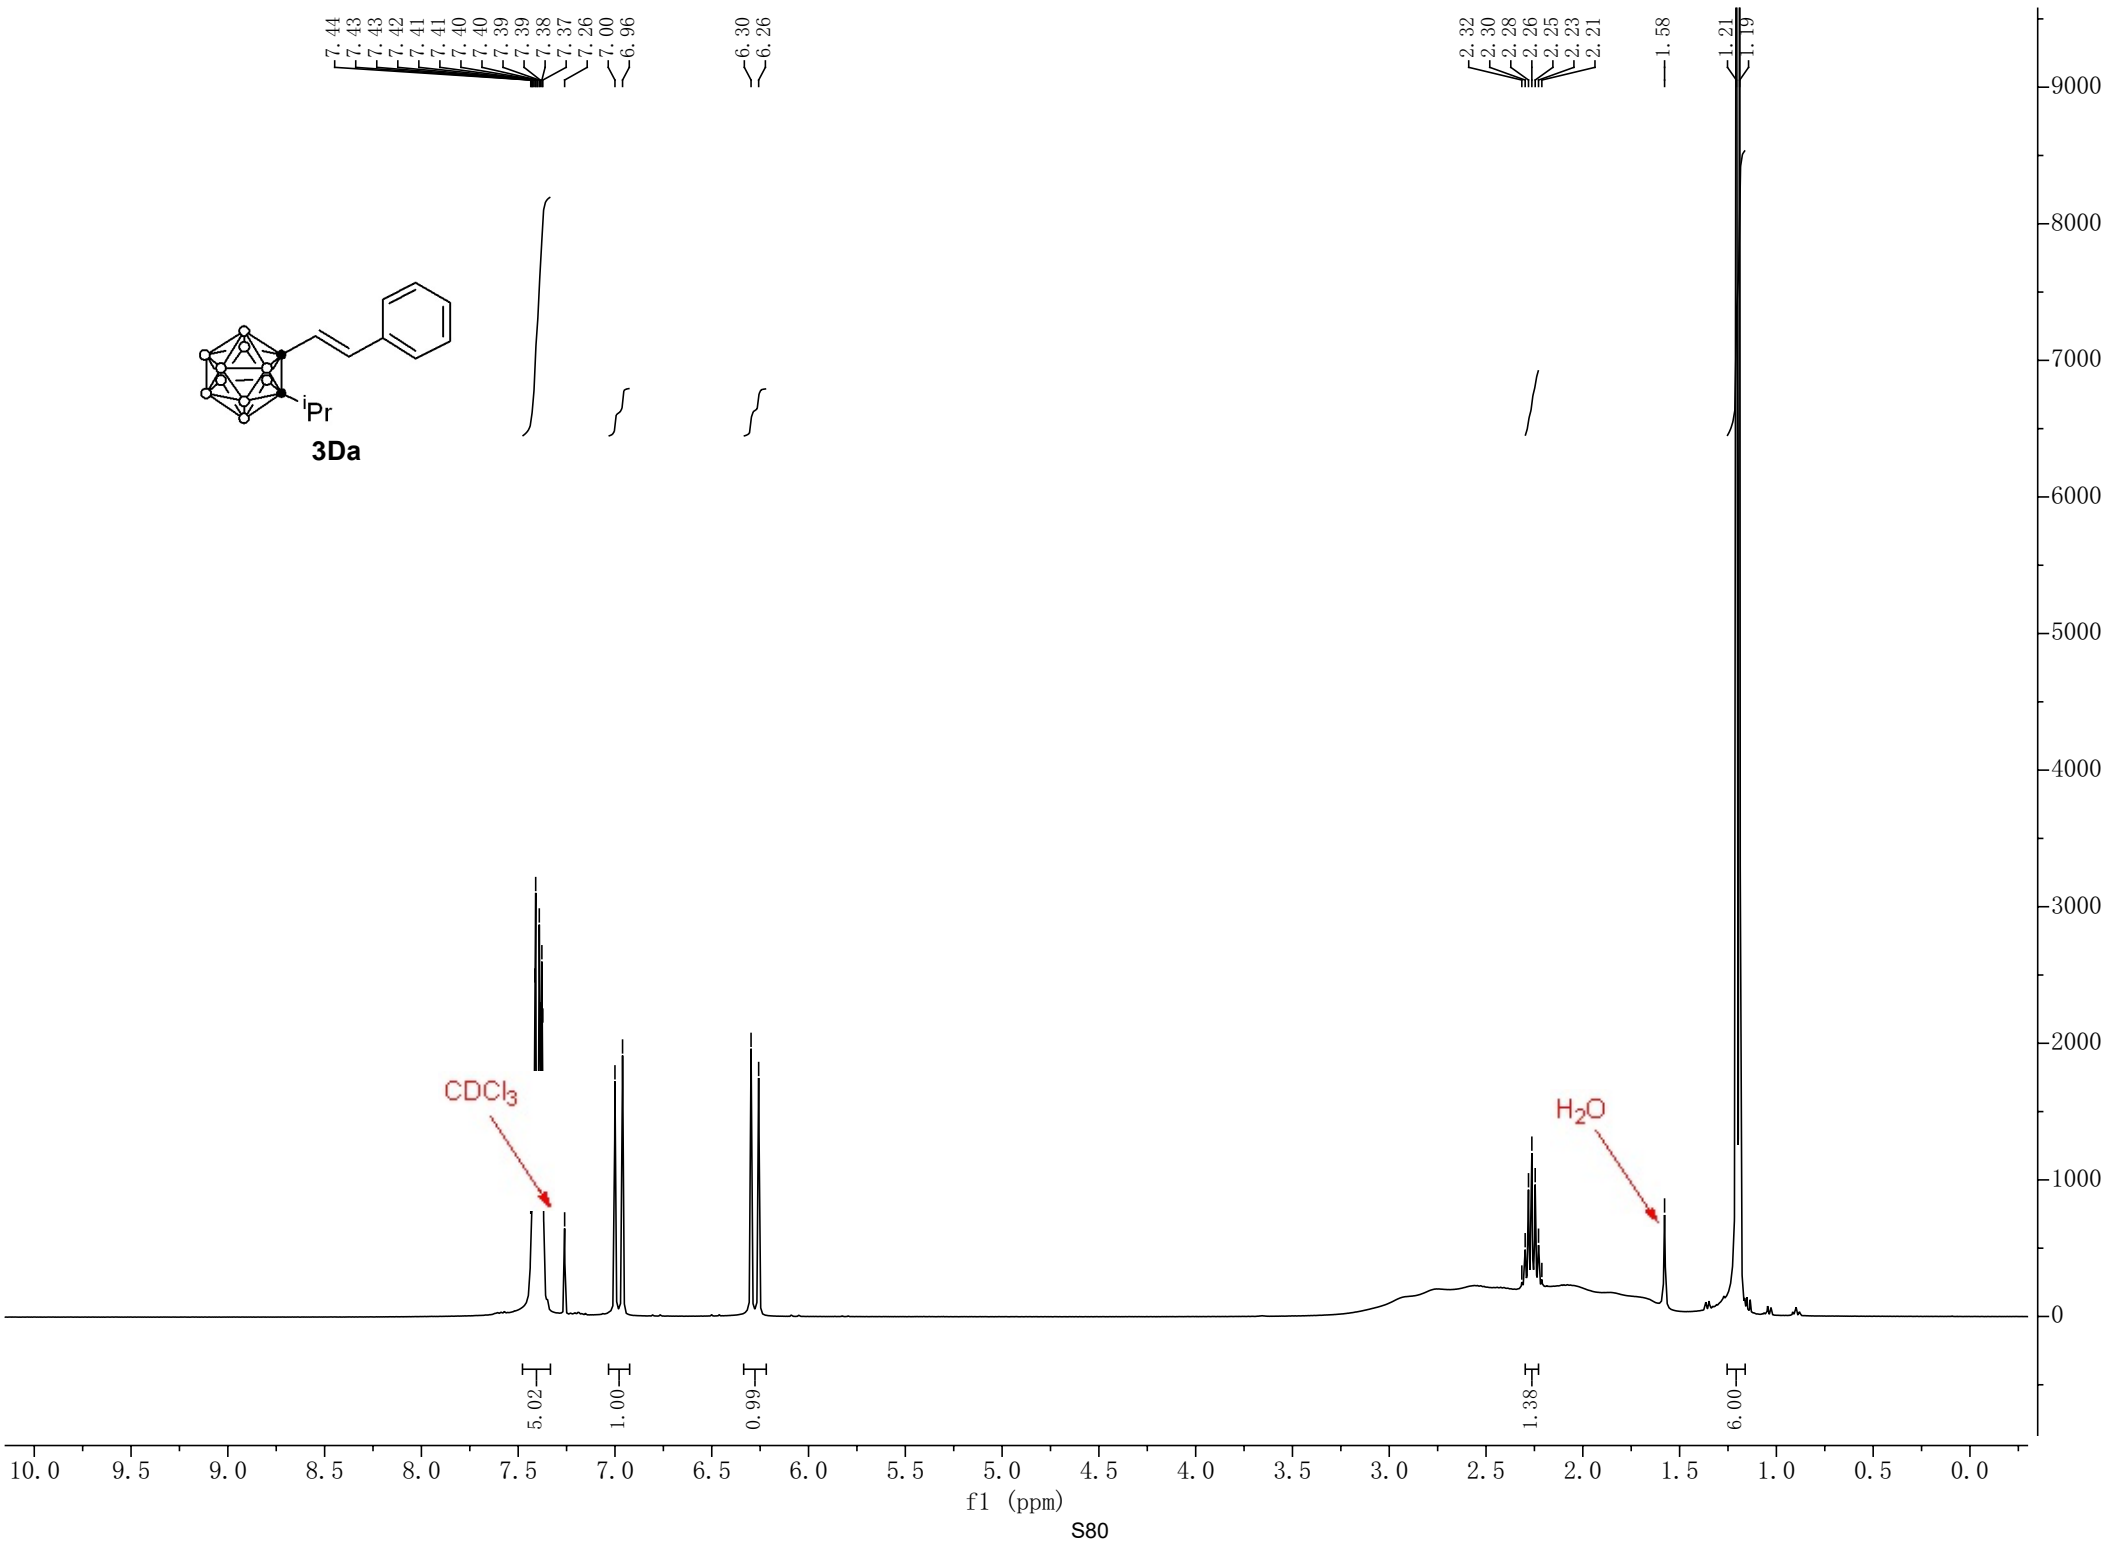



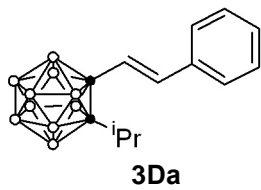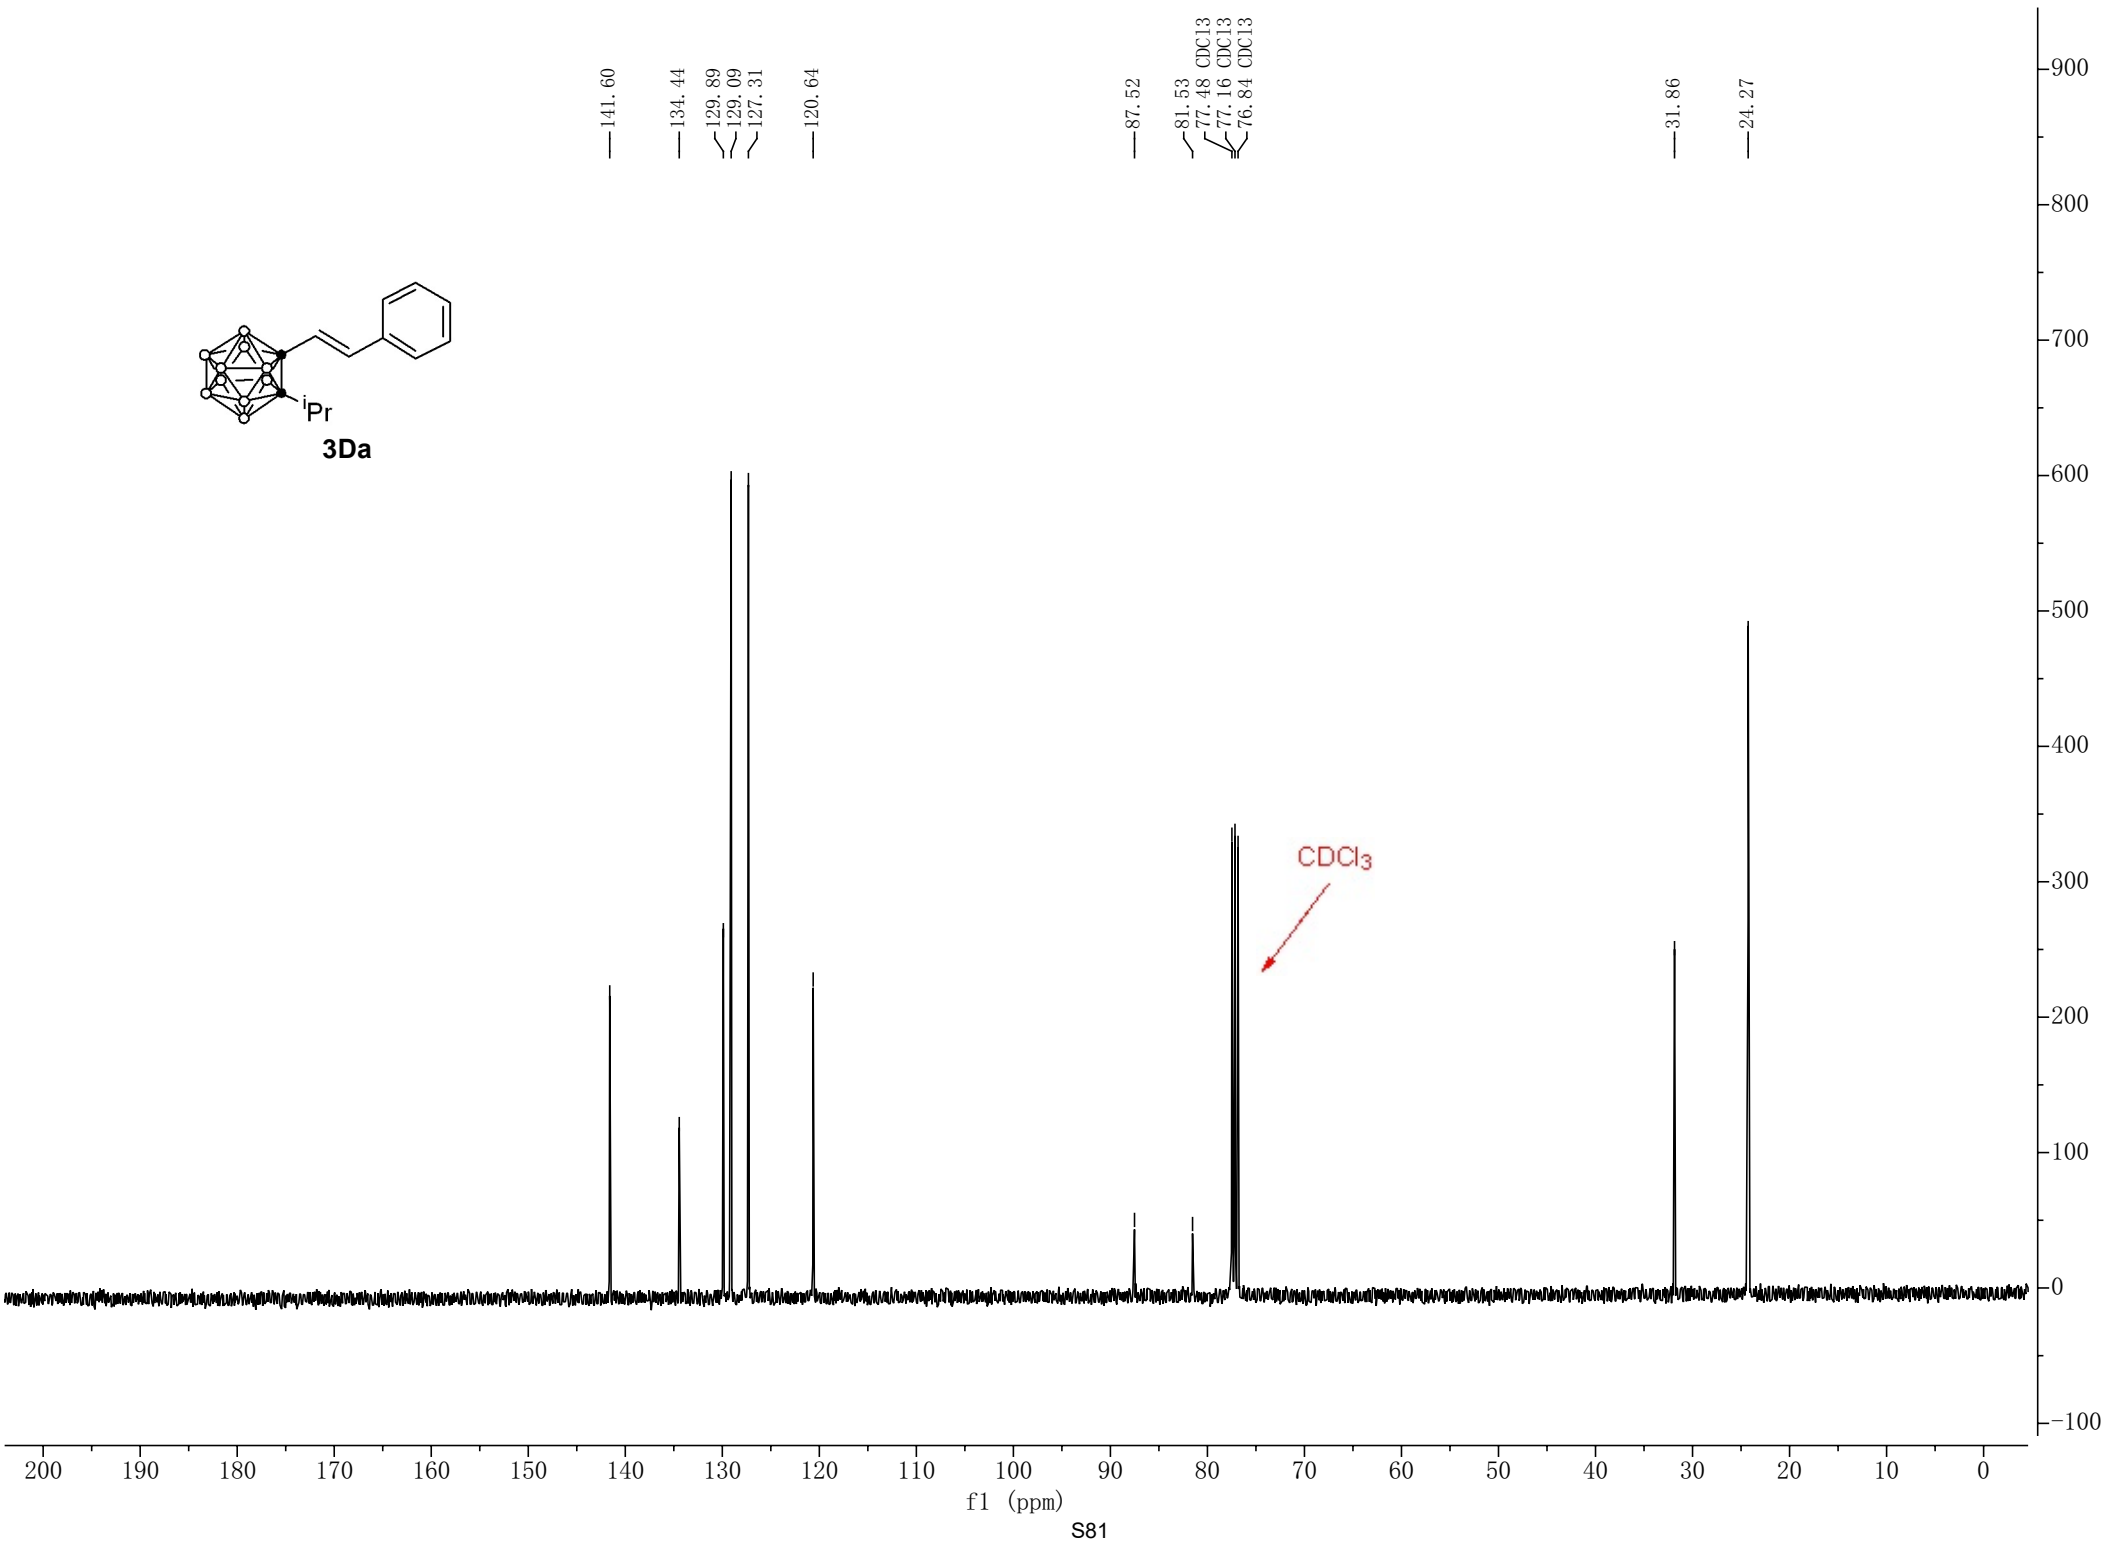

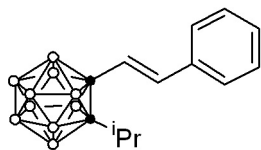

**3Da**

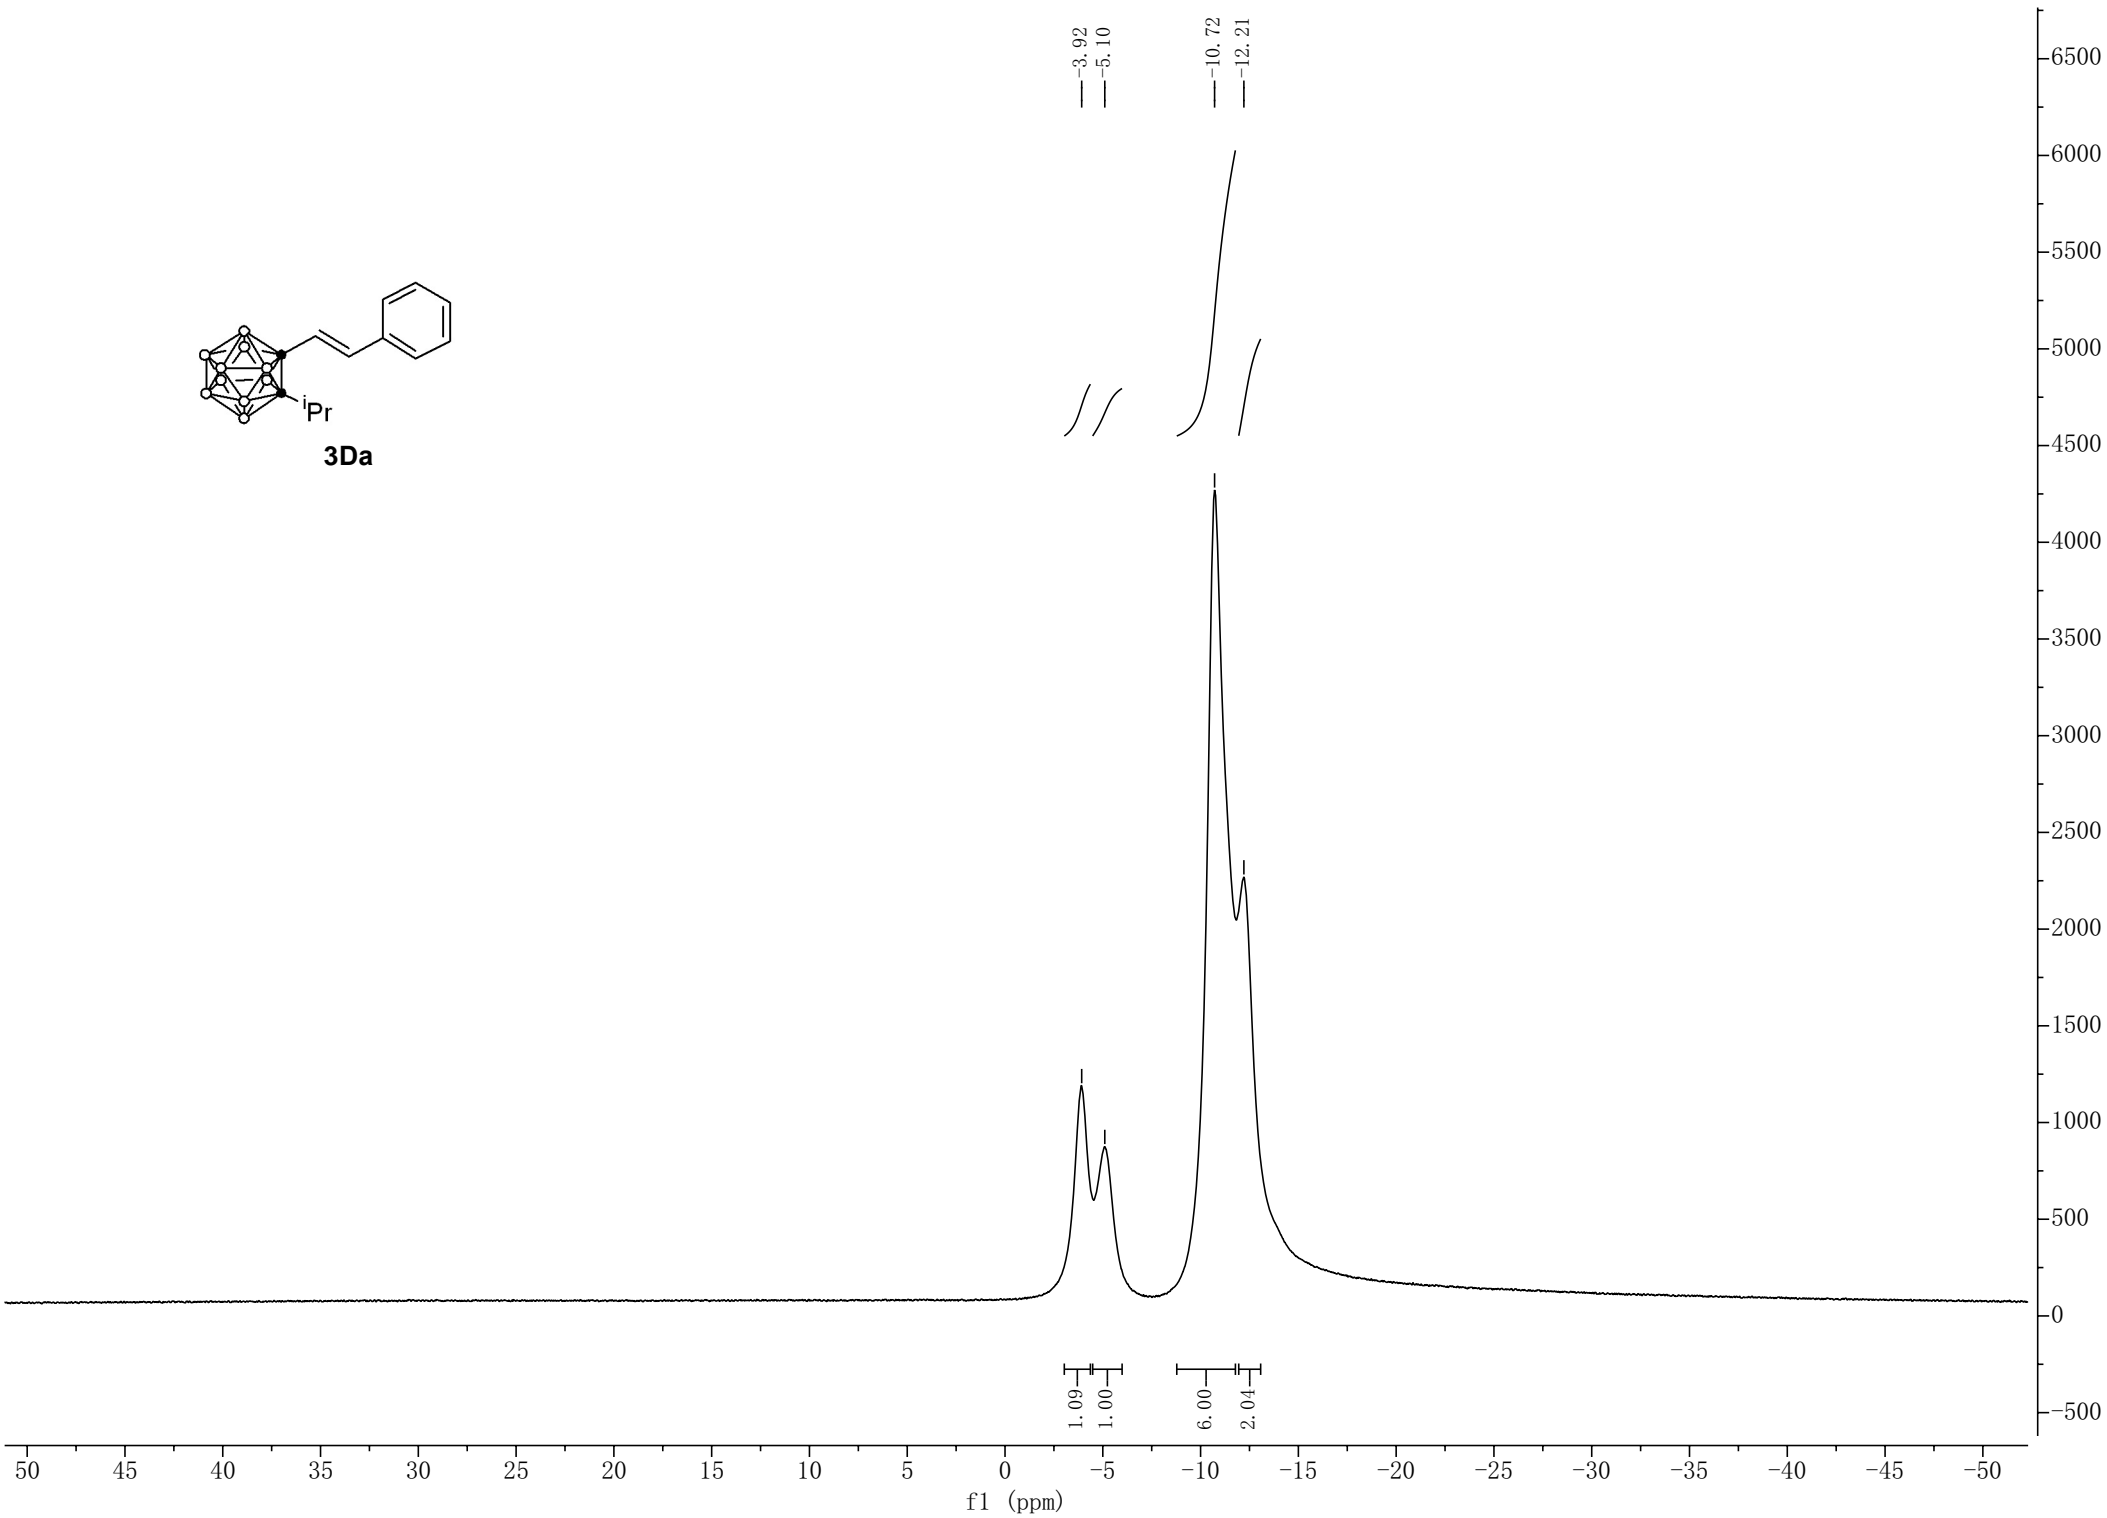

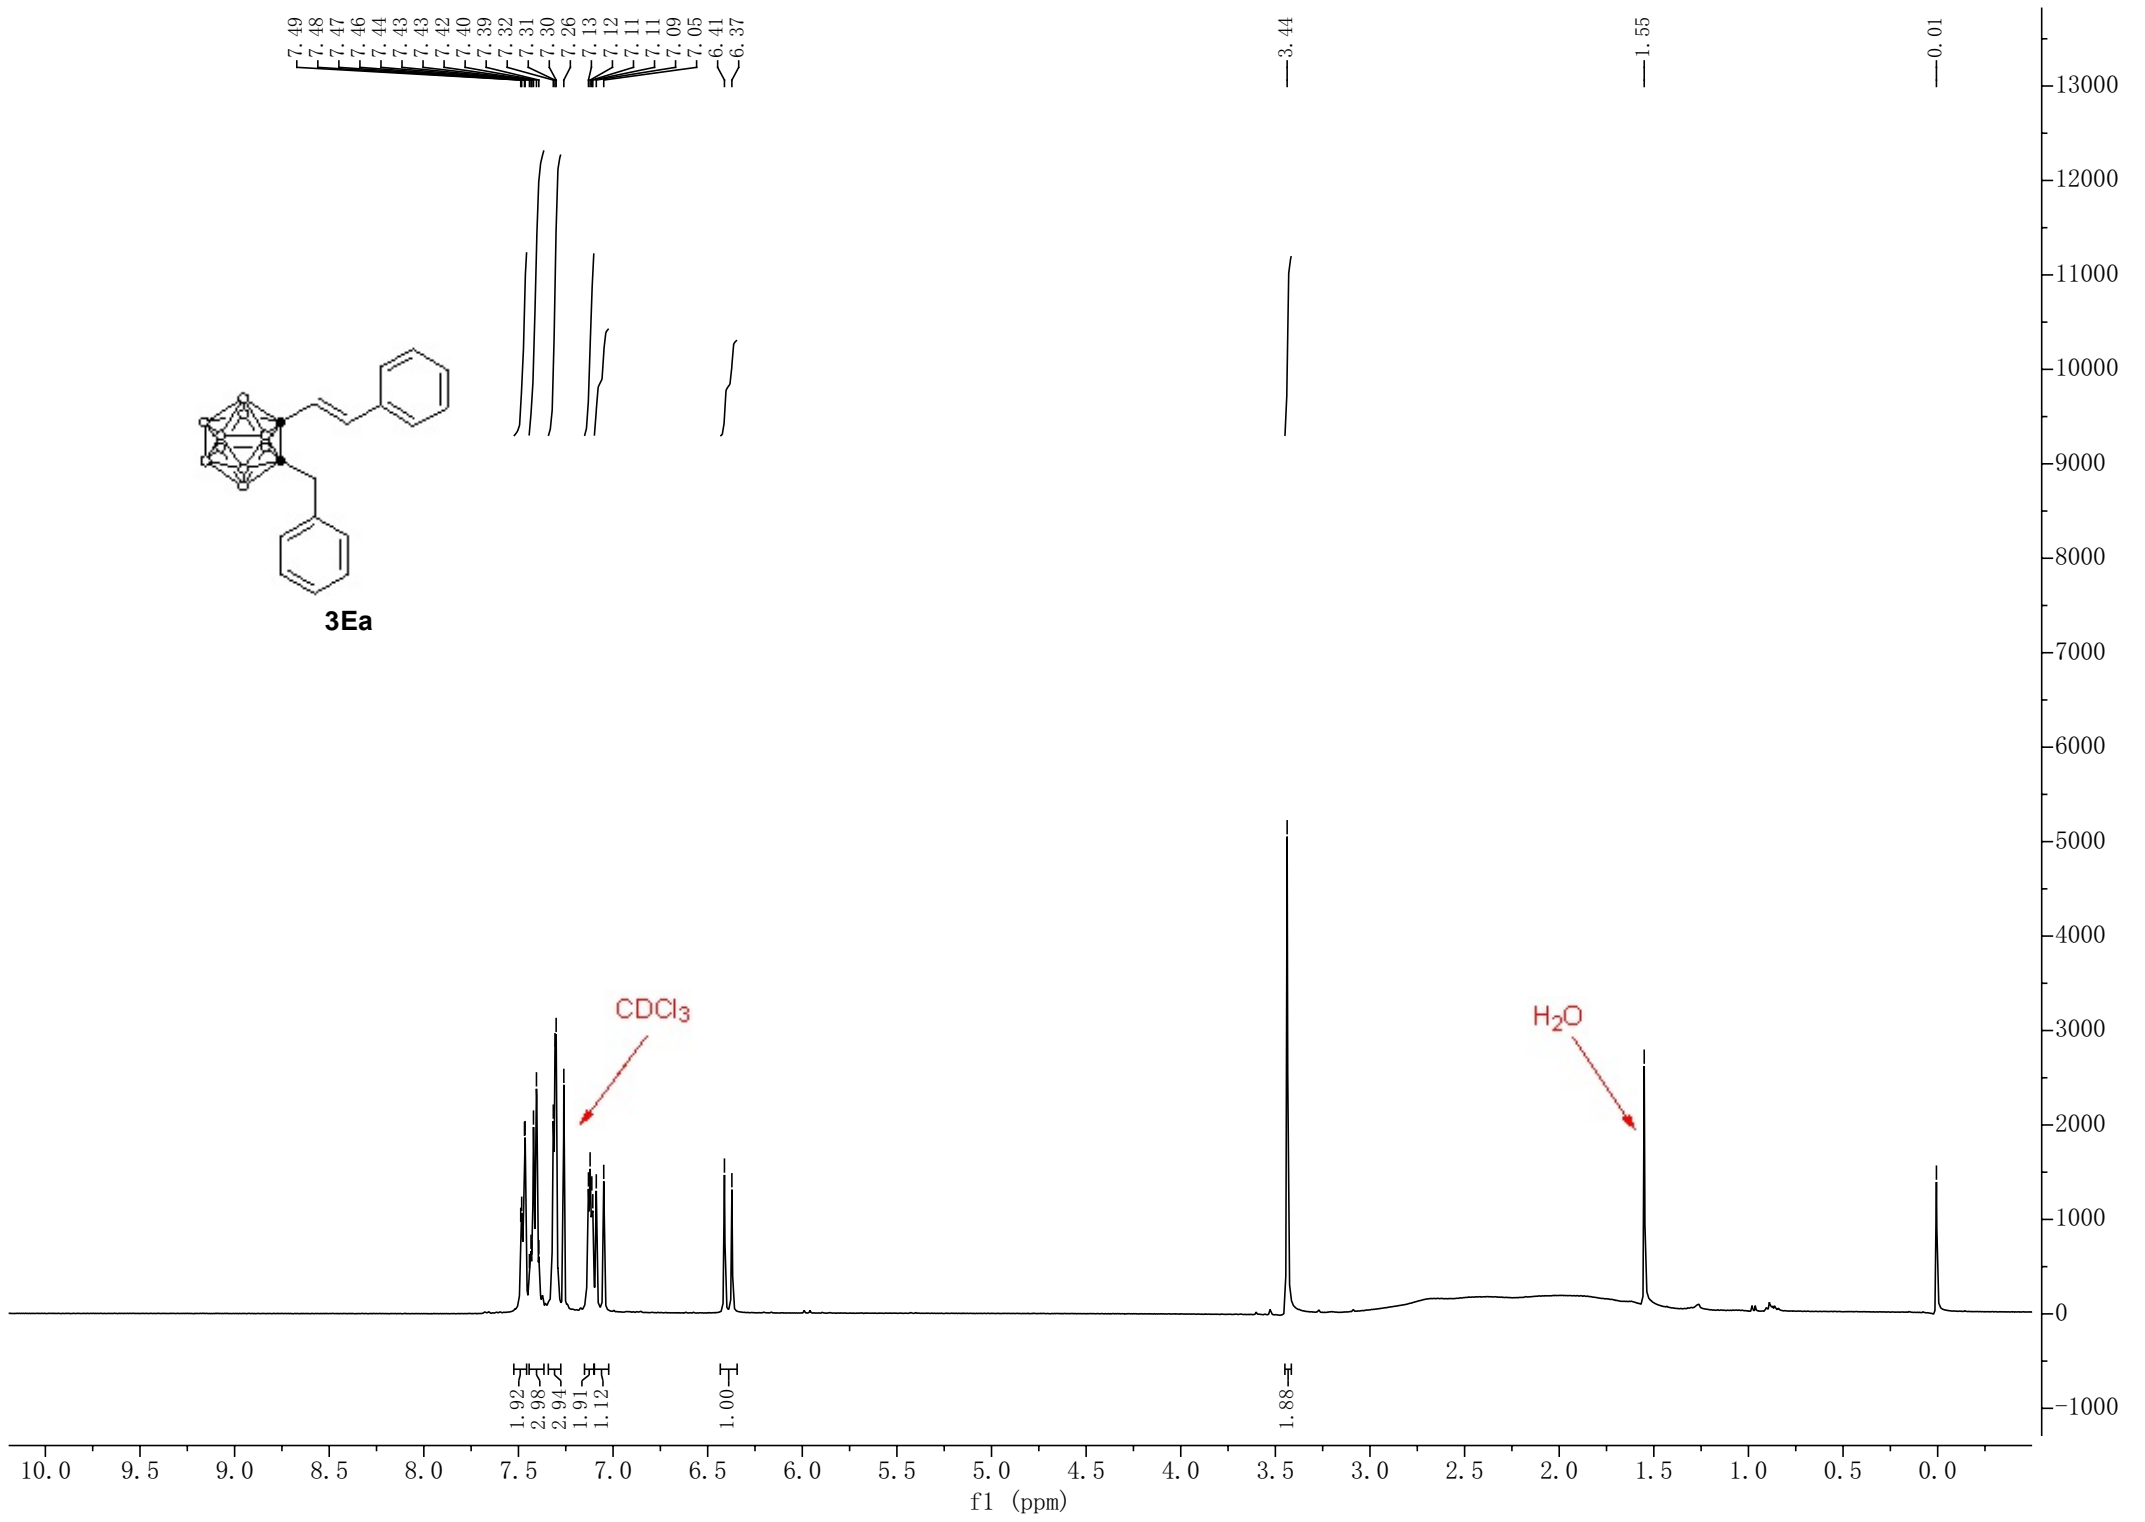

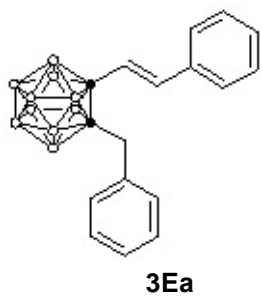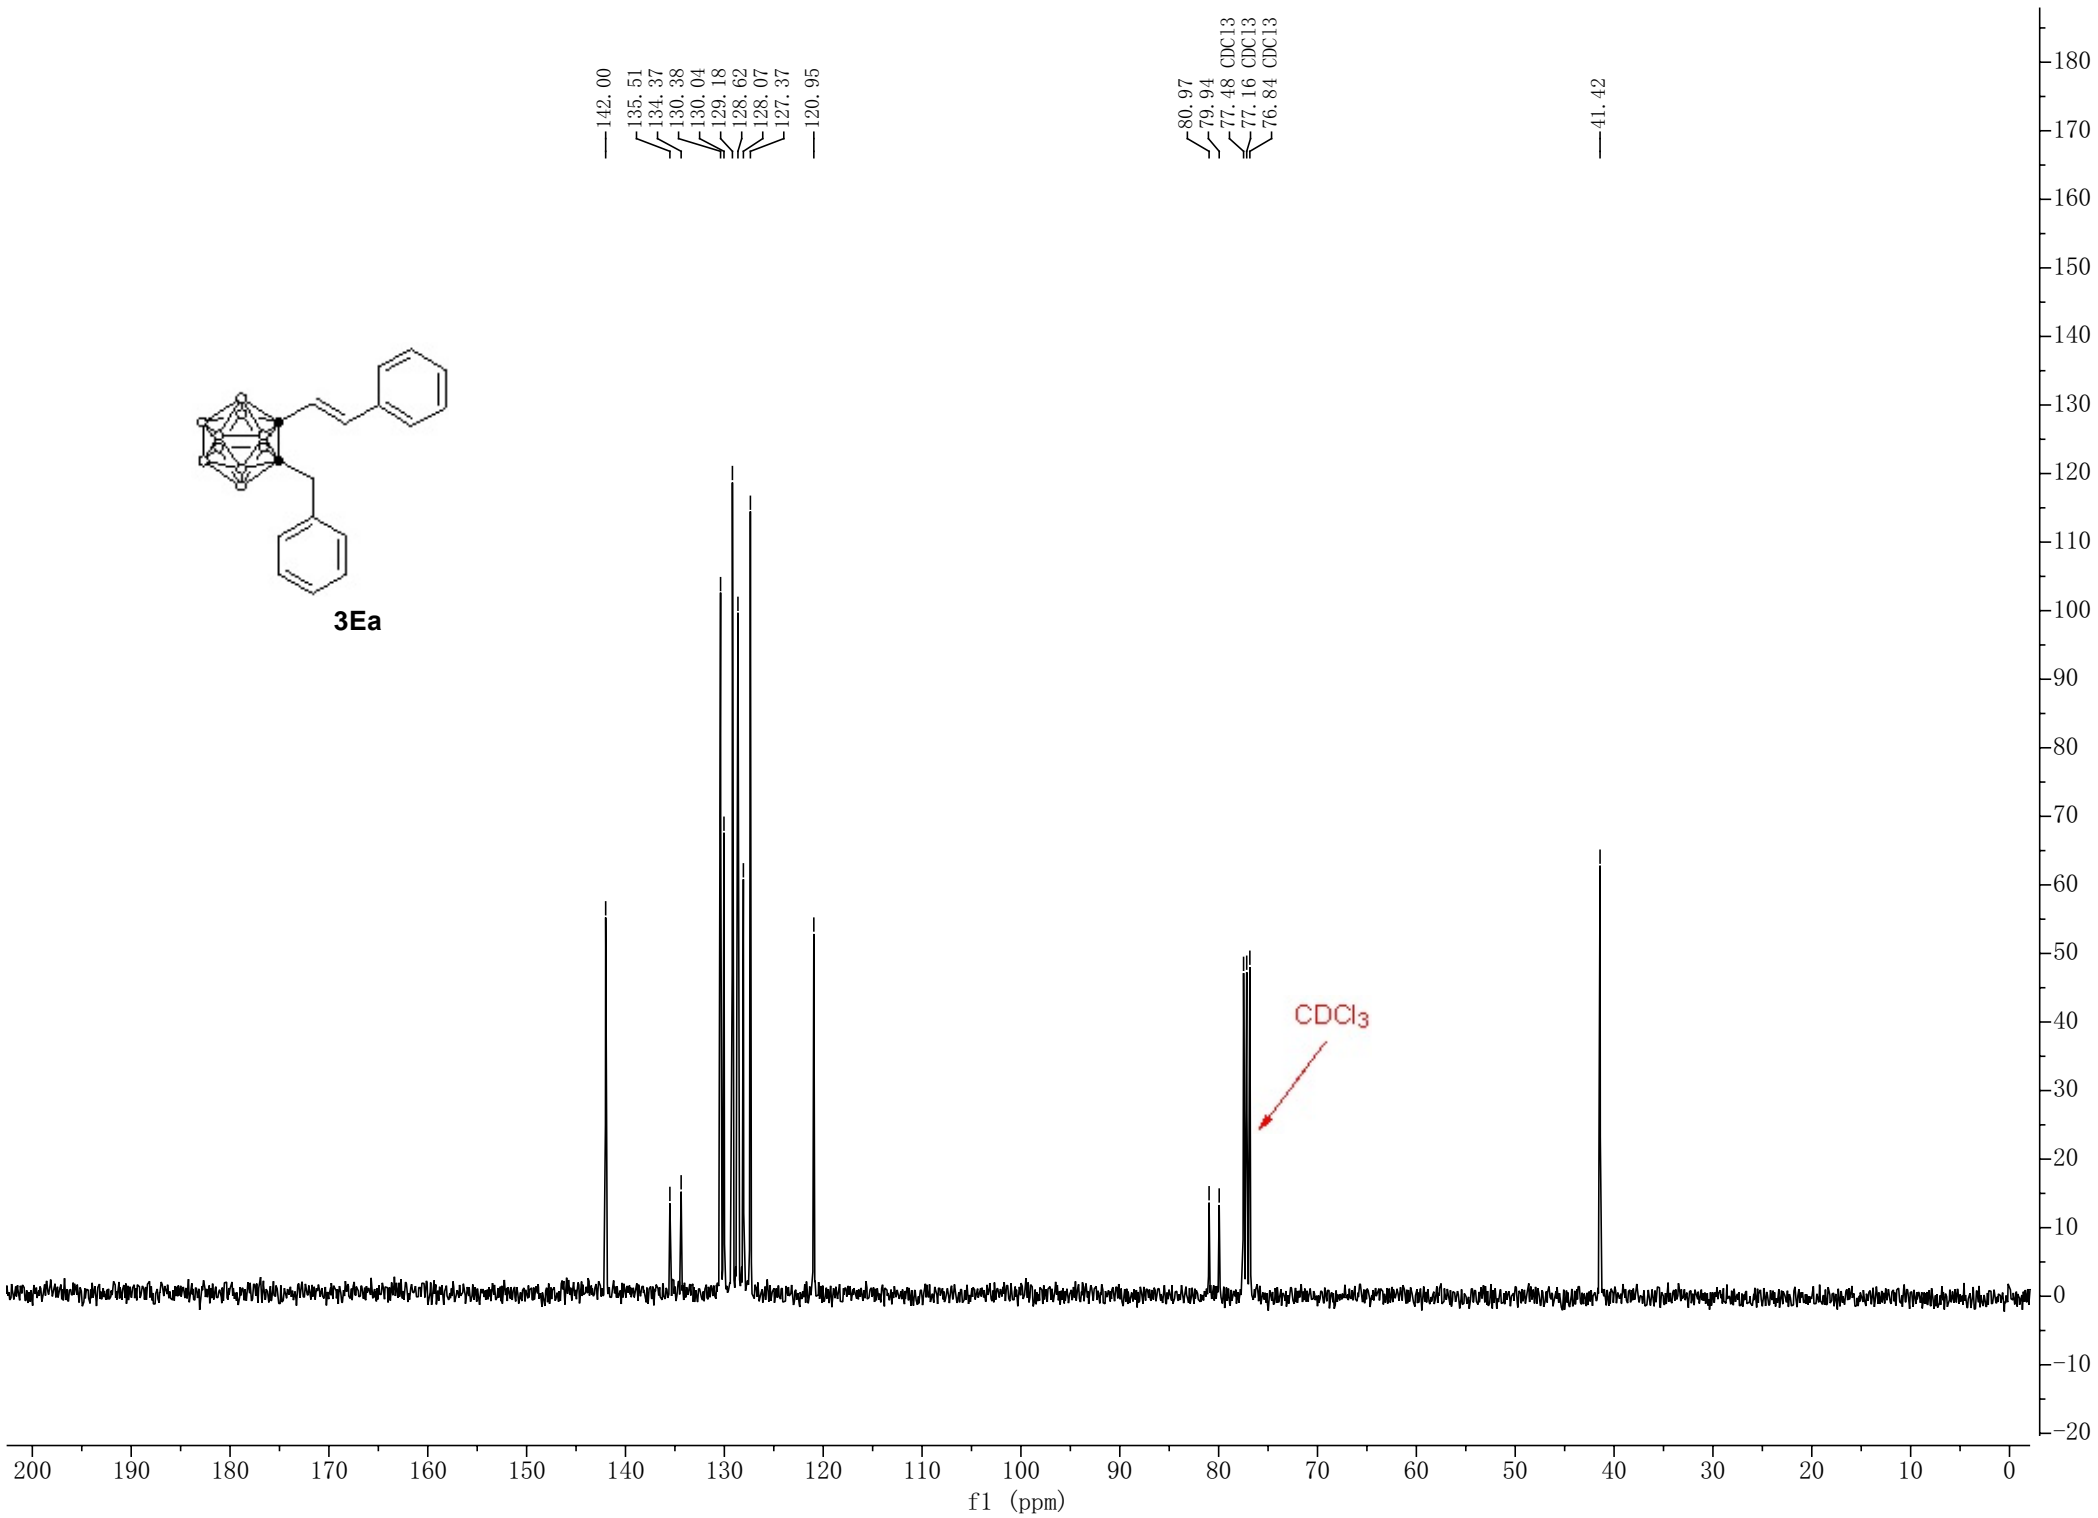

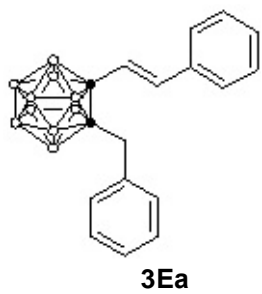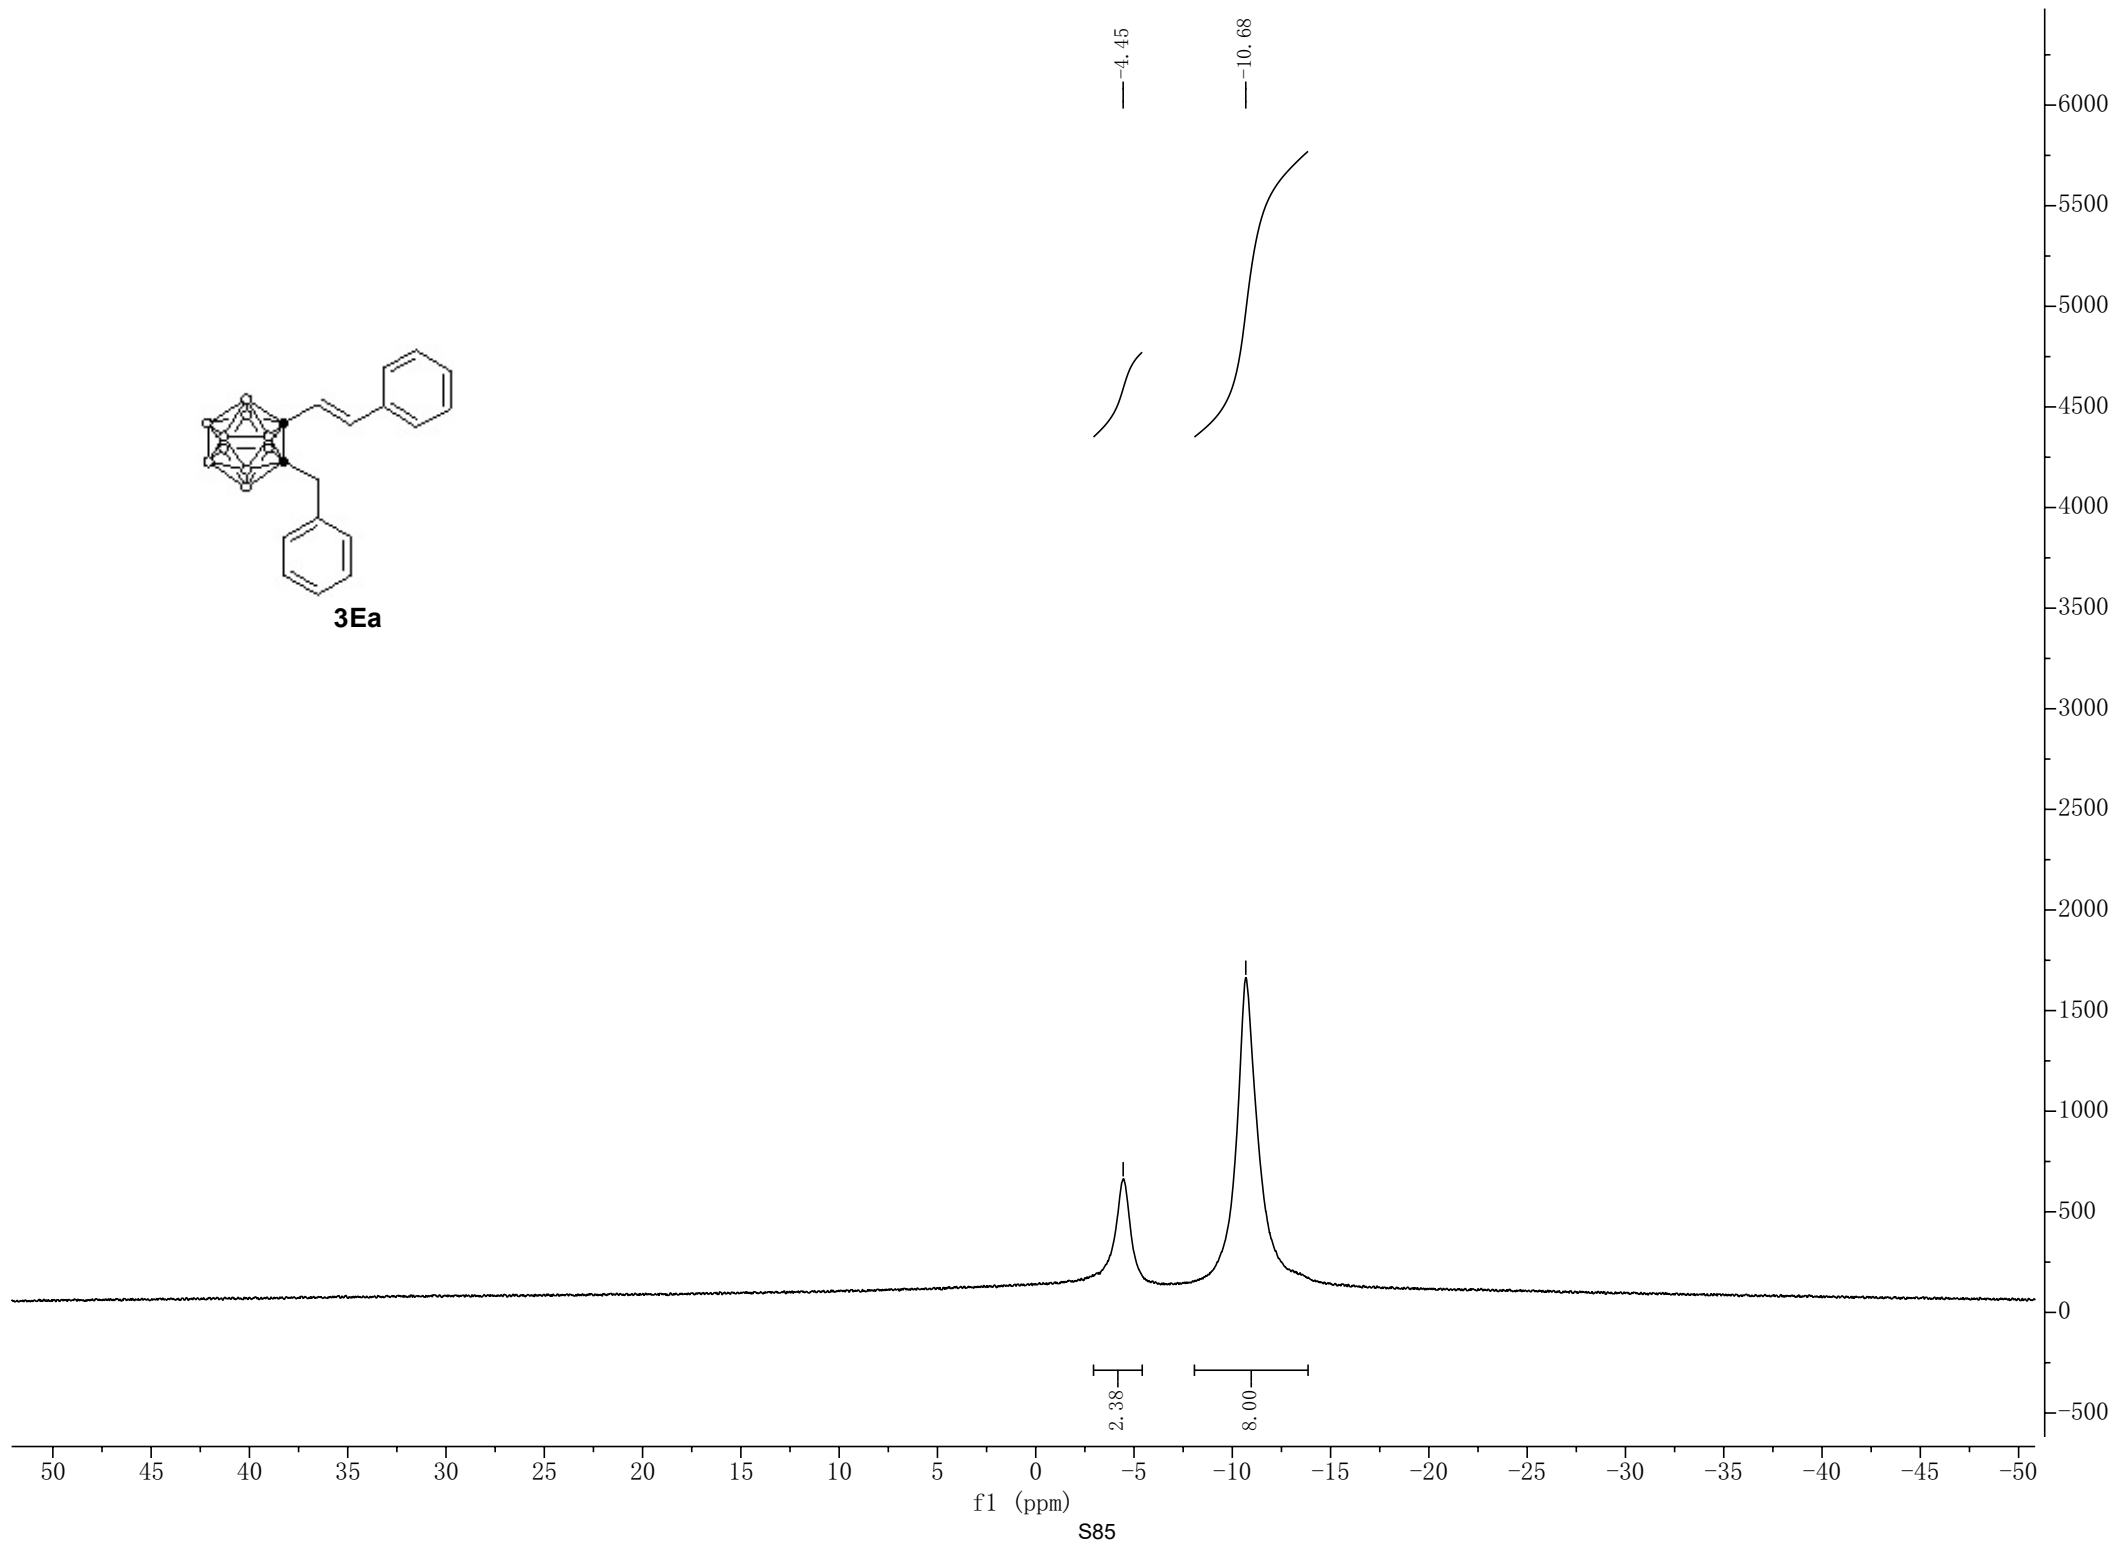

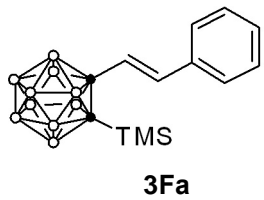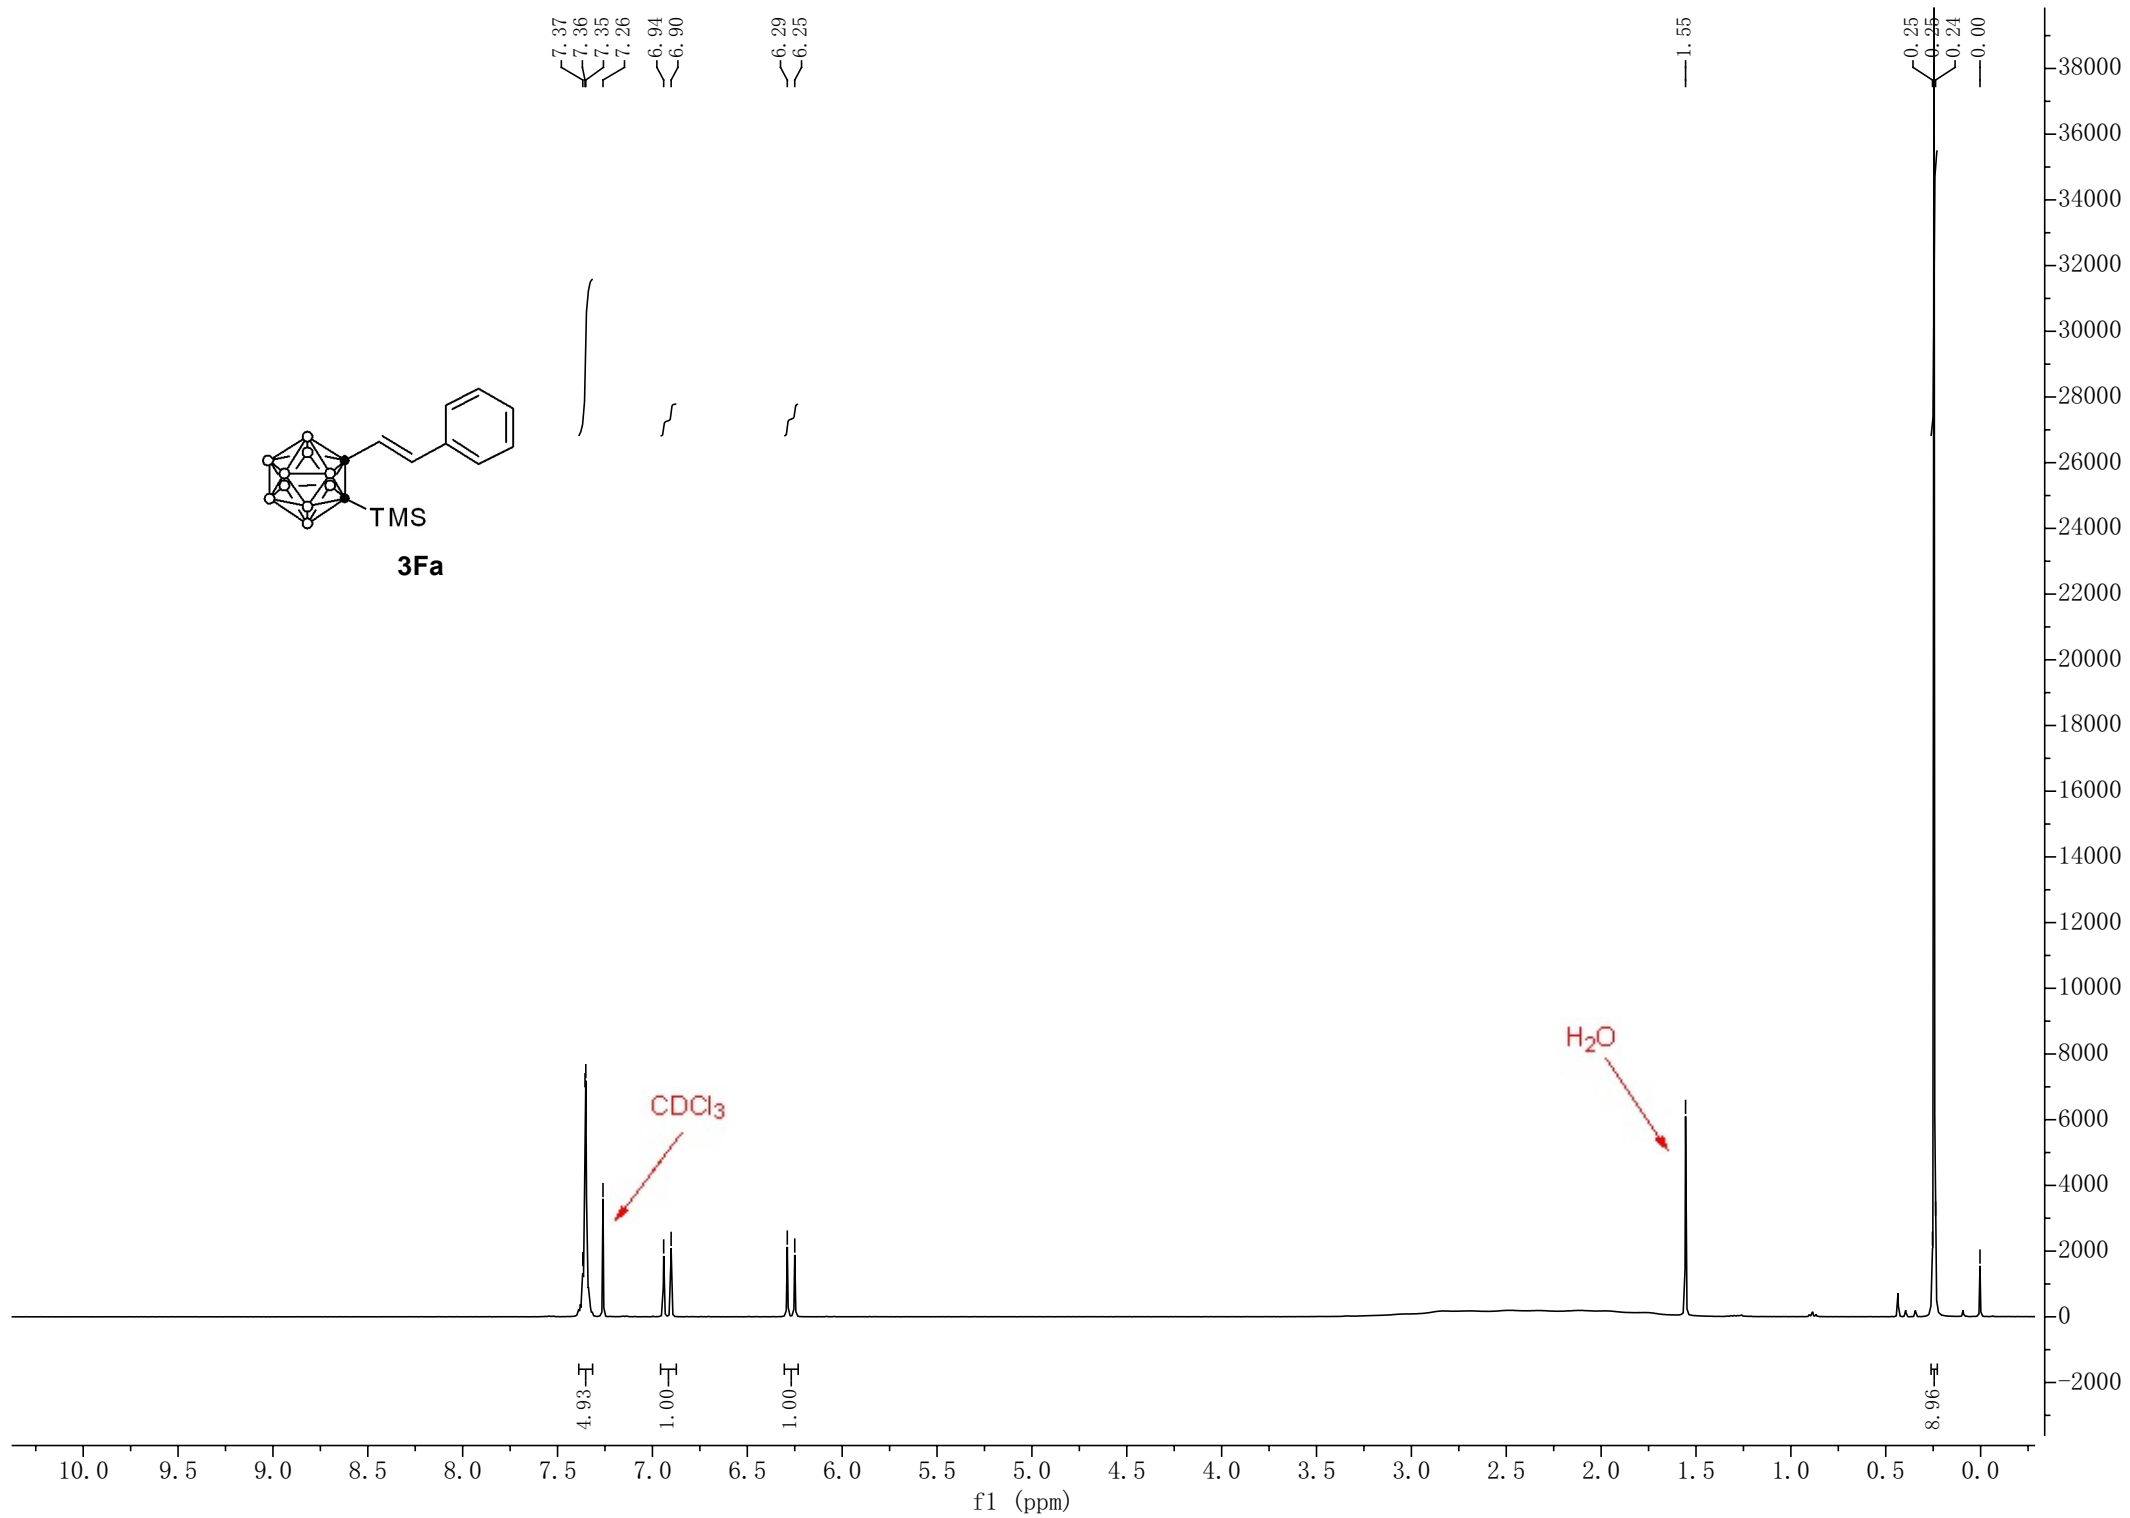

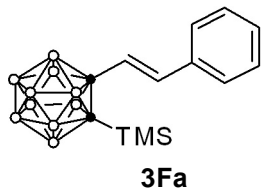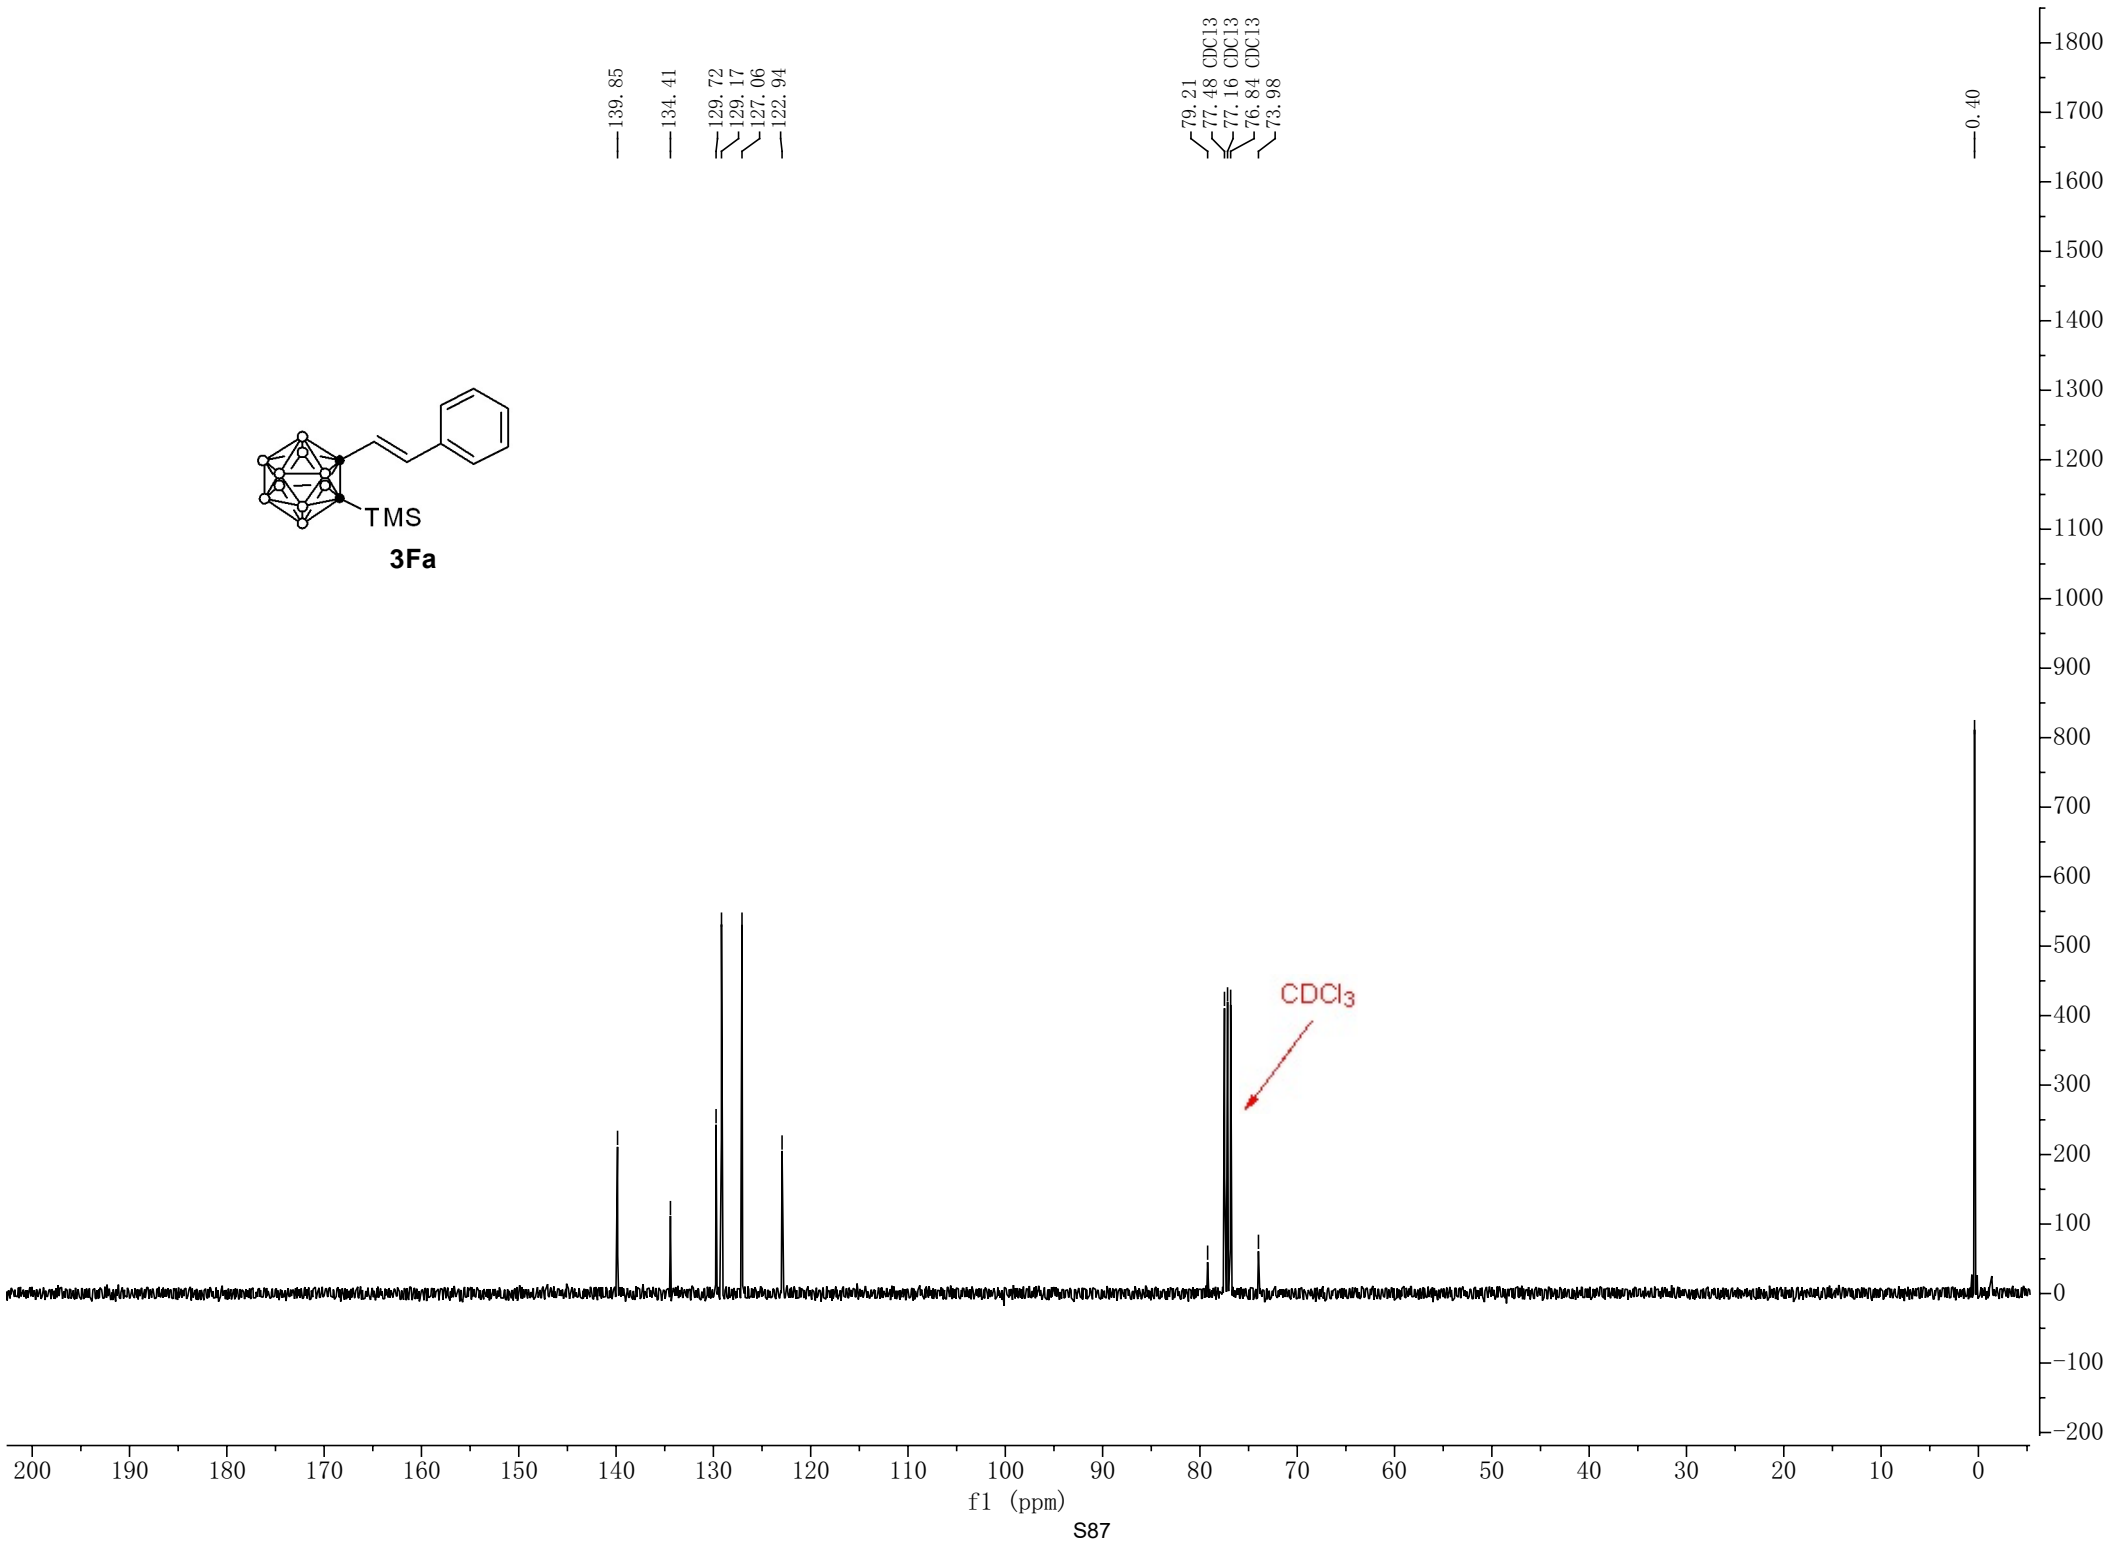

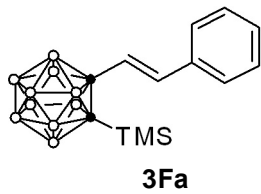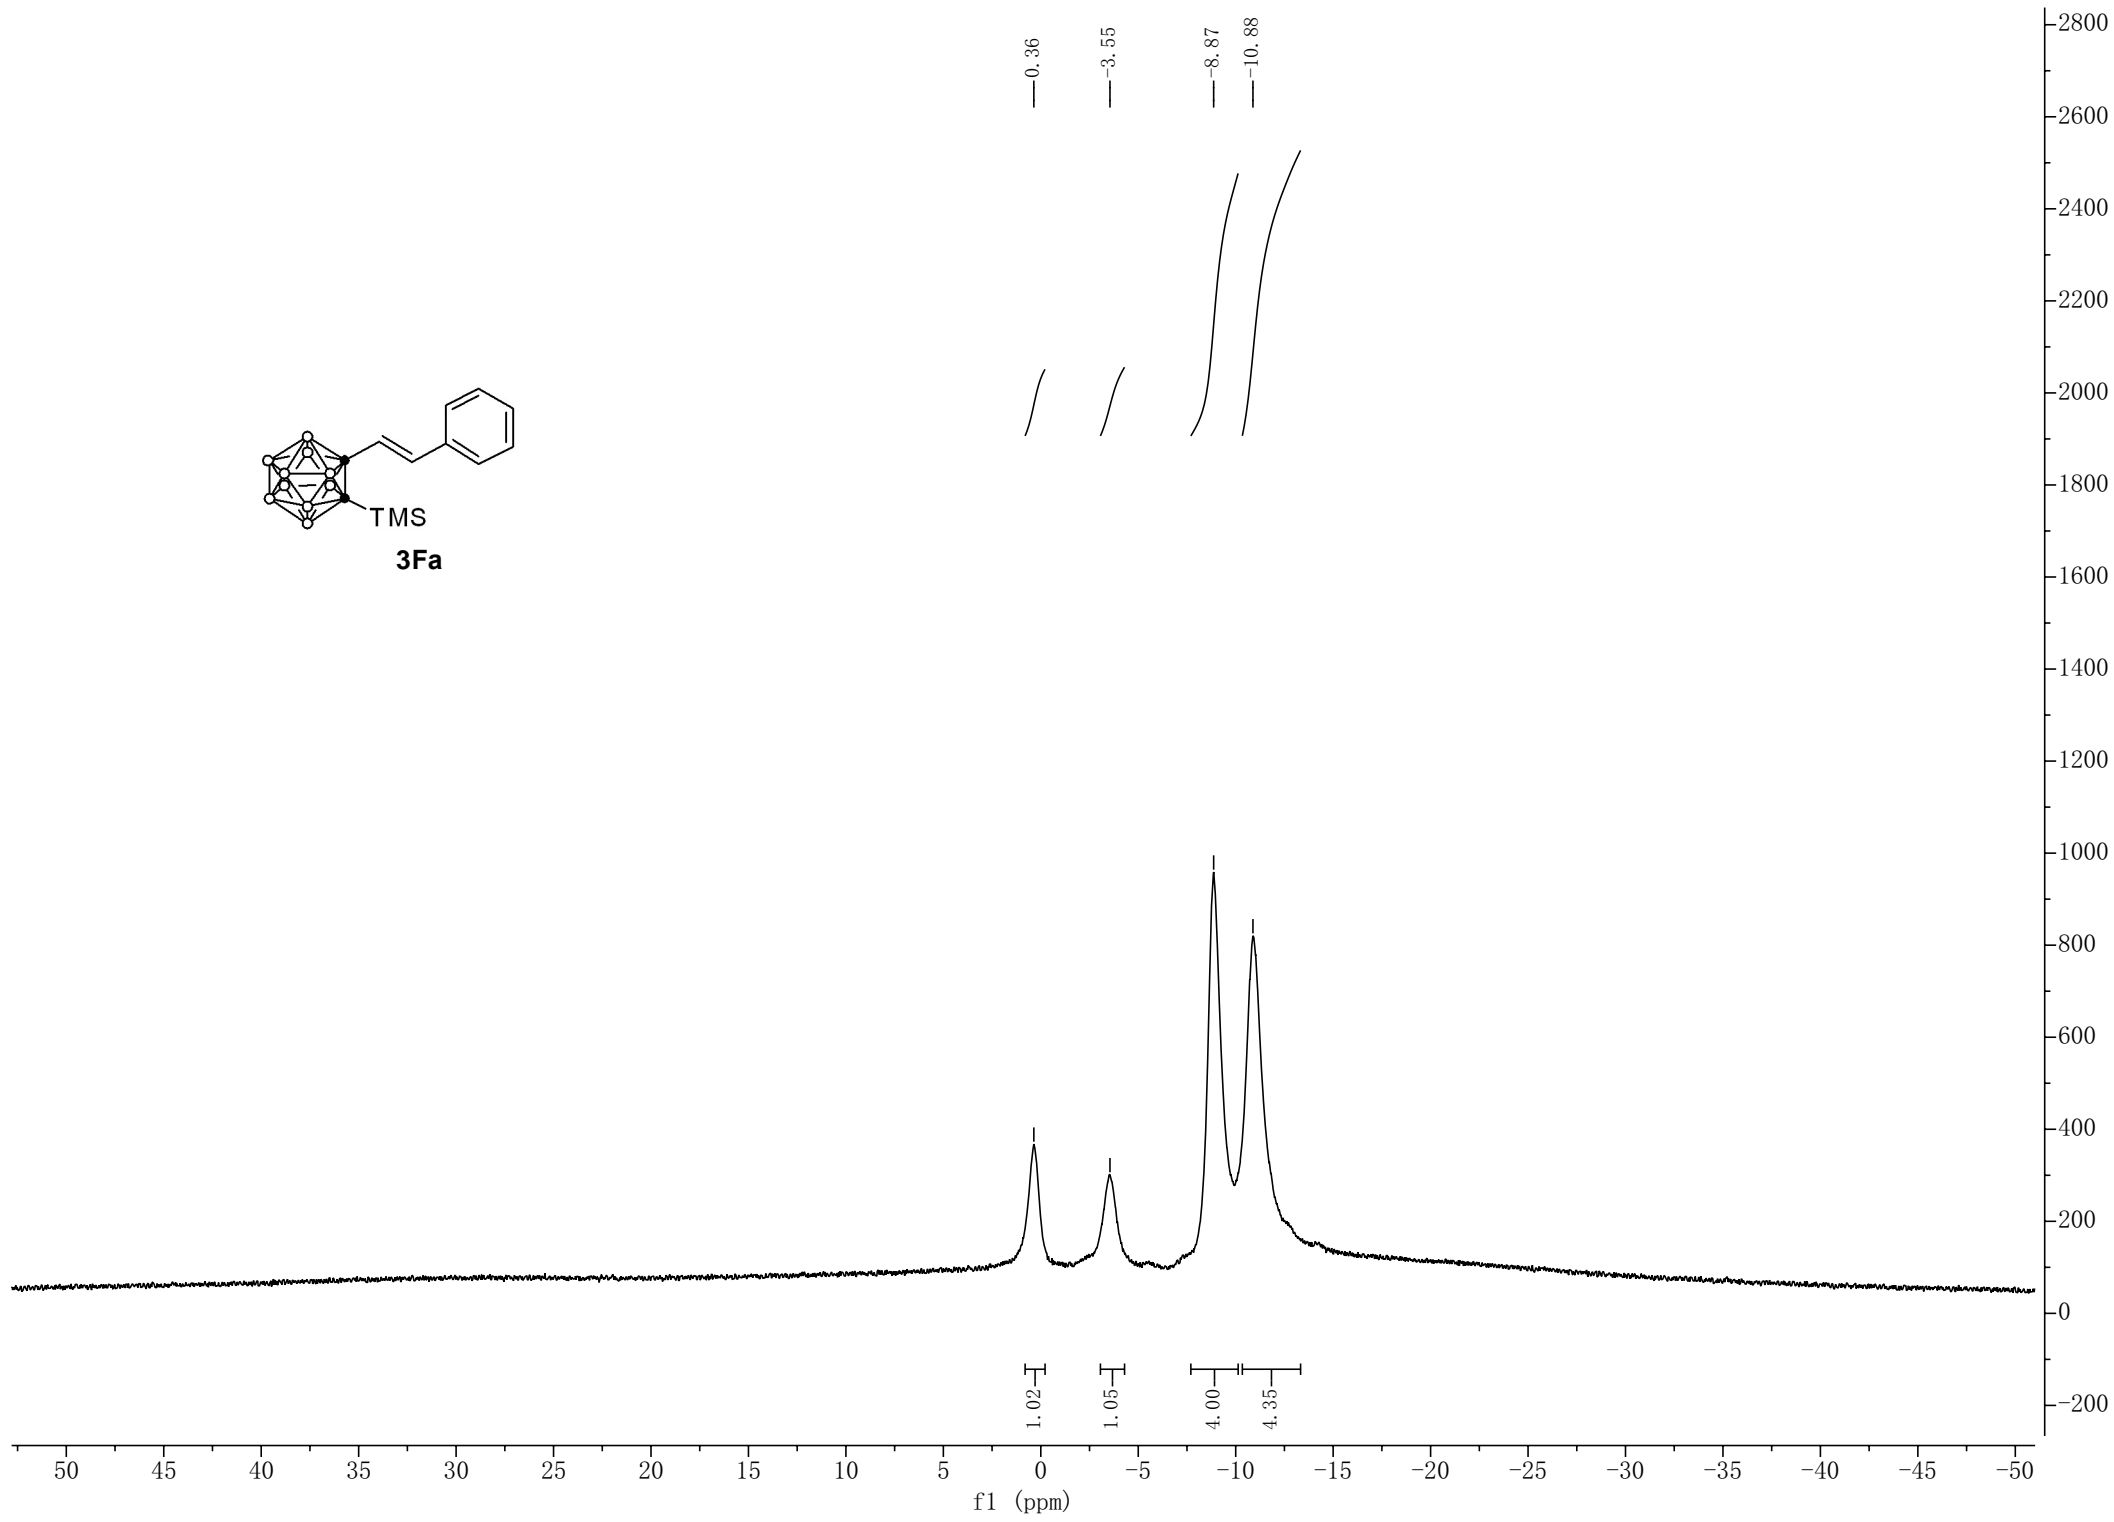



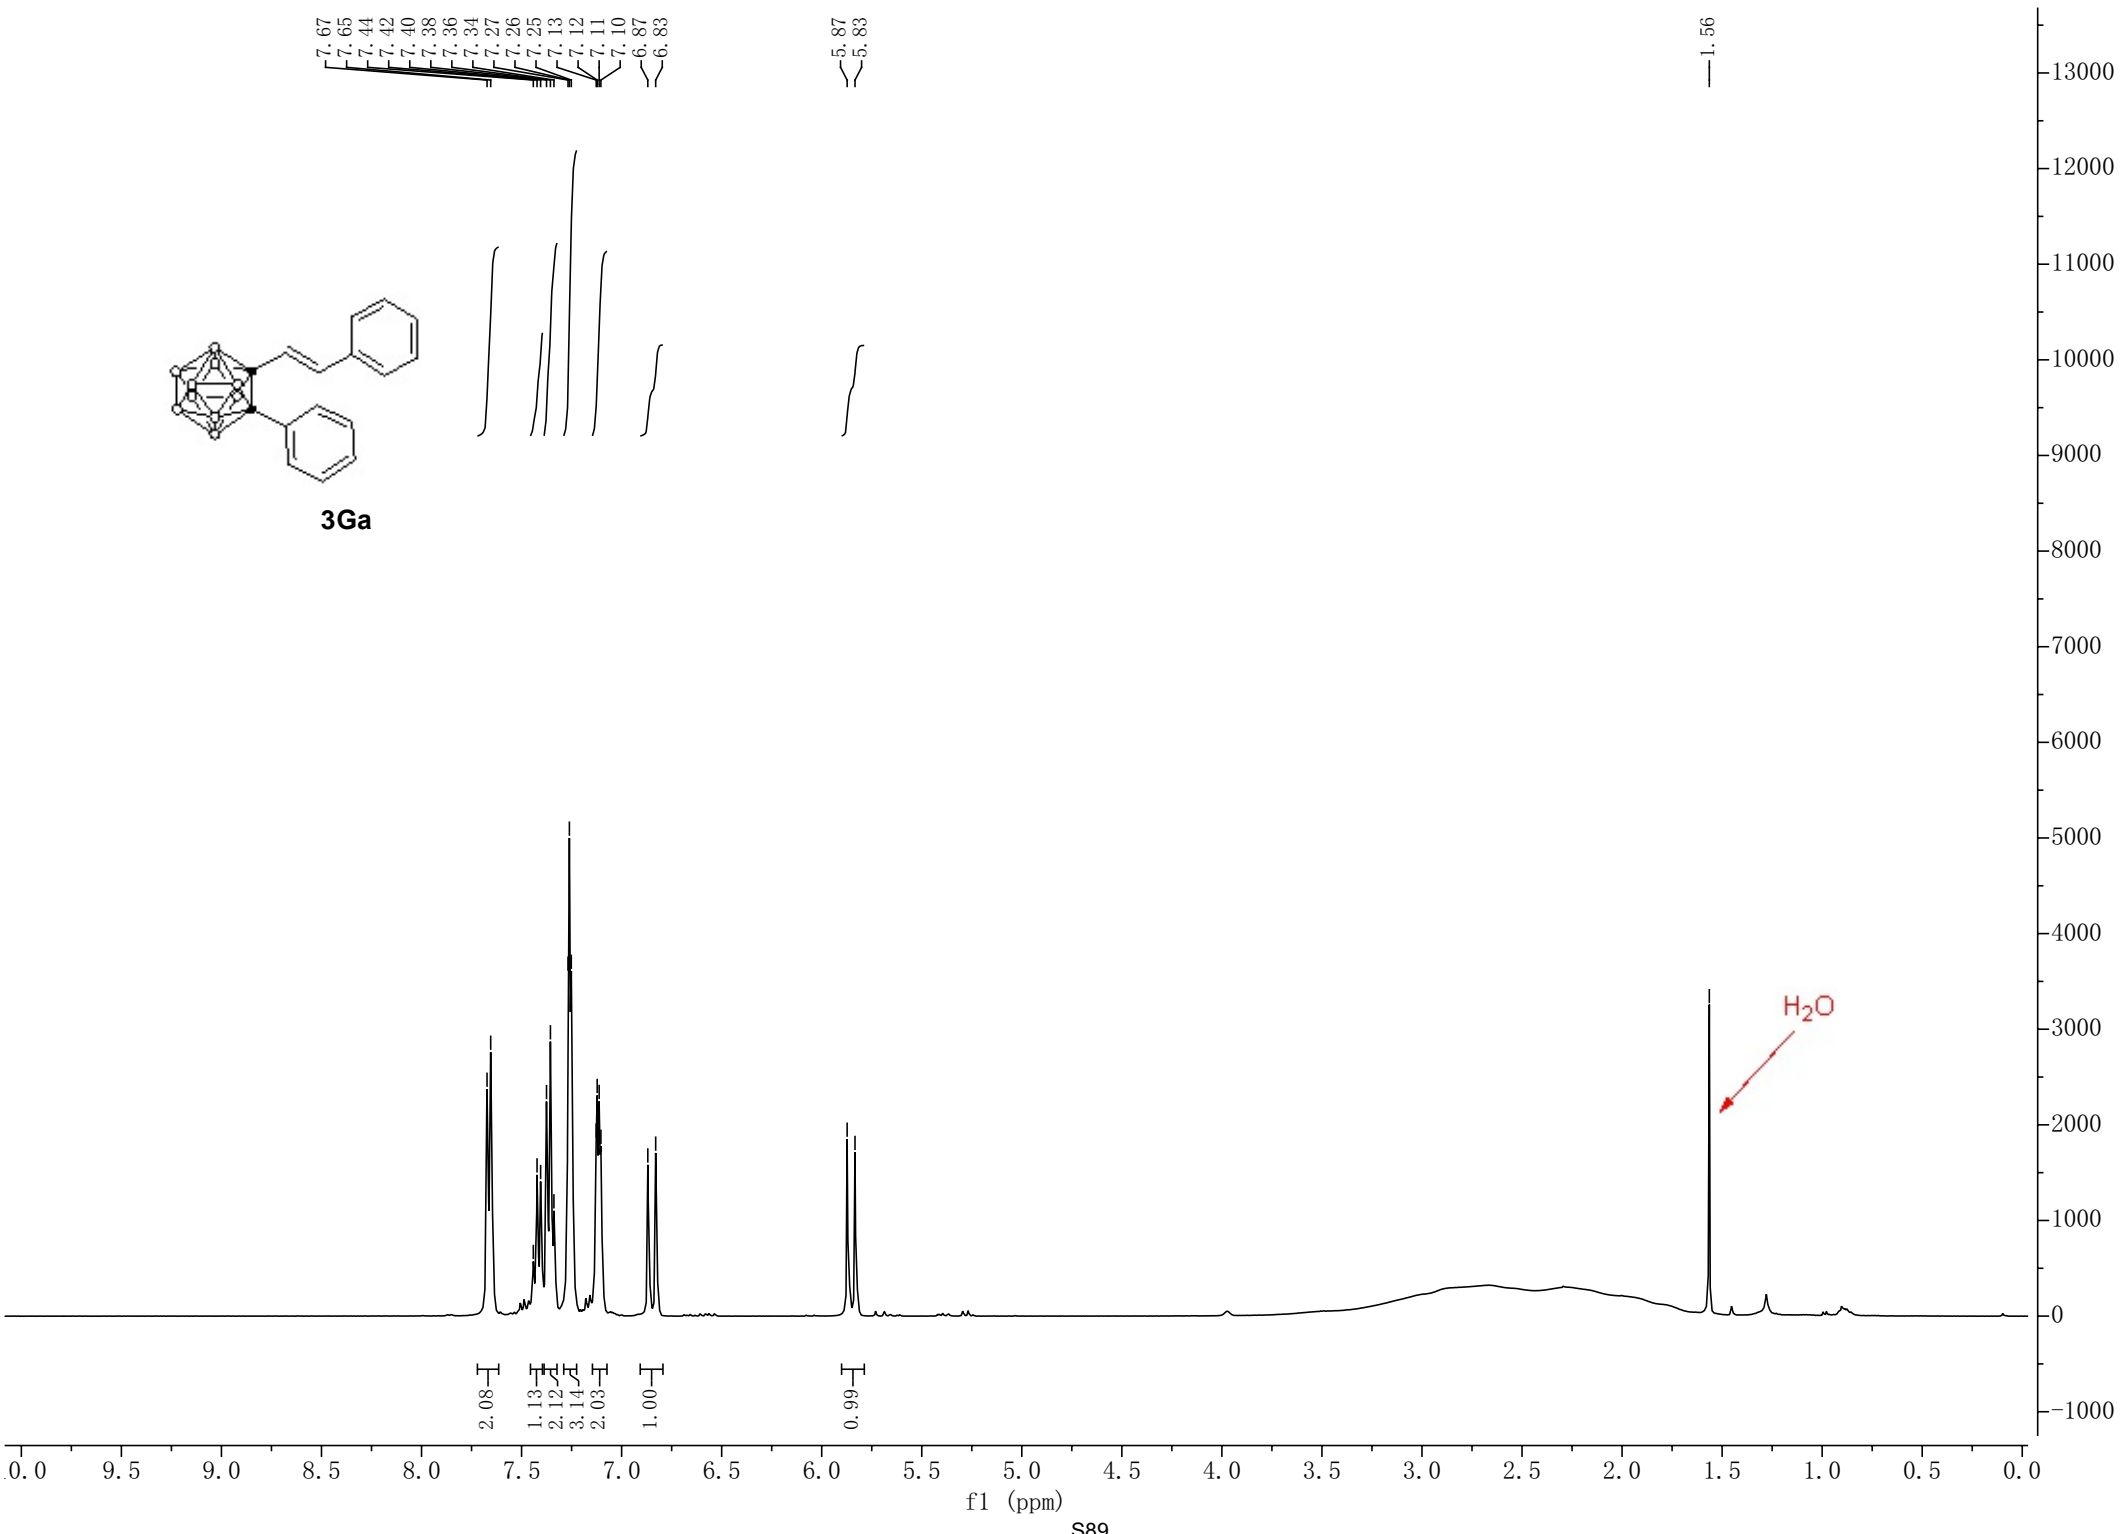

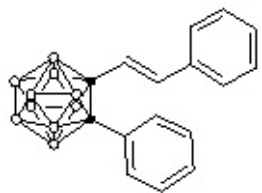

**3Ga**

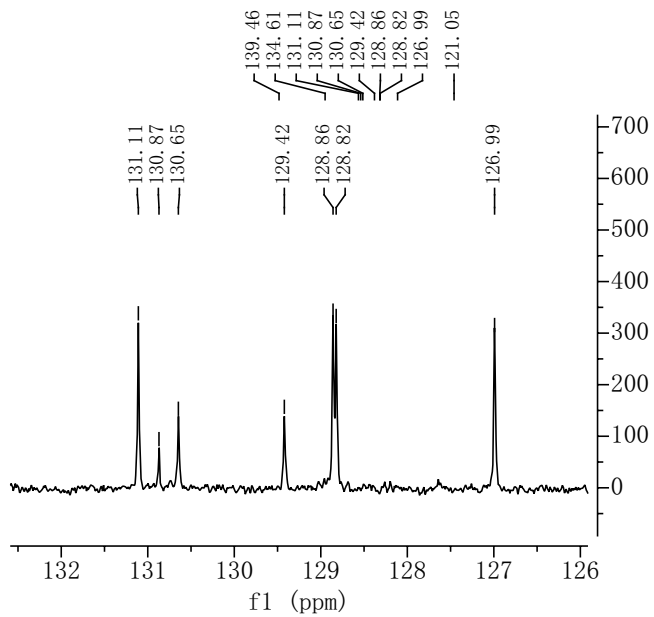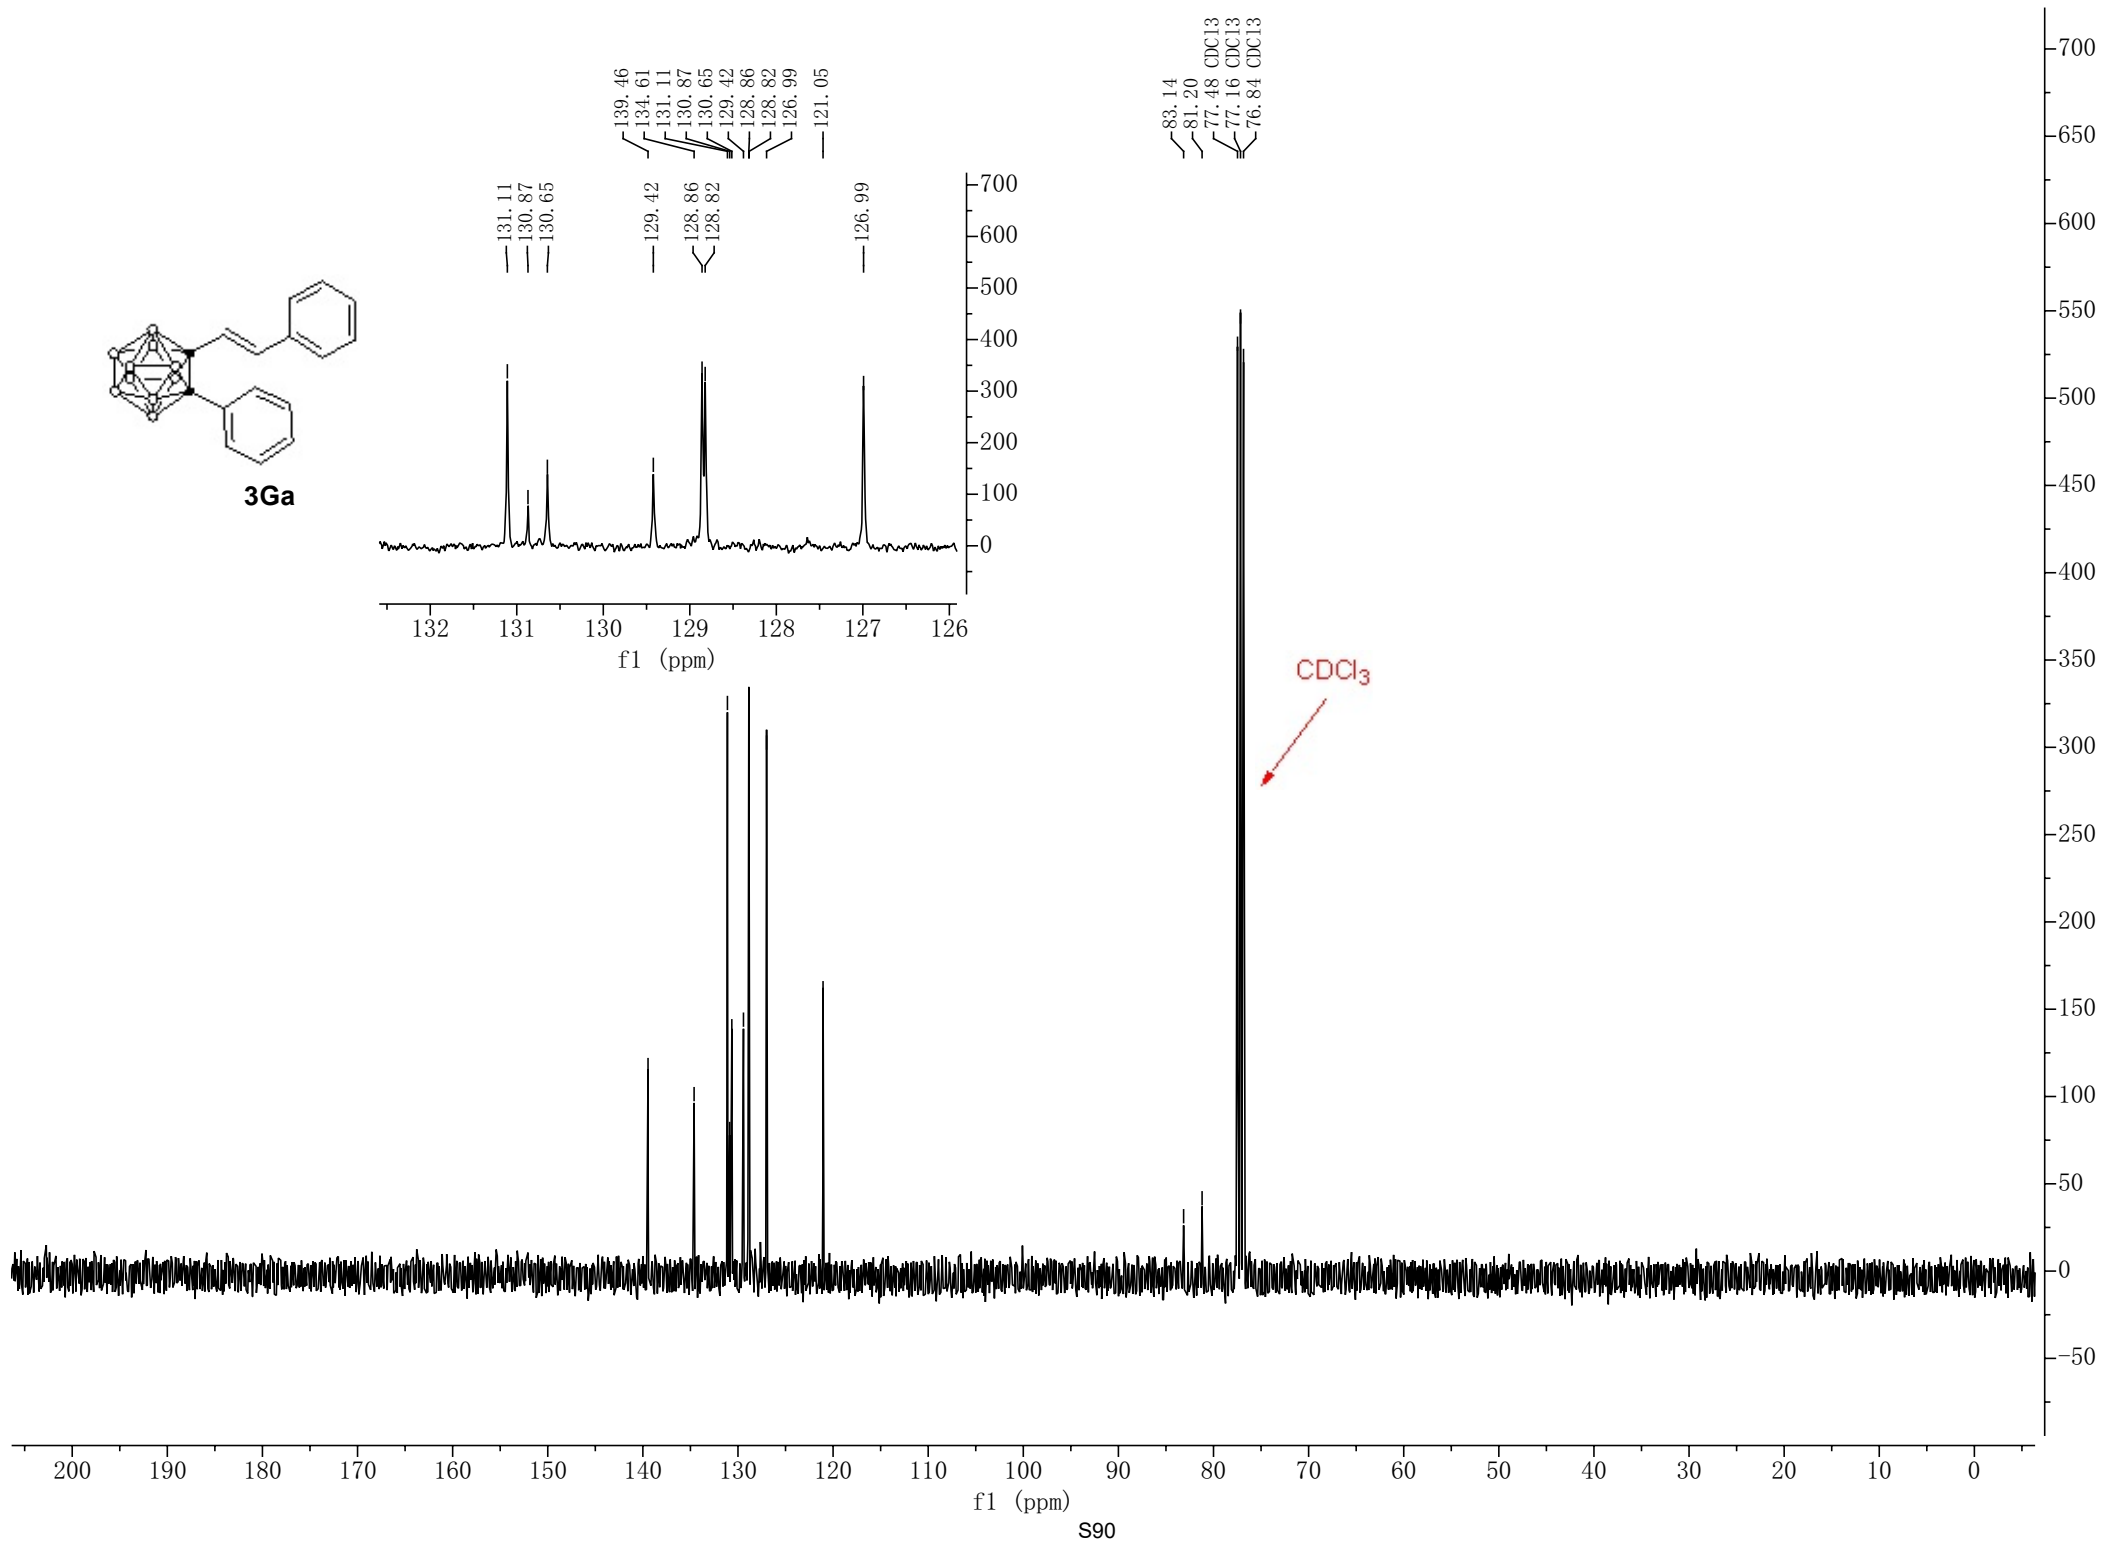

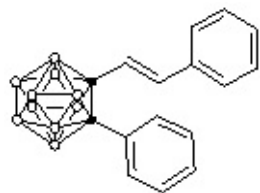

**3Ga**

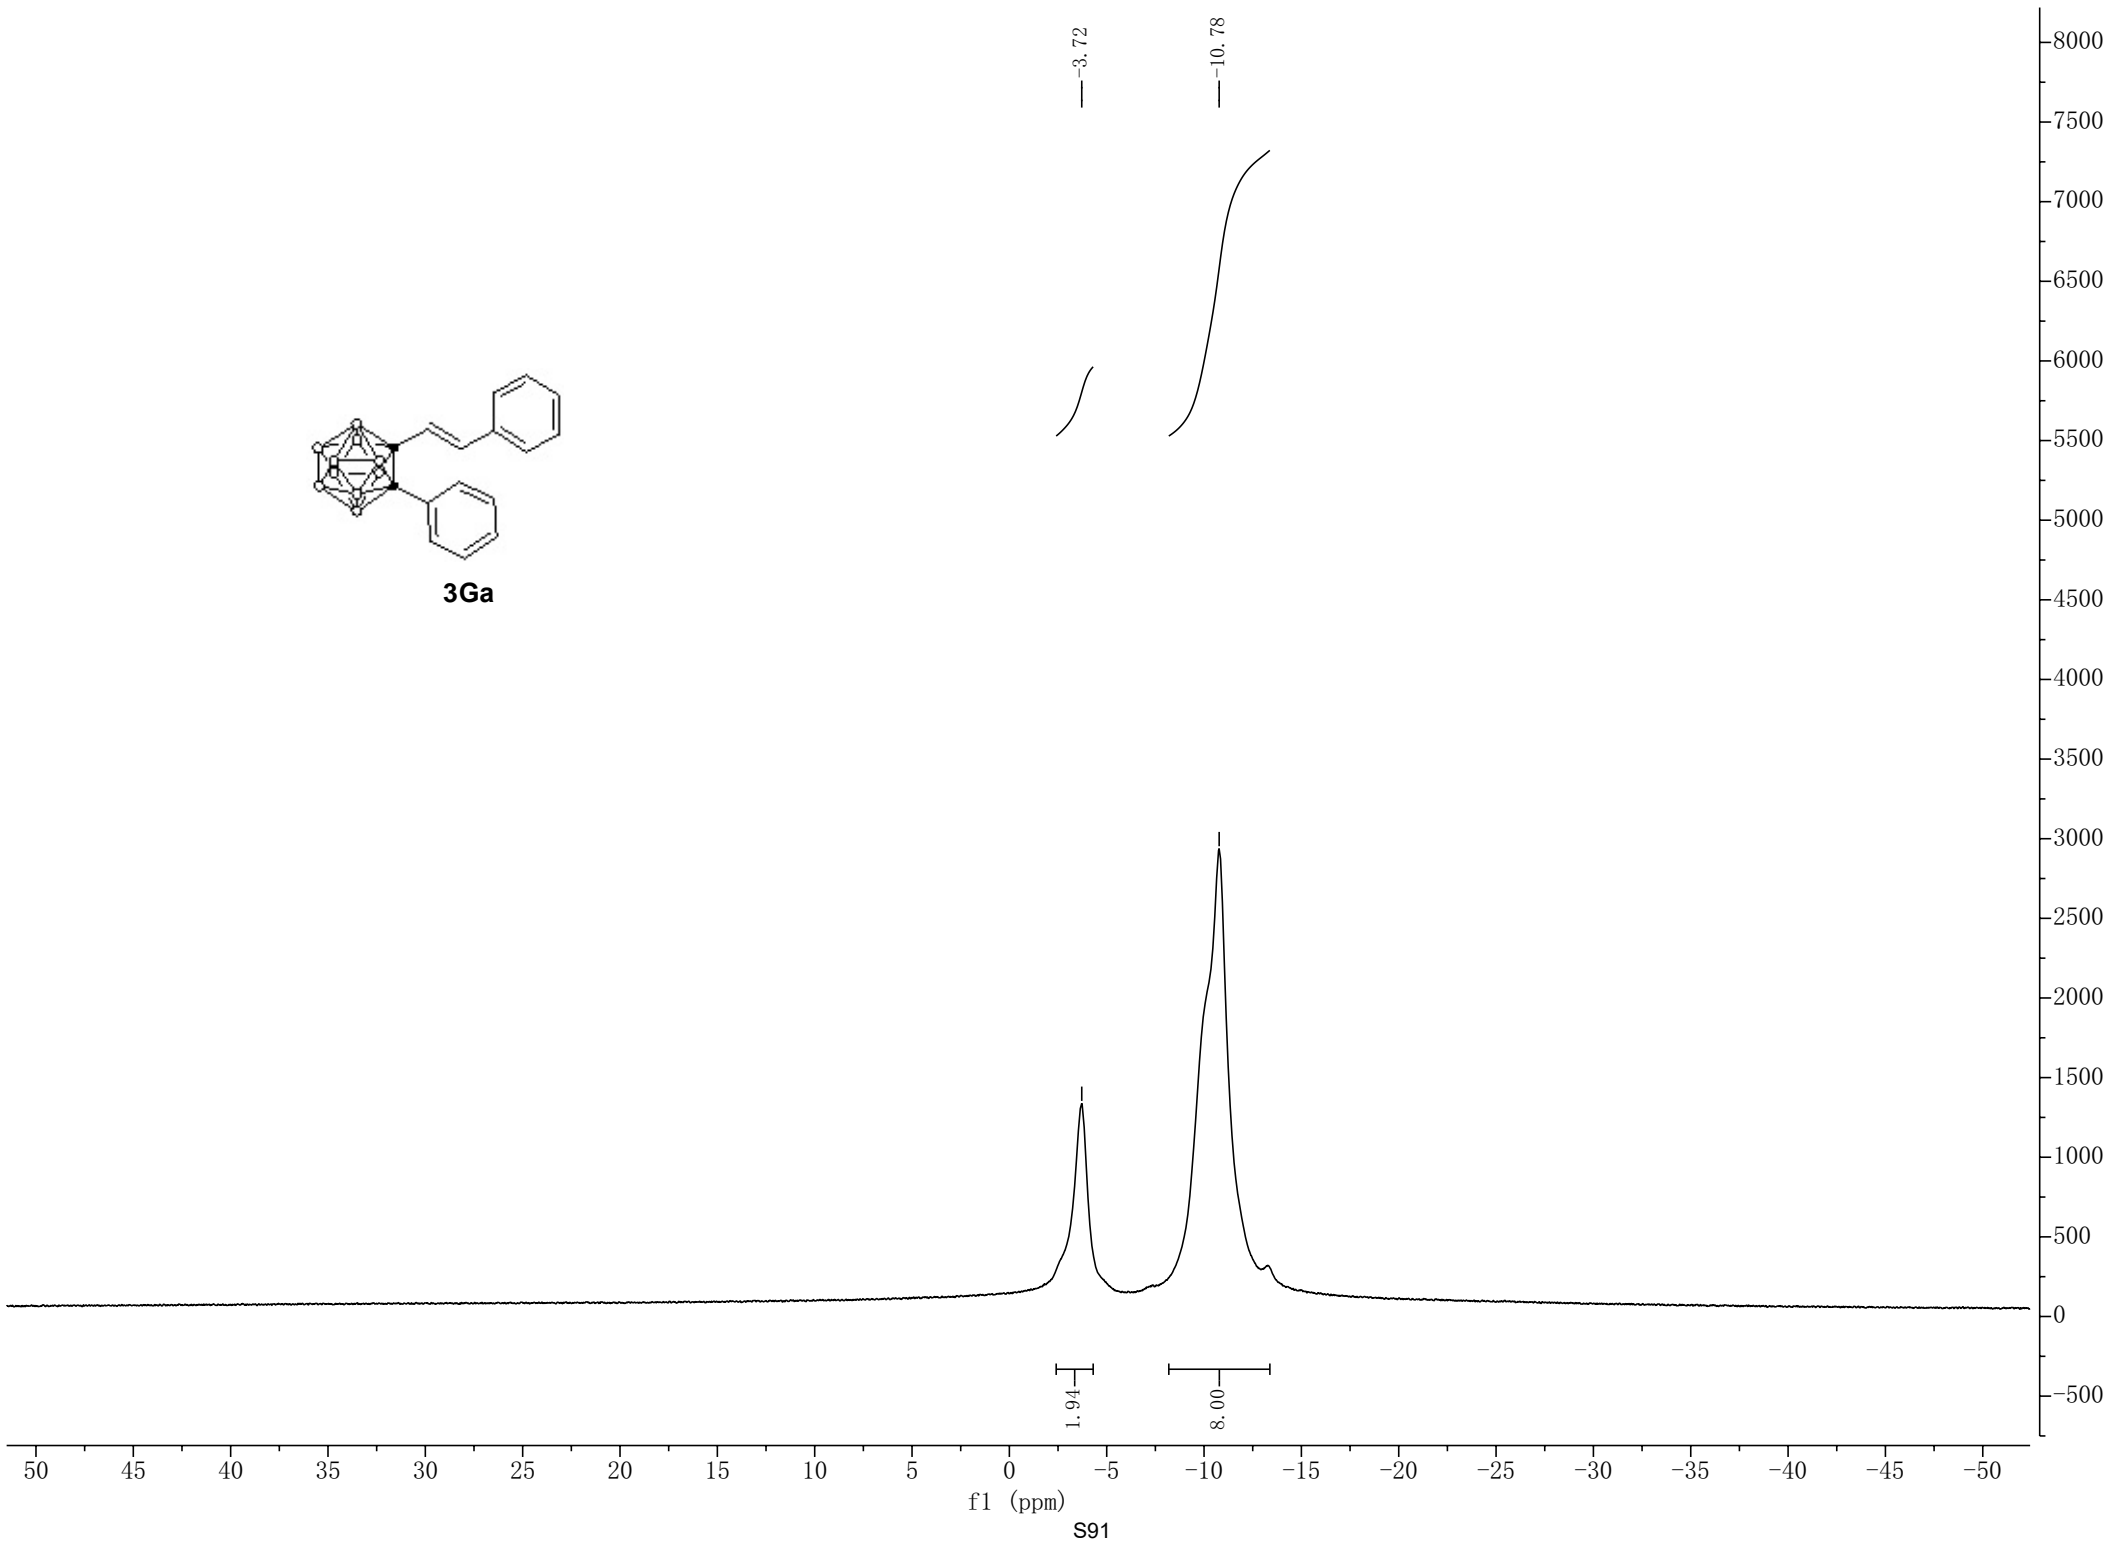

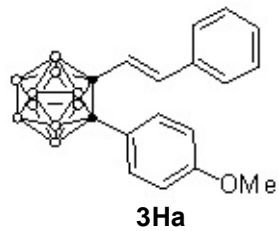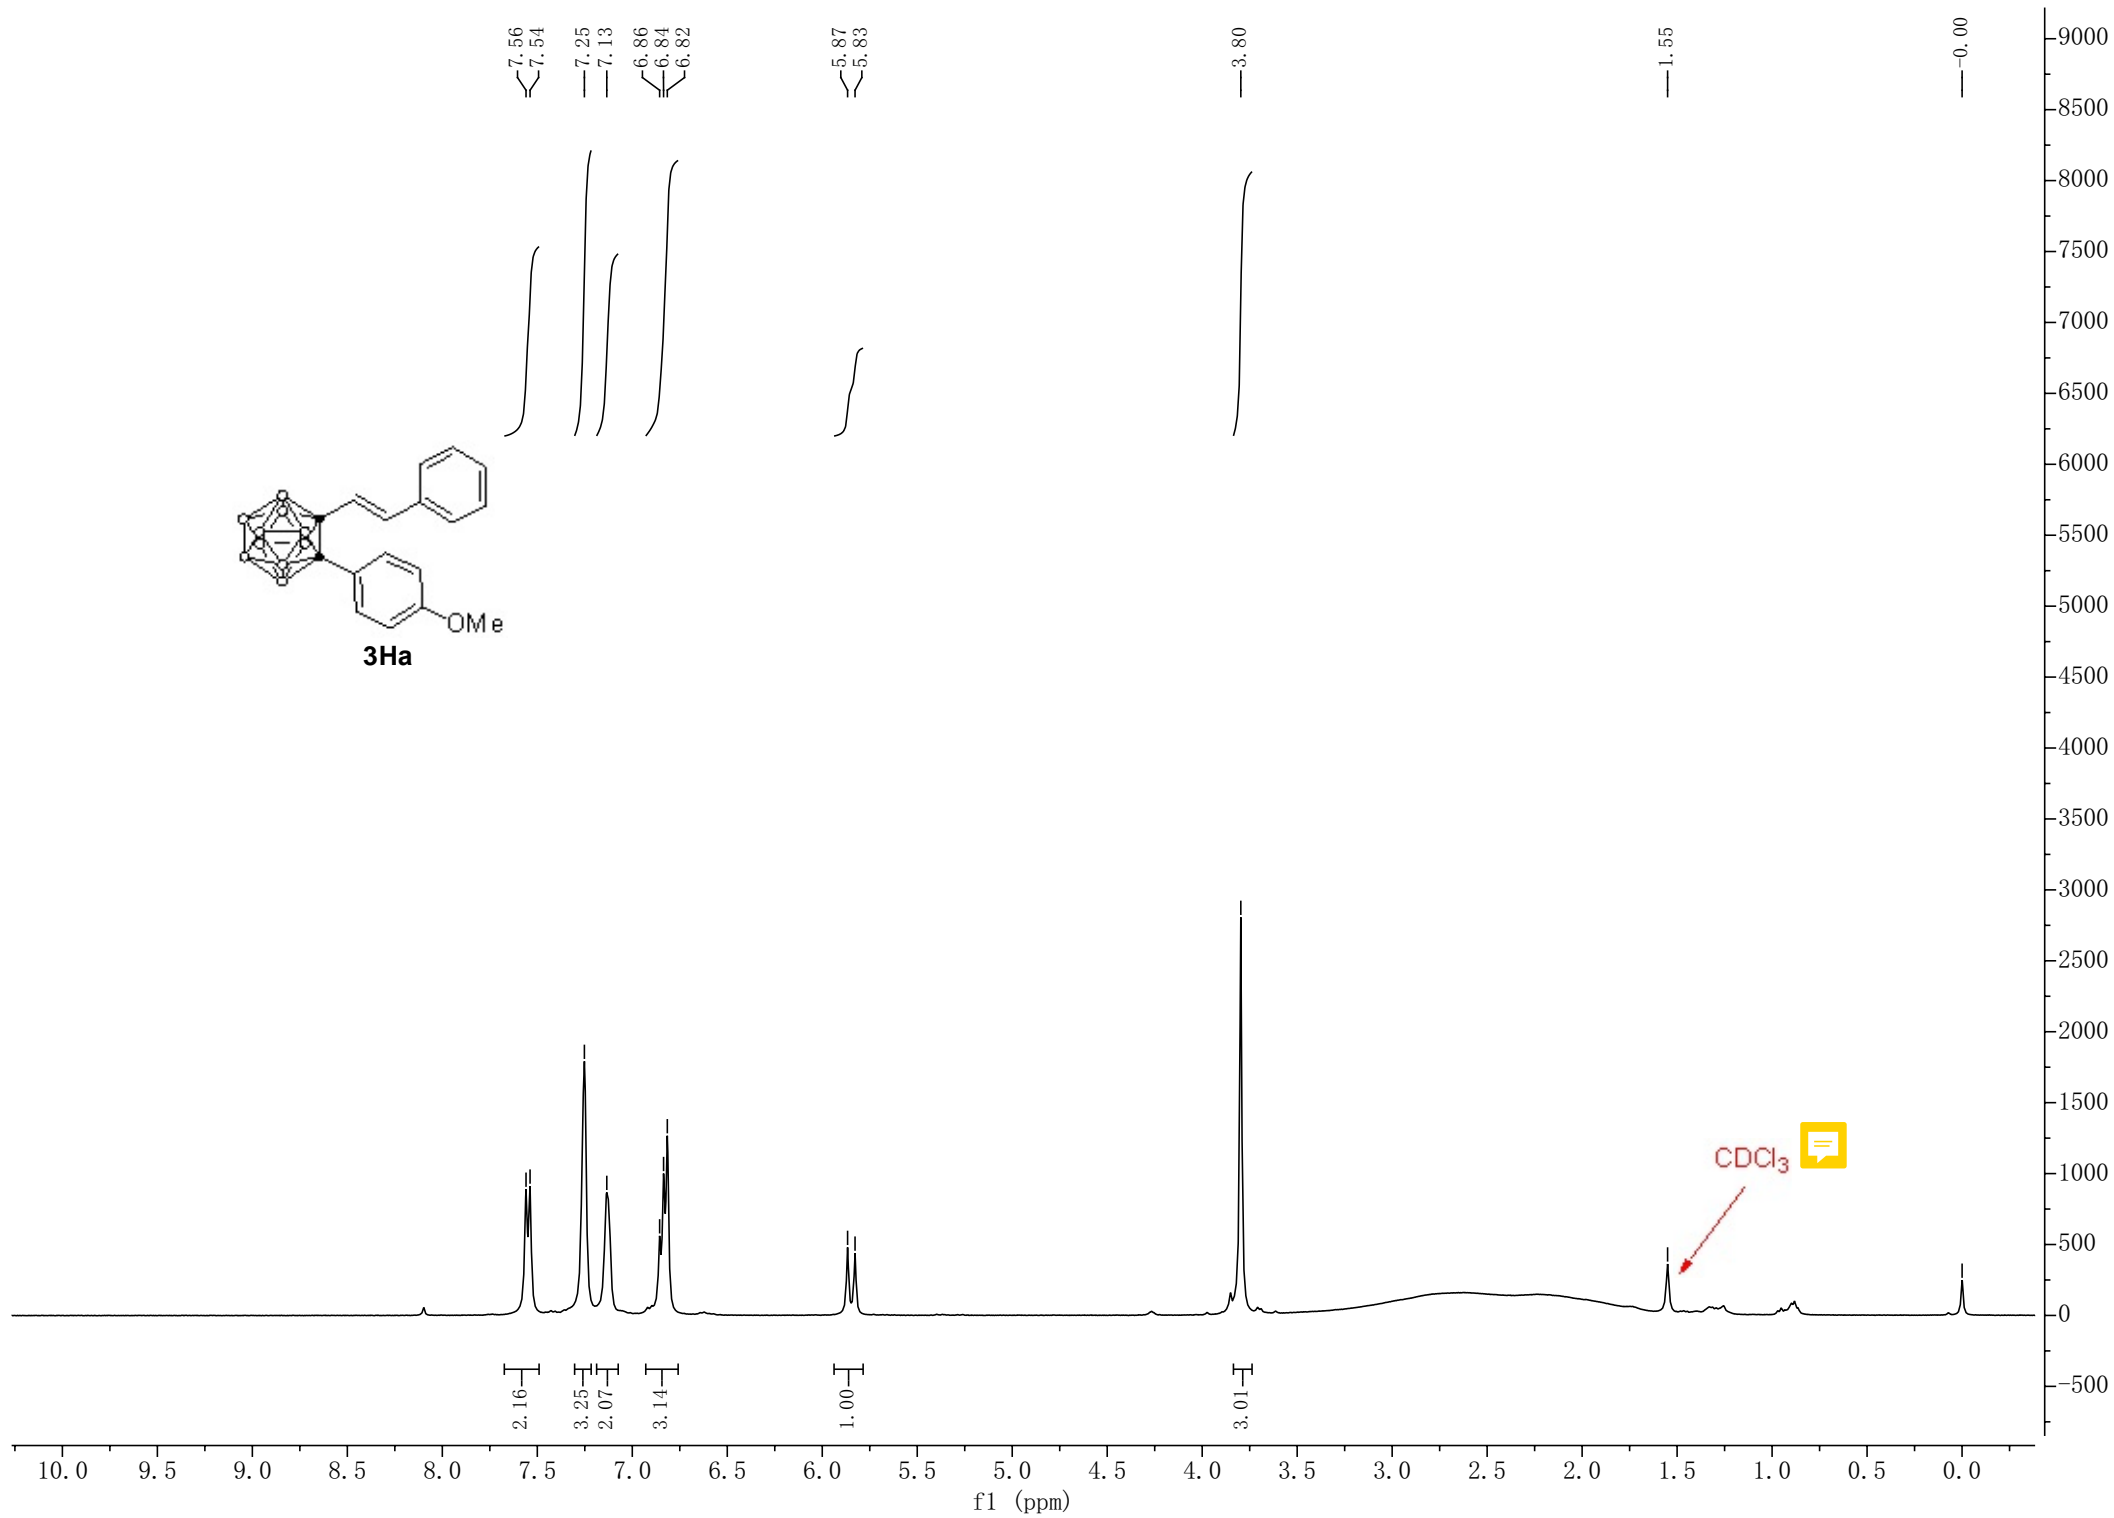

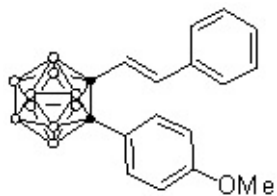

**3Ha**

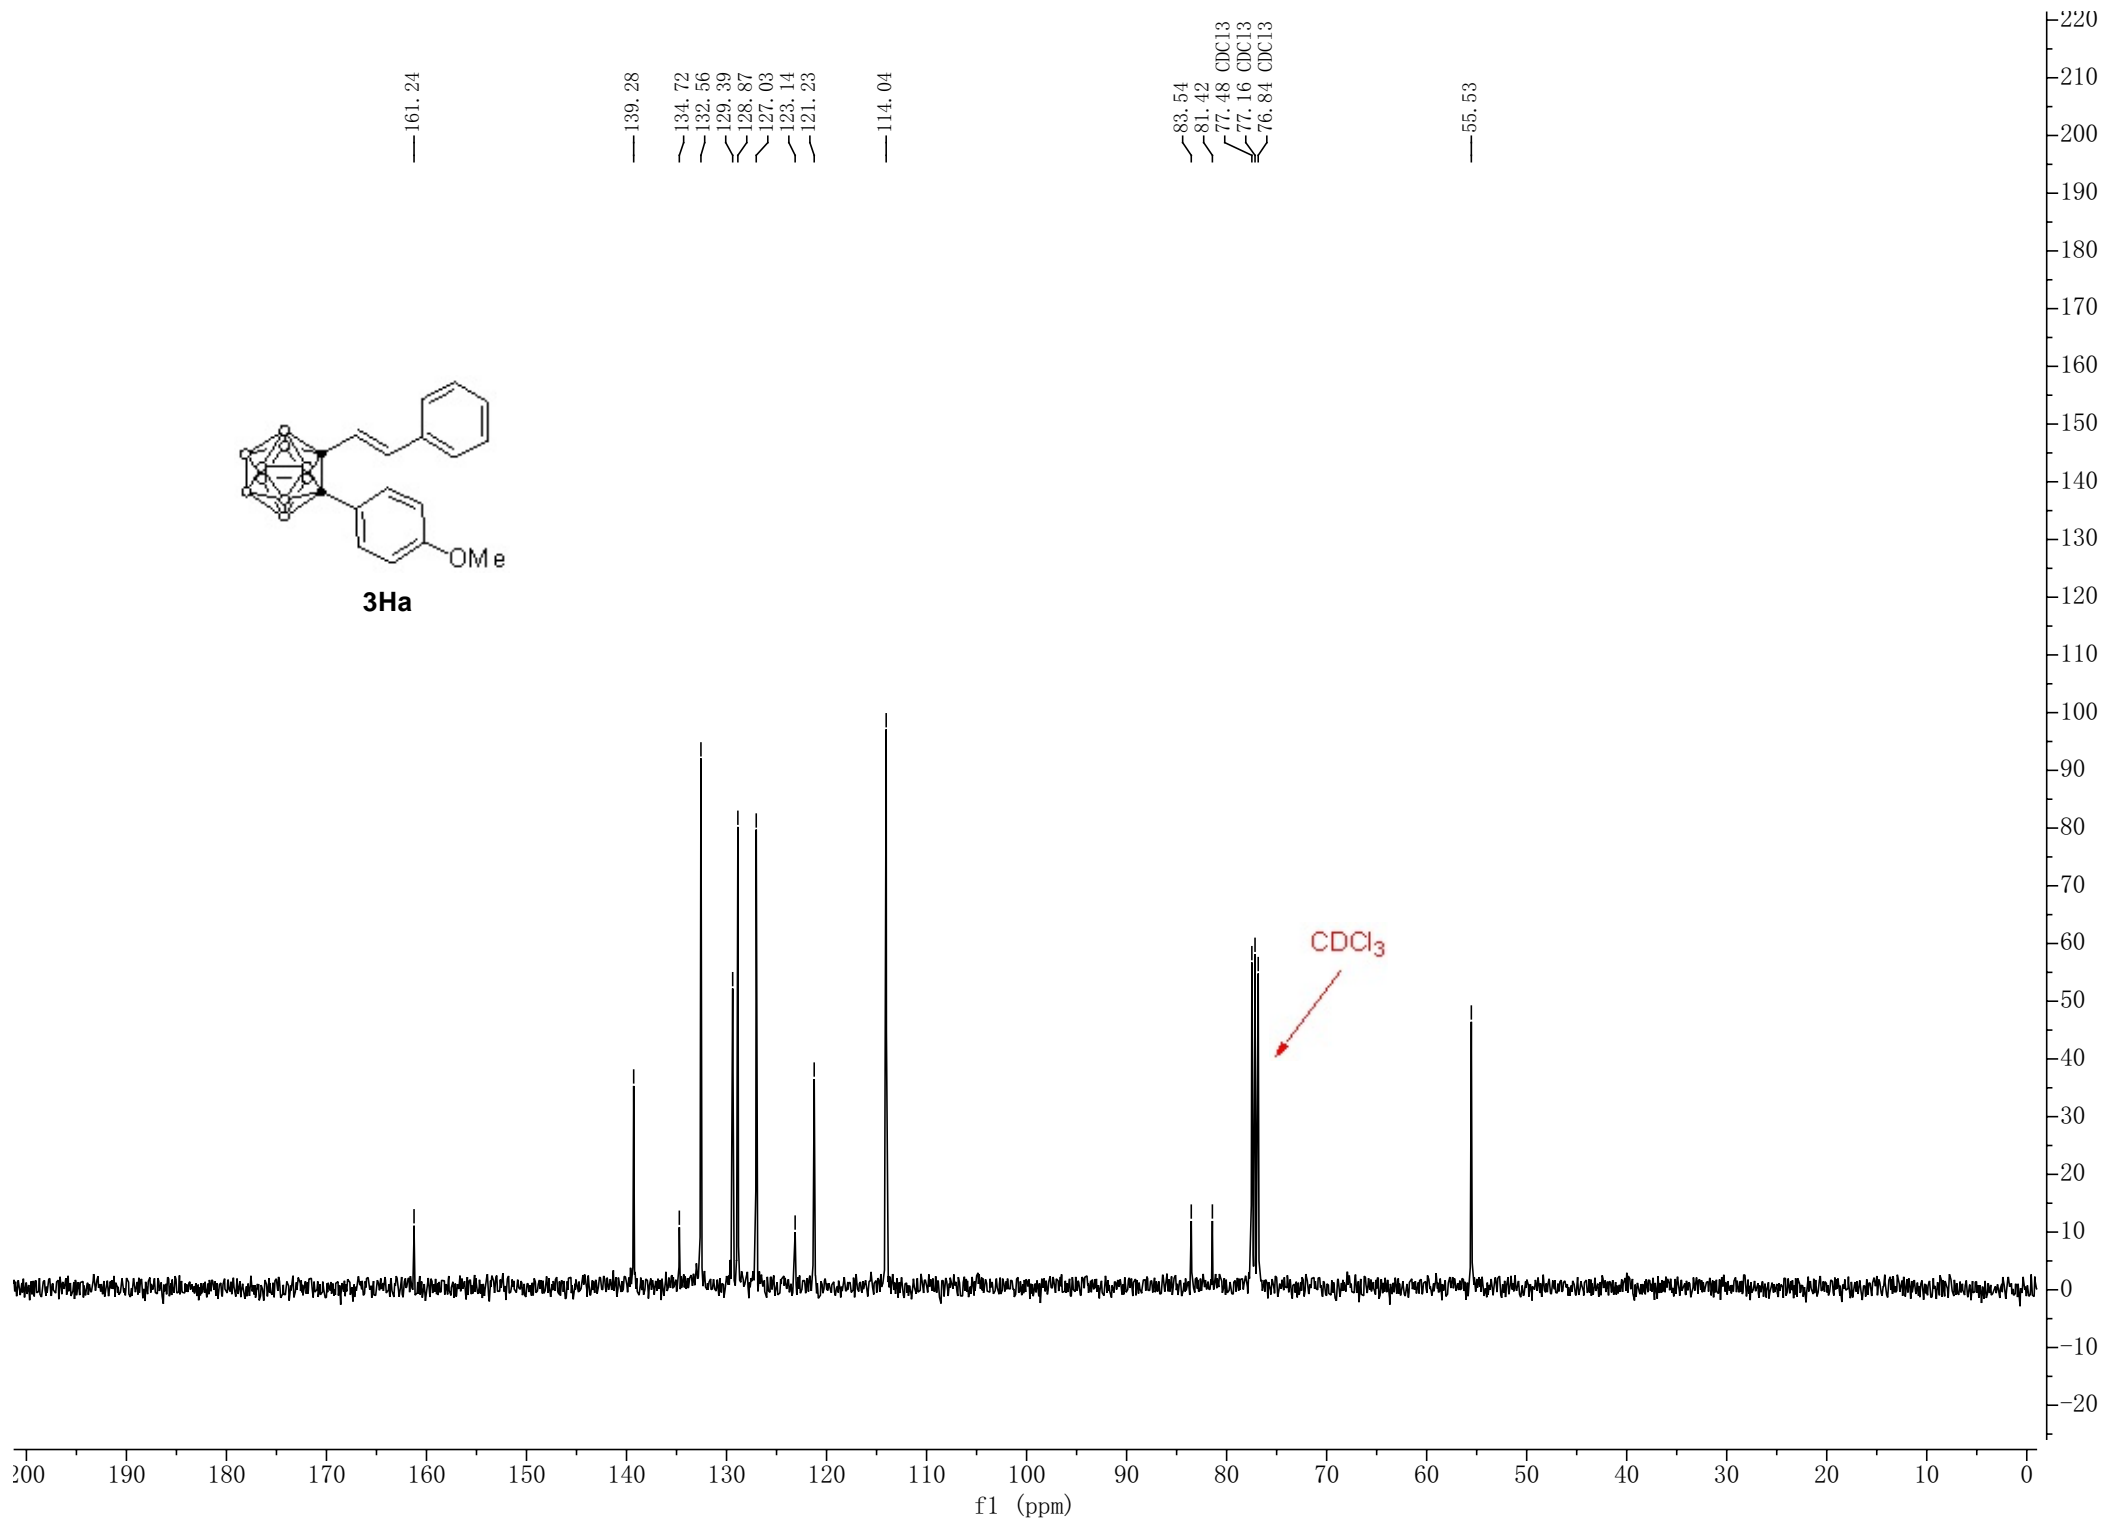

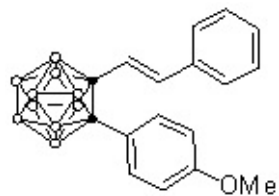

**3Ha**

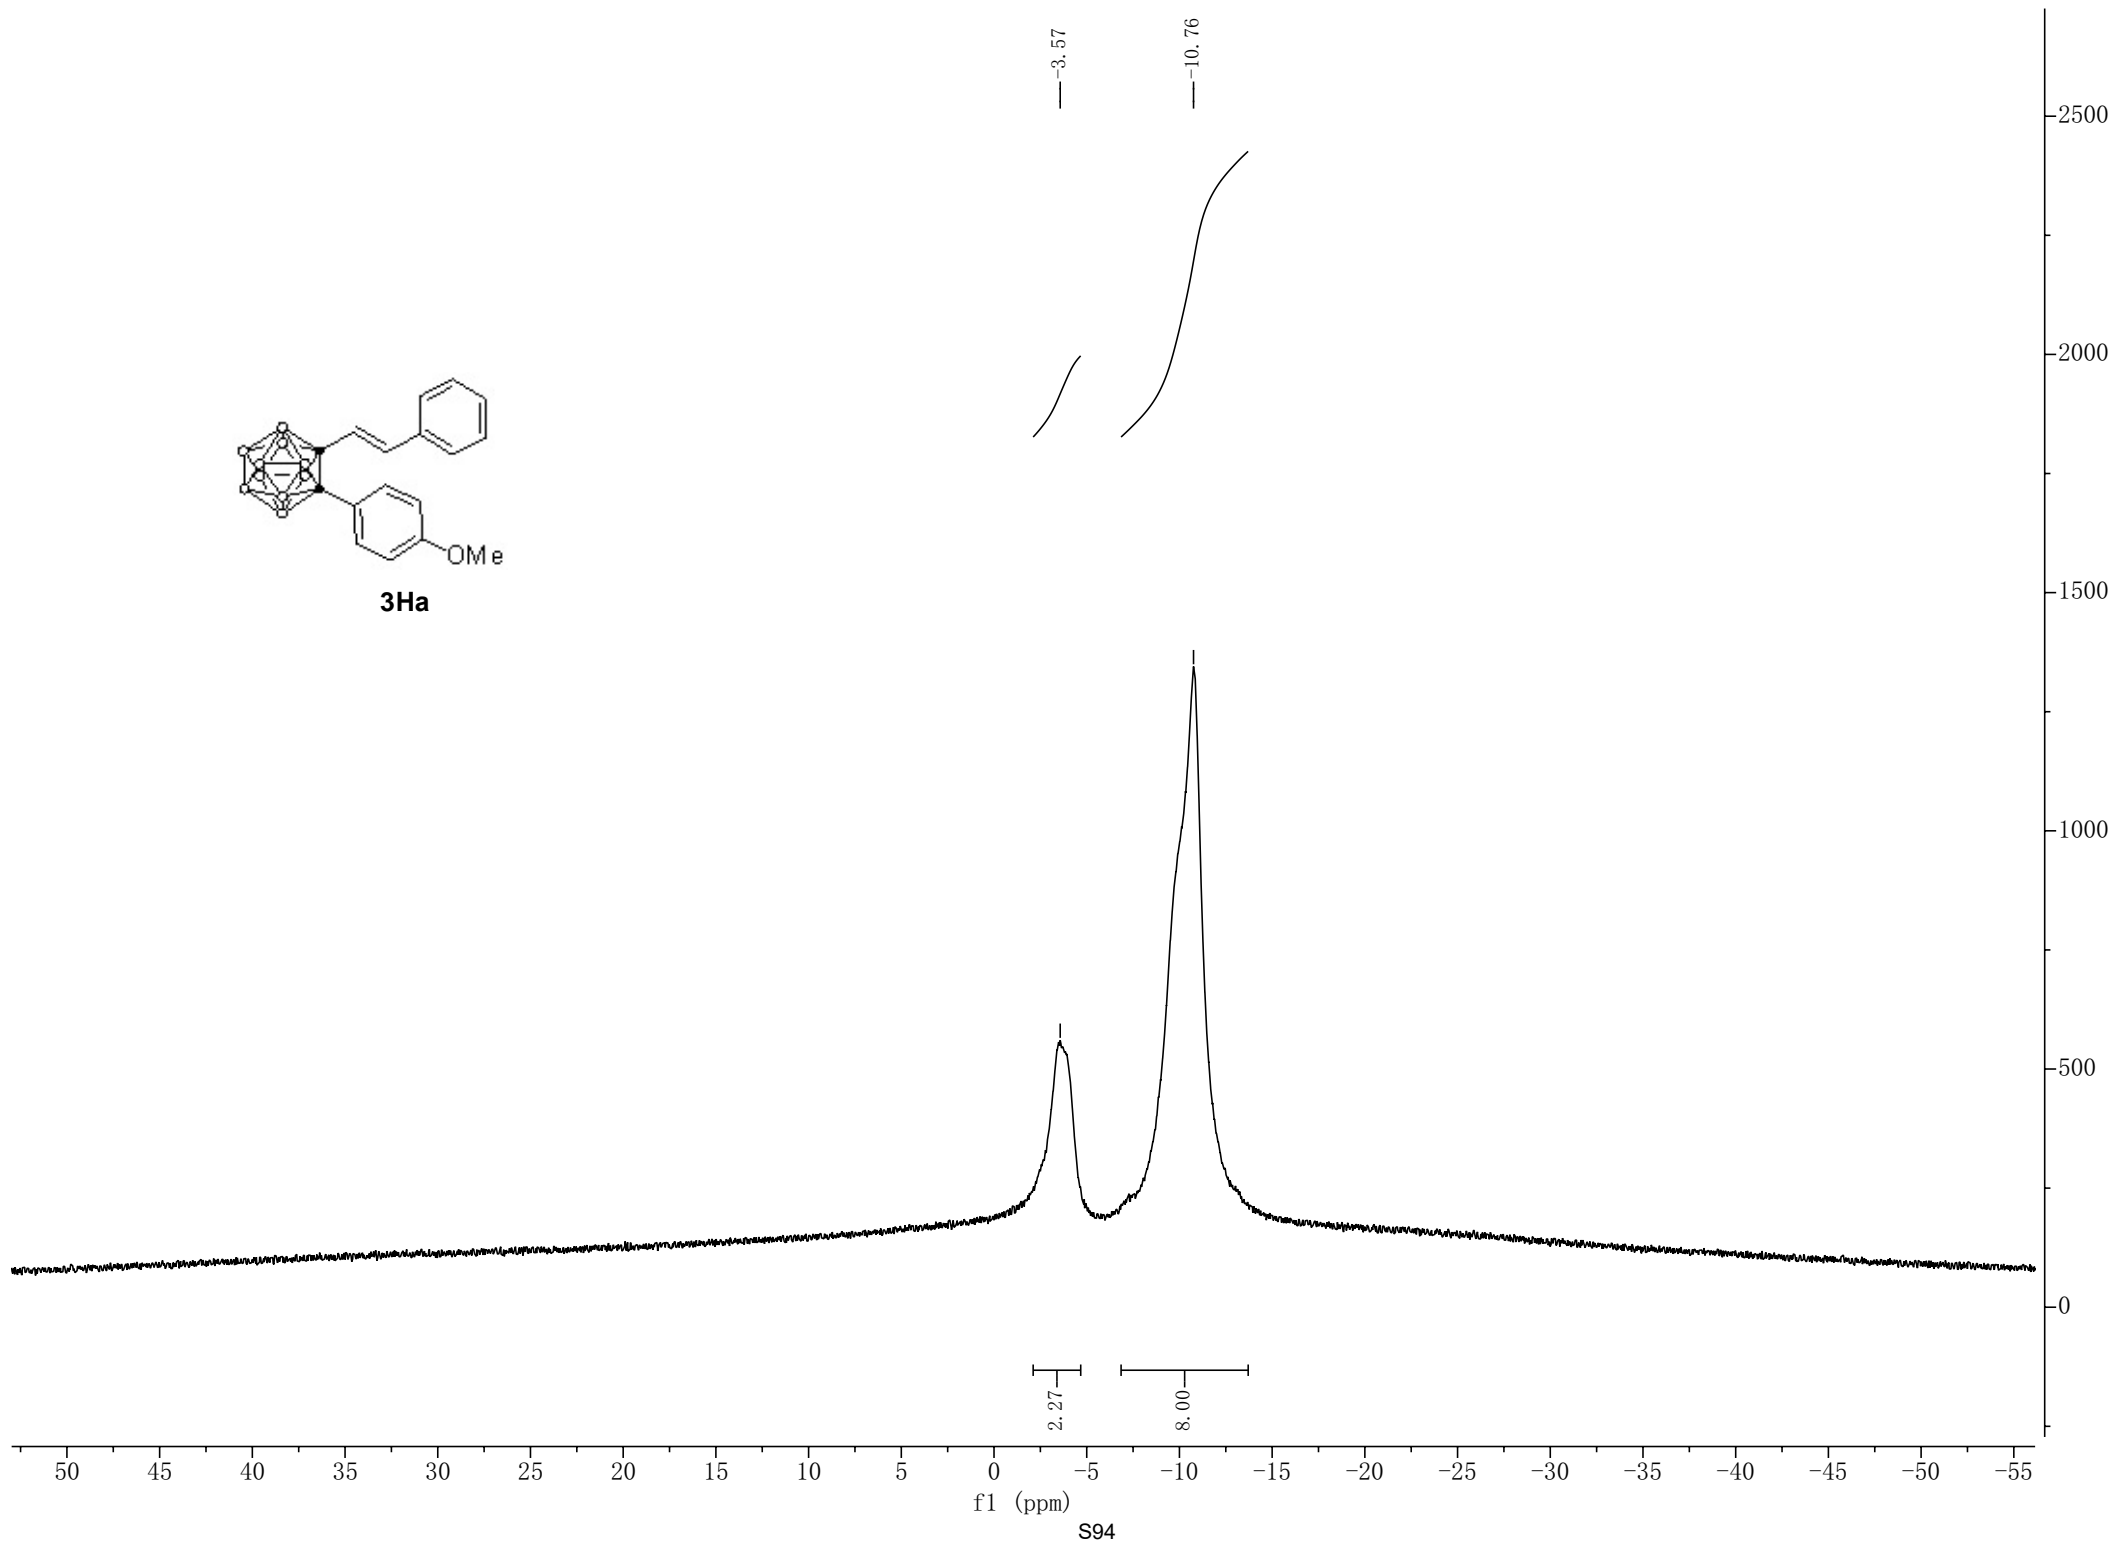

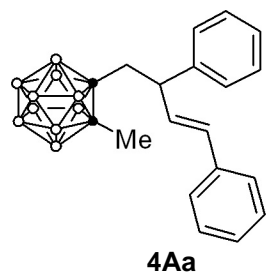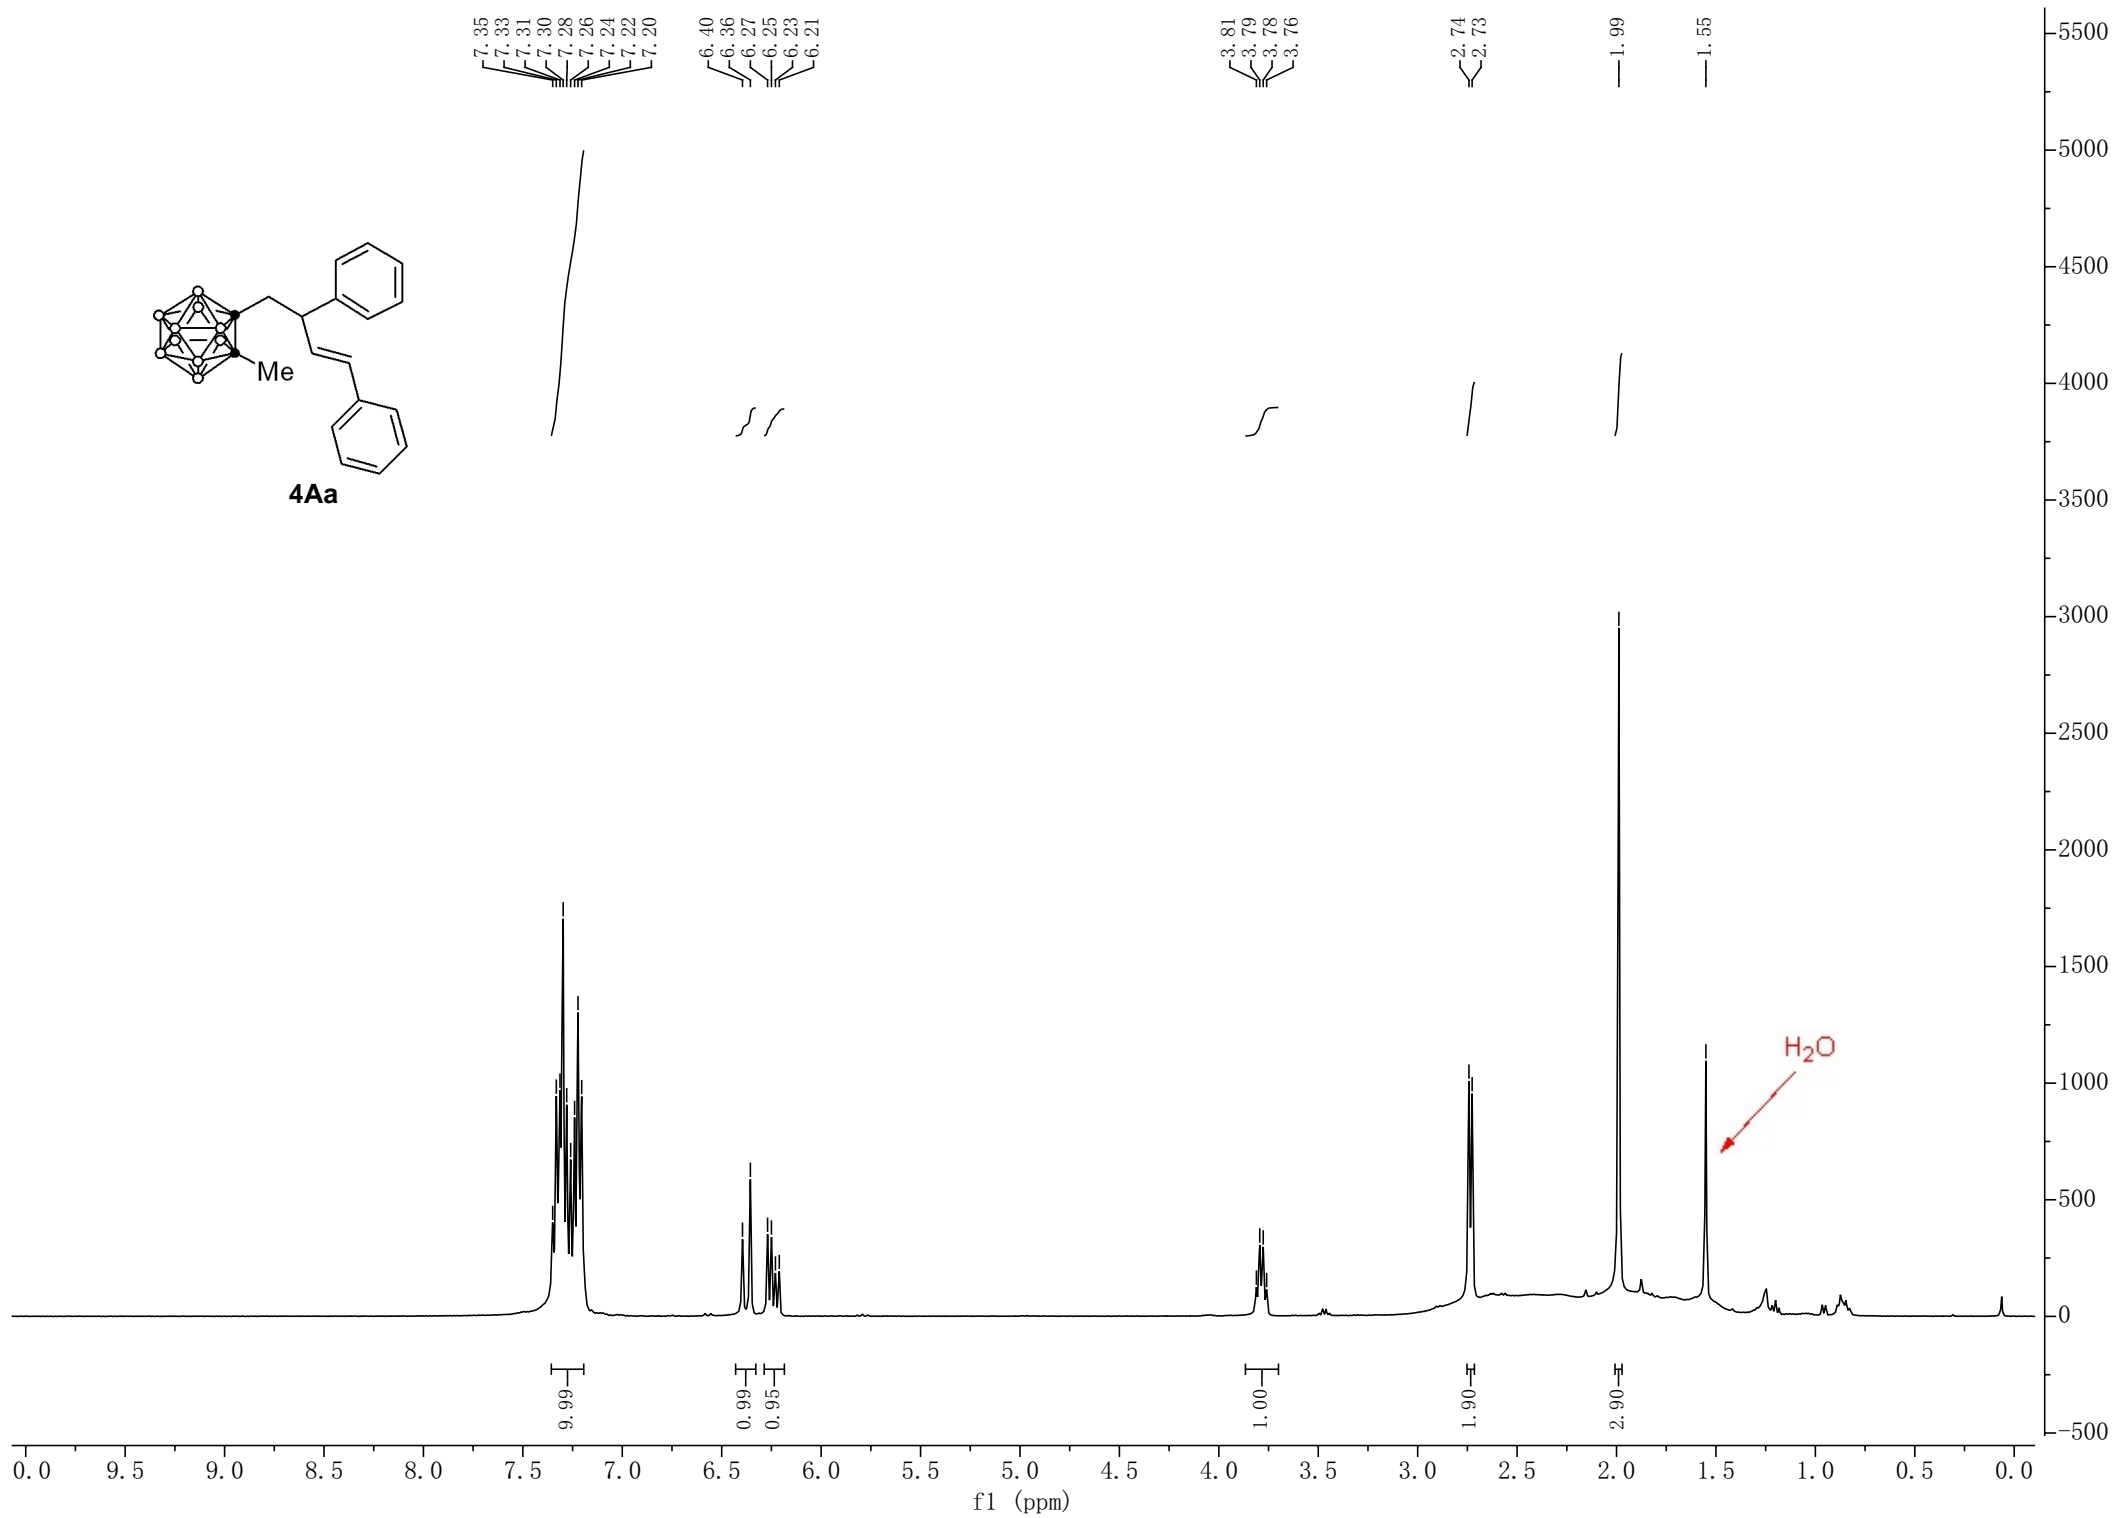

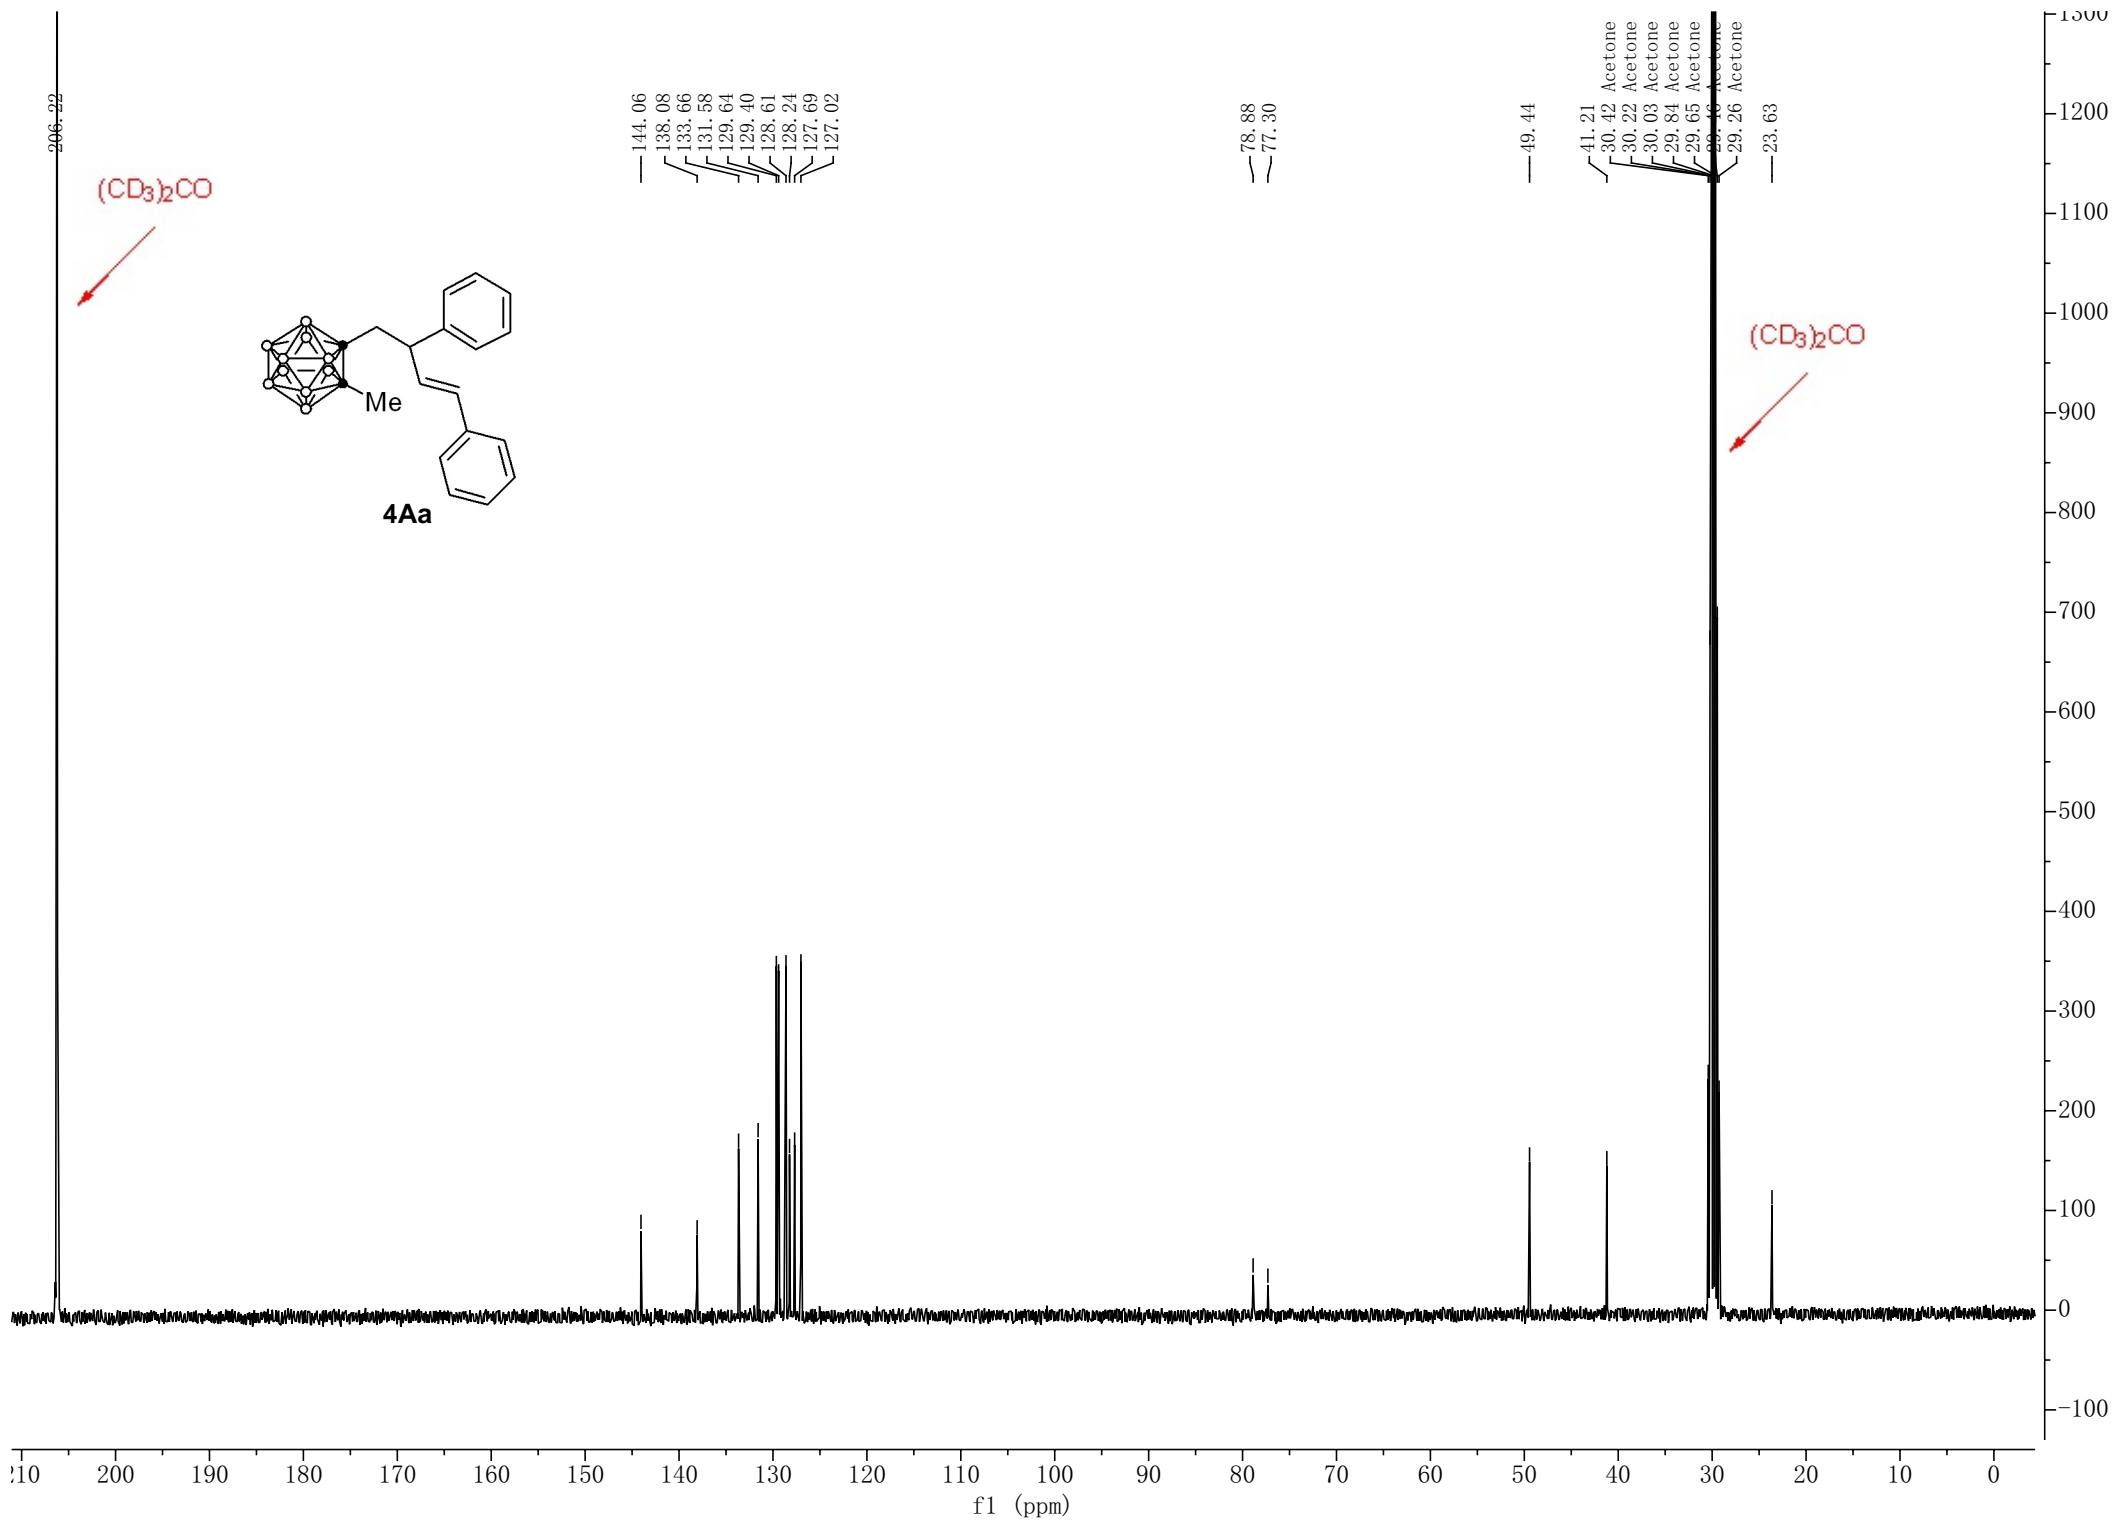



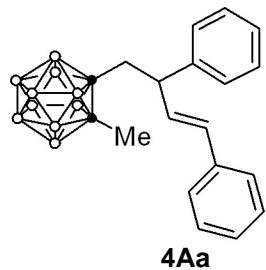

—4.33  
—6.08  
—10.80

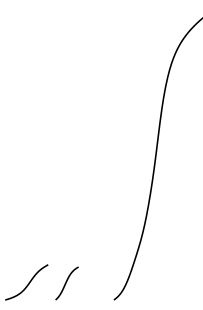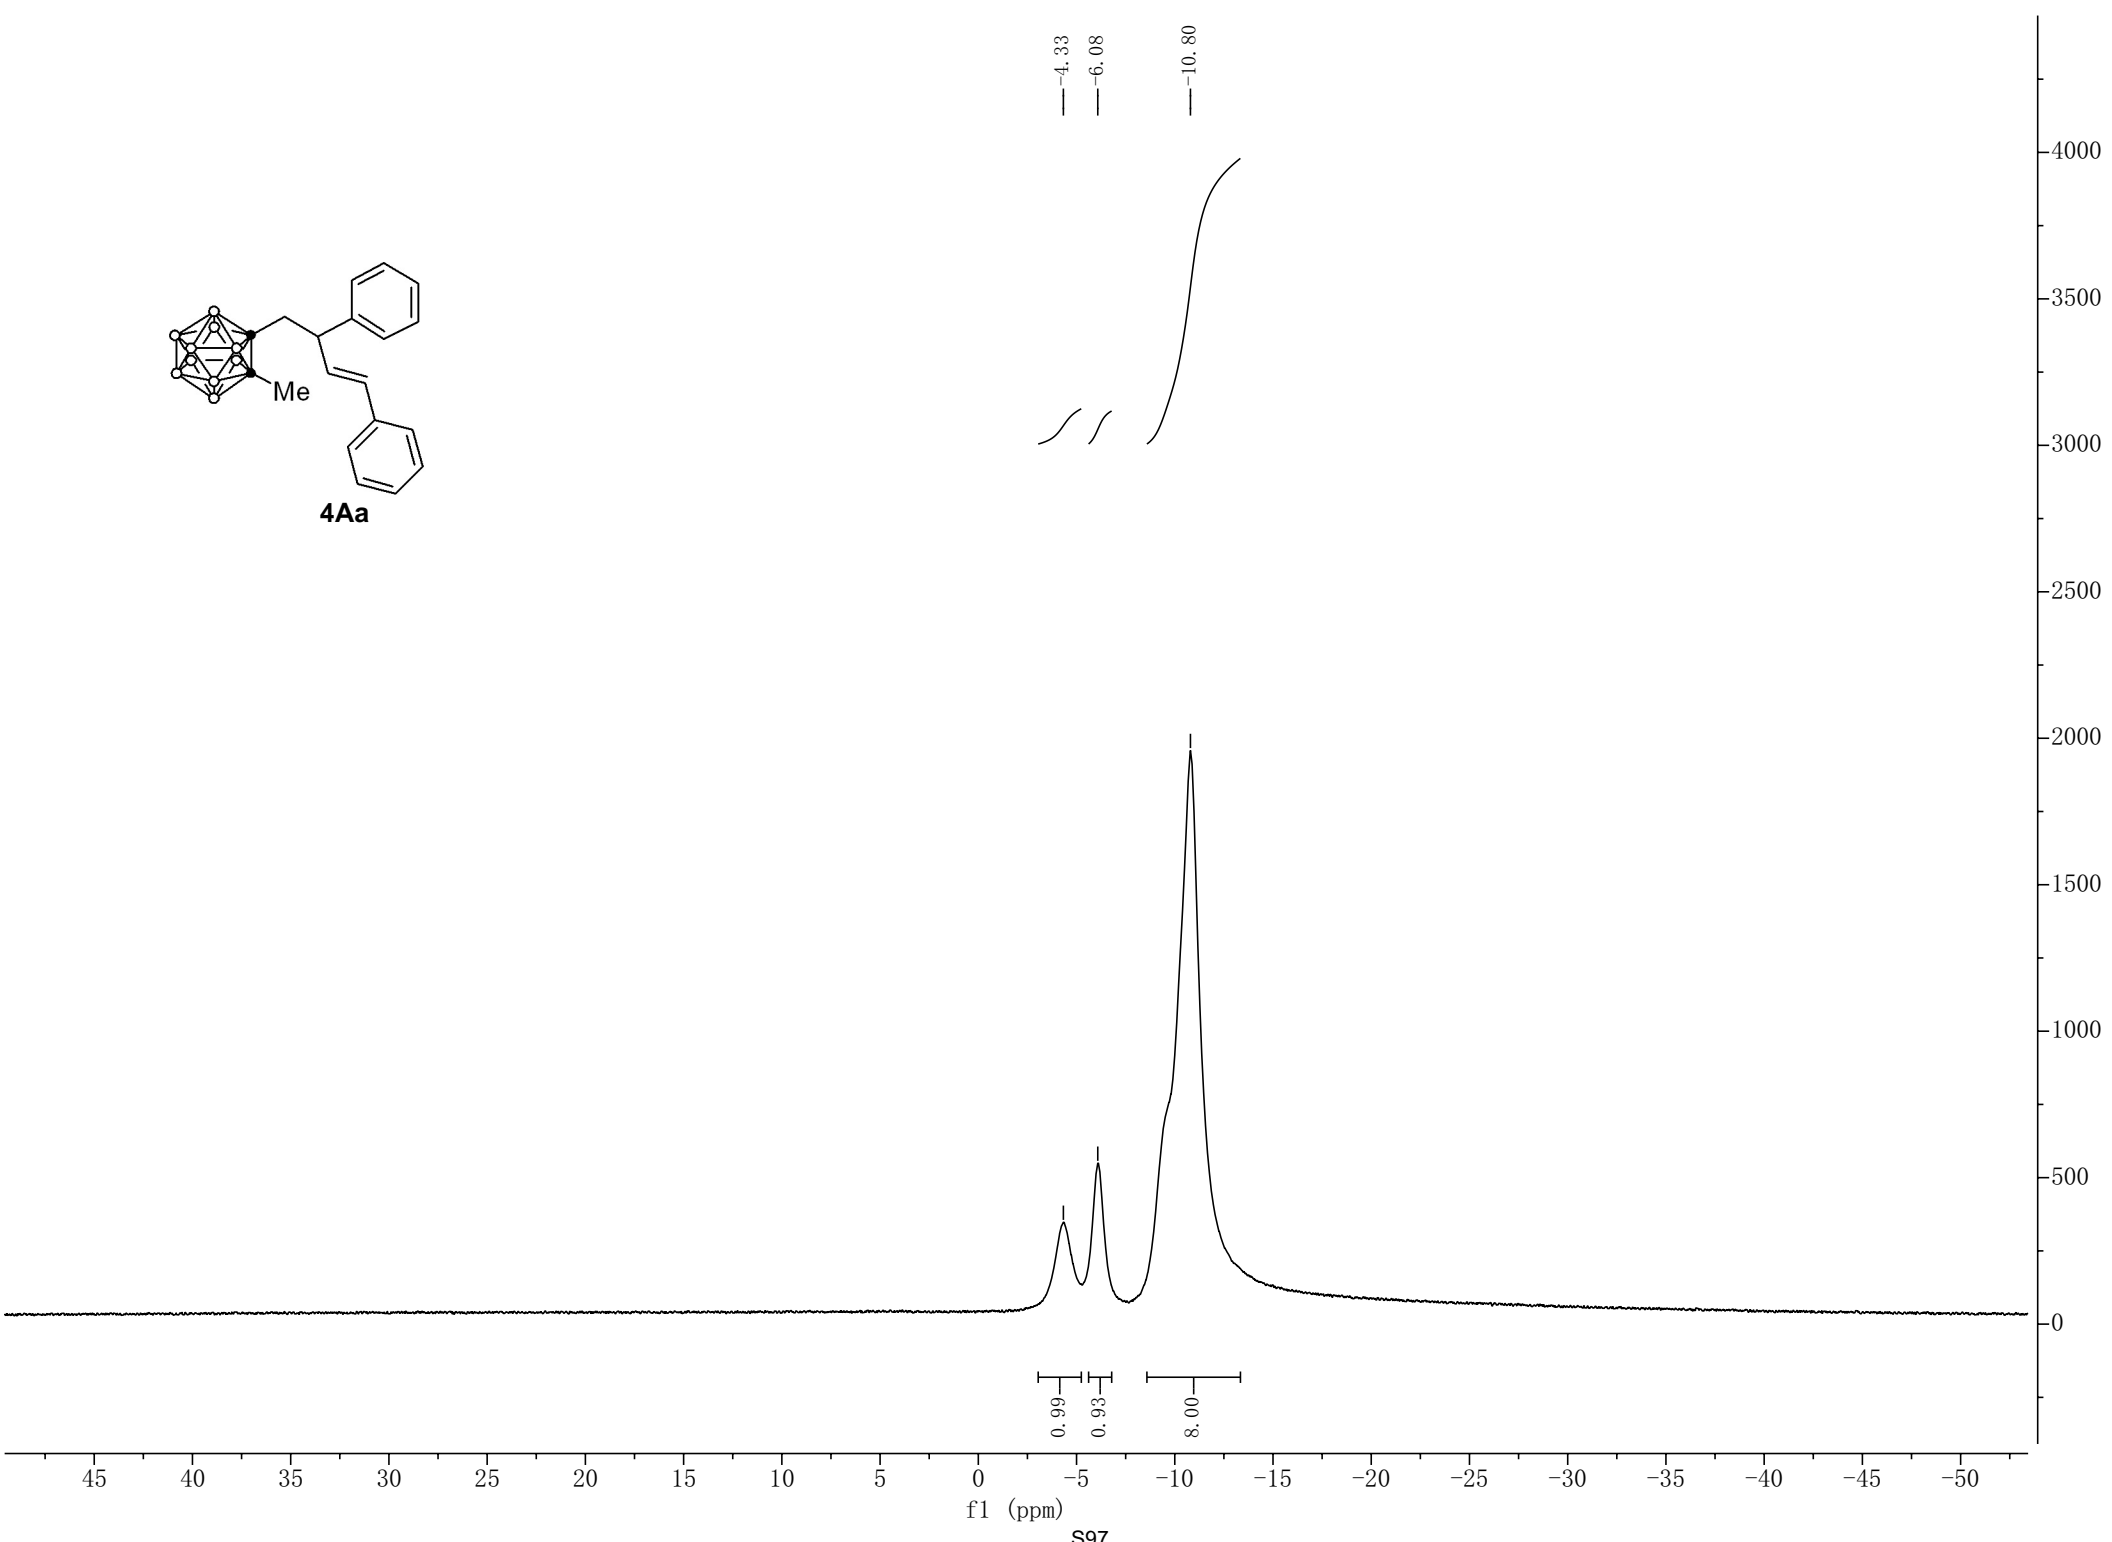

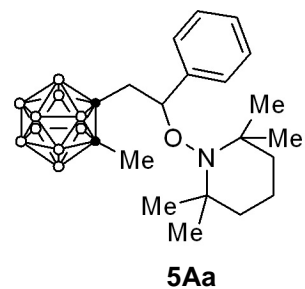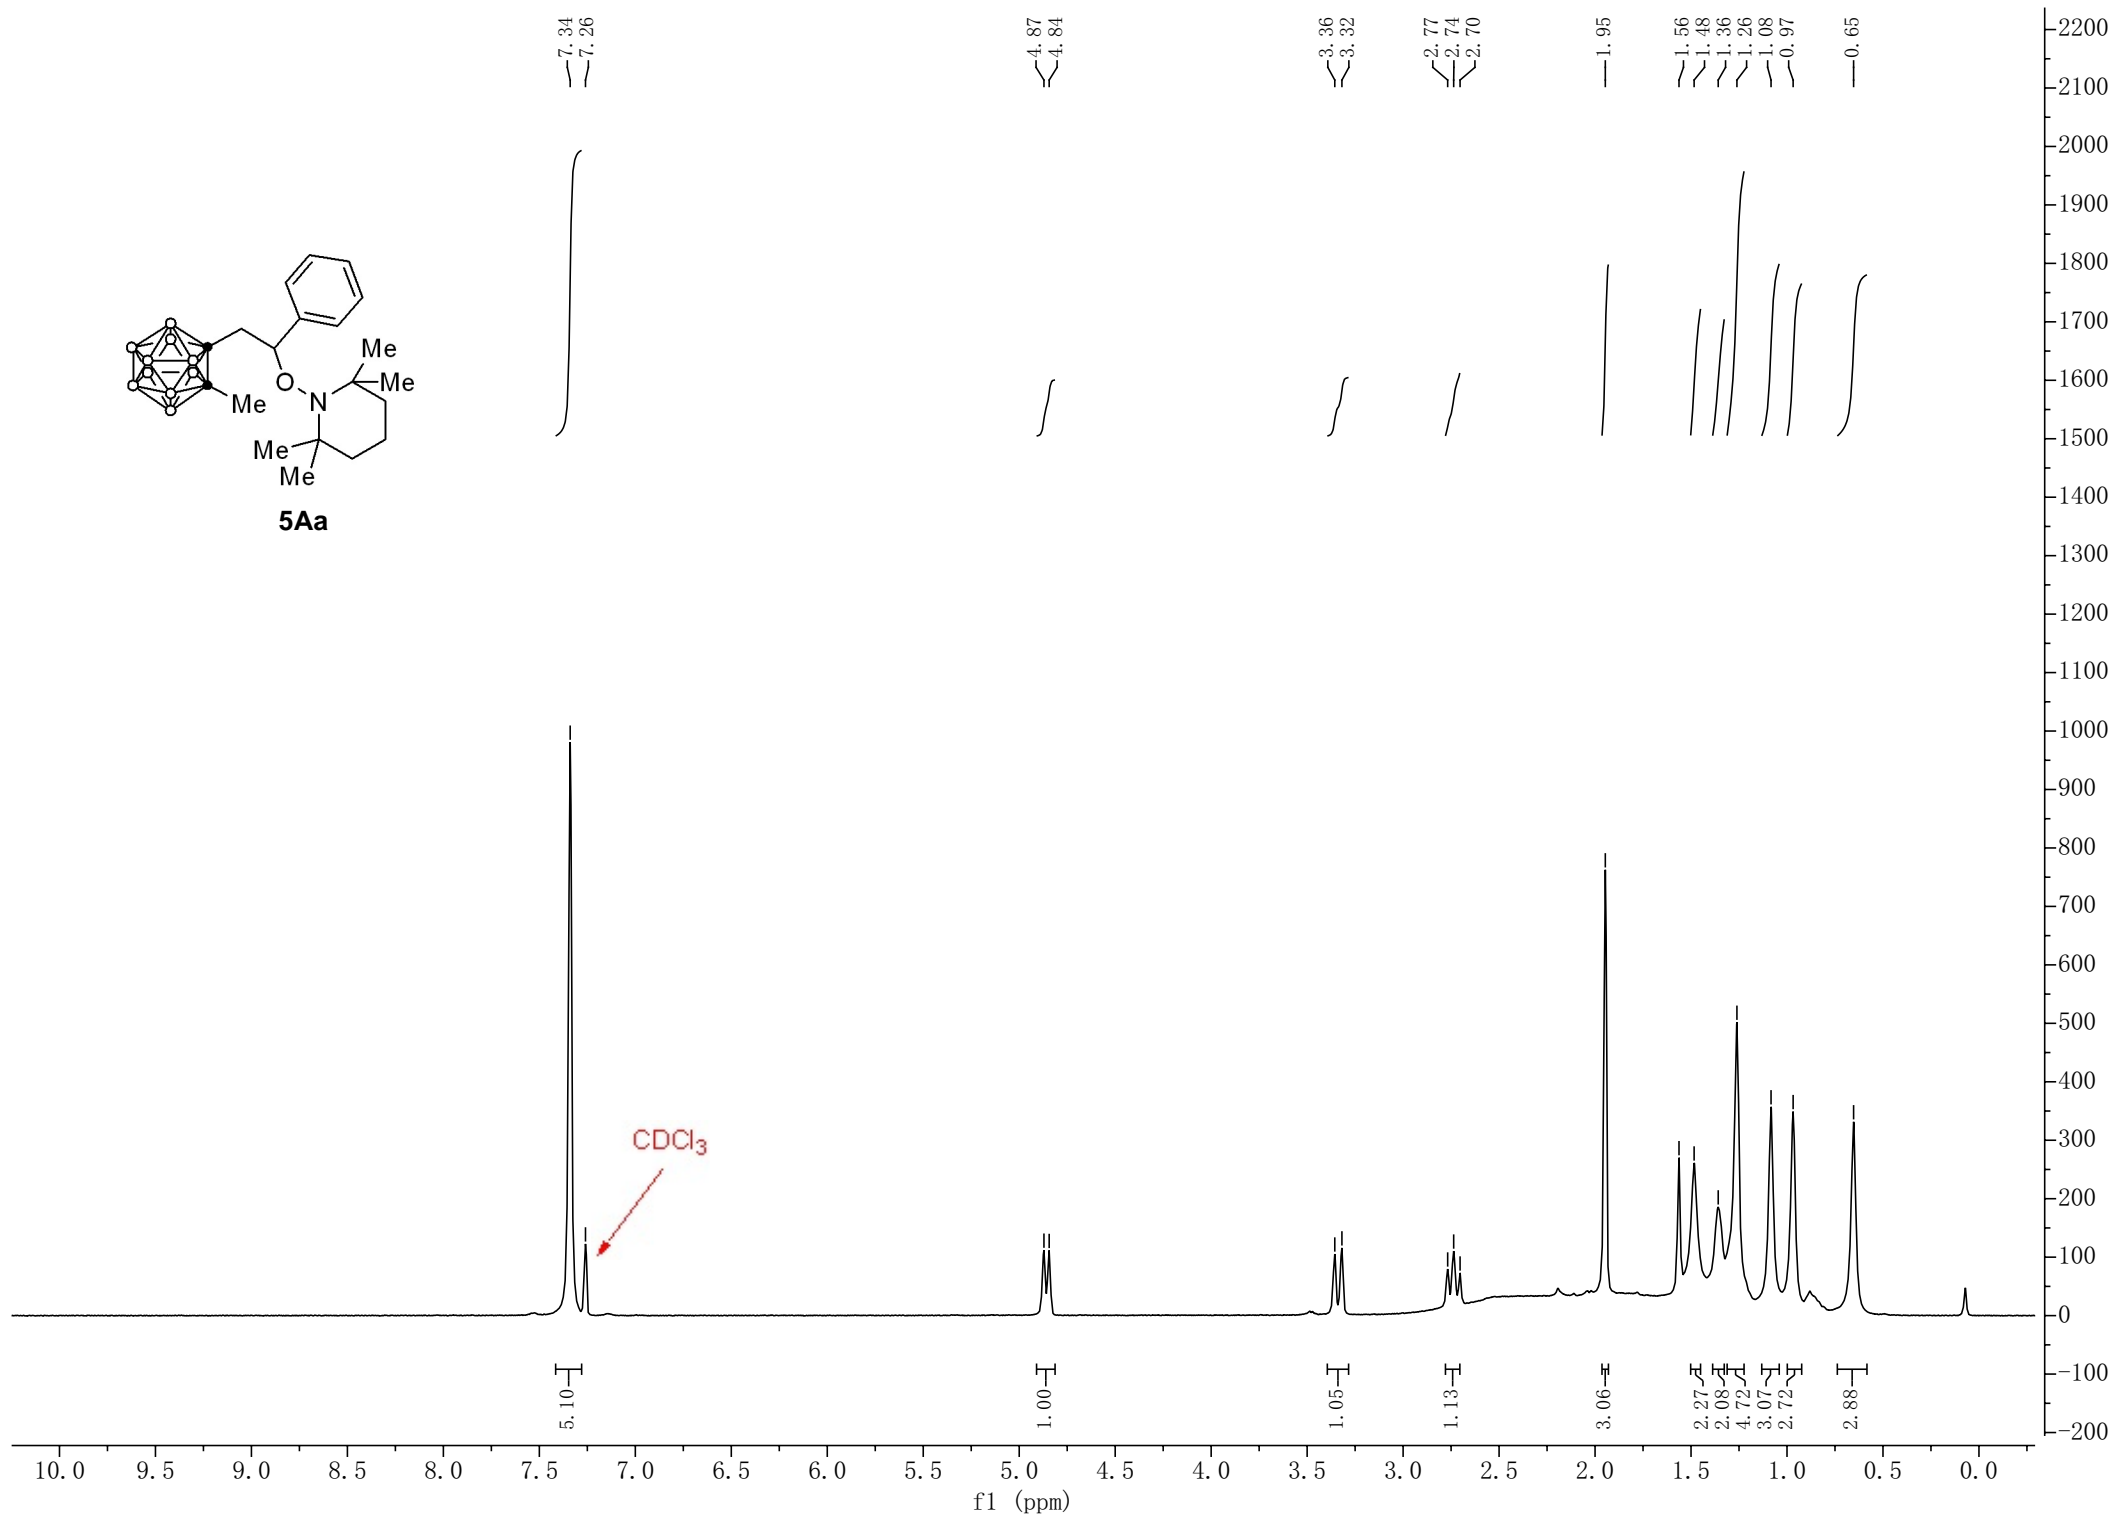

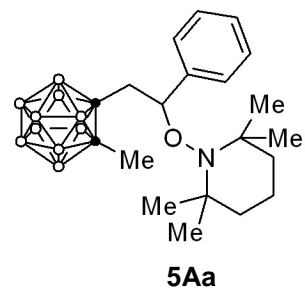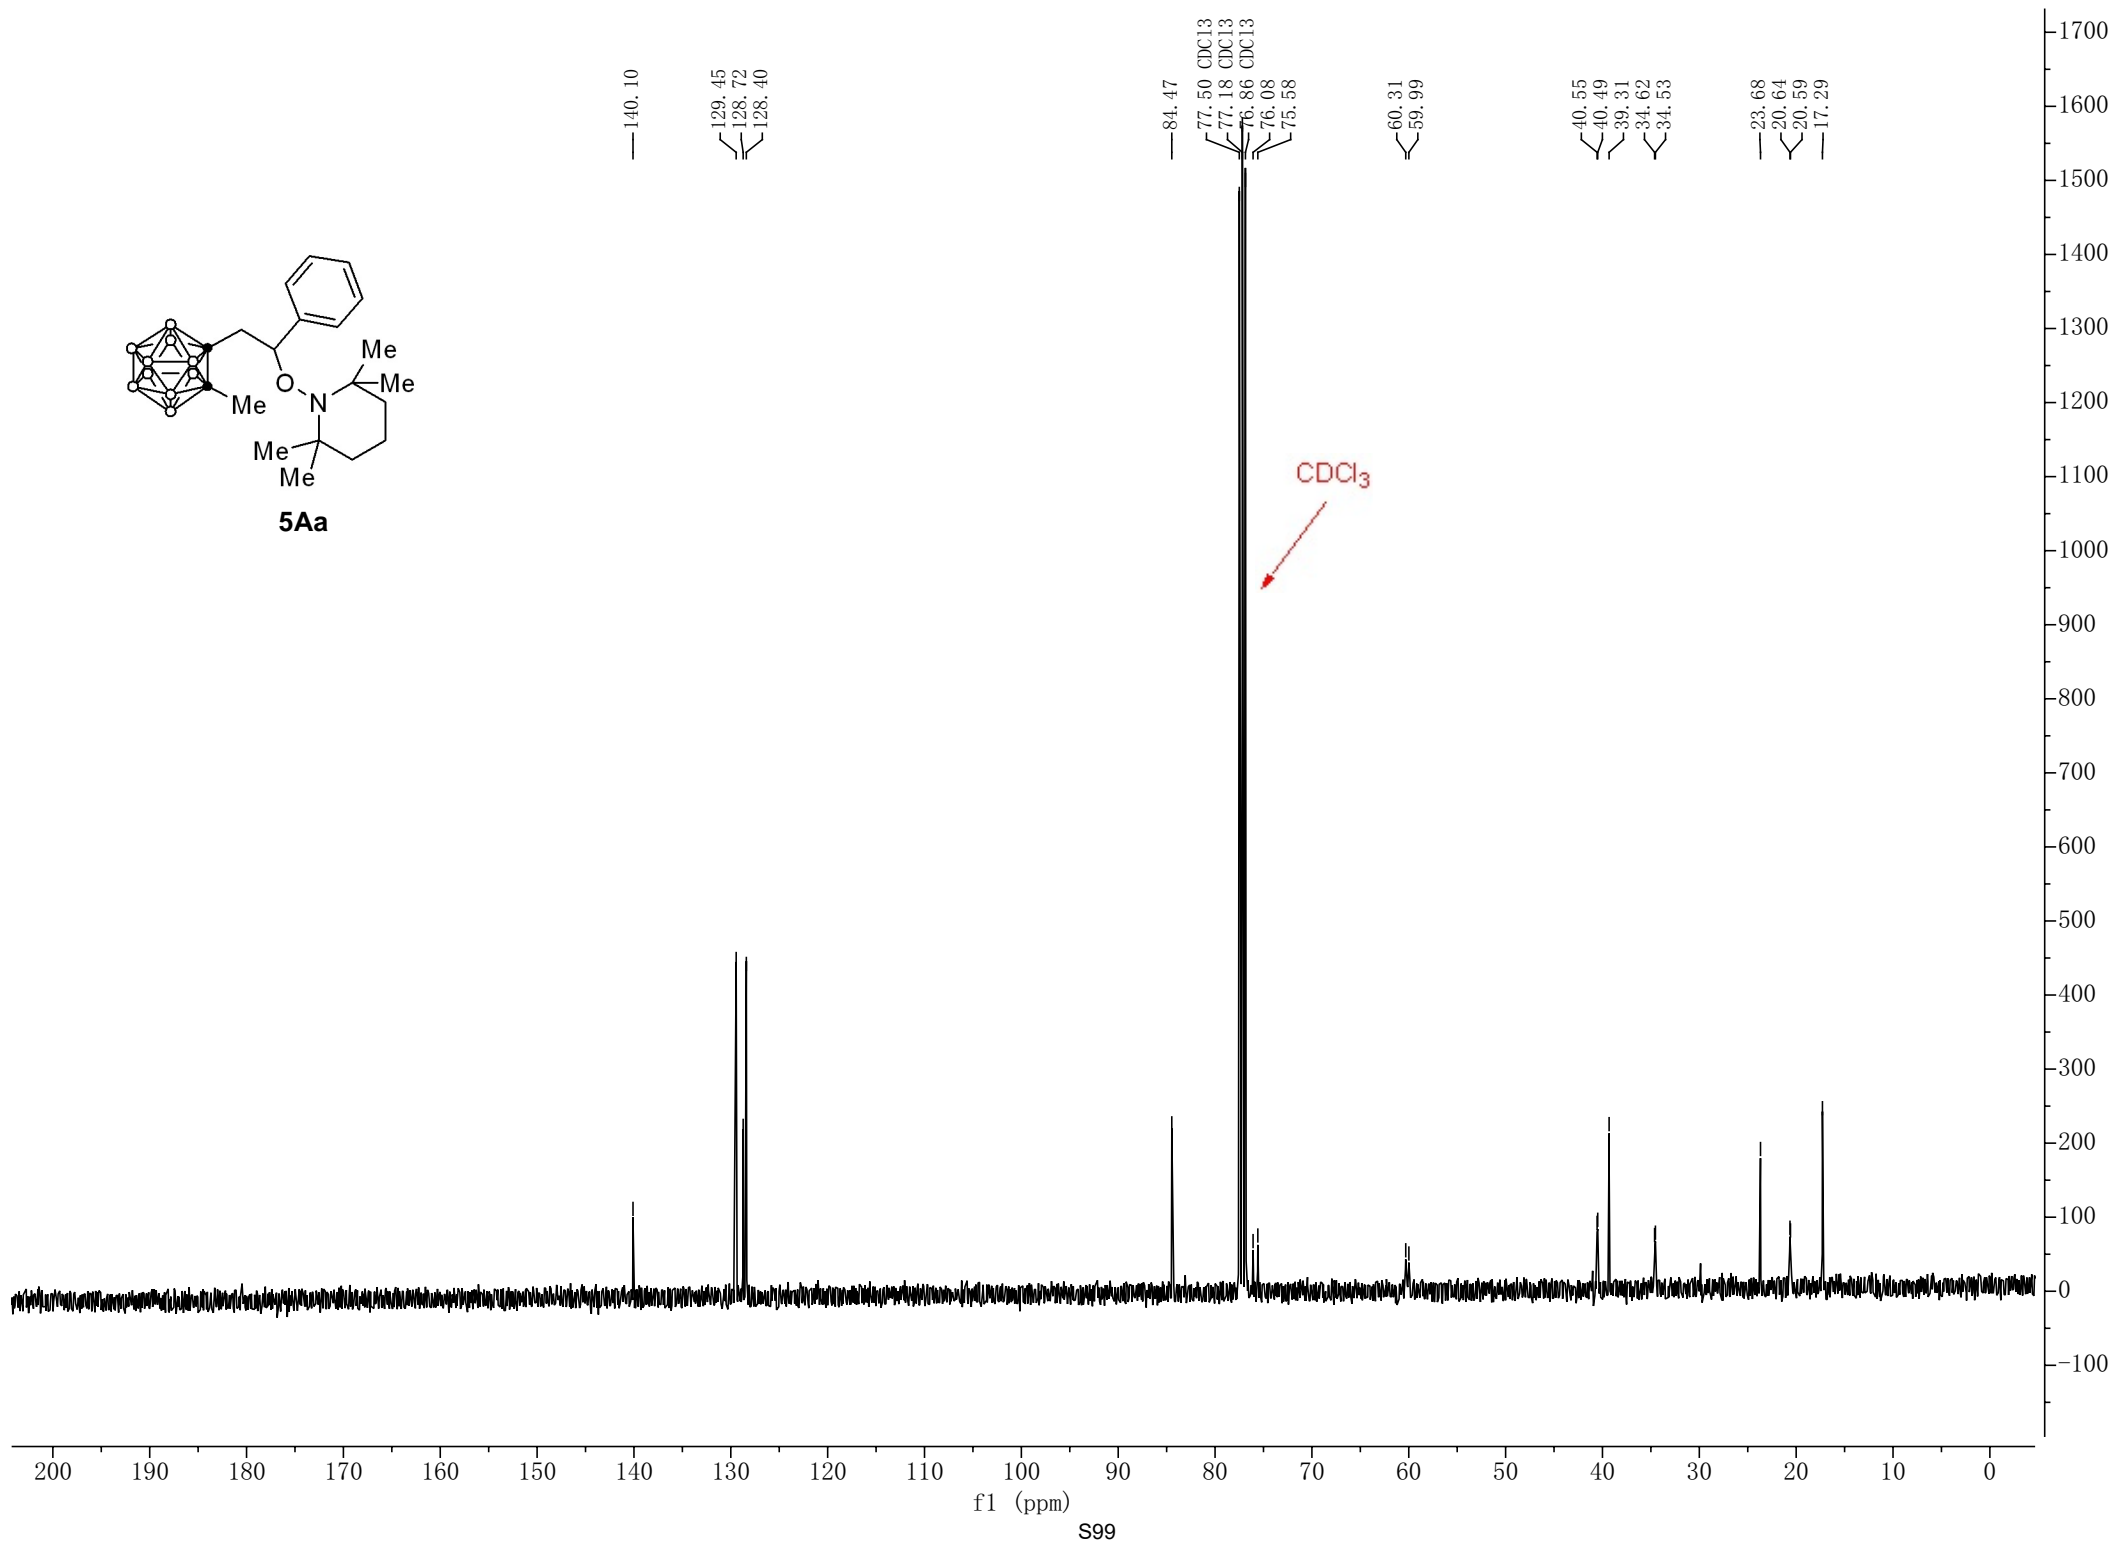

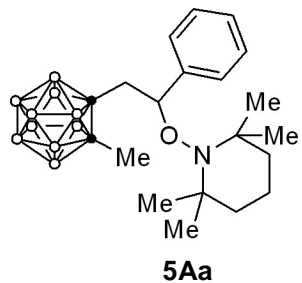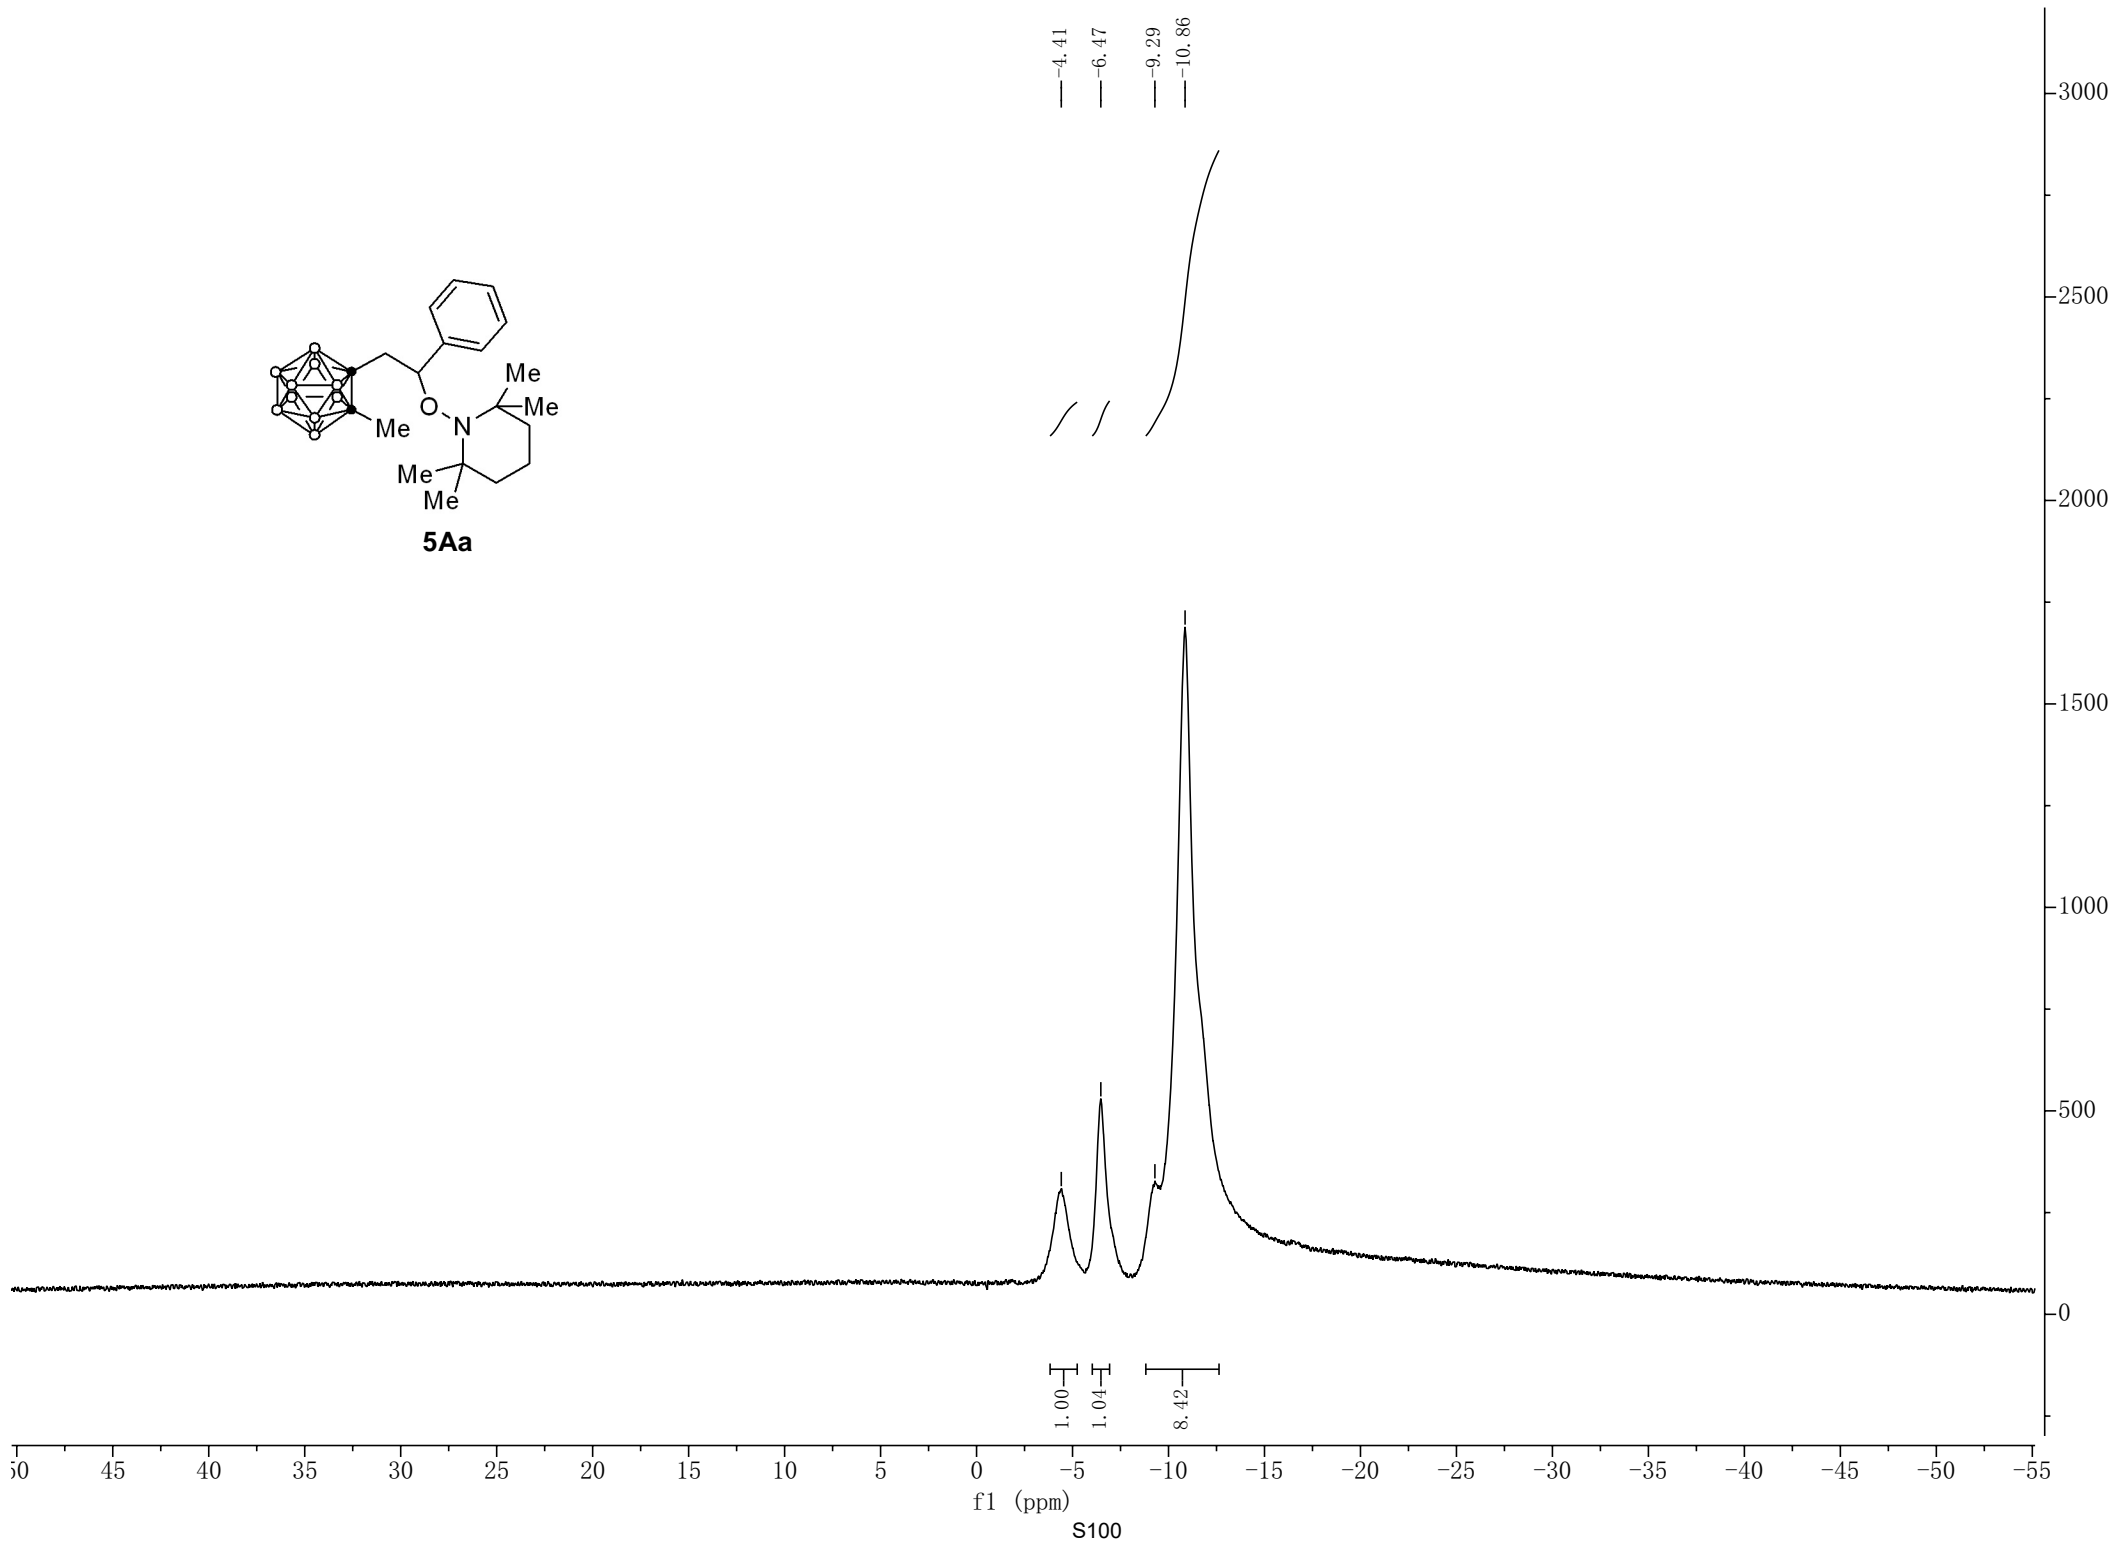

Supplement: d1dt03726a1.pdf [file d1dt03726a1.pdf]
